# Supplementary material for: Differences in X-Chromosome Transcriptional Activity and Cholesterol Metabolism between Placentae from Swine Breeds from Asian and Western Origins
Source: PubMed Central journal article supplement (PMC3561265; doi:10.1371/journal.pone.0055345), 2013-01-31
Supplement: pone.0055345.s005.pdf [file pone.0055345.s005.pdf]

Supplemental Table S2. Summary of placental gene expression differences

| Gene Name | Gene Description                                                                                 | Probe Set ID         | Breed MS-WC                 | Day 25 MS-WC            | Day 45 MS-WC               | Day 65 MS-WC            | Day 85 MS-WC             | Day 105 MS-WC            |
|-----------|--------------------------------------------------------------------------------------------------|----------------------|-----------------------------|-------------------------|----------------------------|-------------------------|--------------------------|--------------------------|
| ABCA1     | ATP-binding cassette, sub-family A (ABC1), member 1                                              | Ssc.7146.1.A1_at     | -3.43 q < 0                 | -2.54 q < 0             | -3.37 q < 0                | -4.05 q < 0             | -3.96 q < 0              | -3.47 q < 0              |
| ALDH7A1   | aldehyde dehydrogenase 7 family, member A1                                                       | Ssc.17284.1.A1_at    | -1.74 q < 0                 | -1.67 q < 0.00225       | -2.06 q < 0.000000116      | -1.57 q < 0.00184       | -1.71 q < 0.000152       | -1.71 q < 0.000725       |
| ALDH7A1   | aldehyde dehydrogenase 7 family, member A1                                                       | Ssc.11751.1.S1_at    | -1.11 q < 0.232             | -1.06 q < 1             | -1.45 q < 0.039            | 1.07 q < 0.79           | -1.03 q < 1              | -1.15 q < 1              |
| CCL28     | chemokine (C-C motif) ligand 28                                                                  | Ssc.7568.1.A1_at     | -1.71 q < 0                 | -2.39 q < 0.0000000991  | -1.55 q < 0.0282           | -1.51 q < 0.0322        | -1.58 q < 0.0299         | -1.63 q < 0.00825        |
| CPSF3     | cleavage and polyadenylation specific factor 3, 73kDa                                            | Ssc.786.1.S1_at      | -1.58 q < 0                 | -1.58 q < 0.000123      | -1.64 q < 0.000148         | -1.53 q < 0.000306      | -1.57 q < 0.00019        | -1.59 q < 0.000573       |
| CXorf39   | family with sequence similarity 199, X-linked                                                    | Ssc.3940.2.A1_at     | -1.73 q < 0                 | -1.83 q < 0.0000000167  | -1.87 q < 0.0000000702     | -1.71 q < 0.00000125    | -1.76 q < 0.000000375    | -1.53 q < 0.000361       |
| CXorf39   | family with sequence similarity 199, X-linked                                                    | Ssc.3940.1.S1_at     | -1.45 q < 0                 | -1.51 q < 0.000303      | -1.45 q < 0.00142          | -1.35 q < 0.0147        | -1.52 q < 0.000216       | -1.42 q < 0.00319        |
| EXOC2     | exocyst complex component 2                                                                      | Ssc.1468.1.S1_at     | -1.55 q < 0                 | -1.53 q < 0.0146        | -1.74 q < 0.000246         | -1.45 q < 0.0372        | -1.56 q < 0.0113         | -1.48 q < 0.0312         |
| FAM105B   | family with sequence similarity 105, member B                                                    | Ssc.31074.1.A1_at    | -1.37 q < 0                 | -1.31 q < 0.00722       | -1.44 q < 0.0000526        | -1.37 q < 0.000741      | -1.39 q < 0.000503       | -1.32 q < 0.00629        |
| FAM105B   | family with sequence similarity 105, member B                                                    | Ssc.25709.1.A1_at    | -1.14 q < 0.0135            | -1.16 q < 0.852         | -1.27 q < 0.157            | -1.07 q < 0.738         | -1.12 q < 1              | -1.09 q < 1              |
| FAM118A   | family with sequence similarity 118, member A                                                    | Ssc.2869.1.S1_at     | -1.56 q < 0                 | -1.38 q < 0.00241       | -1.61 q < 0.000000398      | -1.58 q < 0.000001      | -1.52 q < 0.0000206      | -1.74 q < 0.0000000484   |
| GRN       | granulin                                                                                         | Ssc.20986.2.S1_at    | -2.12 q < 0                 | -2.1 q < 0.000000266    | -2.93 q < 0                | -1.84 q < 0.000232      | -1.89 q < 0.000188       | -2 q < 0.0000135         |
| HLA-B     | major histocompatibility complex, class I, B                                                     | Ssc.18553.1.S1_at    | 1.65 q < 0                  | 1.69 q < 0.00000198     | 1.6 q < 0.0000039          | 1.46 q < 0.00266        | 1.46 q < 0.00335         | 2.12 q < 0               |
| HLA-B     | major histocompatibility complex, class I, B                                                     | Ssc.13780.12.S1_x_at | 1.76 q < 0.0000000246       | 1.69 q < 0.229          | 1.92 q < 0.0449            | 1.55 q < 0.246          | 2.34 q < 0.00367         | 1.45 q < 0.747           |
| HLA-B     | major histocompatibility complex, class I, B                                                     | Ssc.13780.12.S1_a_at | 1.6 q < 0.00312             | 1.79 q < 0.527          | 2.2 q < 0.126              | 1.37 q < 0.611          | 1.89 q < 0.686           | 1.03 q < 1               |
| HLA-B     | major histocompatibility complex, class I, B                                                     | Ssc.13780.6.S1_a_at  | -1.28 q < 0.0193            | -1.47 q < 0.432         | -1.38 q < 0.521            | -1.06 q < 0.901         | -1.33 q < 1              | -1.19 q < 1              |
| HNRNP2    | heterogeneous nuclear ribonucleoprotein H2 (H')                                                  | Ssc.3216.2.A1_at     | -1.89 q < 0                 | -2.46 q < 0             | -1.96 q < 0.0000000702     | -1.62 q < 0.000135      | -1.83 q < 0.000000575    | -1.67 q < 0.0000336      |
| HNRNP2    | heterogeneous nuclear ribonucleoprotein H2 (H')                                                  | Ssc.3216.1.A1_at     | -1.29 q < 0.000126          | -1.32 q < 0.399         | -1.49 q < 0.0441           | -1.01 q < 0.969         | -1.35 q < 0.495          | -1.3 q < 0.515           |
| IAH1      | isoamyl acetate-hydrolyzing esterase 1 homolog (S. cerevisiae)                                   | Ssc.2629.1.S1_at     | -1.52 q < 0                 | -1.44 q < 0.0285        | -1.56 q < 0.00271          | -1.48 q < 0.0106        | -1.61 q < 0.00115        | -1.49 q < 0.0101         |
| KCND3     | potassium voltage-gated channel, Shal-related subfamily, member 3                                | Ssc.1445.1.S1_at     | -1.46 q < 0                 | -1.52 q < 0.0000836     | -1.55 q < 0.00003          | -1.44 q < 0.000784      | -1.39 q < 0.00719        | -1.41 q < 0.00271        |
| PCDH15    | protocadherin-related 15                                                                         | Ssc.30063.1.A1_at    | -2.75 q < 0                 | -2.39 q < 0.000198      | -2.56 q < 0.0000374        | -3.09 q < 0.000000178   | -4.35 q < 0.000000000179 | -1.93 q < 0.0142         |
| PXDN      | peroxidasin homolog (Drosophila)                                                                 | Ssc.3128.1.A1_at     | -1.88 q < 0                 | -1.73 q < 0.000716      | -2.06 q < 0.00000105       | -1.75 q < 0.000409      | -1.75 q < 0.000733       | -2.16 q < 0.0000000954   |
| RAB18     | RAB18, member RAS oncogene family                                                                | Ssc.6119.1.A1_at     | -1.74 q < 0                 | -1.85 q < 0.00000159    | -1.86 q < 0.00000125       | -1.69 q < 0.0000784     | -1.43 q < 0.05           | -1.92 q < 0.000000196    |
| RAB18     | RAB18, member RAS oncogene family                                                                | Ssc.3766.1.S1_at     | -1.35 q < 0.000000000000369 | -1.42 q < 0.00289       | -1.45 q < 0.00126          | -1.23 q < 0.145         | -1.23 q < 0.519          | -1.46 q < 0.000744       |
| RBMS3     | RNA binding motif, single stranded interacting protein 3                                         | Ssc.12996.1.A1_at    | 2.16 q < 0                  | 1.47 q < 0.0259         | 1.52 q < 0.00891           | 3.15 q < 0              | 3.18 q < 0               | 2.08 q < 0.0000000168    |
| SLC12A1   | solute carrier family 12 (sodium/potassium/chloride transporters), member 1                      | Ssc.10238.1.A1_at    | -1.51 q < 0                 | -1.48 q < 0.0000507     | -1.59 q < 0.000000714      | -1.34 q < 0.00682       | -1.67 q < 0.0000000178   | -1.5 q < 0.000022        |
| SLC16A1   | solute carrier family 16, member 1 (monocarboxylic acid transporter 1)                           | Ssc.20473.2.S1_at    | -1.55 q < 0                 | -1.64 q < 0.000162      | -1.43 q < 0.0223           | -1.45 q < 0.0118        | -1.79 q < 0.00000404     | -1.48 q < 0.00808        |
| SLC25A17  | solute carrier family 25 (mitochondrial carrier; peroxisomal membrane protein, 34kDa), member 17 | Ssc.4477.1.S1_at     | -2.07 q < 0                 | -1.85 q < 0.00104       | -2.21 q < 0.00000346       | -2.08 q < 0.0000243     | -1.94 q < 0.000353       | -2.33 q < 0.000000307    |
| TACC1     | transforming, acidic coiled-coil containing protein 1                                            | Ssc.28305.1.A1_at    | 2.29 q < 0                  | 2.27 q < 0              | 1.72 q < 0.00000229        | 2.6 q < 0               | 2.6 q < 0                | 2.39 q < 0               |
| TACC1     | transforming, acidic coiled-coil containing protein 1                                            | Ssc.7712.1.A1_at     | -1.72 q < 0.00000313        | -1.58 q < 0.536         | -1.99 q < 0.0725           | -1.51 q < 0.353         | -2.13 q < 0.0587         | -1.47 q < 0.86           |
| XIST      | X (inactive)-specific transcript (non-protein coding)                                            | Ssc.31029.1.A1_at    | -7.15 q < 0                 | -8.29 q < 0.0000000227  | -8.94 q < 0.0000000702     | -3.96 q < 0.00127       | -9.23 q < 0.00000000418  | -6.91 q < 0.000000413    |
| XIST      | X (inactive)-specific transcript (non-protein coding)                                            | Ssc.2434.1.A1_at     | -1.65 q < 0                 | -1.95 q < 0.00000000076 | -1.81 q < 0.0000000826     | -1.37 q < 0.0217        | -1.72 q < 0.00000224     | -1.48 q < 0.00212        |
| XIST      | X (inactive)-specific transcript (non-protein coding)                                            | Ssc.13426.1.A1_at    | -2.35 q < 0.000000000000191 | -3.7 q < 0.00000531     | -2.95 q < 0.00044          | -1.51 q < 0.375         | -2.39 q < 0.0167         | -1.82 q < 0.234          |
| A2M       | alpha-2-macroglobulin                                                                            | Ssc.16603.1.A1_at    | -2.29 q < 0                 | -2.31 q < 0.00124       | -2.63 q < 0.00000743       | -2.77 q < 0.0000176     | -1.81 q < 0.115          | -2.07 q < 0.00882        |
| A2M       | alpha-2-macroglobulin                                                                            | Ssc.26317.1.S1_at    | -1.63 q < 0.0396            | -2.19 q < 0.515         | -2.12 q < 0.452            | -1.66 q < 0.53          | -1.04 q < 1              | -1.4 q < 1               |
| C20orf108 | chromosome 20 open reading frame 108                                                             | Ssc.19192.2.A1_at    | -1.41 q < 0                 | 1.05 q < 1              | -1.95 q < 0.00000000000352 | -1.37 q < 0.0107        | -1.52 q < 0.000288       | -1.45 q < 0.00154        |
| DYNLL2    | dynein, light chain, LC8-type 2                                                                  | Ssc.12207.1.A1_at    | 1.36 q < 0                  | 1.46 q < 0.000489       | 1.34 q < 0.0188            | 1.3 q < 0.0391          | 1.3 q < 0.0832           | 1.43 q < 0.00105         |
| FMN1      | formin 1                                                                                         | Ssc.12769.1.A1_at    | 2.12 q < 0                  | 1.06 q < 1              | 2.8 q < 0                  | 2.43 q < 0.000000000382 | 2.33 q < 0.000000000356  | 2.52 q < 0.0000000000234 |

| Gene Name | Gene Description                                                | Probe Set ID        | Breed MS-WC                 | Day 25 MS-WC           | Day 45 MS-WC               | Day 65 MS-WC          | Day 85 MS-WC               | Day 105 MS-WC              |
|-----------|-----------------------------------------------------------------|---------------------|-----------------------------|------------------------|----------------------------|-----------------------|----------------------------|----------------------------|
| IL2RG     | interleukin 2 receptor, gamma                                   | Ssc.15739.1.S1_at   | -1.8 q < 0                  | -1.09 q < 1            | -1.72 q < 0.00558          | -1.67 q < 0.0089      | 0.00000000000179           | -1.96 q < 0.000121         |
| KIT       | v-kit Hardy-Zuckerman 4 feline sarcoma viral oncogene homolog   | Ssc.16096.2.S1_a_at | -1.48 q < 0                 | -1.55 q < 0.000664     | -1.38 q < 0.0335           | -1.32 q < 0.0689      | -1.76 q < 0.0000182        | -1.43 q < 0.0119           |
| MANEA     | mannosidase, endo-alpha                                         | Ssc.8193.1.A1_at    | -1.6 q < 0                  | -1.34 q < 0.255        | -1.51 q < 0.0178           | -1.83 q < 0.0000295   | -1.65 q < 0.00238          | -1.7 q < 0.000583          |
| PSMC1     | proteasome (prosome, macropain) 26S subunit, ATPase, 1          | Ssc.1911.1.A1_at    | -1.46 q < 0                 | -1.16 q < 0.927        | -1.54 q < 0.00145          | -1.49 q < 0.0034      | -1.44 q < 0.0225           | -1.7 q < 0.0000202         |
| SNX9      | sorting nexin 9                                                 | Ssc.15467.2.A1_at   | 1.52 q < 0                  | 1.69 q < 0.00000295    | 1.31 q < 0.0824            | 1.65 q < 0.0000108    | 1.54 q < 0.000434          | 1.43 q < 0.00637           |
| SNX9      | sorting nexin 9                                                 | Ssc.15467.1.A1_at   | 1.39 q < 0.0000000197       | 1.71 q < 0.000208      | 1.39 q < 0.0834            | 1.36 q < 0.0931       | 1.29 q < 0.607             | 1.26 q < 0.541             |
| SNX9      | sorting nexin 9                                                 | Ssc.24257.1.S1_at   | -1.07 q < 0.497             | -1.48 q < 0.00832      | 1.02 q < 0.983             | -1.01 q < 0.98        | -1.02 q < 1                | 1.05 q < 1                 |
| TBX1      | T-box 1                                                         | Ssc.13166.1.A1_at   | -1.38 q < 0                 | -1.35 q < 0.0365       | -1.39 q < 0.00928          | -1.33 q < 0.0291      | -1.54 q < 0.00018          | -1.3 q < 0.0894            |
| UPRT      | uracil phosphoribosyltransferase (FUR1) homolog (S. cerevisiae) | Ssc.10699.1.A1_at   | -1.6 q < 0                  | -1.19 q < 0.751        | 0.00000000000143           | -1.72 q < 0.0000939   | -1.6 q < 0.000434          | -1.47 q < 0.0067           |
| LSM3      | LSM3 homolog, U6 small nuclear RNA associated (S. cerevisiae)   | Ssc.1234.1.S1_at    | -1.44 q < 0.000000000000878 | -1.46 q < 0.0149       | -1.48 q < 0.0104           | -1.47 q < 0.00856     | -1.19 q < 1                | -1.64 q < 0.000184         |
| ARMCX1    | armadillo repeat containing, X-linked 1                         | Ssc.5616.1.S1_at    | -1.41 q < 0.00000000000134  | -1.47 q < 0.00521      | -1.41 q < 0.0195           | -1.41 q < 0.014       | -1.37 q < 0.0756           | -1.37 q < 0.0491           |
| SLC46A3   | solute carrier family 46, member 3                              | Ssc.6055.1.A1_at    | 1.45 q < 0.0000000000026    | -1.04 q < 1            | 1.63 q < 0.000739          | 1.54 q < 0.00346      | 1.55 q < 0.00602           | 1.73 q < 0.0000614         |
| SLC46A3   | solute carrier family 46, member 3                              | Ssc.23758.1.S1_at   | 1.29 q < 0.0000000979       | -1.04 q < 1            | 1.42 q < 0.0131            | 1.43 q < 0.00663      | 1.36 q < 0.0745            | 1.34 q < 0.062             |
| SLC46A3   | solute carrier family 46, member 3                              | Ssc.23758.2.A1_at   | 1.17 q < 0.00131            | -1.08 q < 1            | 1.27 q < 0.177             | 1.33 q < 0.0389       | 1.16 q < 1                 | 1.23 q < 0.41              |
| SH3BGRL   | SH3 domain binding glutamic acid-rich protein like              | Ssc.7229.1.S1_at    | -1.53 q < 0.00000000000268  | -1.32 q < 0.381        | -1.65 q < 0.00359          | -1.48 q < 0.0348      | -1.61 q < 0.0105           | -1.6 q < 0.00808           |
| SH3BGRL   | SH3 domain binding glutamic acid-rich protein like              | Ssc.7229.3.S1_at    | -1.11 q < 0.00888           | -1.13 q < 0.68         | -1.14 q < 0.5              | -1.09 q < 0.548       | -1.09 q < 1                | -1.1 q < 1                 |
| KIAA1370  | KIAA1370                                                        | Ssc.14101.1.A1_at   | -1.26 q < 0.00000000000314  | -1.07 q < 1            | -1.31 q < 0.00344          | -1.27 q < 0.0142      | -1.4 q < 0.000129          | -1.27 q < 0.0179           |
| KIAA1370  | KIAA1370                                                        | Ssc.10620.1.A1_at   | -1.13 q < 0.037             | -1.2 q < 0.617         | -1.07 q < 0.923            | -1.1 q < 0.667        | -1.22 q < 0.815            | -1.08 q < 1                |
| SERPINB1  | serpin peptidase inhibitor, clade B (ovalbumin), member 1       | Ssc.1303.1.S1_at    | -1.46 q < 0.00000000000169  | 1.05 q < 1             | -1.76 q < 0.000117         | -1.58 q < 0.00324     | -1.61 q < 0.00387          | -1.56 q < 0.00637          |
| TIAM1     | T-cell lymphoma invasion and metastasis 1                       | Ssc.27360.1.A1_at   | -1.17 q < 0.000022          | -1.19 q < 0.302        | -1.27 q < 0.0297           | -1.4 q < 0.000218     | -1.31 q < 0.0142           | 1.27 q < 0.0366            |
| CNTF      | ciliary neurotrophic factor                                     | Ssc.10473.1.A1_at   | 1.67 q < 0                  | 1.81 q < 0.000155      | 1.41 q < 0.118             | 2.21 q < 0.0000000443 | 1.45 q < 0.126             | 1.61 q < 0.00641           |
| CSTB      | cystatin B (stefin B)                                           | Ssc.17323.1.S1_at   | -1.76 q < 0                 | -1.52 q < 0.102        | -1.77 q < 0.00379          | -2.09 q < 0.0000207   | -1.53 q < 0.126            | -1.97 q < 0.000141         |
| HUS1      | HUS1 checkpoint homolog (S. pombe)                              | Ssc.21138.1.S1_at   | -1.45 q < 0                 | -1.12 q < 1            | -1.87 q < 0.00000000276    | -1.12 q < 0.547       | -1.53 q < 0.000343         | -1.74 q < 0.000000152      |
| HUS1      | HUS1 checkpoint homolog (S. pombe)                              | Ssc.31013.1.A1_s_at | -1.31 q < 0                 | 1.1 q < 1              | -1.77 q < 0.00000000000429 | -1.09 q < 0.552       | -1.48 q < 0.0000143        | -1.46 q < 0.0000204        |
| IGHM      | immunoglobulin heavy constant mu                                | Ssc.24103.1.A1_s_at | -2.82 q < 0                 | -1.75 q < 0.167        | -3.4 q < 0.0000000925      | -1.85 q < 0.0545      | -2.94 q < 0.0000447        | -5.45 q < 0                |
| IGHM      | immunoglobulin heavy constant mu                                | Ssc.15945.1.A1_x_at | 1.34 q < 0.00000000000207   | 1.42 q < 0.00542       | 1.3 q < 0.0834             | 1.23 q < 0.194        | 1.3 q < 0.146              | 1.47 q < 0.00136           |
| IGHM      | immunoglobulin heavy constant mu                                | Ssc.13778.1.S1_at   | -2.24 q < 0                 | 1.01 q < 1             | -1.03 q < 0.977            | 1.24 q < 0.208        | -1.09 q < 1                | -63.01 q < 0               |
| IGHM      | immunoglobulin heavy constant mu                                | Ssc.11190.1.S1_at   | -1.59 q < 0.00000000426     | -1.02 q < 1            | -1.15 q < 0.894            | -1.22 q < 0.565       | 1.01 q < 1                 | -7.28 q < 0                |
| IGHM      | immunoglobulin heavy constant mu                                | Ssc.11070.1.S1_at   | -1.26 q < 0.00000005        | -1.02 q < 1            | 1.01 q < 0.991             | 1.02 q < 0.931        | 1.01 q < 1                 | -3.31 q < 0                |
| IGHM      | immunoglobulin heavy constant mu                                | Ssc.7706.1.A1_at    | -1.1 q < 0.0933             | -1.05 q < 1            | 1.06 q < 0.923             | 1.14 q < 0.494        | -2.04 q < 0.00000000000306 | 1.07 q < 1                 |
| IL1RAPL1  | interleukin 1 receptor accessory protein-like 1                 | Ssc.18626.1.A1_at   | -1.41 q < 0                 | -1.14 q < 0.536        | -1.2 q < 0.134             | -1.5 q < 0.0000000255 | -1.65 q < 0.00000000000321 | -1.65 q < 0.00000000000157 |
| RABIF     | RAB interacting factor                                          | Ssc.22533.1.A1_at   | -1.31 q < 0                 | -1.3 q < 0.0129        | -1.47 q < 0.0000108        | -1.23 q < 0.0715      | -1.44 q < 0.0000605        | -1.12 q < 0.93             |
| TCF4      | transcription factor 4                                          | Ssc.1745.1.A1_at    | -2.04 q < 0                 | -4 q < 0               | -1.07 q < 0.954            | -2.53 q < 0.00000355  | -2.51 q < 0.00000691       | -1.29 q < 0.958            |
| TCF4      | transcription factor 4                                          | Ssc.28646.1.A1_at   | -1.55 q < 0.00000000000145  | -1.83 q < 0.000489     | -1.71 q < 0.00344          | -1.56 q < 0.024       | -1.47 q < 0.174            | -1.25 q < 0.862            |
| TCF4      | transcription factor 7-like 2 (T-cell specific, HMG-box)        | Ssc.1745.1.A1_at    | -2.04 q < 0                 | -4 q < 0               | -1.07 q < 0.954            | -2.53 q < 0.00000355  | -2.51 q < 0.00000691       | -1.29 q < 0.958            |
| TCF4      | transcription factor 7-like 2 (T-cell specific, HMG-box)        | Ssc.28646.1.A1_at   | -1.55 q < 0.00000000000145  | -1.83 q < 0.000489     | -1.71 q < 0.00344          | -1.56 q < 0.024       | -1.47 q < 0.174            | -1.25 q < 0.862            |
| CMTM3     | CKLF-like MARVEL transmembrane domain containing 3              | Ssc.25175.2.S1_at   | -1.51 q < 0.000000000000191 | -2.04 q < 0.0000000733 | -1.49 q < 0.0178           | -1.34 q < 0.118       | -1.47 q < 0.0421           | -1.29 q < 0.384            |

| Gene Name | Gene Description                                                        | Probe Set ID        | Breed MS-WC                 | Day 25 MS-WC       | Day 45 MS-WC          | Day 65 MS-WC          | Day 85 MS-WC         | Day 105 MS-WC         |
|-----------|-------------------------------------------------------------------------|---------------------|-----------------------------|--------------------|-----------------------|-----------------------|----------------------|-----------------------|
| CMTM3     | CKLF-like MARVEL transmembrane domain containing 3                      | Ssc.25175.3.S1_at   | -1.42 q < 0.000000000865    | -1.71 q < 0.000482 | -1.56 q < 0.00744     | -1.46 q < 0.0307      | -1.23 q < 1          | -1.22 q < 0.87        |
| CMTM3     | CKLF-like MARVEL transmembrane domain containing 3                      | Ssc.25175.1.S1_at   | 1.35 q < 0.00000269         | 1.74 q < 0.000187  | 1.05 q < 0.956        | 1.31 q < 0.173        | 1.45 q < 0.07        | 1.27 q < 0.555        |
| COLEC11   | collectin sub-family member 11                                          | Ssc.4688.2.A1_a_at  | -1.7 q < 0.000000000000191  | -1.27 q < 0.808    | -2.38 q < 0.000000953 | -2.04 q < 0.000116    | -1.66 q < 0.0408     | -1.41 q < 0.358       |
| LBP       | lipopolysaccharide binding protein                                      | Ssc.15980.1.S1_at   | 1.53 q < 0.000000000000191  | -1.04 q < 1        | 1.15 q < 0.812        | 2.4 q < 0.00000000132 | 2.12 q < 0.000000106 | 1.48 q < 0.0343       |
| TIMM22    | translocase of inner mitochondrial membrane 22 homolog (yeast)          | Ssc.1157.1.S1_at    | -1.35 q < 0.000000000000191 | -1.22 q < 0.323    | -1.43 q < 0.00142     | -1.28 q < 0.0598      | -1.47 q < 0.00065    | -1.38 q < 0.00637     |
| KIAA0774  | microtubule associated tumor suppressor candidate 2                     | Ssc.26369.1.S1_at   | 1.63 q < 0.000000000000369  | 1.45 q < 0.171     | 1.56 q < 0.0402       | 2.13 q < 0.00000631   | 1.71 q < 0.009       | 1.41 q < 0.252        |
| KIAA0774  | microtubule associated tumor suppressor candidate 2                     | Ssc.3936.1.S1_at    | 1.43 q < 0.000000000000268  | 1.16 q < 0.924     | 1.36 q < 0.0846       | 1.85 q < 0.00000925   | 1.63 q < 0.000352    | 1.25 q < 0.511        |
| KIAA0774  | microtubule associated tumor suppressor candidate 2                     | Ssc.26369.2.S1_at   | 1.24 q < 0.0002             | 1.14 q < 1         | 1.15 q < 0.796        | 1.55 q < 0.00335      | 1.3 q < 0.495        | 1.12 q < 1            |
| C14orf147 | chromosome 14 open reading frame 147                                    | Ssc.5692.1.S1_at    | 1.62 q < 0.000000000000102  | 1.33 q < 0.511     | 1.74 q < 0.00393      | 2.05 q < 0.0000212    | 1.89 q < 0.000487    | 1.23 q < 0.994        |
| RPS4X     | ribosomal protein S4, X-linked                                          | Ssc.14003.2.S1_at   | -1.5 q < 0.000000000000102  | -1.35 q < 0.217    | -1.71 q < 0.00037     | -1.35 q < 0.115       | -1.5 q < 0.0361      | -1.61 q < 0.00259     |
| RPS4X     | ribosomal protein S4, X-linked                                          | Ssc.13017.1.A1_at   | -1.15 q < 0.0181            | -1.06 q < 1        | -1.22 q < 0.442       | -1.06 q < 0.796       | -1.08 q < 1          | -1.35 q < 0.0843      |
| KIAA1755  | KIAA1755                                                                | Ssc.23015.1.S1_at   | -1.99 q < 0.000000000000165 | 1.01 q < 1         | -3.04 q < 0.00000423  | -2.27 q < 0.00197     | -2.72 q < 0.000105   | -1.67 q < 0.218       |
| C12orf45  | chromosome 12 open reading frame 45                                     | Ssc.21490.1.S1_a_at | -1.28 q < 0.000000000000176 | -1.12 q < 0.867    | -1.23 q < 0.0769      | -1.34 q < 0.00203     | -1.39 q < 0.000409   | -1.32 q < 0.0051      |
| C12orf45  | chromosome 12 open reading frame 45                                     | Ssc.21490.1.S1_at   | -1.11 q < 0.0122            | 1.02 q < 1         | -1.08 q < 0.853       | -1.2 q < 0.12         | -1.15 q < 0.921      | -1.14 q < 0.695       |
| DDX17     | DEAD (Asp-Glu-Ala-Asp) box polypeptide 17                               | Ssc.8674.1.A1_at    | -3.12 q < 0.000000000000176 | -2.59 q < 0.114    | -2.66 q < 0.0762      | -3.05 q < 0.0197      | -4.25 q < 0.00141    | -3.29 q < 0.014       |
| DDX17     | DEAD (Asp-Glu-Ala-Asp) box polypeptide 17                               | Ssc.30341.1.S1_at   | 1.24 q < 0.0000488          | 1.39 q < 0.0597    | 1.18 q < 0.616        | 1.12 q < 0.631        | 1.25 q < 0.731       | 1.29 q < 0.255        |
| AASDHPPT  | aminoadipate-semialdehyde dehydrogenase-phosphopantetheinyl transferase | Ssc.7455.1.A1_at    | 1.47 q < 0.00000000000021   | 1.5 q < 0.0148     | 1.36 q < 0.122        | 1.64 q < 0.000671     | 1.55 q < 0.009       | 1.32 q < 0.272        |
| AASDHPPT  | aminoadipate-semialdehyde dehydrogenase-phosphopantetheinyl transferase | Ssc.23863.1.S1_at   | -1.24 q < 0.00251           | -1.32 q < 0.459    | -1.27 q < 0.515       | -1.23 q < 0.428       | -1.21 q < 1          | -1.18 q < 1           |
| RALGAP1   | Ral GEF with PH domain and SH3 binding motif 1                          | Ssc.25517.1.S1_at   | -1.82 q < 0.00000000000026  | 1.03 q < 1         | -2.44 q < 0.0000477   | -2.52 q < 0.0000161   | -1.78 q < 0.0568     | -1.87 q < 0.0148      |
| TM9SF2    | transmembrane 9 superfamily member 2                                    | Ssc.26464.1.A1_at   | 1.47 q < 0.000000000000304  | 1.21 q < 0.803     | 1.28 q < 0.325        | 1.66 q < 0.000509     | 1.7 q < 0.000343     | 1.56 q < 0.00479      |
| SLC12A8   | solute carrier family 12 (potassium/chloride transporters), member 8    | Ssc.10023.1.A1_at   | 1.36 q < 0.000000000000473  | 1.39 q < 0.0149    | 1.48 q < 0.00145      | 1.12 q < 0.547        | 1.1 q < 1            | 1.82 q < 0.0000000984 |
| DLG1      | discs, large homolog 1 (Drosophila)                                     | Ssc.10952.1.S1_at   | 1.46 q < 0.00000000000091   | 1.07 q < 1         | 1.34 q < 0.172        | 1.93 q < 0.00000134   | 1.62 q < 0.00213     | 1.46 q < 0.0301       |
| DLG1      | discs, large homolog 1 (Drosophila)                                     | Ssc.30931.1.A1_at   | -1.17 q < 0.0154            | -1.18 q < 0.925    | -1.19 q < 0.654       | -1.11 q < 0.676       | -1.15 q < 1          | -1.24 q < 0.666       |
| DLG1      | discs, large (Drosophila) homolog-associated protein 5                  | Ssc.10952.1.S1_at   | 1.46 q < 0.00000000000091   | 1.07 q < 1         | 1.34 q < 0.172        | 1.93 q < 0.00000134   | 1.62 q < 0.00213     | 1.46 q < 0.0301       |
| DLG1      | discs, large (Drosophila) homolog-associated protein 5                  | Ssc.30931.1.A1_at   | -1.17 q < 0.0154            | -1.18 q < 0.925    | -1.19 q < 0.654       | -1.11 q < 0.676       | -1.15 q < 1          | -1.24 q < 0.666       |
| PKIB      | protein kinase (cAMP-dependent, catalytic) inhibitor beta               | Ssc.11036.1.S1_at   | -1.54 q < 0.000000000000137 | -1.6 q < 0.0179    | -1.45 q < 0.103       | -1.91 q < 0.0000771   | -1.28 q < 1          | -1.54 q < 0.0369      |
| MAP4K4    | mitogen-activated protein kinase kinase kinase 4                        | Ssc.21192.3.S1_at   | -1.43 q < 0.000000000000163 | -1.27 q < 0.385    | -1.57 q < 0.00218     | -1.46 q < 0.0145      | -1.33 q < 0.311      | -1.52 q < 0.00626     |
| BEX5      | brain expressed, X-linked 5                                             | Ssc.2607.1.S1_at    | 1.33 q < 0.000000000000199  | 1.02 q < 1         | 1.5 q < 0.000392      | 1.61 q < 0.0000789    | 1.41 q < 0.00753     | 1.21 q < 0.483        |
| SF1       | splicing factor 1                                                       | Ssc.30179.1.A1_at   | -1.47 q < 0.000000000000201 | -1.72 q < 0.000457 | -1.39 q < 0.109       | 1 q < 0.991           | -1.77 q < 0.000199   | -1.63 q < 0.00232     |
| ACOX3     | acyl-CoA oxidase 3, pristanoyl                                          | Ssc.7981.1.A1_at    | 1.48 q < 0.000000000000232  | 1.59 q < 0.00656   | 1.56 q < 0.0106       | 1.5 q < 0.0209        | 1.34 q < 0.454       | 1.42 q < 0.0911       |
| RCN1      | reticulocalbin 1, EF-hand calcium binding domain                        | Ssc.7715.1.A1_at    | -1.78 q < 0.000000000000341 | -1.53 q < 0.314    | -2.06 q < 0.00344     | -1.71 q < 0.0487      | -1.68 q < 0.161      | -1.98 q < 0.00695     |
| NP_057359 | -                                                                       | Ssc.8455.1.A1_at    | -1.43 q < 0.000000000000366 | -1.46 q < 0.0285   | -1.54 q < 0.00558     | -1.41 q < 0.0415      | -1.44 q < 0.0556     | -1.31 q < 0.288       |
| NP_057359 | -                                                                       | Ssc.6767.1.S1_at    | 1.13 q < 0.202              | -1.03 q < 1        | -1.25 q < 0.579       | -1.04 q < 0.917       | 1.52 q < 0.094       | 1.65 q < 0.00926      |

| Gene Name | Gene Description                                      | Probe Set ID        | Breed MS-WC              | Day 25 MS-WC      | Day 45 MS-WC         | Day 65 MS-WC         | Day 85 MS-WC       | Day 105 MS-WC       |
|-----------|-------------------------------------------------------|---------------------|--------------------------|-------------------|----------------------|----------------------|--------------------|---------------------|
| PCCA      | propionyl CoA carboxylase, alpha polypeptide          | Ssc.10223.1.A1_at   | -1.42 q < 0.000000000527 | -1.08 q < 1       | -1.8 q < 0.00000978  | -1.5 q < 0.00692     | -1.6 q < 0.00177   | -1.22 q < 0.732     |
| PCNT      | pericentrin                                           | Ssc.6277.1.A1_at    | -1.29 q < 0.000000000717 | -1.23 q < 0.217   | -1.49 q < 0.000612   | -1.35 q < 0.00514    | -1.31 q < 0.0376   | -1.08 q < 1         |
| TGFB1     | transforming growth factor, beta-induced, 68kDa       | Ssc.16671.1.S1_at   | -1.65 q < 0.000000000905 | -1.86 q < 0.00541 | -1.61 q < 0.07       | -1.66 q < 0.0325     | -1.4 q < 0.747     | -1.76 q < 0.0154    |
| PKD2      | polycystic kidney disease 2 (autosomal dominant)      | Ssc.840.1.A1_at     | 1.39 q < 0.00000000011   | 1.19 q < 0.789    | 1.52 q < 0.00385     | 1.7 q < 0.0000438    | 1.06 q < 1         | 1.6 q < 0.000666    |
| PKD2      | protein kinase D2                                     | Ssc.840.1.A1_at     | 1.39 q < 0.00000000011   | 1.19 q < 0.789    | 1.52 q < 0.00385     | 1.7 q < 0.0000438    | 1.06 q < 1         | 1.6 q < 0.000666    |
| CHI3L1    | chitinase 3-like 1 (cartilage glycoprotein-39)        | Ssc.90.1.S1_at      | 2.7 q < 0.000000000141   | 1.11 q < 1        | 4.71 q < 0.000112    | 4.79 q < 0.0000726   | 3.23 q < 0.016     | 1.76 q < 0.768      |
| MYO5A     | myosin VA (heavy chain 12, myosin)                    | Ssc.6843.1.A1_at    | 1.37 q < 0.000000000147  | 1.13 q < 1        | 1.56 q < 0.000939    | 1.74 q < 0.0000609   | 1.48 q < 0.00838   | 1.07 q < 1          |
| MYO5A     | myosin VA (heavy chain 12, myosin)                    | Ssc.1957.1.A1_at    | 1.19 q < 0.00353         | -1.02 q < 1       | 1.32 q < 0.163       | 1.47 q < 0.0103      | 1.31 q < 0.389     | -1.05 q < 1         |
| BAZ2B     | bromodomain adjacent to zinc finger domain, 2B        | Ssc.28060.1.A1_at   | 1.33 q < 0.000000000483  | 1.33 q < 0.0811   | 1.36 q < 0.0339      | -1.02 q < 0.933      | 1.49 q < 0.00227   | 1.58 q < 0.0000798  |
| PTP4A2    | protein tyrosine phosphatase type IVA, member 2       | Ssc.11158.1.A1_at   | -1.36 q < 0.000000000639 | -1.52 q < 0.00255 | -1.45 q < 0.0124     | -1.38 q < 0.0324     | -1.25 q < 0.686    | -1.22 q < 0.603     |
| ESD       | esterase D                                            | Ssc.217.1.S1_at     | -1.38 q < 0.000000000824 | -1.04 q < 1       | -1.49 q < 0.011      | -1.25 q < 0.251      | -1.52 q < 0.00909  | -1.73 q < 0.0000377 |
| STXBP1    | syntaxin binding protein 1                            | Ssc.6797.1.S1_at    | 1.5 q < 0.000000000997   | 1.33 q < 0.443    | 1.89 q < 0.000212    | 1.57 q < 0.0217      | 1.78 q < 0.00212   | 1.06 q < 1          |
| ATP9A     | ATPase, class II, type 9A                             | Ssc.3410.2.S1_a_at  | -1.36 q < 0.000000000999 | -1.16 q < 0.913   | -1.4 q < 0.0337      | -1.43 q < 0.0145     | -1.51 q < 0.00528  | -1.31 q < 0.167     |
| ATP9A     | ATPase, class II, type 9A                             | Ssc.3410.1.S1_a_at  | -1.15 q < 0.0119         | -1.05 q < 1       | -1.15 q < 0.67       | -1.19 q < 0.349      | -1.25 q < 0.519    | -1.11 q < 1         |
| C20orf27  | chromosome 20 open reading frame 27                   | Ssc.3560.3.A1_at    | -1.28 q < 0.000000000118 | -1.27 q < 0.124   | -1.32 q < 0.032      | -1.36 q < 0.00896    | -1.35 q < 0.026    | -1.14 q < 0.957     |
| CLOCK     | clock homolog (mouse)                                 | Ssc.24285.1.S1_at   | -1.29 q < 0.000000000264 | -1.21 q < 0.399   | -1.39 q < 0.0067     | -1.32 q < 0.0325     | -1.35 q < 0.0309   | -1.17 q < 0.716     |
| CLOCK     | clock homolog (mouse)                                 | Ssc.4897.1.A1_at    | -1.85 q < 0.0000377      | -2.05 q < 0.261   | -2.16 q < 0.147      | -1.01 q < 0.988      | -2.4 q < 0.123     | -2.03 q < 0.293     |
| TCP1      | t-complex 1                                           | Ssc.4426.1.S1_at    | 1.58 q < 0.000000000431  | 1.82 q < 0.00746  | 1.11 q < 0.922       | 1.9 q < 0.00227      | 1.52 q < 0.302     | 1.66 q < 0.0449     |
| TCP1      | t-complex 1                                           | Ssc.4426.2.S1_at    | 1.42 q < 0.000131        | 1.75 q < 0.0572   | 1.01 q < 0.997       | 1.73 q < 0.0382      | 1.51 q < 0.547     | 1.26 q < 1          |
| MGST1     | microsomal glutathione S-transferase 1                | Ssc.1013.1.A1_at    | -2.12 q < 0.000000000464 | -1.14 q < 1       | -2.33 q < 0.0389     | -4.31 q < 0.00000398 | -2.42 q < 0.0459   | -1.57 q < 0.838     |
| A2ML1     | alpha-2-macroglobulin-like 1                          | Ssc.9422.1.A1_at    | 1.22 q < 0.000000000499  | 1 q < 1           | 1.36 q < 0.000749    | 1.3 q < 0.00453      | 1.16 q < 0.72      | 1.3 q < 0.00674     |
| MAP3K7    | mitogen-activated protein kinase kinase kinase 7      | Ssc.10311.2.A1_at   | 1.24 q < 0.000000000683  | 1.16 q < 0.595    | 1.18 q < 0.311       | 1.27 q < 0.0349      | 1.32 q < 0.0142    | 1.27 q < 0.0451     |
| MAP3K7    | mitogen-activated protein kinase kinase kinase 7      | Ssc.24116.1.A1_at   | 1.11 q < 0.0216          | 1.2 q < 0.34      | 1.02 q < 0.986       | 1.2 q < 0.181        | 1.04 q < 1         | 1.12 q < 1          |
| EDNRB     | endothelin receptor type B                            | Ssc.3295.2.A1_at    | -2.49 q < 0.000000000882 | -3.01 q < 0.0275  | -4.27 q < 0.000628   | -2.69 q < 0.0424     | -1.54 q < 1        | -1.79 q < 0.752     |
| EDNRB     | endothelin receptor type B                            | Ssc.3295.1.S1_at    | -1.29 q < 0.0466         | -2.02 q < 0.0285  | -1.35 q < 0.711      | -1.43 q < 0.38       | -1.23 q < 1        | 1.33 q < 1          |
| FRYL      | FRY-like                                              | Ssc.14247.2.A1_at   | 1.48 q < 0.000000000194  | 1.75 q < 0.00387  | -1.02 q < 0.989      | 1.59 q < 0.0242      | 2.15 q < 0.0000126 | 1.2 q < 1           |
| EIF3D     | eukaryotic translation initiation factor 3, subunit D | Ssc.6735.1.A1_at    | -1.21 q < 0.000000000376 | 1.11 q < 0.897    | -1.51 q < 0.00000181 | -1.33 q < 0.00284    | -1.13 q < 1        | -1.29 q < 0.0154    |
| EIF3D     | eukaryotic translation initiation factor 3, subunit D | Ssc.11296.1.A1_at   | -1.26 q < 0.000000000641 | -1.21 q < 0.228   | -1.3 q < 0.0232      | -1.16 q < 0.303      | -1.38 q < 0.00229  | -1.25 q < 0.0817    |
| Q9H6J2    | -                                                     | Ssc.4917.2.S1_a_at  | 1.29 q < 0.000000000742  | 1.1 q < 1         | 1.47 q < 0.00395     | 1.45 q < 0.00411     | 1.4 q < 0.0353     | 1.1 q < 1           |
| Q9H6J2    | -                                                     | Ssc.4917.1.S1_at    | 1.13 q < 0.012           | -1.04 q < 1       | 1.14 q < 0.647       | 1.4 q < 0.0022       | 1.14 q < 1         | 1.04 q < 1          |
| KCTD3     | potassium channel tetramerisation domain containing 3 | Ssc.21138.3.S1_a_at | -1.22 q < 0.000000000983 | 1.05 q < 1        | -1.45 q < 0.0000536  | -1.02 q < 0.918      | -1.39 q < 0.00116  | -1.35 q < 0.00288   |
| FAM73B    | family with sequence similarity 73, member B          | Ssc.19153.2.A1_at   | -1.23 q < 0.000000000197 | -1.11 q < 0.979   | -1.33 q < 0.00115    | -1.31 q < 0.0152     | -1.37 q < 0.00636  | -1.04 q < 1         |
| Q8N682    | -                                                     | Ssc.9726.1.A1_at    | -1.51 q < 0.000000000294 | -1.09 q < 1       | -1.21 q < 0.823      | -1.68 q < 0.0303     | -1.99 q < 0.00212  | -1.77 q < 0.0165    |
| PLA2G10   | phospholipase A2, group X                             | Ssc.1762.1.S1_at    | 1.19 q < 0.000000000457  | -1.02 q < 1       | 1 q < 0.997          | 1.28 q < 0.0298      | 1.31 q < 0.0216    | 1.46 q < 0.0000443  |
| PLA2G10   | phospholipase A2, group X                             | Ssc.22078.1.A1_at   | 1.48 q < 0.000565        | 1.16 q < 1        | 1.1 q < 0.95         | 1.62 q < 0.195       | 2.08 q < 0.04      | 1.63 q < 0.37       |
| PLA2G10   | phospholipase A2, group X                             | Ssc.1762.2.A1_at    | 1.11 q < 0.0293          | 1.01 q < 1        | 1.13 q < 0.658       | 1.21 q < 0.156       | 1.11 q < 1         | 1.09 q < 1          |
| GMDS      | GDP-mannose 4,6-dehydratase                           | Ssc.28503.1.S1_at   | -1.29 q < 0.00000583     | 1.24 q < 0.567    | -1.44 q < 0.0367     | -1.67 q < 0.000304   | -1.46 q < 0.0425   | -1.27 q < 0.456     |

| Gene Name | Gene Description                                                                         | Probe Set ID        | Breed MS-WC                | Day 25 MS-WC         | Day 45 MS-WC           | Day 65 MS-WC             | Day 85 MS-WC          | Day 105 MS-WC       |
|-----------|------------------------------------------------------------------------------------------|---------------------|----------------------------|----------------------|------------------------|--------------------------|-----------------------|---------------------|
| GMDS      | GDP-mannose 4,6-dehydratase                                                              | Ssc.8896.1.A1_at    | -1.13 q < 0.0188           | -1.19 q < 0.563      | -1.07 q < 0.917        | -1.12 q < 0.55           | -1.16 q < 1           | -1.12 q < 1         |
| GMDS      | GDP-mannose 4,6-dehydratase                                                              | Ssc.13360.1.A1_at   | -1.17 q < 0.0511           | -1.92 q < 0.000393   | -1.06 q < 0.954        | -1.06 q < 0.857          | 1.05 q < 1            | -1.06 q < 1         |
| POP1      | processing of precursor 1, ribonuclease P/MRP subunit (S. cerevisiae)                    | Ssc.23194.1.A1_at   | -1.17 q < 0.0000418        | -1.4 q < 0.000343    | -1.33 q < 0.00414      | -1.25 q < 0.0473         | -1.05 q < 1           | 1.14 q < 0.768      |
| POP1      | blood vessel epicardial substance                                                        | Ssc.23194.1.A1_at   | -1.17 q < 0.0000418        | -1.4 q < 0.000343    | -1.33 q < 0.00414      | -1.25 q < 0.0473         | -1.05 q < 1           | 1.14 q < 0.768      |
| POP1      | PYD (pyrin domain) containing 1                                                          | Ssc.23194.1.A1_at   | -1.17 q < 0.0000418        | -1.4 q < 0.000343    | -1.33 q < 0.00414      | -1.25 q < 0.0473         | -1.05 q < 1           | 1.14 q < 0.768      |
| CASP2     | caspase 2, apoptosis-related cysteine peptidase                                          | Ssc.9673.1.A1_at    | -1.48 q < 0.0000000000726  | -1.44 q < 0.0519     | -1.65 q < 0.000905     | -1.35 q < 0.0989         | -1.42 q < 0.095       | -1.58 q < 0.00318   |
| CAPZB     | capping protein (actin filament) muscle Z-line, beta                                     | Ssc.10297.3.S1_a_at | -1.41 q < 0.0000000000878  | -1.55 q < 0.000735   | -1.61 q < 0.000183     | -1.32 q < 0.0858         | -1.32 q < 0.202       | -1.3 q < 0.199      |
| CAPZB     | capping protein (actin filament) muscle Z-line, beta                                     | Ssc.10297.1.S1_at   | -1.42 q < 0.000000031      | -1.52 q < 0.0746     | -1.65 q < 0.0132       | -1.1 q < 0.759           | -1.33 q < 0.828       | -1.58 q < 0.0335    |
| ADA       | adenosine deaminase                                                                      | Ssc.11171.1.S1_at   | -1.58 q < 0.0000000000038  | 1.04 q < 1           | -1.47 q < 0.0932       | -2.54 q < 0.00000000243  | -1.29 q < 1           | -2.13 q < 0.0000029 |
| GATA3     | GATA binding protein 3                                                                   | Ssc.21354.2.S1_at   | -1.61 q < 0.00000000000632 | -1.18 q < 1          | -1.22 q < 0.715        | -2.16 q < 0.000000792    | -2.34 q < 0.000000776 | -1.49 q < 0.128     |
| GATA3     | GATA binding protein 3                                                                   | Ssc.21354.1.S1_at   | -1.24 q < 0.00854          | -1.15 q < 1          | -1.33 q < 0.434        | -1.32 q < 0.305          | -1.25 q < 1           | -1.16 q < 1         |
| Q9UI52    | -                                                                                        | Ssc.14086.1.A1_at   | 1.51 q < 0.00000000000949  | -1.24 q < 0.772      | 2.04 q < 0.00000157    | 2.36 q < 0.0000000192    | 1.41 q < 0.222        | 1.43 q < 0.102      |
| RPS19BP1  | ribosomal protein S19 binding protein 1                                                  | Ssc.3542.1.S1_at    | -1.3 q < 0.00000000000103  | -1.14 q < 0.773      | -1.44 q < 0.000419     | -1.24 q < 0.098          | -1.3 q < 0.0593       | -1.41 q < 0.00118   |
| PCOLCE    | procollagen C-endopeptidase enhancer                                                     | Ssc.1122.1.S1_at    | -1.59 q < 0.00000000000164 | -1.49 q < 0.124      | -2.07 q < 0.0000389    | -1.34 q < 0.255          | -1.53 q < 0.121       | -1.6 q < 0.0317     |
| FKBP14    | FK506 binding protein 14, 22 kDa                                                         | Ssc.6848.1.A1_at    | -1.53 q < 0.00000000000181 | -1.12 q < 1          | -2.29 q < 0.0000000482 | -1.31 q < 0.254          | -1.51 q < 0.0809      | -1.65 q < 0.00637   |
| FKBP14    | FK506 binding protein 14, 22 kDa                                                         | Ssc.20986.1.S1_at   | -1.3 q < 0.00000885        | -1.03 q < 1          | -1.69 q < 0.00044      | -1.35 q < 0.112          | -1.07 q < 1           | -1.45 q < 0.0392    |
| ARPC1B    | actin related protein 2/3 complex, subunit 1B, 41kDa                                     | Ssc.15456.1.S1_at   | -1.45 q < 0.00000000000388 | -1.64 q < 0.00154    | -1.2 q < 0.656         | -2.33 q < 0.000000000288 | -1.1 q < 1            | -1.29 q < 0.44      |
| LIMS1     | LIM and senescent cell antigen-like domains 1                                            | Ssc.24149.1.A1_at   | -1.44 q < 0.00000000000826 | -1.23 q < 0.672      | -1.75 q < 0.000139     | -1.4 q < 0.057           | -1.42 q < 0.117       | -1.44 q < 0.0449    |
| ANPEP     | alanyl (membrane) aminopeptidase                                                         | Ssc.820.1.S1_at     | 1.74 q < 0.000000000145    | 1.25 q < 1           | 1.44 q < 0.402         | 2.99 q < 0.000000178     | 1.83 q < 0.0421       | 1.64 q < 0.131      |
| YWHAZ     | tyrosine 3-monooxygenase/tryptophan 5-monooxygenase activation protein, zeta polypeptide | Ssc.17423.1.S1_at   | -1.8 q < 0.000000000159    | -1.55 q < 0.338      | -1.57 q < 0.229        | -2.22 q < 0.00124        | -2.03 q < 0.0115      | -1.7 q < 0.116      |
| YWHAZ     | tyrosine 3-monooxygenase/tryptophan 5-monooxygenase activation protein, zeta polypeptide | Ssc.24859.1.A1_at   | 1.32 q < 0.000000000169    | 1.25 q < 0.314       | 1.24 q < 0.276         | 1.71 q < 0.000000169     | 1.26 q < 0.423        | 1.19 q < 0.682      |
| YWHAZ     | tyrosine 3-monooxygenase/tryptophan 5-monooxygenase activation protein, zeta polypeptide | Ssc.9681.1.A1_at    | 1.11 q < 0.0883            | 1.08 q < 1           | 1.03 q < 0.973         | 1.38 q < 0.015           | 1.03 q < 1            | 1.06 q < 1          |
| TPT1      | tumor protein, translationally-controlled 1                                              | Ssc.14343.1.S1_at   | -1.28 q < 0.0000000000231  | -1.23 q < 0.2        | -1.42 q < 0.000848     | -1.19 q < 0.225          | -1.24 q < 0.239       | -1.32 q < 0.0162    |
| SLC25A36  | solute carrier family 25, member 36                                                      | Ssc.27130.1.A1_at   | -1.3 q < 0.000000000247    | -1.62 q < 0.00000287 | -1.25 q < 0.155        | -1.18 q < 0.29           | -1.39 q < 0.0103      | -1.13 q < 1         |
| CD55      | CD55 molecule, decay accelerating factor for complement (Cromer blood group)             | Ssc.31082.1.A1_at   | 1.77 q < 0.000000000375    | 1.16 q < 1           | 2.36 q < 0.00037       | 2.93 q < 0.00000133      | 1.55 q < 0.535        | 1.39 q < 0.788      |
| CD55      | CD55 molecule, decay accelerating factor for complement (Cromer blood group)             | Ssc.271.1.A1_at     | 1.71 q < 0.000000038       | 1.23 q < 1           | 2.22 q < 0.00924       | 2.77 q < 0.000144        | 1.38 q < 1            | 1.43 q < 0.867      |
| CD55      | CD55 molecule, decay accelerating factor for complement (Cromer blood group)             | Ssc.7698.1.S1_at    | 1.29 q < 0.0000881         | 1.06 q < 1           | 1.48 q < 0.0554        | 1.71 q < 0.00127         | 1.18 q < 1            | 1.15 q < 1          |
| CD55      | CD55 molecule, decay accelerating factor for complement (Cromer blood group)             | Ssc.7698.2.A1_at    | 1.24 q < 0.0000983         | 1.02 q < 1           | 1.34 q < 0.113         | 1.65 q < 0.00021         | 1.11 q < 1            | 1.16 q < 1          |
| CD55      | CD55 molecule, decay accelerating factor for complement (Cromer blood group)             | Ssc.272.1.S1_a_at   | 1.87 q < 0.000298          | 1.12 q < 1           | 2.43 q < 0.134         | 3.3 q < 0.00949          | 1.61 q < 1            | 1.58 q < 1          |
| NFIB      | nuclear factor I/B                                                                       | Ssc.724.1.S1_at     | -2.04 q < 0.000000000784   | -1.11 q < 1          | -1.79 q < 0.206        | -3.68 q < 0.0000056      | -1.99 q < 0.163       | -2.42 q < 0.00912   |
| NFIB      | nuclear factor I/B                                                                       | Ssc.19423.1.A1_at   | 1.1 q < 0.122              | -1.01 q < 1          | -1.01 q < 0.99         | 1.23 q < 0.22            | 1.01 q < 1            | 1.36 q < 0.0394     |

| Gene Name | Gene Description                                                         | Probe Set ID      | Breed MS-WC             | Day 25 MS-WC       | Day 45 MS-WC        | Day 65 MS-WC         | Day 85 MS-WC        | Day 105 MS-WC         |
|-----------|--------------------------------------------------------------------------|-------------------|-------------------------|--------------------|---------------------|----------------------|---------------------|-----------------------|
| LOC777593 | -                                                                        | Ssc.26112.1.S1_at | -1.69 q < 0.0000000109  | 1 q < 1            | -1.58 q < 0.155     | -2.61 q < 0.00000579 | -1.75 q < 0.0756    | -1.9 q < 0.0116       |
| PITRM1    | pitrilysin metallopeptidase 1                                            | Ssc.3063.1.S1_at  | -1.36 q < 0.0000000137  | -1.11 q < 1        | -1.57 q < 0.000937  | -1.35 q < 0.0577     | -1.42 q < 0.045     | -1.37 q < 0.062       |
| PITRM1    | pitrilysin metallopeptidase 1                                            | Ssc.3063.2.S1_at  | -1.21 q < 0.00041       | -1.13 q < 1        | -1.42 q < 0.017     | -1.07 q < 0.759      | -1.24 q < 0.709     | -1.19 q < 0.815       |
| ZMAT3     | zinc finger, matrin type 3                                               | Ssc.25122.1.S1_at | -1.48 q < 0.0000000142  | -1.88 q < 0.000159 | -1.33 q < 0.34      | -1.47 q < 0.0578     | -1.2 q < 1          | -1.59 q < 0.0183      |
| FRY       | furry homolog (Drosophila)                                               | Ssc.6930.2.A1_at  | 1.47 q < 0.0000000144   | 1.77 q < 0.000836  | 1.22 q < 0.663      | 1.23 q < 0.421       | 1.25 q < 1          | 2.05 q < 0.0000398    |
| FRY       | furry homolog (Drosophila)                                               | Ssc.6930.1.A1_at  | -1.16 q < 0.0498        | 1.02 q < 1         | -1.28 q < 0.403     | -1.14 q < 0.608      | -1.43 q < 0.126     | -1.02 q < 1           |
| CA7       | carbonic anhydrase VII                                                   | Ssc.30512.1.A1_at | 1.64 q < 0.0000000159   | -1 q < 1           | 1.59 q < 0.115      | 2.83 q < 0.00000016  | 1.36 q < 1          | 1.96 q < 0.00355      |
| UGCGL2    | UDP-glucose glycoprotein glucosyltransferase 2                           | Ssc.3654.1.A1_at  | 1.51 q < 0.0000000169   | 1.43 q < 0.222     | 1.3 q < 0.488       | 1.34 q < 0.251       | 1.74 q < 0.00747    | 1.83 q < 0.00115      |
| C5orf23   | chromosome 5 open reading frame 23                                       | Ssc.7890.1.S1_at  | -1.68 q < 0.0000000222  | -2.19 q < 0.000698 | -1.55 q < 0.193     | -1.86 q < 0.0133     | -1.68 q < 0.149     | -1.25 q < 1           |
| C5orf23   | chromosome 5 open reading frame 23                                       | Ssc.26802.1.S1_at | -1.49 q < 0.000105      | -2.05 q < 0.0149   | -1.48 q < 0.437     | -1.63 q < 0.144      | -1.32 q < 1         | -1.13 q < 1           |
| C5orf23   | chromosome 5 open reading frame 23                                       | Ssc.15291.1.A1_at | -1.44 q < 0.000186      | -2.12 q < 0.00344  | -1.46 q < 0.425     | -1.42 q < 0.333      | -1.43 q < 1         | 1 q < 1               |
| C5orf23   | chromosome 5 open reading frame 23                                       | Ssc.24172.1.A1_at | -1.25 q < 0.000964      | -1.58 q < 0.0134   | -1.23 q < 0.62      | -1.08 q < 0.808      | -1.31 q < 0.73      | -1.11 q < 1           |
| EFHA1     | EF-hand domain family, member A1                                         | Ssc.13850.2.S1_at | -1.3 q < 0.0000000249   | -1.05 q < 1        | -1.47 q < 0.00145   | -1.22 q < 0.214      | -1.26 q < 0.346     | -1.57 q < 0.000058    |
| SNAPC3    | small nuclear RNA activating complex, polypeptide 3, 50kDa               | Ssc.26370.1.S1_at | -1.32 q < 0.0000000259  | -1.27 q < 0.269    | -1.08 q < 0.91      | -1.26 q < 0.165      | -1.54 q < 0.000749  | -1.54 q < 0.000556    |
| CASP8AP2  | caspace 8 associated protein 2                                           | Ssc.24845.1.S1_at | 1.21 q < 0.0000000056   | 1.24 q < 0.0408    | 1.23 q < 0.0398     | 1.2 q < 0.0796       | 1.14 q < 0.899      | 1.22 q < 0.0678       |
| CASP8AP2  | caspace 8 associated protein 2                                           | Ssc.30354.1.A1_at | 1.17 q < 0.00111        | 1.3 q < 0.105      | 1.15 q < 0.658      | 1.1 q < 0.634        | 1.13 q < 1          | 1.19 q < 0.673        |
| CCNB1P1   | cyclin B1 interacting protein 1                                          | Ssc.19486.1.S1_at | -1.25 q < 0.00000000563 | -1.14 q < 0.775    | -1.23 q < 0.132     | -1.23 q < 0.109      | -1.3 q < 0.0457     | -1.35 q < 0.00563     |
| COX4I1    | cytochrome c oxidase subunit IV isoform 1                                | Ssc.12219.1.A1_at | -1.32 q < 0.00000000683 | -1.17 q < 0.82     | -1.51 q < 0.00151   | -1.29 q < 0.111      | -1.25 q < 0.583     | -1.4 q < 0.0215       |
| TCA       | -                                                                        | Ssc.15848.1.S1_at | 1.21 q < 0.00000000818  | 1.1 q < 0.987      | 1.34 q < 0.00114    | 1.18 q < 0.157       | 1.21 q < 0.224      | 1.25 q < 0.0322       |
| TCA       | -                                                                        | Ssc.428.5.S1_at   | -1.07 q < 0.568         | -1.03 q < 1        | 1.08 q < 0.913      | -1 q < 0.991         | -1.02 q < 1         | -1.44 q < 0.0273      |
| TCA       | -                                                                        | Ssc.29007.1.A1_at | 1.05 q < 0.633          | -1.1 q < 1         | 1.03 q < 0.972      | 1.38 q < 0.00577     | -1.04 q < 1         | 1.02 q < 1            |
| CCDC90B   | coiled-coil domain containing 90B                                        | Ssc.12887.1.A1_at | 1.24 q < 0.000000011    | 1.05 q < 1         | 1.17 q < 0.423      | 1.5 q < 0.0000176    | 1.3 q < 0.0353      | 1.23 q < 0.171        |
| C1orf55   | chromosome 1 open reading frame 55                                       | Ssc.11105.1.S1_at | -1.22 q < 0.0000000116  | -1.05 q < 1        | -1.43 q < 0.0000735 | -1.15 q < 0.281      | -1.25 q < 0.0993    | -1.26 q < 0.0367      |
| C1orf55   | chromosome 1 open reading frame 55                                       | Ssc.11105.2.S1_at | -1.14 q < 0.0045        | -1.02 q < 1        | -1.28 q < 0.0703    | -1.07 q < 0.706      | -1.16 q < 1         | -1.18 q < 0.6         |
| RAD50     | RAD50 homolog (S. cerevisiae)                                            | Ssc.14035.1.S1_at | -1.28 q < 0.0000000165  | -1.34 q < 0.0416   | -1.44 q < 0.00239   | -1.06 q < 0.782      | -1.29 q < 0.185     | -1.3 q < 0.0843       |
| TMEM130   | transmembrane protein 130                                                | Ssc.27421.1.A1_at | 1.64 q < 0.0000000212   | 1.01 q < 1         | 2.11 q < 0.00231    | 1.57 q < 0.131       | 1.05 q < 1          | 3.42 q < 0.0000000222 |
| ALCAM     | activated leukocyte cell adhesion molecule                               | Ssc.10323.1.A1_at | -1.32 q < 0.000000023   | -1.19 q < 0.733    | -1.42 q < 0.0227    | -1.29 q < 0.128      | -1.5 q < 0.00643    | -1.24 q < 0.493       |
| MCF2L2    | MCF.2 cell line derived transforming sequence-like 2                     | Ssc.30296.2.A1_at | 1.38 q < 0.0000000233   | 1.17 q < 1         | 1.29 q < 0.332      | 1.78 q < 0.0000664   | 1.28 q < 0.747      | 1.45 q < 0.0497       |
| MCF2L2    | MCF.2 cell line derived transforming sequence-like 2                     | Ssc.30296.1.S1_at | 1.18 q < 0.00127        | 1.11 q < 1         | 1.14 q < 0.717      | 1.27 q < 0.118       | 1.22 q < 0.747      | 1.15 q < 1            |
| HMGCS1    | 3-hydroxy-3-methylglutaryl-CoA synthase 1 (soluble)                      | Ssc.13604.1.A1_at | 1.43 q < 0.0000000247   | 1.15 q < 1         | 1.23 q < 0.651      | 1.71 q < 0.00202     | 1.5 q < 0.0992      | 1.67 q < 0.00489      |
| HMGCS1    | 3-hydroxy-3-methylglutaryl-CoA synthase 1 (soluble)                      | Ssc.11126.1.A1_at | 1.45 q < 0.0000364      | 1.71 q < 0.0691    | 1 q < 1             | 1.8 q < 0.0209       | 1.46 q < 0.712      | 1.41 q < 0.608        |
| ACTB      | actin, beta                                                              | Ssc.4003.1.S1_at  | 1.21 q < 0.0000000266   | 1.19 q < 0.242     | 1.16 q < 0.317      | 1 q < 0.989          | 1.33 q < 0.00343    | 1.39 q < 0.000133     |
| ACTB      | actin, beta                                                              | Ssc.4003.2.A1_at  | -1.23 q < 0.0000448     | -1 q < 1           | -1.31 q < 0.117     | -1.08 q < 0.743      | -1.36 q < 0.0982    | -1.46 q < 0.00659     |
| SPOCK3    | sparc/osteonectin, cwcv and kazal-like domains proteoglycan (testican) 3 | Ssc.6472.1.S1_at  | 1.29 q < 0.0000000562   | 1.05 q < 1         | 1.21 q < 0.404      | 1.1 q < 0.65         | 1.73 q < 0.00000231 | 1.48 q < 0.00271      |
| SPOCK3    | sparc/osteonectin, cwcv and kazal-like domains proteoglycan (testican) 3 | Ssc.25051.1.S1_at | 1.21 q < 0.000136       | -1.02 q < 1        | 1.23 q < 0.354      | 1.05 q < 0.825       | 1.48 q < 0.00528    | 1.4 q < 0.0218        |
| SNX29     | sorting nexin 29                                                         | Ssc.5001.2.A1_at  | -1.3 q < 0.0000000637   | -1.19 q < 0.683    | -1.41 q < 0.0188    | -1.21 q < 0.291      | -1.5 q < 0.00392    | -1.22 q < 0.591       |
| HOXA10    | homeobox A10                                                             | Ssc.15962.1.S1_at | -1.36 q < 0.0000000732  | -1.28 q < 0.453    | -1.53 q < 0.00924   | -1.43 q < 0.0378     | -1.2 q < 1          | -1.37 q < 0.144       |
| HOXA10    | homeobox A10                                                             | Ssc.26254.1.S1_at | -1.3 q < 0.0000135      | -1.22 q < 0.796    | -1.36 q < 0.181     | -1.53 q < 0.0123     | -1.2 q < 1          | -1.25 q < 0.703       |
| HOXA10    | homeobox A10                                                             | Ssc.27606.1.S1_at | -1.22 q < 0.00138       | -1.23 q < 0.684    | -1.24 q < 0.501     | -1.43 q < 0.045      | -1.07 q < 1         | -1.17 q < 1           |
| HOXA10    | homeobox A10                                                             | Ssc.12652.1.A1_at | -1.24 q < 0.0245        | 1.02 q < 1         | -1.41 q < 0.356     | -1.34 q < 0.346      | -1.32 q < 1         | -1.2 q < 1            |

| Gene Name | Gene Description                                                                           | Probe Set ID        | Breed MS-WC           | Day 25 MS-WC          | Day 45 MS-WC      | Day 65 MS-WC         | Day 85 MS-WC       | Day 105 MS-WC      |
|-----------|--------------------------------------------------------------------------------------------|---------------------|-----------------------|-----------------------|-------------------|----------------------|--------------------|--------------------|
| UGT8      | UDP glycosyltransferase 8                                                                  | Ssc.17490.1.S1_at   | 1.65 q < 0.000000735  | 1.66 q < 0.168        | 2.41 q < 0.000325 | 2.35 q < 0.000435    | 1.24 q < 1         | 1.07 q < 1         |
| CLEC10A   | C-type lectin domain family 10, member A                                                   | Ssc.1590.1.S1_at    | -1.46 q < 0.000000808 | -1.16 q < 1           | -1.65 q < 0.0168  | -1.53 q < 0.0456     | -1.45 q < 0.318    | -1.54 q < 0.0693   |
| CHURC1    | churchill domain containing 1                                                              | Ssc.10209.1.A1_at   | 1.33 q < 0.000000837  | -1.05 q < 1           | 1.33 q < 0.147    | 1.68 q < 0.000159    | 1.35 q < 0.239     | 1.48 q < 0.0153    |
| FOXJ2     | forkhead box J2                                                                            | Ssc.2463.2.A1_at    | -1.21 q < 0.000000955 | -1.23 q < 0.119       | -1.32 q < 0.00591 | -1.1 q < 0.515       | -1.29 q < 0.0309   | -1.13 q < 0.895    |
| LIMA1     | LIM domain and actin binding 1                                                             | Ssc.9740.1.A1_at    | 1.43 q < 0.00000128   | 1.08 q < 1            | 1.37 q < 0.265    | 2.36 q < 0.000000982 | 1.64 q < 0.0221    | 1.05 q < 1         |
| NANS      | N-acetylneuraminic acid synthase                                                           | Ssc.30961.1.A1_at   | -1.31 q < 0.000000145 | -2.01 q < 0.000000958 | -1.4 q < 0.0387   | -1.24 q < 0.268      | -1.09 q < 1        | -1.03 q < 1        |
| Q8TEH8    | -                                                                                          | Ssc.21221.1.S1_at   | -1.26 q < 0.000000197 | -1.22 q < 0.387       | -1.28 q < 0.11    | -1.07 q < 0.743      | -1.41 q < 0.009    | -1.34 q < 0.0343   |
| C12orf57  | chromosome 12 open reading frame 57                                                        | Ssc.15584.1.S1_at   | -1.3 q < 0.000000197  | -1.17 q < 0.838       | -1.43 q < 0.015   | -1.39 q < 0.0243     | -1.28 q < 0.422    | -1.22 q < 0.6      |
| EFHD1     | EF-hand domain family, member D1                                                           | Ssc.27399.1.S1_at   | 1.35 q < 0.000000239  | -1.03 q < 1           | 1.33 q < 0.216    | 1.64 q < 0.00141     | 1.59 q < 0.00637   | 1.33 q < 0.277     |
| ERVWE1    | endogenous retroviral family W, env(C7), member 1                                          | Ssc.4026.1.S1_at    | -1.35 q < 0.000000239 | 1.02 q < 1            | -1.61 q < 0.00277 | -1.38 q < 0.0795     | -1.35 q < 0.35     | -1.51 q < 0.0164   |
| SLC3A2    | solute carrier family 3 (activators of dibasic and neutral amino acid transport), member 2 | Ssc.2330.1.S1_at    | -1.33 q < 0.000000341 | -1.27 q < 0.441       | -1.45 q < 0.03    | -1.85 q < 0.00000466 | -1.02 q < 1        | -1.18 q < 1        |
| TBC1D22A  | TBC1 domain family, member 22A                                                             | Ssc.30377.1.A1_at   | 1.23 q < 0.0000004    | 1.38 q < 0.00461      | 1.13 q < 0.677    | 1.24 q < 0.102       | 1.05 q < 1         | 1.38 q < 0.00451   |
| PEG10     | paternally expressed 10                                                                    | Ssc.24007.1.S1_at   | -1.37 q < 0.000000447 | -1.13 q < 1           | -1.23 q < 0.615   | -1.97 q < 0.00000927 | -1.16 q < 1        | -1.54 q < 0.025    |
| PEG10     | paternally expressed 10                                                                    | Ssc.13476.1.A1_at   | -1.32 q < 0.00289     | 1.31 q < 0.848        | -2.08 q < 0.00131 | -1.44 q < 0.23       | -1.13 q < 1        | -1.55 q < 0.205    |
| BAT1      | HLA-B associated transcript 1                                                              | Ssc.12005.1.A1_at   | 1.77 q < 0.000000462  | 1.43 q < 0.838        | 2.34 q < 0.00924  | 1.6 q < 0.263        | 1.26 q < 1         | 2.59 q < 0.00184   |
| BAT1      | HLA-B associated transcript 1                                                              | Ssc.11719.1.A1_at   | -1.09 q < 0.524       | 1.06 q < 1            | -1.54 q < 0.0286  | 1.12 q < 0.692       | -1.06 q < 1        | -1.09 q < 1        |
| OSBPL10   | oxysterol binding protein-like 10                                                          | Ssc.27055.1.A1_at   | -1.24 q < 0.000000464 | -1.08 q < 1           | -1.41 q < 0.00397 | -1.16 q < 0.369      | -1.34 q < 0.0437   | -1.25 q < 0.213    |
| SNX10     | sorting nexin 10                                                                           | Ssc.11006.1.S1_at   | 1.39 q < 0.000000481  | 1.02 q < 1            | 1.36 q < 0.265    | 1.28 q < 0.326       | 1.62 q < 0.0167    | 1.8 q < 0.000564   |
| TMCC2     | transmembrane and coiled-coil domain family 2                                              | Ssc.14043.1.A1_at   | -1.29 q < 0.000000481 | -1.39 q < 0.0478      | -1.25 q < 0.31    | -1.37 q < 0.0377     | -1.36 q < 0.119    | -1.1 q < 1         |
| DDEF2     | ArfGAP with SH3 domain, ankyrin repeat and PH domain 2                                     | Ssc.5337.1.S1_at    | -1.37 q < 0.000000486 | -1.11 q < 1           | -1.7 q < 0.00145  | -1.27 q < 0.312      | -1.75 q < 0.000749 | -1.14 q < 1        |
| NAV2      | neuron navigator 2                                                                         | Ssc.27911.1.S1_at   | -1.84 q < 0.000000535 | 1.01 q < 1            | -1.72 q < 0.304   | -2.49 q < 0.0068     | -2.54 q < 0.0103   | -1.96 q < 0.136    |
| NAV2      | neuron navigator 2                                                                         | Ssc.5613.1.A1_at    | 1.21 q < 0.0392       | 1.24 q < 0.943        | -1.05 q < 0.973   | 1.56 q < 0.0541      | 1.29 q < 1         | 1.08 q < 1         |
| DCX       | doublecortin                                                                               | Ssc.27479.1.A1_at   | -1.28 q < 0.00000065  | -1.04 q < 1           | -1.15 q < 0.707   | -1.58 q < 0.000283   | -1.28 q < 0.444    | -1.42 q < 0.0161   |
| DCX       | doublecortin                                                                               | Ssc.19017.1.A1_at   | -1.22 q < 0.00674     | -1.13 q < 1           | -1.13 q < 0.876   | -1.31 q < 0.251      | -1.3 q < 0.866     | -1.23 q < 0.93     |
| CPE       | carboxypeptidase E                                                                         | Ssc.5464.1.A1_at    | -1.73 q < 0.000000651 | 1.27 q < 1            | -1.92 q < 0.0744  | -1.61 q < 0.225      | -2.97 q < 0.000129 | -2.11 q < 0.0255   |
| MTMR1     | myotubularin related protein 1                                                             | Ssc.29318.1.A1_at   | 1.25 q < 0.000000809  | 1.34 q < 0.0457       | 1.07 q < 0.91     | 1.35 q < 0.0234      | 1.29 q < 0.187     | 1.21 q < 0.487     |
| APPL2     | adaptor protein, phosphotyrosine interaction, PH domain and leucine zipper containing 2    | Ssc.18176.1.S1_at   | -1.33 q < 0.00000106  | -1.2 q < 0.853        | -1.59 q < 0.00446 | -1.18 q < 0.507      | -1.26 q < 0.901    | -1.47 q < 0.0335   |
| APPL2     | amyloid beta (A4) precursor-like protein 2                                                 | Ssc.18176.1.S1_at   | -1.33 q < 0.00000106  | -1.2 q < 0.853        | -1.59 q < 0.00446 | -1.18 q < 0.507      | -1.26 q < 0.901    | -1.47 q < 0.0335   |
| KIF26A    | kinesin family member 26A                                                                  | Ssc.11712.1.A1_at   | -1.24 q < 0.0000013   | -1.22 q < 0.353       | -1.39 q < 0.00879 | -1.32 q < 0.0341     | -1.1 q < 1         | -1.17 q < 0.726    |
| CBX1      | chromobox homolog 1                                                                        | Ssc.27174.1.S1_at   | -1.24 q < 0.00000145  | -1.1 q < 1            | -1.32 q < 0.0485  | -1.32 q < 0.0329     | -1.22 q < 0.631    | -1.24 q < 0.283    |
| NP_002127 | -                                                                                          | Ssc.17290.1.A1_at   | 1.34 q < 0.0000017    | 1.69 q < 0.00122      | 1.53 q < 0.0187   | 1.24 q < 0.352       | 1.19 q < 1         | 1.13 q < 1         |
| CEPT1     | choline/ethanolamine phosphotransferase 1                                                  | Ssc.30316.1.A1_at   | 1.31 q < 0.00000203   | 1.49 q < 0.0228       | 1.25 q < 0.466    | 1.59 q < 0.0026      | 1.19 q < 1         | 1.12 q < 1         |
| STX3      | syntaxin 3                                                                                 | Ssc.2000.1.A1_at    | 1.39 q < 0.00000229   | 1.04 q < 1            | 1.25 q < 0.63     | 1.88 q < 0.000359    | 1.62 q < 0.0309    | 1.31 q < 0.628     |
| CPEB4     | cytoplasmic polyadenylation element binding protein 4                                      | Ssc.8038.3.S1_at    | 1.22 q < 0.0000023    | 1.09 q < 1            | 1.2 q < 0.335     | 1.31 q < 0.0265      | 1.16 q < 1         | 1.34 q < 0.0159    |
| CPEB4     | cytoplasmic polyadenylation element binding protein 4                                      | Ssc.24187.1.S1_at   | -1.09 q < 0.213       | -1.01 q < 1           | -1.4 q < 0.0159   | -1.09 q < 0.694      | 1.02 q < 1         | -1.02 q < 1        |
| NGLY1     | N-glycanase 1                                                                              | Ssc.26695.1.S1_at   | 1.4 q < 0.00000246    | 1.06 q < 1            | 1.24 q < 0.663    | 1.59 q < 0.0243      | 1.23 q < 1         | 2.07 q < 0.0000277 |
| NGLY1     | N-glycanase 1                                                                              | Ssc.13314.1.A1_at   | 1.29 q < 0.00423      | 1.11 q < 1            | 1.03 q < 0.988    | 1.57 q < 0.0711      | 1.11 q < 1         | 1.78 q < 0.0126    |
| CHIC1     | cysteine-rich hydrophobic domain 1                                                         | Ssc.26747.1.A1_at   | 1.25 q < 0.00000249   | 1.08 q < 1            | 1.15 q < 0.695    | 1.5 q < 0.000784     | 1.42 q < 0.0113    | 1.14 q < 1         |
| C12orf64  | chromosome 12 open reading frame 64                                                        | Ssc.24631.1.S1_at   | 1.57 q < 0.0000027    | -1.35 q < 0.866       | 1.95 q < 0.0205   | 2.34 q < 0.000645    | 1.7 q < 0.223      | 1.68 q < 0.159     |
| ANP32B    | acidic (leucine-rich) nuclear phosphoprotein 32 family, member B                           | Ssc.28928.1.A1_at   | -1.25 q < 0.00000279  | -1.16 q < 0.853       | -1.39 q < 0.0178  | -1.34 q < 0.041      | -1.07 q < 1        | -1.31 q < 0.101    |
| EFEMP2    | EGF-containing fibulin-like extracellular matrix protein 2                                 | Ssc.4267.1.A1_at    | -1.34 q < 0.00000331  | -1.53 q < 0.0338      | -1.58 q < 0.0131  | -1.2 q < 0.474       | -1.15 q < 1        | -1.32 q < 0.44     |
| EFEMP2    | EGF-containing fibulin-like extracellular matrix protein 2                                 | Ssc.4267.3.S1_at    | -1.17 q < 0.0358      | -1.27 q < 0.543       | -1.31 q < 0.301   | -1.1 q < 0.731       | -1.05 q < 1        | -1.12 q < 1        |
| KLF8      | Kruppel-like factor 8                                                                      | Ssc.10105.1.A1_at   | 1.16 q < 0.00000349   | 1.09 q < 0.997        | 1.31 q < 0.00131  | 1.27 q < 0.00406     | 1.08 q < 1         | 1.06 q < 1         |
| FGL2      | fibrinogen-like 2                                                                          | Ssc.12579.1.A1_s_at | -1.74 q < 0.00000352  | -1.33 q < 1           | -1.32 q < 0.824   | -2.3 q < 0.0126      | -1.72 q < 0.569    | -2.28 q < 0.02     |

| Gene Name | Gene Description                                                          | Probe Set ID          | Breed MS-WC          | Day 25 MS-WC             | Day 45 MS-WC          | Day 65 MS-WC       | Day 85 MS-WC          | Day 105 MS-WC     |
|-----------|---------------------------------------------------------------------------|-----------------------|----------------------|--------------------------|-----------------------|--------------------|-----------------------|-------------------|
| FGL2      | fibrinogen-like 2                                                         | SscAffx.9.1.S1_at     | -1.47 q < 0.00626    | -1.06 q < 1              | -1.15 q < 0.94        | -1.85 q < 0.144    | -1.41 q < 1           | -2.14 q < 0.0693  |
| FGL2      | fibrinogen-like 2                                                         | Ssc.22050.1.S1_s_at   | -1.32 q < 0.0302     | 1.03 q < 1               | -1.11 q < 0.947       | -1.45 q < 0.375    | -1.34 q < 1           | -1.93 q < 0.0642  |
| PUS7L     | pseudouridylate synthase 7 homolog (S. cerevisiae)-like                   | Ssc.9977.1.A1_at      | -1.27 q < 0.0000365  | -1.63 q < 0.000172       | -1.38 q < 0.0459      | -1.06 q < 0.83     | -1.19 q < 1           | -1.17 q < 0.973   |
| WDR35     | WD repeat domain 35                                                       | Ssc.8078.1.A1_at      | -1.3 q < 0.00000464  | -1.27 q < 0.457          | -1.49 q < 0.0177      | -1.17 q < 0.495    | -1.58 q < 0.00537     | -1.06 q < 1       |
| CD2BP2    | CD2 (cytoplasmic tail) binding protein 2                                  | Ssc.19558.1.S1_at     | -1.18 q < 0.0000056  | -1.17 q < 0.391          | -1.25 q < 0.0396      | -1.1 q < 0.507     | -1.09 q < 1           | -1.27 q < 0.0285  |
| CD2BP2    | CD2 (cytoplasmic tail) binding protein 2                                  | Ssc.19558.2.S1_a_at   | -1.14 q < 0.00641    | -1.14 q < 0.855          | -1.19 q < 0.379       | -1.1 q < 0.576     | -1.05 q < 1           | -1.21 q < 0.403   |
| APOBEC3H  | apolipoprotein B mRNA editing enzyme, catalytic polypeptide-like 3H       | Ssc.5332.1.S1_at      | -1.2 q < 0.00000573  | -1.35 q < 0.0091         | -1.15 q < 0.524       | -1.1 q < 0.587     | -1.11 q < 1           | -1.31 q < 0.025   |
| RPL12     | ribosomal protein L12                                                     | Ssc.939.1.A1_at       | -1.27 q < 0.00000767 | -1.15 q < 1              | -1.4 q < 0.0469       | -1.28 q < 0.175    | -1.13 q < 1           | -1.44 q < 0.0242  |
| RPL38     | ribosomal protein L38                                                     | Ssc.28256.1.A1_at     | -1.41 q < 0.000011   | -1 q < 1                 | -2.74 q < 0.000000233 | -1.23 q < 0.529    | 1.05 q < 1            | -1.75 q < 0.0126  |
| EMD       | emerin                                                                    | Ssc.4513.2.A1_a_at    | -1.21 q < 0.0000116  | -1.47 q < 0.00051        | -1.32 q < 0.0309      | 1.02 q < 0.921     | -1.09 q < 1           | -1.25 q < 0.205   |
| OSBPL3    | oxysterol binding protein-like 3                                          | Ssc.27522.1.S1_at     | -1.23 q < 0.0000132  | -1 q < 1                 | -1.04 q < 0.964       | -1.51 q < 0.000797 | -1.41 q < 0.0197      | -1.3 q < 0.144    |
| OSBPL3    | oxysterol binding protein-like 3                                          | Ssc.21874.1.S1_at     | -1.24 q < 0.000462   | -1.11 q < 1              | -1.08 q < 0.923       | -1.36 q < 0.11     | -1.35 q < 0.384       | -1.36 q < 0.205   |
| OSBPL3    | oxysterol binding protein-like 3                                          | Ssc.6070.1.A1_at      | -1.16 q < 0.0453     | -1.08 q < 1              | 1.03 q < 0.985        | -1.38 q < 0.109    | -1.34 q < 0.495       | -1.1 q < 1        |
| FOXO1     | forkhead box O1                                                           | Ssc.11251.1.A1_at     | 1.2 q < 0.0000133    | 1.11 q < 1               | 1.14 q < 0.634        | 1.33 q < 0.0191    | 1.14 q < 1            | 1.31 q < 0.0373   |
| FOXO1     | forkhead box O1                                                           | Ssc.73.1.S1_at        | -1.21 q < 0.000494   | -1.04 q < 1              | -1.12 q < 0.842       | -1.07 q < 0.797    | -1.48 q < 0.0115      | -1.42 q < 0.0267  |
| NP_057626 | -                                                                         | Ssc.8803.1.A1_at      | 1.46 q < 0.0000177   | 1.9 q < 0.01             | 1.05 q < 0.978        | 1.78 q < 0.0216    | 1.38 q < 1            | 1.35 q < 0.802    |
| TSC22D2   | TSC22 domain family, member 2                                             | Ssc.21290.1.S1_at     | -1.32 q < 0.0000232  | -1.25 q < 0.735          | 1.04 q < 0.973        | -1.25 q < 0.388    | -1.65 q < 0.00827     | -1.62 q < 0.00807 |
| KIAA1128  | family with sequence similarity 190, member B                             | Ssc.24593.1.A1_at     | -1.17 q < 0.0000237  | 1.04 q < 1               | -1.26 q < 0.0353      | -1.25 q < 0.0336   | -1.22 q < 0.185       | -1.16 q < 0.484   |
| RPL10     | ribosomal protein L10                                                     | Ssc.9130.1.A1_at      | -1.13 q < 0.0000292  | -1.03 q < 1              | -1.24 q < 0.00715     | -1.08 q < 0.505    | -1.02 q < 1           | -1.3 q < 0.000227 |
| RPL10     | ribosomal protein L15                                                     | Ssc.9130.1.A1_at      | -1.13 q < 0.0000292  | -1.03 q < 1              | -1.24 q < 0.00715     | -1.08 q < 0.505    | -1.02 q < 1           | -1.3 q < 0.000227 |
| HSDL2     | hydroxysteroid dehydrogenase like 2                                       | Ssc.22023.1.S1_at     | -1.3 q < 0.0000302   | 1.25 q < 0.681           | -1.45 q < 0.0629      | -1.34 q < 0.156    | -1.55 q < 0.0221      | -1.52 q < 0.0219  |
| HSDL2     | hydroxysteroid dehydrogenase like 2                                       | Ssc.29859.1.A1_at     | -1.16 q < 0.0166     | 1.06 q < 1               | -1.22 q < 0.488       | -1.18 q < 0.457    | -1.38 q < 0.119       | -1.13 q < 1       |
| KIAA0415  | KIAA0415                                                                  | Ssc.27938.1.S1_at     | -1.28 q < 0.0000333  | -1.15 q < 1              | -1.47 q < 0.0291      | -1.12 q < 0.66     | -1.55 q < 0.0112      | -1.16 q < 1       |
| BBX       | bobby sox homolog (Drosophila)                                            | Ssc.1026.1.S1_at      | -1.27 q < 0.0000421  | -1.14 q < 1              | -1.47 q < 0.0223      | -1.12 q < 0.657    | -1.47 q < 0.0446      | -1.2 q < 0.937    |
| BBX       | bobby sox homolog (Drosophila)                                            | Ssc.5318.1.A1_at      | -1.16 q < 0.0161     | -1.25 q < 0.512          | -1.11 q < 0.879       | -1.09 q < 0.723    | -1.29 q < 0.53        | -1.1 q < 1        |
| RPL32     | ribosomal protein L32                                                     | Ssc.3284.1.A1_at      | -1.15 q < 0.0000423  | 1.05 q < 1               | -1.29 q < 0.004       | -1.08 q < 0.563    | -1.12 q < 1           | -1.32 q < 0.00111 |
| TM7SF2    | transmembrane 7 superfamily member 2                                      | Ssc.4715.1.S1_at      | 1.57 q < 0.000043    | 1.42 q < 0.809           | -1.29 q < 0.814       | 2.19 q < 0.0089    | 2 q < 0.069           | 1.99 q < 0.0449   |
| CALD1     | caldesmon 1                                                               | Ssc.17313.2.S1_at     | -1.41 q < 0.0000566  | -1.18 q < 1              | -1.7 q < 0.0398       | -1.68 q < 0.0349   | -1.27 q < 1           | -1.3 q < 0.935    |
| CALD1     | caldesmon 1                                                               | Ssc.17313.1.A1_at     | -1.43 q < 0.000036   | -1.16 q < 1              | -1.94 q < 0.00454     | -1.45 q < 0.215    | -1.32 q < 1           | -1.39 q < 0.643   |
| STXBPL5L  | syntaxin binding protein 5-like                                           | Ssc.4671.1.A1_at      | 1.29 q < 0.0000809   | 1.07 q < 1               | 1.49 q < 0.0389       | 1.66 q < 0.00204   | 1.3 q < 0.734         | 1.03 q < 1        |
| GCNT2     | glucosaminyl (N-acetyl) transferase 2, l-branching enzyme (l blood group) | Ssc.12815.1.A1_at     | 1.26 q < 0.000106    | 1.07 q < 1               | 1.58 q < 0.00379      | 1.62 q < 0.00132   | 1.08 q < 1            | 1.07 q < 1        |
| PKN2      | protein kinase N2                                                         | Ssc.19164.1.A1_at     | -1.26 q < 0.000124   | -1.05 q < 1              | -1.69 q < 0.000684    | 1.2 q < 0.441      | -2.06 q < 0.000000197 | -1.05 q < 1       |
| PKN2      | protein kinase N2                                                         | Ssc.9980.1.S1_at      | -1.37 q < 0.0000375  | -1.53 q < 0.12           | -1.62 q < 0.0398      | -1.05 q < 0.901    | -1.48 q < 0.33        | -1.27 q < 0.923   |
| TXNIP     | thioredoxin interacting protein                                           | Ssc.16648.1.S1_at     | -1.25 q < 0.000158   | -2.38 q < 0.000000000238 | -1.03 q < 0.982       | -1.41 q < 0.0473   | -1.02 q < 1           | 1.14 q < 1        |
| RNF167    | ring finger protein 167                                                   | Ssc.20226.1.S1_at     | -1.27 q < 0.00016    | -1.09 q < 1              | -1.57 q < 0.00869     | 1.03 q < 0.925     | -1.26 q < 0.997       | -1.56 q < 0.0116  |
| TC2N      | tandem C2 domains, nuclear                                                | Ssc.16844.1.A1_at     | 1.41 q < 0.000167    | 1.15 q < 1               | 1.78 q < 0.0309       | 1.8 q < 0.0197     | 1.07 q < 1            | 1.4 q < 0.656     |
| WFDC2     | WAP four-disulfide core domain 2                                          | Ssc.27921.1.S1_at     | 1.35 q < 0.000176    | -1.03 q < 1              | 1.27 q < 0.646        | 1.81 q < 0.004     | 1.15 q < 1            | 1.73 q < 0.0138   |
| WFDC2     | WAP four-disulfide core domain 2                                          | Ssc.3968.1.S1_at      | 1.78 q < 0.0755      | -1.37 q < 1              | 2.16 q < 0.659        | 4.55 q < 0.0472    | 1.72 q < 1            | 1.43 q < 1        |
| ACTG1     | actin, gamma 1                                                            | AFFX-Ssc-actin-3_at   | -1.11 q < 0.000178   | 1 q < 1                  | -1.14 q < 0.188       | -1.18 q < 0.0374   | -1.04 q < 1           | -1.2 q < 0.025    |
| ACTG1     | actin, gamma 1                                                            | Ssc.13874.1.S1_at     | -1.1 q < 0.00461     | 1.01 q < 1               | -1.14 q < 0.344       | -1.16 q < 0.14     | -1.03 q < 1           | -1.19 q < 0.117   |
| ACTG1     | actin, gamma 1                                                            | AFFX-Ssc-actin-5_x_at | -1.25 q < 0.0354     | 1.08 q < 1               | -1.38 q < 0.494       | -1.37 q < 0.344    | -1.05 q < 1           | -1.64 q < 0.112   |
| ACTG1     | actin, gamma 1                                                            | AFFX-Ssc-actin-M_at   | -1.17 q < 0.0468     | 1.03 q < 1               | -1.23 q < 0.613       | -1.19 q < 0.511    | -1.06 q < 1           | -1.46 q < 0.0907  |
| ACTG1     | actin, gamma 1                                                            | AFFX-Ssc-actin-5_at   | -1.35 q < 0.066      | 1.05 q < 1               | -1.35 q < 0.816       | -1.41 q < 0.518    | -1.04 q < 1           | -2.36 q < 0.0296  |
| IGF2BP1   | insulin-like growth factor 2 mRNA binding protein 1                       | Ssc.26377.1.A1_at     | -1.22 q < 0.000198   | -1.47 q < 0.00803        | -1.47 q < 0.00821     | -1.13 q < 0.566    | -1.04 q < 1           | -1.06 q < 1       |
| PARP11    | poly (ADP-ribose) polymerase family, member 11                            | Ssc.28870.1.S1_at     | 1.17 q < 0.000274    | 1.21 q < 0.348           | 1.35 q < 0.0125       | 1 q < 0.995        | 1.01 q < 1            | 1.33 q < 0.0206   |
| ARSE      | arylsulfatase E (chondrodysplasia punctata 1)                             | Ssc.4033.2.S1_at      | 1.51 q < 0.00031     | -1.37 q < 0.924          | 2.22 q < 0.0105       | 2.71 q < 0.000295  | 1.4 q < 1             | 1.27 q < 1        |



| Gene Name | Gene Description                                                                             | Probe Set ID        | Breed MS-WC                 | Day 25 MS-WC              | Day 45 MS-WC           | Day 65 MS-WC          | Day 85 MS-WC      | Day 105 MS-WC     |
|-----------|----------------------------------------------------------------------------------------------|---------------------|-----------------------------|---------------------------|------------------------|-----------------------|-------------------|-------------------|
| ARSE      | arylsulfatase E (chondrodysplasia punctata 1)                                                | Ssc.1707.1.S1_at    | 1.13 q < 0.273              | -1.29 q < 0.749           | 1.3 q < 0.52           | 1.56 q < 0.0463       | 1.08 q < 1        | 1.1 q < 1         |
| PPP1R1A   | protein phosphatase 1, regulatory (inhibitor) subunit 1A                                     | Ssc.21985.1.S1_at   | 1.26 q < 0.000385           | 1.5 q < 0.0388            | 1.17 q < 0.792         | 1.14 q < 0.619        | 1.03 q < 1        | 1.55 q < 0.0164   |
| MFSD1     | major facilitator superfamily domain containing 1                                            | Ssc.18528.2.A1_at   | -1.33 q < 0.000435          | -1.18 q < 1               | -1.85 q < 0.00393      | 1.1 q < 0.79          | -1.15 q < 1       | -1.83 q < 0.00466 |
| EPAS1     | endothelial PAS domain protein 1                                                             | Ssc.5260.1.A1_at    | 1.18 q < 0.000836           | -1.15 q < 0.91            | 1.18 q < 0.54          | 1.41 q < 0.0105       | 1.12 q < 1        | 1.44 q < 0.00691  |
| C10orf72  | chromosome 10 open reading frame 72                                                          | Ssc.16442.1.S1_at   | -1.23 q < 0.000986          | -1.45 q < 0.0457          | -1.47 q < 0.0286       | -1.24 q < 0.321       | -1.09 q < 1       | 1.05 q < 1        |
| FHIT      | fragile histidine triad gene                                                                 | Ssc.19442.1.A1_at   | 1.15 q < 0.00138            | -1.03 q < 1               | 1.28 q < 0.0481        | 1.28 q < 0.0341       | 1.12 q < 1        | 1.12 q < 1        |
| RCAN2     | regulator of calcineurin 2                                                                   | Ssc.18504.1.S1_at   | 1.18 q < 0.00173            | 1.16 q < 0.852            | 1.1 q < 0.878          | 1.35 q < 0.0428       | -1.04 q < 1       | 1.38 q < 0.034    |
| SNX12     | sorting nexin 12                                                                             | Ssc.2628.1.S1_at    | -1.24 q < 0.00174           | -1.09 q < 1               | -1.63 q < 0.0053       | -1.12 q < 0.695       | 1.03 q < 1        | -1.51 q < 0.0361  |
| RPS12     | ribosomal protein S12                                                                        | Ssc.13774.1.S1_at   | -1.13 q < 0.00374           | -1.04 q < 1               | -1.27 q < 0.039        | 1.03 q < 0.879        | -1.04 q < 1       | -1.35 q < 0.00274 |
| RPS12     | mitochondrial ribosomal protein S12                                                          | Ssc.13774.1.S1_at   | -1.13 q < 0.00374           | -1.04 q < 1               | -1.27 q < 0.039        | 1.03 q < 0.879        | -1.04 q < 1       | -1.35 q < 0.00274 |
| KDEL2     | KDEL (Lys-Asp-Glu-Leu) containing 2                                                          | Ssc.31019.1.S1_at   | -1.11 q < 0.00432           | -1.01 q < 1               | 1 q < 0.997            | 1.03 q < 0.839        | -1.29 q < 0.00528 | -1.31 q < 0.00115 |
| RPS5      | ribosomal protein S5                                                                         | Ssc.792.1.S1_at     | -1.11 q < 0.00496           | -1 q < 1                  | -1.24 q < 0.0449       | -1.09 q < 0.568       | -1.01 q < 1       | -1.25 q < 0.0306  |
| SLC25A37  | solute carrier family 25, member 37                                                          | Ssc.21282.2.S1_at   | 1.19 q < 0.00576            | 1.59 q < 0.00196          | 1.13 q < 0.842         | 1.64 q < 0.000631     | -1.14 q < 1       | -1.1 q < 1        |
| C20orf199 | non-protein coding RNA 275                                                                   | Ssc.1256.1.A1_at    | 1.2 q < 0.0104              | -1.22 q < 0.837           | -1.05 q < 0.954        | 1.22 q < 0.414        | 1.54 q < 0.0324   | 1.68 q < 0.00154  |
| ZC3H11A   | zinc finger CCHC-type containing 11A                                                         | Ssc.19135.1.A1_at   | -1.1 q < 0.0114             | -1.31 q < 0.00394         | -1.34 q < 0.00117      | 1.1 q < 0.5           | -1.1 q < 1        | 1.07 q < 1        |
| IFI44L    | interferon-induced protein 44-like                                                           | Ssc.10588.1.A1_at   | -1.23 q < 0.0368            | -1.77 q < 0.0216          | -1.68 q < 0.0449       | -1.41 q < 0.247       | 1.33 q < 1        | 1.11 q < 1        |
| IFI44L    | interferon-induced protein 44-like                                                           | Ssc.10593.1.S1_at   | -1.14 q < 0.0935            | -1.57 q < 0.0111          | -1.43 q < 0.0752       | -1.18 q < 0.521       | 1.26 q < 1        | 1.07 q < 1        |
| IGK       | immunoglobulin kappa locus                                                                   | Ssc.11208.1.S1_at   | -1.46 q < 0                 | -1.04 q < 1               | 1.01 q < 0.996         | 1.07 q < 0.755        | 1 q < 1           | -6.98 q < 0       |
| IGLC1     | immunoglobulin lambda constant 1 (Mcg marker)                                                | Ssc.19946.1.S1_at   | -2.09 q < 0                 | 1.01 q < 1                | -1.05 q < 0.944        | 1.06 q < 0.816        | -1.03 q < 1       | -39.57 q < 0      |
| NAP1L3    | nucleosome assembly protein 1-like 3                                                         | Ssc.8352.1.A1_at    | -1.52 q < 0                 | -2.7 q < 0                | -1.36 q < 0.14         | -1.4 q < 0.0591       | -1.34 q < 0.351   | -1.17 q < 1       |
| IGHG      | -                                                                                            | Ssc.16359.2.S1_s_at | -1.53 q < 0.000000000000191 | 1.01 q < 1                | -1.06 q < 0.946        | 1 q < 0.992           | -1.03 q < 1       | -7.85 q < 0       |
| PLEKH8    | pleckstrin homology domain containing, family A (phosphoinositide binding specific) member 8 | Ssc.1878.1.S1_at    | -1.49 q < 0.000000000011    | -1.36 q < 0.243           | -2.14 q < 0.0000000996 | -1.3 q < 0.222        | -1.46 q < 0.0925  | -1.35 q < 0.271   |
| PLEKH8    | pleckstrin homology domain containing, family A (phosphoinositide binding specific) member 8 | Ssc.30797.1.S1_at   | -1.27 q < 0.0000074         | -1.06 q < 1               | -1.38 q < 0.0542       | -1.25 q < 0.23        | -1.51 q < 0.00643 | -1.18 q < 0.936   |
| TAF9B     | TAF9B RNA polymerase II, TATA box binding protein (TBP)-associated factor, 31kDa             | Ssc.27986.1.A1_at   | -1.28 q < 0.000000000759    | -1.78 q < 0.000000000076  | -1.13 q < 0.686        | -1.25 q < 0.0891      | -1.17 q < 0.951   | -1.16 q < 0.746   |
| MTUS1     | microtubule associated tumor suppressor 1                                                    | Ssc.1355.1.S1_at    | -1.41 q < 0.00000000126     | -2.13 q < 0.0000000251    | -1.24 q < 0.513        | -1.12 q < 0.65        | -1.42 q < 0.124   | -1.34 q < 0.227   |
| CALM2     | calmodulin 2 (phosphorylase kinase, delta)                                                   | Ssc.30607.1.A1_at   | -1.41 q < 0.00000000226     | -1.21 q < 0.807           | -1.31 q < 0.267        | -2 q < 0.0000000522   | -1.47 q < 0.0587  | -1.18 q < 1       |
| CALM2     | calmodulin 2 (phosphorylase kinase, delta)                                                   | Ssc.11516.1.S1_at   | -1.11 q < 0.0411            | 1.04 q < 1                | -1.13 q < 0.7          | -1.27 q < 0.0776      | -1.2 q < 0.744    | -1.02 q < 1       |
| C6orf150  | chromosome 6 open reading frame 150                                                          | Ssc.22696.1.S1_at   | -1.32 q < 0.00000000238     | -1.31 q < 0.11            | -1.26 q < 0.202        | -1.35 q < 0.0336      | -1.35 q < 0.0841  | -1.32 q < 0.0907  |
| PDE1A     | phosphodiesterase 1A, calmodulin-dependent                                                   | Ssc.9496.1.A1_at    | 1.24 q < 0.00000000263      | 1.04 q < 1                | 1.19 q < 0.243         | 1.61 q < 0.0000000211 | 1.2 q < 0.389     | 1.21 q < 0.212    |
| PDE1A     | phosphodiesterase 1A, calmodulin-dependent                                                   | Ssc.7144.1.S1_at    | -1.04 q < 0.709             | 1.36 q < 0.0144           | -1.16 q < 0.541        | -1.15 q < 0.401       | -1.25 q < 0.278   | 1 q < 1           |
| SRPX2     | sushi-repeat-containing protein, X-linked 2                                                  | Ssc.4899.1.S1_at    | -1.33 q < 0.000000003       | -2.13 q < 0.0000000000937 | -1.13 q < 0.777        | -1.05 q < 0.834       | -1.28 q < 0.401   | -1.28 q < 0.252   |
| IGJ       | immunoglobulin J polypeptide, linker protein for immunoglobulin alpha and mu polypeptides    | Ssc.16506.1.A1_at   | -1.4 q < 0.00000000504      | -1.06 q < 1               | 1.06 q < 0.943         | 1.01 q < 0.984        | 1.06 q < 1        | -5.88 q < 0       |
| EFR3A     | EFR3 homolog A (S. cerevisiae)                                                               | Ssc.10435.1.A1_at   | -1.36 q < 0.00000000563     | -1.31 q < 0.248           | -1.78 q < 0.0000153    | -1.2 q < 0.394        | -1.41 q < 0.0814  | -1.19 q < 0.903   |
| EFR3A     | EFR3 homolog A (S. cerevisiae)                                                               | Ssc.29551.1.A1_at   | 1.06 q < 0.497              | -1.04 q < 1               | -1.1 q < 0.804         | 1.32 q < 0.0185       | 1.04 q < 1        | 1.1 q < 1         |
| GRIP2     | glutamate receptor interacting protein 2                                                     | Ssc.6492.1.S1_at    | 1.21 q < 0.00000000685      | 1.36 q < 0.000441         | 1.2 q < 0.142          | 1.17 q < 0.17         | 1.17 q < 0.567    | 1.17 q < 0.354    |
| C6orf103  | chromosome 6 open reading frame 103                                                          | Ssc.3761.1.A1_at    | 1.61 q < 0.00000000924      | 2.39 q < 0.0000342        | 1.22 q < 0.82          | 1.46 q < 0.205        | 1.57 q < 0.27     | 1.62 q < 0.108    |
| C6orf103  | chromosome 6 open reading frame 103                                                          | Ssc.4492.1.A1_at    | -1.15 q < 0.0208            | -1.1 q < 1                | -1.45 q < 0.00876      | 1.08 q < 0.749        | -1.19 q < 1       | -1.12 q < 1       |
| RALA      | v-ral simian leukemia viral oncogene homolog A (ras related)                                 | Ssc.1560.1.S1_at    | -1.31 q < 0.0000000198      | -1.26 q < 0.314           | -1.48 q < 0.00385      | -1.24 q < 0.207       | -1.26 q < 0.531   | -1.33 q < 0.102   |
| RALA      | v-ral simian leukemia viral oncogene homolog A (ras related)                                 | Ssc.1560.2.S1_at    | -1.25 q < 0.000000035       | -1.2 q < 0.484            | -1.39 q < 0.00869      | -1.18 q < 0.317       | -1.23 q < 0.495   | -1.25 q < 0.224   |

| Gene Name | Gene Description                                                            | Probe Set ID        | Breed MS-WC           | Day 25 MS-WC              | Day 45 MS-WC         | Day 65 MS-WC      | Day 85 MS-WC       | Day 105 MS-WC       |
|-----------|-----------------------------------------------------------------------------|---------------------|-----------------------|---------------------------|----------------------|-------------------|--------------------|---------------------|
| NSD1      | nuclear receptor binding SET domain protein 1                               | Ssc.20770.1.S1_at   | 1.27 q < 0.000000023  | 1.61 q < 0.00000387       | 1.08 q < 0.886       | 1.24 q < 0.128    | 1.23 q < 0.501     | 1.23 q < 0.325      |
| HERPUD2   | HERPUD family member 2                                                      | Ssc.27248.1.S1_at   | -1.34 q < 0.000000313 | -1.27 q < 0.375           | -1.25 q < 0.374      | -1.37 q < 0.0508  | -1.49 q < 0.0142   | -1.32 q < 0.206     |
| COL6A1    | collagen, type VI, alpha 1                                                  | Ssc.5895.1.A2_at    | -1.69 q < 0.000000423 | -1.77 q < 0.0928          | -1.97 q < 0.0179     | -1.61 q < 0.145   | -1.42 q < 1        | -1.72 q < 0.125     |
| COL6A1    | collagen, type VI, alpha 1                                                  | Ssc.5895.1.A1_at    | -1.55 q < 0.00000603  | -1.63 q < 0.217           | -1.85 q < 0.039      | -1.42 q < 0.335   | -1.31 q < 1        | -1.58 q < 0.309     |
| COL6A1    | collagen, type VI, alpha 1                                                  | Ssc.21754.1.A1_at   | -1.24 q < 0.0151      | -1.35 q < 0.536           | -1.46 q < 0.177      | -1.16 q < 0.661   | -1.1 q < 1         | -1.15 q < 1         |
| GOLGB1    | golgin B1                                                                   | Ssc.31053.1.A1_at   | -1.24 q < 0.000000423 | -1.25 q < 0.123           | -1.26 q < 0.0781     | -1.38 q < 0.00269 | -1.22 q < 0.423    | -1.11 q < 1         |
| SLC20A1   | solute carrier family 20 (phosphate transporter), member 1                  | Ssc.1527.2.A1_at    | -1.6 q < 0.000000476  | -1.68 q < 0.0944          | -1.46 q < 0.336      | -1.23 q < 0.584   | -1.8 q < 0.0501    | -1.97 q < 0.00637   |
| TROVE2    | TROVE domain family, member 2                                               | Ssc.29839.1.A1_at   | 1.27 q < 0.000000562  | 1.27 q < 0.187            | 1.3 q < 0.0869       | 1.33 q < 0.0329   | 1.23 q < 0.555     | 1.24 q < 0.307      |
| MAP7D3    | MAP7 domain containing 3                                                    | Ssc.10722.1.A1_at   | 1.23 q < 0.000000621  | 1.19 q < 0.376            | 1.27 q < 0.057       | 1.31 q < 0.0143   | 1.2 q < 0.531      | 1.19 q < 0.391      |
| TXNDC13   | thioredoxin-related transmembrane protein 4                                 | Ssc.6827.1.A1_at    | -1.37 q < 0.000000837 | -1.25 q < 0.648           | -1.51 q < 0.0211     | -1.42 q < 0.0592  | -1.34 q < 0.42     | -1.36 q < 0.215     |
| ALOX5AP   | arachidonate 5-lipoxygenase-activating protein                              | Ssc.5822.1.S1_at    | -1.35 q < 0.000000989 | -1.19 q < 0.869           | -1.22 q < 0.548      | -1.26 q < 0.261   | -1.41 q < 0.117    | -1.72 q < 0.000121  |
| CSTA      | cystatin A (stefin A)                                                       | Ssc.645.1.S1_at     | -1.21 q < 0.000000116 | -1.07 q < 1               | 1.99 q < 0           | 1.2 q < 0.134     | 1.11 q < 1         | 1.06 q < 1          |
| CSTA      | cystatin A (stefin A)                                                       | Ssc.646.1.S1_at     | 1.13 q < 0.01116      | -1.02 q < 1               | 1.52 q < 0.0000743   | 1.02 q < 0.924    | 1.14 q < 1         | 1.07 q < 1          |
| OCIAD2    | OCIA domain containing 2                                                    | Ssc.22715.1.S1_at   | -1.6 q < 0.000000126  | -1.68 q < 0.104           | -1.89 q < 0.0159     | -1.6 q < 0.105    | -1.7 q < 0.142     | -1.2 q < 1          |
| SYN3      | synapsin III                                                                | Ssc.3880.1.S1_at    | -1.7 q < 0.000000136  | -1.61 q < 0.335           | -1.33 q < 0.731      | -1.59 q < 0.189   | -2.63 q < 0.000282 | -1.6 q < 0.367      |
| HTRA4     | HtrA serine peptidase 4                                                     | Ssc.7990.1.A1_at    | -1.4 q < 0.000000145  | -1.39 q < 0.221           | -1.63 q < 0.00708    | -1.3 q < 0.253    | -1.31 q < 0.769    | -1.38 q < 0.252     |
| LAMP2     | lysosomal-associated membrane protein 2                                     | Ssc.1955.1.A1_at    | -1.4 q < 0.000000157  | -1.23 q < 0.809           | -2.04 q < 0.00000053 | -1.21 q < 0.484   | -1.18 q < 1        | -1.5 q < 0.0533     |
| LAMP2     | lysosomal-associated membrane protein 2                                     | Ssc.1955.2.S1_at    | -1.08 q < 0.232       | -1 q < 1                  | -1.4 q < 0.00958     | 1.05 q < 0.839    | -1.07 q < 1        | -1.05 q < 1         |
| TEAD1     | TEA domain family member 1 (SV40 transcriptional enhancer factor)           | Ssc.13762.1.S1_at   | -1.42 q < 0.000000172 | -1.31 q < 0.554           | -1.64 q < 0.0114     | -1.48 q < 0.0637  | -1.46 q < 0.222    | -1.26 q < 0.856     |
| TEAD1     | TEA domain family member 1 (SV40 transcriptional enhancer factor)           | Ssc.2932.1.A1_at    | -1.09 q < 0.382       | -1.6 q < 0.00336          | -1.23 q < 0.53       | 1.27 q < 0.255    | 1.03 q < 1         | -1.04 q < 1         |
| GNA12     | guanine nucleotide binding protein (G protein) alpha 12                     | Ssc.17298.1.A1_at   | -1.31 q < 0.000000179 | 1.02 q < 1                | -1.8 q < 0.00000423  | -1.27 q < 0.198   | -1.31 q < 0.387    | -1.35 q < 0.12      |
| GNA12     | guanine nucleotide binding protein (G protein) alpha 12                     | Ssc.17298.2.S1_at   | -1.13 q < 0.0417      | 1.07 q < 1                | -1.42 q < 0.0199     | 1.06 q < 0.825    | -1.2 q < 1         | -1.24 q < 0.456     |
| SCARA3    | scavenger receptor class A, member 3                                        | Ssc.25203.1.S1_at   | -1.26 q < 0.000000207 | -1.28 q < 0.169           | -1.23 q < 0.283      | -1.23 q < 0.184   | -1.44 q < 0.00535  | -1.16 q < 0.917     |
| SSBP3     | single stranded DNA binding protein 3                                       | Ssc.3408.1.A1_at    | 1.21 q < 0.000000213  | 1.18 q < 0.399            | 1.11 q < 0.739       | 1.29 q < 0.015    | 1.27 q < 0.0806    | 1.23 q < 0.16       |
| KLHL24    | kelch-like 24 (Drosophila)                                                  | Ssc.29392.1.A1_at   | 1.35 q < 0.000000213  | 1.09 q < 1                | 1.41 q < 0.0764      | 1.55 q < 0.00643  | 1.39 q < 0.193     | 1.36 q < 0.201      |
| SYNPO2    | synaptopodin 2                                                              | Ssc.26929.1.S1_at   | -1.47 q < 0.000000263 | -3.38 q < 0.0000000000153 | -1.46 q < 0.196      | -1.21 q < 0.551   | 1.02 q < 1         | -1.19 q < 1         |
| C21orf66  | GC-rich sequence DNA-binding factor 1                                       | Ssc.7950.1.A1_at    | -1.21 q < 0.000000315 | -1.22 q < 0.191           | -1.12 q < 0.658      | -1.09 q < 0.584   | -1.43 q < 0.000295 | -1.22 q < 0.184     |
| PIN4      | protein (peptidylprolyl cis/trans isomerase) NIMA-interacting, 4 (parvulin) | Ssc.28431.1.A1_at   | 1.25 q < 0.00000034   | 1.08 q < 1                | 1.27 q < 0.123       | 1.51 q < 0.000137 | 1.24 q < 0.438     | 1.17 q < 0.738      |
| PIN4      | protein (peptidylprolyl cis/trans isomerase) NIMA-interacting, 4 (parvulin) | Ssc.18633.1.S1_at   | 1.21 q < 0.000368     | 1.05 q < 1                | 1.24 q < 0.403       | 1.5 q < 0.00409   | 1.26 q < 0.636     | 1.08 q < 1          |
| COL5A1    | collagen, type V, alpha 1                                                   | Ssc.9002.1.A1_at    | -1.75 q < 0.000000399 | -1.59 q < 0.471           | -1.9 q < 0.0852      | -1.63 q < 0.217   | -1.46 q < 1        | -2.28 q < 0.00953   |
| COL5A1    | collagen, type V, alpha 1                                                   | Ssc.16329.1.S1_at   | -1.15 q < 0.0956      | -1.63 q < 0.00662         | -1.14 q < 0.849      | -1.01 q < 0.979   | -1.03 q < 1        | -1.03 q < 1         |
| CD276     | CD276 molecule                                                              | Ssc.2042.1.S1_at    | -1.28 q < 0.000000418 | -1.49 q < 0.00329         | -1.33 q < 0.0949     | -1.08 q < 0.731   | -1.25 q < 0.585    | -1.3 q < 0.187      |
| Q9NX89    | -                                                                           | Ssc.3574.1.A1_at    | -1.32 q < 0.000000453 | -1.24 q < 0.611           | -1.51 q < 0.0108     | -1.36 q < 0.0818  | -1.27 q < 0.747    | -1.26 q < 0.531     |
| RPS2      | ribosomal protein S2                                                        | Ssc.12073.1.A1_at   | -1.18 q < 0.000000497 | 1.03 q < 1                | -1.22 q < 0.0641     | -1.2 q < 0.0706   | -1.11 q < 1        | -1.43 q < 0.0000066 |
| C7orf61   | chromosome 7 open reading frame 61                                          | Ssc.4346.1.A1_at    | 1.24 q < 0.000000524  | 1.15 q < 0.784            | 1.18 q < 0.434       | 1.33 q < 0.017    | 1.22 q < 0.516     | 1.3 q < 0.0631      |
| CCS       | copper chaperone for superoxide dismutase                                   | Ssc.15274.1.S1_a_at | -1.24 q < 0.00000059  | -1.01 q < 1               | -1.26 q < 0.15       | -1.25 q < 0.13    | -1.45 q < 0.0022   | -1.3 q < 0.0798     |
| FGF23     | fibroblast growth factor 23                                                 | Ssc.27685.1.S1_at   | -1.33 q < 0.000000624 | -1.84 q < 0.0000117       | -1.29 q < 0.305      | -1.16 q < 0.529   | -1.09 q < 1        | -1.37 q < 0.129     |
| BEX2      | brain expressed X-linked 2                                                  | Ssc.3714.1.S1_a_at  | -1.28 q < 0.00000065  | 1 q < 1                   | -1.49 q < 0.00332    | -1.24 q < 0.214   | -1.38 q < 0.0593   | -1.34 q < 0.0905    |
| ILF2      | interleukin enhancer binding factor 2, 45kDa                                | Ssc.27246.1.S1_at   | -1.32 q < 0.000000654 | -1.02 q < 1               | -1.66 q < 0.000749   | -1.37 q < 0.0793  | -1.29 q < 0.655    | -1.37 q < 0.128     |
| RNF19A    | ring finger protein 19A                                                     | Ssc.29466.1.A1_at   | 1.26 q < 0.000000697  | 1.05 q < 1                | 1.24 q < 0.275       | 1.38 q < 0.0149   | 1.32 q < 0.125     | 1.34 q < 0.0573     |
| FUT2      | fucosyltransferase 2 (secretor status included)                             | Ssc.243.1.S1_at     | 1.33 q < 0.000000708  | 1.1 q < 1                 | 1.32 q < 0.234       | 1.57 q < 0.00367  | 1.29 q < 0.638     | 1.42 q < 0.0721     |
| RASSF6    | Ras association (RalGDS/AF-6) domain family member 6                        | Ssc.27147.1.A1_at   | 1.24 q < 0.000000777  | 1.12 q < 1                | 1.3 q < 0.0722       | 1.52 q < 0.000118 | 1.2 q < 0.752      | 1.1 q < 1           |
| RASSF6    | Ras association (RalGDS/AF-6) domain family member 6                        | Ssc.9286.1.A1_at    | 1.16 q < 0.0145       | 1.06 q < 1                | 1.23 q < 0.413       | 1.41 q < 0.0231   | 1.03 q < 1         | 1.1 q < 1           |
| Q8IXQ9    | -                                                                           | Ssc.24915.1.S1_at   | 1.26 q < 0.000000791  | 1.29 q < 0.158            | 1.1 q < 0.854        | 1.38 q < 0.0194   | 1.34 q < 0.0873    | 1.21 q < 0.545      |

| Gene Name | Gene Description                                                                   | Probe Set ID       | Breed MS-WC          | Day 25 MS-WC         | Day 45 MS-WC        | Day 65 MS-WC       | Day 85 MS-WC         | Day 105 MS-WC        |
|-----------|------------------------------------------------------------------------------------|--------------------|----------------------|----------------------|---------------------|--------------------|----------------------|----------------------|
| BBS4      | Bardet-Biedl syndrome 4                                                            | Ssc.15249.1.S1_at  | 1.21 q < 0.00000808  | 1.11 q < 0.987       | 1.2 q < 0.281       | 1.29 q < 0.0325    | 1.25 q < 0.187       | 1.23 q < 0.183       |
| VPS26B    | vacuolar protein sorting 26 homolog B ( <i>S. pombe</i> )                          | Ssc.20621.1.S1_at  | -1.2 q < 0.00000996  | -1.16 q < 0.564      | -1.5 q < 0.0000122  | -1.07 q < 0.69     | -1.2 q < 0.454       | -1.13 q < 0.923      |
| IDI1      | isopentenyl-diphosphate delta isomerase 1                                          | Ssc.6714.1.A1_at   | 1.41 q < 0.0000103   | 1.45 q < 0.18        | 1.09 q < 0.934      | 1.83 q < 0.000966  | 1.37 q < 0.636       | 1.41 q < 0.288       |
| ARL5A     | ADP-ribosylation factor-like 5A                                                    | Ssc.27149.1.S1_at  | -1.48 q < 0.0000011  | -1.13 q < 1          | -1.75 q < 0.0208    | -1.43 q < 0.212    | -1.58 q < 0.202      | -1.61 q < 0.0911     |
| DDX21     | DEAD (Asp-Glu-Ala-Asp) box polypeptide 21                                          | Ssc.20522.1.S1_at  | -1.33 q < 0.0000012  | -1.29 q < 0.429      | -1.49 q < 0.0232    | -1.23 q < 0.364    | -1.27 q < 0.836      | -1.38 q < 0.139      |
| GPR107    | G protein-coupled receptor 107                                                     | Ssc.26127.1.S1_at  | -1.23 q < 0.00000134 | -1.04 q < 1          | -1.35 q < 0.0167    | -1.2 q < 0.244     | -1.32 q < 0.0605     | -1.26 q < 0.16       |
| SF3B2     | splicing factor 3b, subunit 2, 145kDa                                              | Ssc.5474.1.S1_at   | -1.27 q < 0.00000138 | -1.16 q < 0.918      | -1.4 q < 0.0229     | -1.14 q < 0.524    | -1.34 q < 0.145      | -1.34 q < 0.091      |
| TDRD3     | tudor domain containing 3                                                          | Ssc.28339.1.A1_at  | 1.21 q < 0.00000165  | 1.12 q < 0.901       | 1.18 q < 0.361      | 1.3 q < 0.0178     | 1.23 q < 0.299       | 1.21 q < 0.305       |
| TDRD3     | tudor domain containing 3                                                          | Ssc.14320.1.A1_at  | -1.18 q < 0.0228     | -1.36 q < 0.217      | -1.19 q < 0.706     | -1.14 q < 0.607    | -1.06 q < 1          | -1.15 q < 1          |
| UBR2      | ubiquitin protein ligase E3 component n-recogin 2                                  | Ssc.22803.1.S1_at  | -1.29 q < 0.00000184 | -1.55 q < 0.00219    | -1.22 q < 0.474     | -1.15 q < 0.532    | -1.3 q < 0.42        | -1.26 q < 0.482      |
| GBE1      | glucan (1,4-alpha-), branching enzyme 1                                            | Ssc.8684.1.A1_at   | -1.28 q < 0.00000184 | -1.18 q < 0.819      | -1.41 q < 0.0288    | -1.32 q < 0.0902   | -1.27 q < 0.564      | -1.22 q < 0.613      |
| SEC31A    | SEC31 homolog A ( <i>S. cerevisiae</i> )                                           | Ssc.11165.3.A1_at  | -1.34 q < 0.00000186 | -1.46 q < 0.0637     | -1.52 q < 0.0223    | -1.13 q < 0.65     | -1.22 q < 1          | -1.4 q < 0.136       |
| SEC31A    | SEC31 homolog A ( <i>S. cerevisiae</i> )                                           | Ssc.21334.1.S1_at  | 1.2 q < 0.0101       | -1.15 q < 1          | 1.15 q < 0.828      | 1.53 q < 0.017     | 1.24 q < 1           | 1.31 q < 0.458       |
| SEC31A    | SEC31 homolog A ( <i>S. cerevisiae</i> )                                           | Ssc.11165.2.S1_at  | -1.3 q < 0.00059     | -1.26 q < 0.853      | -1.56 q < 0.0645    | -1.18 q < 0.599    | -1.16 q < 1          | -1.41 q < 0.325      |
| SEC31A    | SEC31 homolog A ( <i>S. cerevisiae</i> )                                           | Ssc.11165.1.S1_at  | -1.17 q < 0.00347    | -1.25 q < 0.38       | -1.28 q < 0.186     | -1.03 q < 0.916    | -1.22 q < 0.927      | -1.11 q < 1          |
| NPC2      | Niemann-Pick disease, type C2                                                      | Ssc.529.1.S1_at    | -1.5 q < 0.00000189  | -1.27 q < 0.954      | -1.32 q < 0.612     | -2.14 q < 0.000453 | -1.3 q < 1           | -1.62 q < 0.113      |
| LSAMP     | limbic system-associated membrane protein                                          | Ssc.24997.1.S1_at  | -1.24 q < 0.00000203 | -1.64 q < 0.00000863 | -1.06 q < 0.93      | -1.2 q < 0.268     | -1.16 q < 1          | -1.22 q < 0.41       |
| LSAMP     | limbic system-associated membrane protein                                          | Ssc.24997.2.A1_at  | -1.22 q < 0.00000616 | -1.37 q < 0.0472     | -1.1 q < 0.872      | -1.27 q < 0.145    | -1.19 q < 1          | -1.2 q < 0.673       |
| MRPL16    | mitochondrial ribosomal protein L16                                                | Ssc.2526.1.S1_at   | -1.31 q < 0.00000234 | -1.08 q < 1          | -1.83 q < 0.00002   | -1.18 q < 0.494    | -1.24 q < 1          | -1.35 q < 0.197      |
| SLC16A3   | solute carrier family 16, member 3 (monocarboxylic acid transporter 4)             | Ssc.22067.1.A1_at  | 1.18 q < 0.00000237  | 1.75 q < 0           | 1.04 q < 0.94       | 1.15 q < 0.281     | -1.01 q < 1          | 1.09 q < 1           |
| NEK5      | NIMA (never in mitosis gene a)-related kinase 5                                    | Ssc.1742.1.S1_at   | -1.32 q < 0.0000025  | -1.29 q < 0.432      | -1.46 q < 0.0373    | -1.3 q < 0.211     | -1.23 q < 1          | -1.34 q < 0.255      |
| SLC7A10   | solute carrier family 7, (neutral amino acid transporter, y+ system) member 10     | Ssc.21270.1.S1_at  | -1.42 q < 0.00000251 | -1.14 q < 1          | -1.38 q < 0.327     | -1.49 q < 0.0922   | -2.1 q < 0.0000797   | -1.16 q < 1          |
| SF3B5     | splicing factor 3b, subunit 5, 10kDa                                               | Ssc.7328.1.S1_at   | -1.31 q < 0.00000252 | -1.12 q < 1          | -1.41 q < 0.0607    | -1.47 q < 0.017    | -1.19 q < 1          | -1.37 q < 0.131      |
| C1R       | complement component 1, r subcomponent                                             | Ssc.983.1.S1_at    | -1.74 q < 0.00000255 | -1.45 q < 0.842      | -1.82 q < 0.172     | -1.76 q < 0.156    | -1.55 q < 1          | -2.23 q < 0.0243     |
| PIPSK3    | phosphoinositide kinase, FYVE finger containing                                    | Ssc.7559.1.A1_at   | -1.26 q < 0.00000258 | -1.32 q < 0.125      | -1.23 q < 0.381     | -1.05 q < 0.834    | -1.43 q < 0.0172     | -1.31 q < 0.151      |
| SLC15A3   | solute carrier family 15, member 3                                                 | Ssc.2037.1.S1_at   | 1.37 q < 0.00000319  | 1.05 q < 1           | 1.31 q < 0.406      | 1.17 q < 0.595     | 1.28 q < 1           | 2.34 q < 0.000000348 |
| MYL6      | myosin, light chain 6, alkali, smooth muscle and non-muscle                        | Ssc.10613.1.A1_at  | -1.23 q < 0.00000325 | -1.02 q < 1          | -1.15 q < 0.625     | -1.17 q < 0.344    | -1.62 q < 0.00000798 | -1.25 q < 0.24       |
| MPP7      | membrane protein, palmitoylated 7 (MAGUK p55 subfamily member 7)                   | Ssc.14264.1.A1_at  | -1.51 q < 0.00000336 | -1.37 q < 0.681      | -1.53 q < 0.222     | -1.73 q < 0.0365   | -1.39 q < 1          | -1.54 q < 0.259      |
| MPP7      | chromatin assembly factor 1, subunit B (p60)                                       | Ssc.14264.1.A1_at  | -1.51 q < 0.00000336 | -1.37 q < 0.681      | -1.53 q < 0.222     | -1.73 q < 0.0365   | -1.39 q < 1          | -1.54 q < 0.259      |
| PM20D2    | peptidase M20 domain containing 2                                                  | Ssc.3479.1.A1_at   | -1.3 q < 0.00000342  | -1.29 q < 0.336      | -1.08 q < 0.925     | -1.28 q < 0.215    | -1.51 q < 0.0142     | -1.36 q < 0.136      |
| PM20D2    | peptidase M20 domain containing 2                                                  | Ssc.21928.1.A1_at  | -1.33 q < 0.0000228  | -1.32 q < 0.484      | -1.26 q < 0.548     | -1.29 q < 0.295    | -1.5 q < 0.0992      | -1.29 q < 0.653      |
| CHRD2     | chordin-like 2                                                                     | Ssc.26080.1.A1_at  | -1.22 q < 0.00000343 | -1.21 q < 0.376      | -1.36 q < 0.0128    | -1.12 q < 0.523    | -1.28 q < 0.163      | -1.14 q < 0.934      |
| Q86T68    | -                                                                                  | Ssc.5700.1.S1_at   | -1.31 q < 0.00000349 | -1.46 q < 0.0431     | -1.25 q < 0.457     | -1.34 q < 0.123    | -1.23 q < 1          | -1.28 q < 0.47       |
| HOXB8     | homeobox B8                                                                        | Ssc.22848.1.S1_at  | -1.24 q < 0.00000361 | -1.13 q < 0.989      | -1.57 q < 0.0000956 | -1.12 q < 0.57     | -1.12 q < 1          | -1.31 q < 0.087      |
| GPHN      | gephyrin                                                                           | Ssc.25182.1.A1_at  | -1.26 q < 0.00000406 | -1.38 q < 0.0439     | -1.22 q < 0.425     | -1.27 q < 0.146    | -1.35 q < 0.103      | -1.09 q < 1          |
| TTC27     | tetratricopeptide repeat domain 27                                                 | Ssc.27202.1.A1_at  | 1.2 q < 0.0000059    | 1.25 q < 0.148       | 1.14 q < 0.621      | 1.16 q < 0.326     | 1.32 q < 0.0379      | 1.15 q < 0.775       |
| RBX1      | ring-box 1                                                                         | Ssc.18792.1.A1_at  | 1.22 q < 0.00000618  | 1.23 q < 0.31        | 1.12 q < 0.75       | 1.32 q < 0.0298    | 1.22 q < 0.621       | 1.22 q < 0.391       |
| KTELC1    | KTEL (Lys-Tyr-Glu-Leu) containing 1                                                | Ssc.2008.1.A1_a_at | -1.26 q < 0.00000621 | -1.3 q < 0.185       | -1.39 q < 0.0346    | -1.21 q < 0.321    | -1.36 q < 0.106      | -1.06 q < 1          |
| KIAA0494  | KIAA0494                                                                           | Ssc.19401.2.A1_at  | -1.3 q < 0.0000074   | -1.38 q < 0.14       | -1.46 q < 0.0353    | -1.12 q < 0.646    | -1.34 q < 0.37       | -1.23 q < 0.786      |
| KIAA0494  | KIAA0494                                                                           | Ssc.19401.1.S1_at  | -1.26 q < 0.000529   | -1.25 q < 0.693      | -1.37 q < 0.19      | -1.23 q < 0.417    | -1.17 q < 1          | -1.29 q < 0.565      |
| PARD3B    | par-3 partitioning defective 3 homolog B ( <i>C. elegans</i> )                     | Ssc.15329.2.S1_at  | -1.29 q < 0.00000817 | -1.08 q < 1          | -1.44 q < 0.0416    | -1.2 q < 0.428     | -1.4 q < 0.149       | -1.4 q < 0.0899      |
| PARD3B    | par-3 partitioning defective 3 homolog B ( <i>C. elegans</i> )                     | Ssc.11292.1.A1_at  | 1.16 q < 0.013       | 1.13 q < 1           | 1.09 q < 0.899      | 1.06 q < 0.805     | 1.21 q < 1           | 1.34 q < 0.131       |
| SCSDL     | sterol-C5-desaturase (ERG3 delta-5-desaturase homolog, <i>S. cerevisiae</i> )-like | Ssc.15727.1.A1_at  | 1.56 q < 0.00000842  | 1.49 q < 0.521       | 1.11 q < 0.94       | 2.46 q < 0.000325  | 1.44 q < 1           | 1.58 q < 0.36        |
| MLL       | myeloid/lymphoid or mixed-lineage leukemia (trithorax homolog, <i>Drosophila</i> ) | Ssc.3659.1.S1_at   | 1.18 q < 0.00000897  | 1.33 q < 0.00567     | 1.1 q < 0.783       | 1.15 q < 0.325     | 1.15 q < 1           | 1.19 q < 0.325       |
| MLL       | myeloid/lymphoid or mixed-lineage leukemia (trithorax homolog, <i>Drosophila</i> ) | Ssc.27953.1.S1_at  | 1.14 q < 0.00459     | 1.18 q < 0.515       | 1.1 q < 0.828       | 1.17 q < 0.317     | 1.11 q < 1           | 1.13 q < 1           |

| Gene Name | Gene Description                                                                                      | Probe Set ID        | Breed MS-WC         | Day 25 MS-WC         | Day 45 MS-WC       | Day 65 MS-WC          | Day 85 MS-WC     | Day 105 MS-WC           |
|-----------|-------------------------------------------------------------------------------------------------------|---------------------|---------------------|----------------------|--------------------|-----------------------|------------------|-------------------------|
| KIAA0907  | KIAA0907                                                                                              | Ssc.25140.1.A1_at   | 1.24 q < 0.00000924 | 1.1 q < 1            | 1.13 q < 0.791     | 1.47 q < 0.00271      | 1.26 q < 0.519   | 1.29 q < 0.18           |
| KIAA0907  | KIAA0907                                                                                              | Ssc.7902.1.A1_at    | 1.17 q < 0.000137   | 1.14 q < 0.807       | 1.2 q < 0.243      | 1.2 q < 0.165         | 1.18 q < 0.769   | 1.12 q < 1              |
| SYNJ1     | synaptotaxin 1                                                                                        | Ssc.24586.1.S1_at   | -1.27 q < 0.0000933 | -1.15 q < 1          | -1.28 q < 0.253    | -1.21 q < 0.345       | -1.31 q < 0.372  | -1.41 q < 0.0422        |
| MGC29506  | -                                                                                                     | Ssc.23658.1.S1_at   | -1.19 q < 0.0000096 | -1.04 q < 1          | -1.09 q < 0.842    | -1.06 q < 0.768       | -1.01 q < 1      | -2.01 q < 0             |
| GTF3A     | general transcription factor IIIA                                                                     | Ssc.8694.1.A1_at    | -1.2 q < 0.0000102  | -1.17 q < 0.579      | -1.23 q < 0.155    | -1.06 q < 0.744       | -1.31 q < 0.0421 | -1.22 q < 0.249         |
| RNF216    | ring finger protein 216                                                                               | Ssc.20827.1.S1_at   | -1.19 q < 0.0000112 | -1.17 q < 0.567      | -1.36 q < 0.00539  | -1.26 q < 0.0555      | -1.24 q < 0.252  | 1.03 q < 1              |
| G6PD      | glucose-6-phosphate dehydrogenase                                                                     | Ssc.2570.1.A1_at    | 1.24 q < 0.0000113  | 1.28 q < 0.247       | 1.2 q < 0.495      | 1.09 q < 0.692        | 1.48 q < 0.00528 | 1.2 q < 0.685           |
| Q9HAZ8    | -                                                                                                     | Ssc.10308.1.A1_at   | 1.31 q < 0.0000116  | 1.48 q < 0.0441      | 1.13 q < 0.87      | 1.4 q < 0.0828        | 1.23 q < 1       | 1.34 q < 0.282          |
| CHM       | choroideremia (Rab escort protein 1)                                                                  | Ssc.30885.1.A1_at   | -1.21 q < 0.000012  | -1.26 q < 0.142      | -1.34 q < 0.0192   | -1.12 q < 0.535       | -1.16 q < 1      | -1.16 q < 0.788         |
| TAP1      | transporter 1, ATP-binding cassette, sub-family B (MDR/TAP)                                           | Ssc.27863.1.S1_at   | -1.27 q < 0.0000122 | -1.01 q < 1          | -1.34 q < 0.143    | -1.58 q < 0.00141     | -1.12 q < 1      | -1.41 q < 0.0537        |
| HHATL     | hedgehog acyltransferase-like                                                                         | Ssc.29133.1.S1_at   | 1.18 q < 0.0000128  | 1.08 q < 1           | 1.24 q < 0.107     | 1.41 q < 0.000318     | 1.08 q < 1       | 1.14 q < 0.807          |
| VIM       | vimentin                                                                                              | Ssc.11131.1.S1_at   | -1.55 q < 0.0000136 | 1.03 q < 1           | -1.52 q < 0.357    | -1.59 q < 0.175       | -1.61 q < 0.477  | -2.36 q < 0.00104       |
| TMEM97    | transmembrane protein 97                                                                              | Ssc.13777.2.S1_at   | 1.34 q < 0.0000143  | 1.46 q < 0.113       | 1.15 q < 0.849     | 1.83 q < 0.000318     | 1.25 q < 1       | 1.11 q < 1              |
| ZFPM2     | zinc finger protein, multitype 2                                                                      | Ssc.30847.1.A1_at   | -1.24 q < 0.0000143 | -1.8 q < 0.00000575  | -1.04 q < 0.958    | -1.16 q < 0.476       | -1.16 q < 1      | -1.18 q < 0.828         |
| FAM82A1   | family with sequence similarity 82, member A1                                                         | Ssc.7751.1.A1_at    | 1.21 q < 0.0000144  | 1.09 q < 1           | 1.19 q < 0.412     | 1.34 q < 0.0154       | 1.16 q < 1       | 1.26 q < 0.136          |
| Q98TR0    | -                                                                                                     | Ssc.16710.1.S1_at   | -1.17 q < 0.0000146 | -1.12 q < 0.832      | -1.26 q < 0.0402   | -1.16 q < 0.256       | -1.16 q < 0.842  | -1.17 q < 0.481         |
| SHANK1    | SH3 and multiple ankyrin repeat domains 1                                                             | Ssc.10878.1.A1_at   | -1.22 q < 0.000015  | -1.76 q < 0.00000708 | -1.19 q < 0.447    | -1.09 q < 0.668       | -1.03 q < 1      | -1.15 q < 0.99          |
| CCL15     | chemokine (C-C motif) ligand 15                                                                       | Ssc.9803.1.A1_at    | -1.3 q < 0.000016   | -1.15 q < 1          | -1.19 q < 0.687    | -1.06 q < 0.849       | -1.37 q < 0.294  | -1.84 q < 0.0000255     |
| MRPS25    | mitochondrial ribosomal protein S25                                                                   | Ssc.19906.1.S1_at   | 1.23 q < 0.000016   | 1.31 q < 0.108       | 1.07 q < 0.913     | 1.48 q < 0.00148      | 1.2 q < 0.921    | 1.12 q < 1              |
| OSBP1A    | oxysterol binding protein-like 1A                                                                     | Ssc.24762.1.A1_at   | -1.34 q < 0.000016  | 1.09 q < 1           | -1.87 q < 0.000192 | -1.37 q < 0.159       | -1.31 q < 0.861  | -1.38 q < 0.267         |
| EBNA1BP2  | EBNA1 binding protein 2                                                                               | Ssc.26271.1.S1_at   | 1.2 q < 0.0000166   | 1.05 q < 1           | 1.19 q < 0.387     | 1.41 q < 0.00247      | 1.25 q < 0.288   | 1.15 q < 0.87           |
| Q5VW16    | -                                                                                                     | Ssc.29093.1.S1_at   | -1.21 q < 0.000017  | -1.1 q < 1           | -1.34 q < 0.0232   | -1.19 q < 0.272       | -1.17 q < 1      | -1.26 q < 0.166         |
| CXCL9     | chemokine (C-X-C motif) ligand 9                                                                      | Ssc.26146.1.S1_at   | -1.32 q < 0.0000189 | -1.02 q < 1          | 1.1 q < 0.913      | 1.03 q < 0.937        | 1 q < 1          | -4.39 q < 0             |
| GNAL      | guanine nucleotide binding protein (G protein), alpha activating activity polypeptide, olfactory type | Ssc.23367.1.A1_at   | -1.2 q < 0.0000203  | -1.14 q < 0.824      | -1.15 q < 0.597    | -1.27 q < 0.0669      | -1.35 q < 0.0232 | -1.1 q < 1              |
| TEP1      | telomerase-associated protein 1                                                                       | Ssc.11401.1.A1_a_at | -1.3 q < 0.0000203  | -1.26 q < 0.567      | -1.14 q < 0.843    | -1.08 q < 0.787       | -1.47 q < 0.0688 | -1.61 q < 0.00428       |
| TEP1      | phosphatase and tensin homolog                                                                        | Ssc.11401.1.A1_a_at | -1.3 q < 0.0000203  | -1.26 q < 0.567      | -1.14 q < 0.843    | -1.08 q < 0.787       | -1.47 q < 0.0688 | -1.61 q < 0.00428       |
| CRTAP     | cartilage associated protein                                                                          | Ssc.3508.1.A1_at    | -1.17 q < 0.0000206 | -1.27 q < 0.0381     | -1.24 q < 0.0761   | -1.06 q < 0.721       | -1.09 q < 1      | -1.21 q < 0.191         |
| C15       | complement component 1, s subcomponent                                                                | Ssc.1177.1.S1_at    | -1.56 q < 0.000021  | -1.35 q < 0.928      | -1.91 q < 0.0467   | -1.71 q < 0.11        | -1.37 q < 1      | -1.55 q < 0.491         |
| BCL2L14   | BCL2-like 14 (apoptosis facilitator)                                                                  | Ssc.30065.1.A1_at   | -1.24 q < 0.0000212 | -1.42 q < 0.0205     | -1.28 q < 0.206    | -1.25 q < 0.199       | -1.26 q < 0.532  | -1.03 q < 1             |
| GSTM3     | glutathione S-transferase mu 3 (brain)                                                                | Ssc.12273.1.A1_at   | -1.35 q < 0.0000212 | -1.84 q < 0.000906   | -1.01 q < 0.997    | -1.31 q < 0.294       | -1.34 q < 0.804  | -1.39 q < 0.315         |
| TBL1X     | transducin (beta)-like 1X-linked                                                                      | Ssc.11444.1.S1_a_at | -1.32 q < 0.0000213 | -1.15 q < 1          | -1.38 q < 0.17     | -1.16 q < 0.585       | -1.37 q < 0.42   | -1.56 q < 0.0165        |
| TBL1X     | transducin (beta)-like 1X-linked                                                                      | Ssc.10389.1.A1_at   | 1.27 q < 0.02       | 1.49 q < 0.39        | 1.22 q < 0.834     | 1.51 q < 0.181        | -1.15 q < 1      | 1.41 q < 0.634          |
| FAM129C   | family with sequence similarity 129, member C                                                         | Ssc.6341.3.A1_at    | 1.2 q < 0.0000244   | 1.07 q < 1           | 1.26 q < 0.112     | 1.41 q < 0.00177      | 1.12 q < 1       | 1.15 q < 0.866          |
| MVK       | mevalonate kinase                                                                                     | Ssc.3345.1.A1_at    | 1.25 q < 0.0000265  | 1.33 q < 0.136       | -1.05 q < 0.951    | 1.35 q < 0.0608       | 1.26 q < 0.669   | 1.41 q < 0.0345         |
| MVK       | mevalonate kinase                                                                                     | Ssc.3345.2.S1_at    | 1.15 q < 0.0172     | 1.24 q < 0.496       | -1 q < 0.997       | 1.25 q < 0.226        | 1.13 q < 1       | 1.18 q < 0.926          |
| CLN3      | ceroid-lipofuscinosis, neuronal 3                                                                     | Ssc.19602.1.A1_at   | -1.19 q < 0.00003   | -1.12 q < 0.918      | -1.3 q < 0.0311    | -1.1 q < 0.571        | -1.23 q < 0.348  | -1.18 q < 0.489         |
| CLN3      | ceroid-lipofuscinosis, neuronal 3                                                                     | Ssc.19602.2.S1_at   | -1.23 q < 0.000137  | -1.21 q < 0.7        | -1.34 q < 0.118    | -1.13 q < 0.574       | -1.23 q < 0.951  | -1.27 q < 0.41          |
| ARL15     | ADP-ribosylation factor-like 15                                                                       | Ssc.8613.1.A1_at    | 1.24 q < 0.0000304  | -1.01 q < 1          | 1.26 q < 0.287     | 1.16 q < 0.482        | 1.26 q < 0.59    | 1.62 q < 0.00017        |
| ARL15     | ADP-ribosylation factor-like 15                                                                       | Ssc.14168.1.A1_at   | 1.11 q < 0.0265     | -1.01 q < 1          | 1.11 q < 0.738     | 1.07 q < 0.68         | 1.17 q < 0.842   | 1.2 q < 0.328           |
| PLXNA2    | plexin A2                                                                                             | Ssc.28314.1.S1_at   | 1.22 q < 0.0000308  | 1.13 q < 1           | 1.19 q < 0.513     | 1.35 q < 0.031        | 1.21 q < 0.892   | 1.24 q < 0.374          |
| IL34      | interleukin 34                                                                                        | Ssc.19637.1.S1_at   | 1.2 q < 0.0000354   | -1.12 q < 1          | 1.22 q < 0.301     | 1.52 q < 0.000137     | 1.25 q < 0.406   | 1.24 q < 0.291          |
| C1QC      | complement component 1, q subcomponent, C chain                                                       | Ssc.17316.1.S1_at   | -1.79 q < 0.0000359 | -1.06 q < 1          | -1.57 q < 0.601    | -1.41 q < 0.552       | 1 q < 1          | -7.76 q < 0.00000000271 |
| CAPG      | capping protein (actin filament), gelsolin-like                                                       | Ssc.18360.1.S1_at   | -1.27 q < 0.000036  | -1.03 q < 1          | -1.28 q < 0.34     | -1.99 q < 0.000000382 | 1.05 q < 1       | -1.35 q < 0.189         |
| RPL7A     | ribosomal protein L7a                                                                                 | Ssc.13304.1.A1_at   | -1.17 q < 0.0000366 | -1.03 q < 1          | -1.19 q < 0.253    | -1.22 q < 0.0908      | -1.07 q < 1      | -1.36 q < 0.00223       |
| NCK1      | NCK adaptor protein 1                                                                                 | Ssc.4565.1.A1_at    | 1.46 q < 0.0000385  | 1.62 q < 0.168       | 1.14 q < 0.913     | 1.9 q < 0.0116        | 1.5 q < 0.622    | 1.27 q < 1              |
| NCK1      | NCK adaptor protein 1                                                                                 | Ssc.10338.1.A1_at   | -1.17 q < 0.0204    | -1.14 q < 1          | -1.24 q < 0.459    | -1.17 q < 0.496       | -1.15 q < 1      | -1.13 q < 1             |

| Gene Name | Gene Description                                                                             | Probe Set ID       | Breed MS-WC         | Day 25 MS-WC         | Day 45 MS-WC       | Day 65 MS-WC        | Day 85 MS-WC     | Day 105 MS-WC         |
|-----------|----------------------------------------------------------------------------------------------|--------------------|---------------------|----------------------|--------------------|---------------------|------------------|-----------------------|
| MTSS1     | metastasis suppressor 1                                                                      | Ssc.7893.1.A1_at   | -1.43 q < 0.000396  | -1.51 q < 0.286      | -1.73 q < 0.0395   | -1.03 q < 0.947     | -1.38 q < 1      | -1.63 q < 0.115       |
| MTSS1     | metastasis suppressor 1                                                                      | Ssc.12805.1.A1_at  | 1.08 q < 0.0523     | -1.04 q < 1          | 1.07 q < 0.844     | 1.22 q < 0.0393     | -1.02 q < 1      | 1.2 q < 0.112         |
| FAM62B    | extended synaptotagmin-like protein 2                                                        | Ssc.1817.1.S1_at   | -1.35 q < 0.00004   | -1.36 q < 0.416      | -1.68 q < 0.0115   | -1.12 q < 0.718     | -1.46 q < 0.272  | -1.18 q < 1           |
| FAM62B    | extended synaptotagmin-like protein 2                                                        | Ssc.9284.1.S1_at   | -1.2 q < 0.0408     | -1.16 q < 1          | -1.3 q < 0.521     | -1 q < 1            | -1.25 q < 1      | -1.32 q < 0.676       |
| TRIM16    | tripartite motif-containing 16                                                               | Ssc.12463.1.A1_at  | -1.31 q < 0.0000443 | -1.36 q < 0.322      | -1.19 q < 0.747    | -1.36 q < 0.165     | -1.17 q < 1      | -1.52 q < 0.0448      |
| LRBA      | LPS-responsive vesicle trafficking, beach and anchor containing                              | Ssc.3206.1.S1_at   | -1.23 q < 0.000045  | -1.08 q < 1          | -1.51 q < 0.00151  | -1.1 q < 0.65       | -1.33 q < 0.155  | -1.17 q < 0.926       |
| PBRM1     | polybromo 1                                                                                  | Ssc.5809.1.A1_at   | -1.22 q < 0.0000452 | -1.18 q < 0.739      | -1.45 q < 0.0067   | -1.03 q < 0.903     | -1.28 q < 0.348  | -1.22 q < 0.562       |
| KIF13A    | kinesin family member 13A                                                                    | Ssc.26196.1.A1_at  | -1.22 q < 0.0000483 | -1.29 q < 0.153      | -1.29 q < 0.125    | 1.06 q < 0.782      | -1.38 q < 0.0376 | -1.23 q < 0.433       |
| RORC      | RAR-related orphan receptor C                                                                | Ssc.9081.1.S1_at   | -1.25 q < 0.0000483 | -1.05 q < 1          | -1.33 q < 0.135    | -1.26 q < 0.222     | -1.22 q < 1      | -1.42 q < 0.033       |
| TFRC      | transferrin receptor (p90, CD71)                                                             | Ssc.3753.1.S1_at   | 1.63 q < 0.000049   | 2.08 q < 0.0597      | 1.3 q < 0.837      | 2.3 q < 0.0116      | 1.28 q < 1       | 1.45 q < 0.931        |
| C12orf42  | chromosome 12 open reading frame 42                                                          | Ssc.31169.1.S1_at  | -1.21 q < 0.0000495 | -1.27 q < 0.195      | -1.44 q < 0.00406  | -1.08 q < 0.693     | -1.34 q < 0.0653 | 1.03 q < 1            |
| ABI3BP    | ABI family, member 3 (NESH) binding protein                                                  | Ssc.11207.1.A1_at  | -1.47 q < 0.0000495 | -3.13 q < 0.00000139 | -1.26 q < 0.787    | -1.25 q < 0.566     | -1.08 q < 1      | -1.28 q < 1           |
| SP100     | SP100 nuclear antigen                                                                        | Ssc.7207.2.A1_at   | 1.22 q < 0.0000546  | 1.04 q < 1           | 1.26 q < 0.216     | 1.36 q < 0.0249     | 1.34 q < 0.103   | 1.12 q < 1            |
| SP100     | SP100 nuclear antigen                                                                        | Ssc.26520.1.A1_at  | -1.2 q < 0.00105    | -1.28 q < 0.34       | -1.14 q < 0.799    | -1.21 q < 0.346     | -1.26 q < 0.682  | -1.14 q < 1           |
| PDXK      | pyridoxal (pyridoxine, vitamin B6) kinase                                                    | Ssc.11170.1.S1_at  | -1.24 q < 0.0000568 | 1.11 q < 1           | -1.55 q < 0.00131  | -1.19 q < 0.398     | -1.26 q < 0.607  | -1.37 q < 0.0572      |
| UBE3A     | ubiquitin protein ligase E3A                                                                 | Ssc.29211.1.A1_at  | 1.19 q < 0.0000578  | 1.05 q < 1           | 1.02 q < 0.982     | 1.41 q < 0.00215    | 1.25 q < 0.261   | 1.27 q < 0.122        |
| PLEKHA3   | pleckstrin homology domain containing, family A (phosphoinositide binding specific) member 3 | Ssc.25084.1.S1_at  | -1.2 q < 0.0000598  | -1.13 q < 0.962      | -1.3 q < 0.0676    | -1.08 q < 0.708     | -1.38 q < 0.0167 | -1.13 q < 1           |
| FDFT1     | farnesyl-diphosphate farnesyltransferase 1                                                   | Ssc.6418.1.S1_at   | 1.3 q < 0.0000606   | 1.72 q < 0.00127     | -1.09 q < 0.925    | 1.34 q < 0.188      | 1.37 q < 0.42    | 1.28 q < 0.643        |
| CSNK1E    | casein kinase 1, epsilon                                                                     | Ssc.28471.2.S1_at  | -1.17 q < 0.0000616 | -1.07 q < 1          | -1.15 q < 0.508    | -1.14 q < 0.354     | -1.29 q < 0.0409 | -1.19 q < 0.351       |
| CD46      | CD46 molecule, complement regulatory protein                                                 | Ssc.14518.1.S1_at  | 1.19 q < 0.000062   | 1.02 q < 1           | 1.16 q < 0.579     | 1.18 q < 0.317      | 1.44 q < 0.00235 | 1.22 q < 0.374        |
| PARVB     | parvin, beta                                                                                 | Ssc.21537.1.A1_at  | -1.32 q < 0.00007   | -1.05 q < 1          | -1.92 q < 0.000176 | -1.16 q < 0.61      | -1.51 q < 0.115  | -1.14 q < 1           |
| BPHL      | biphenyl hydrolase-like (serine hydrolase)                                                   | Ssc.2968.1.S1_at   | -1.55 q < 0.0000724 | -1.49 q < 0.642      | -2.19 q < 0.0115   | -1.19 q < 0.718     | -1.47 q < 1      | -1.58 q < 0.493       |
| VGLL4     | vestigial like 4 (Drosophila)                                                                | Ssc.6410.3.S1_at   | 1.35 q < 0.0000724  | 1.44 q < 0.244       | 1.05 q < 0.968     | 1.57 q < 0.0378     | 1.28 q < 1       | 1.45 q < 0.211        |
| YIPF1     | Yip1 domain family, member 1                                                                 | Ssc.1236.1.S1_at   | -1.22 q < 0.0000735 | -1.15 q < 0.921      | -1.47 q < 0.00454  | -1.04 q < 0.877     | -1.17 q < 1      | -1.33 q < 0.102       |
| ETV6      | ets variant 6                                                                                | Ssc.22398.1.A1_at  | -1.43 q < 0.0000746 | -1.93 q < 0.00875    | -1.34 q < 0.587    | -1.43 q < 0.265     | -1.16 q < 1      | -1.4 q < 0.671        |
| ETV6      | ets variant 6                                                                                | Ssc.8148.1.S1_at   | -1.15 q < 0.0392    | -1.23 q < 0.619      | -1.34 q < 0.148    | -1.11 q < 0.664     | -1.04 q < 1      | -1.06 q < 1           |
| OSGIN1    | oxidative stress induced growth inhibitor 1                                                  | Ssc.26696.1.S1_at  | 1.25 q < 0.0000781  | -1.01 q < 1          | 1.21 q < 0.559     | 1.67 q < 0.000213   | 1.27 q < 0.694   | 1.21 q < 0.815        |
| BBS2      | Bardet-Biedl syndrome 2                                                                      | Ssc.4843.1.A1_at   | -1.24 q < 0.0000792 | -1.66 q < 0.000155   | -1.17 q < 0.672    | -1.19 q < 0.4       | -1.17 q < 1      | -1.08 q < 1           |
| TCEAL3    | transcription elongation factor A (SII)-like 3                                               | Ssc.21736.1.S1_at  | 1.19 q < 0.0000804  | 1.07 q < 1           | 1.07 q < 0.913     | 1.6 q < 0.0000841   | 1.23 q < 0.513   | 1.08 q < 1            |
| IMP1      | histocompatibility (minor) 13                                                                | Ssc.17159.1.S1_at  | -1.31 q < 0.000083  | -1.03 q < 1          | -1.12 q < 0.901    | -1.17 q < 0.594     | -1.19 q < 1      | -2.45 q < 0.000000056 |
| AEBP1     | AE binding protein 1                                                                         | Ssc.16584.1.A1_at  | -1.63 q < 0.0000845 | -1.32 q < 1          | -2.33 q < 0.0165   | -1.57 q < 0.317     | -1.26 q < 1      | -1.86 q < 0.197       |
| AEBP1     | AE binding protein 1                                                                         | Ssc.11603.1.S1_at  | -1.25 q < 0.074     | 1.04 q < 1           | -1.9 q < 0.0285    | -1.18 q < 0.695     | -1.11 q < 1      | -1.25 q < 1           |
| MVD       | mevalonate (diphospho) decarboxylase                                                         | Ssc.4685.1.S1_at   | 1.3 q < 0.0000894   | 1.27 q < 0.671       | -1.11 q < 0.91     | 1.41 q < 0.105      | 1.53 q < 0.0587  | 1.51 q < 0.049        |
| DACT3     | dapper, antagonist of beta-catenin, homolog 3 (Xenopus laevis)                               | Ssc.3327.1.A1_at   | -1.16 q < 0.0000923 | -1.25 q < 0.0714     | -1.28 q < 0.0227   | -1.21 q < 0.102     | -1.08 q < 1      | 1.01 q < 1            |
| TM2D2     | TM2 domain containing 2                                                                      | Ssc.13904.1.S1_at  | -1.24 q < 0.0000945 | -1.12 q < 1          | -1.5 q < 0.00558   | -1.11 q < 0.662     | -1.29 q < 0.467  | -1.2 q < 0.785        |
| C1QB      | complement component 1, q subcomponent, B chain                                              | Ssc.11004.1.S1_at  | -1.8 q < 0.0000978  | -1.25 q < 1          | -1.53 q < 0.702    | -1.38 q < 0.611     | -1.04 q < 1      | -6.94 q < 0.000000066 |
| SLC44A5   | solute carrier family 44, member 5                                                           | Ssc.24894.1.S1_at  | 1.21 q < 0.0000993  | 1.05 q < 1           | 1.18 q < 0.548     | 1.43 q < 0.00535    | 1.23 q < 0.714   | 1.19 q < 0.714        |
| RSBN1L    | round spermatid basic protein 1-like                                                         | Ssc.13280.1.A1_at  | 1.26 q < 0.000103   | 1.05 q < 1           | 1.11 q < 0.881     | 1.56 q < 0.00351    | 1.34 q < 0.346   | 1.27 q < 0.47         |
| RSBN1L    | round spermatid basic protein 1-like                                                         | Ssc.10678.1.A1_at  | 1.09 q < 0.211      | 1.01 q < 1           | -1.02 q < 0.982    | 1.33 q < 0.0416     | 1.1 q < 1        | 1.06 q < 1            |
| TMOD3     | tropomodulin 3 (ubiquitous)                                                                  | Ssc.16363.1.S2_at  | -1.4 q < 0.000103   | -1.51 q < 0.262      | -1.77 q < 0.0218   | -1.54 q < 0.111     | -1.24 q < 1      | -1.05 q < 1           |
| TMOD3     | tropomodulin 3 (ubiquitous)                                                                  | Ssc.16363.1.S1_at  | -1.49 q < 0.0000188 | -1.35 q < 0.671      | -1.61 q < 0.0932   | -1.5 q < 0.147      | -1.59 q < 0.215  | -1.4 q < 0.56         |
| UBE2V1    | ubiquitin-conjugating enzyme E2 variant 1                                                    | Ssc.5681.1.S1_at   | -1.25 q < 0.000103  | -1.06 q < 1          | -1.55 q < 0.00344  | -1.11 q < 0.657     | -1.36 q < 0.196  | -1.2 q < 0.852        |
| UBE2V1    | ubiquitin-conjugating enzyme E2 variant 1                                                    | Ssc.19134.2.S1_at  | -1.16 q < 0.000574  | -1.12 q < 0.955      | -1.26 q < 0.0796   | -1.21 q < 0.165     | -1.06 q < 1      | -1.14 q < 0.867       |
| SAP18     | Sin3A-associated protein, 18kDa                                                              | Ssc.21860.2.S1_at  | -1.12 q < 0.000105  | 1.01 q < 1           | -1.07 q < 0.808    | -1.4 q < 0.00000925 | -1.09 q < 1      | -1.1 q < 0.893        |
| TSPAN32   | tetraspanin 32                                                                               | Ssc.1595.1.S1_a_at | 1.36 q < 0.000105   | 1.83 q < 0.00542     | 1.32 q < 0.533     | 1.24 q < 0.503      | 1.01 q < 1       | 1.57 q < 0.091        |
| EMP3      | epithelial membrane protein 3                                                                | Ssc.11016.1.S1_at  | -1.35 q < 0.000109  | -1.05 q < 1          | -1.39 q < 0.322    | -1.22 q < 0.524     | -1.42 q < 0.554  | -1.78 q < 0.00637     |

| Gene Name | Gene Description                                                                      | Probe Set ID        | Breed MS-WC        | Day 25 MS-WC      | Day 45 MS-WC      | Day 65 MS-WC      | Day 85 MS-WC      | Day 105 MS-WC      |
|-----------|---------------------------------------------------------------------------------------|---------------------|--------------------|-------------------|-------------------|-------------------|-------------------|--------------------|
| AKAP3     | A kinase (PRKA) anchor protein 3                                                      | Ssc.21834.1.S1_a_at | 1.2 q < 0.000126   | 1.1 q < 1         | 1.28 q < 0.132    | 1.38 q < 0.0144   | 1.16 q < 1        | 1.11 q < 1         |
| LARS      | leucyl-tRNA synthetase                                                                | Ssc.1127.1.A1_at    | 1.26 q < 0.000126  | 1.55 q < 0.00644  | 1.25 q < 0.457    | 1.3 q < 0.186     | 1.14 q < 1        | 1.09 q < 1         |
| SLC47A1   | solute carrier family 47, member 1                                                    | Ssc.27371.1.S1_at   | 1.48 q < 0.00014   | 1.27 q < 1        | 1.39 q < 0.588    | 2.47 q < 0.000304 | 1.15 q < 1        | 1.42 q < 0.781     |
| PPFIBP1   | PTPRF interacting protein, binding protein 1 (liprin beta 1)                          | Ssc.9449.1.A1_at    | -1.31 q < 0.000143 | -1.52 q < 0.077   | -1.74 q < 0.00359 | -1.19 q < 0.547   | -1.26 q < 1       | 1.01 q < 1         |
| PPFIBP1   | PTPRF interacting protein, binding protein 1 (liprin beta 1)                          | Ssc.11536.1.S1_at   | 1.11 q < 0.0315    | -1.05 q < 1       | 1.01 q < 0.989    | 1.16 q < 0.301    | 1.1 q < 1         | 1.34 q < 0.0102    |
| Q8N675    | -                                                                                     | Ssc.1609.1.A1_at    | -1.35 q < 0.000144 | -1.04 q < 1       | -1.26 q < 0.669   | -1.97 q < 0.00052 | -1.41 q < 0.617   | -1.24 q < 1        |
| DCN       | decorin                                                                               | Ssc.10245.2.A1_a_at | -1.54 q < 0.00015  | -1.39 q < 0.893   | -1.52 q < 0.47    | -1.53 q < 0.308   | -1.17 q < 1       | -2.32 q < 0.00659  |
| DCN       | decorin                                                                               | Ssc.12150.1.A1_at   | -1.13 q < 0.0152   | -1.35 q < 0.0267  | -1.11 q < 0.799   | -1.02 q < 0.917   | -1.02 q < 1       | -1.18 q < 0.711    |
| SOC55     | suppressor of cytokine signaling 5                                                    | Ssc.26942.1.S1_at   | -1.16 q < 0.000155 | -1.14 q < 0.789   | -1.35 q < 0.00393 | -1.11 q < 0.524   | -1.13 q < 1       | -1.1 q < 1         |
| MAZ       | MYC-associated zinc finger protein (purine-binding transcription factor)              | Ssc.12113.2.S1_at   | -1.17 q < 0.000158 | -1.08 q < 1       | -1.38 q < 0.00379 | -1.06 q < 0.771   | -1.22 q < 0.454   | -1.16 q < 0.768    |
| LYZ       | lysozyme                                                                              | Ssc.670.1.S1_at     | 1.67 q < 0.000163  | 1.02 q < 1        | 1.59 q < 0.529    | -1.17 q < 0.797   | 2.28 q < 0.0806   | 4.07 q < 0.0000906 |
| LYZ       | lysozyme                                                                              | Ssc.670.2.S1_at     | 1.1 q < 0.154      | 1.03 q < 1        | -1.08 q < 0.902   | 1.01 q < 0.957    | 1.19 q < 1        | 1.4 q < 0.0159     |
| PRPSAP1   | phosphoribosyl pyrophosphate synthetase-associated protein 1                          | Ssc.21552.2.S1_at   | -1.23 q < 0.000166 | -1.07 q < 1       | -1.29 q < 0.249   | -1.22 q < 0.34    | -1.55 q < 0.00387 | -1.1 q < 1         |
| HDAC4     | histone deacetylase 4                                                                 | Ssc.15312.1.S1_at   | -1.19 q < 0.00017  | -1.4 q < 0.00901  | -1.17 q < 0.533   | -1.12 q < 0.536   | -1.13 q < 1       | -1.15 q < 0.937    |
| PQLC3     | PQ loop repeat containing 3                                                           | Ssc.16722.1.S1_at   | -1.5 q < 0.00018   | -1.26 q < 1       | -2.09 q < 0.0168  | -1.27 q < 0.595   | -1.46 q < 1       | -1.58 q < 0.445    |
| PARP4     | poly (ADP-ribose) polymerase family, member 4                                         | Ssc.17953.1.S1_at   | -1.17 q < 0.000181 | -1.08 q < 1       | -1.14 q < 0.603   | -1.12 q < 0.51    | -1.22 q < 0.444   | -1.31 q < 0.0322   |
| HPGD      | hydroxyprostaglandin dehydrogenase 15-(NAD)                                           | Ssc.15266.1.S1_at   | 2.25 q < 0.000182  | 1.36 q < 1        | 3.52 q < 0.0646   | 4.76 q < 0.00617  | 1.48 q < 1        | 1.71 q < 1         |
| HPGD      | hydroxyprostaglandin dehydrogenase 15-(NAD)                                           | Ssc.15266.2.S1_at   | 1.15 q < 0.05      | -1.04 q < 1       | 1.22 q < 0.556    | 1.43 q < 0.0408   | 1.17 q < 1        | 1.03 q < 1         |
| ZNF354A   | zinc finger protein 354A                                                              | Ssc.27217.2.A1_at   | 1.25 q < 0.000184  | 1.16 q < 1        | 1.19 q < 0.645    | 1.47 q < 0.0172   | 1.22 q < 1        | 1.22 q < 0.793     |
| ZNF354A   | zinc finger protein 354A                                                              | Ssc.27217.1.A1_at   | 1.12 q < 0.00822   | 1.03 q < 1        | 1.17 q < 0.366    | 1.23 q < 0.0806   | 1.06 q < 1        | 1.11 q < 1         |
| C10orf76  | chromosome 10 open reading frame 76                                                   | Ssc.10285.1.A1_at   | -1.38 q < 0.00019  | -1.09 q < 1       | -1.98 q < 0.00217 | -1.07 q < 0.861   | -1.48 q < 0.496   | -1.45 q < 0.397    |
| SLC1A3    | solute carrier family 1 (glial high affinity glutamate transporter), member 3         | Ssc.26957.1.S1_at   | 1.33 q < 0.000203  | 1.07 q < 1        | 1.25 q < 0.663    | 1.89 q < 0.00105  | 1.36 q < 0.823    | 1.22 q < 1         |
| SLC1A3    | solute carrier family 1 (glial high affinity glutamate transporter), member 3         | Ssc.8447.1.A1_at    | 1.12 q < 0.497     | -1.03 q < 1       | -1.19 q < 0.858   | 1.69 q < 0.0448   | 1.12 q < 1        | 1.15 q < 1         |
| CCDC142   | coiled-coil domain containing 142                                                     | Ssc.15679.1.A1_at   | 1.27 q < 0.000208  | 1.26 q < 0.652    | 1.04 q < 0.973    | 1.43 q < 0.0631   | 1.52 q < 0.0447   | 1.17 q < 1         |
| THY1      | thymocyte nuclear protein 1                                                           | Ssc.12072.1.S1_a_at | -1.52 q < 0.00021  | -1.13 q < 1       | -2.09 q < 0.0237  | -1.68 q < 0.159   | -1.4 q < 1        | -1.47 q < 0.775    |
| HSF2BP    | heat shock transcription factor 2 binding protein                                     | Ssc.18482.1.S1_at   | -1.2 q < 0.000221  | -1.11 q < 1       | -1.35 q < 0.0402  | -1.1 q < 0.636    | -1.18 q < 1       | -1.28 q < 0.197    |
| CCDC84    | coiled-coil domain containing 84                                                      | Ssc.6964.1.A1_at    | 1.18 q < 0.00023   | 1.25 q < 0.197    | 1.04 q < 0.946    | 1.3 q < 0.044     | 1.24 q < 0.393    | 1.09 q < 1         |
| IL18BP    | interleukin 18 binding protein                                                        | Ssc.16985.1.S1_at   | -1.19 q < 0.000234 | -1.11 q < 1       | -1.16 q < 0.57    | -1.14 q < 0.484   | -1.43 q < 0.00528 | -1.12 q < 1        |
| PTGS1     | prostaglandin-endoperoxide synthase 1 (prostaglandin G/H synthase and cyclooxygenase) | Ssc.1986.1.S1_at    | -1.42 q < 0.000235 | -1.27 q < 1       | -1.41 q < 0.488   | -1.62 q < 0.109   | -1.14 q < 1       | -1.79 q < 0.0494   |
| FBN1      | fibrillin 1                                                                           | Ssc.27981.1.A1_at   | 1.24 q < 0.000241  | -1.05 q < 1       | 1.29 q < 0.263    | 1.43 q < 0.0316   | 1.31 q < 0.452    | 1.27 q < 0.49      |
| SH3GL3    | SH3-domain GRB2-like 3                                                                | Ssc.5165.1.S1_at    | 1.3 q < 0.000247   | 1.04 q < 1        | 1.41 q < 0.177    | 1.51 q < 0.041    | 1.34 q < 0.724    | 1.23 q < 0.967     |
| HBZ       | hemoglobin, zeta                                                                      | Ssc.15708.1.S1_at   | 1.21 q < 0.000256  | 1.71 q < 0.000227 | 1.2 q < 0.493     | 1.04 q < 0.862    | 1.07 q < 1        | 1.12 q < 1         |
| HBZ       | hemoglobin, zeta                                                                      | Ssc.21870.2.S1_a_at | -1.02 q < 0.959    | 1.42 q < 0.123    | -1.56 q < 0.0147  | -1.08 q < 0.796   | 1 q < 1           | 1.09 q < 1         |
| ACBD3     | acyl-CoA binding domain containing 3                                                  | Ssc.9039.2.S1_at    | -1.3 q < 0.000263  | -1.55 q < 0.0456  | -1.45 q < 0.126   | -1.28 q < 0.349   | -1.3 q < 1        | 1.02 q < 1         |
| GRAMD3    | GRAM domain containing 3                                                              | Ssc.5080.1.A1_at    | -1.39 q < 0.000274 | -1.02 q < 1       | -2.04 q < 0.00282 | -1.19 q < 0.65    | -1.6 q < 0.256    | -1.33 q < 0.893    |
| GRAMD3    | GRAM domain containing 3                                                              | Ssc.26356.1.S1_at   | -1.23 q < 0.00126  | -1.03 q < 1       | -1.63 q < 0.00344 | -1.21 q < 0.444   | -1.3 q < 0.734    | -1.1 q < 1         |
| IDS       | iduronate 2-sulfatase                                                                 | Ssc.16646.1.S1_at   | -1.23 q < 0.000274 | -1.13 q < 1       | -1.4 q < 0.0473   | -1.14 q < 0.557   | -1.22 q < 1       | -1.27 q < 0.444    |
| RPL15     | ribosomal protein L15                                                                 | Ssc.12364.1.S1_at   | -1.19 q < 0.000279 | -1.05 q < 1       | -1.34 q < 0.0414  | -1.21 q < 0.262   | -1.1 q < 1        | -1.28 q < 0.153    |
| LPAR1     | lysophosphatidic acid receptor 1                                                      | Ssc.31062.1.S1_at   | -1.21 q < 0.000282 | -1.04 q < 1       | -1.23 q < 0.389   | -1.37 q < 0.0307  | -1.15 q < 1       | -1.27 q < 0.3      |
| TYMS      | thymidylate synthetase                                                                | Ssc.6934.2.A1_at    | -1.17 q < 0.000283 | -1.18 q < 0.491   | -1.11 q < 0.766   | -1.08 q < 0.662   | -1.16 q < 1       | -1.32 q < 0.0281   |
| TYMS      | thymidylate synthetase                                                                | Ssc.6934.3.S1_at    | 1.08 q < 0.219     | 1.38 q < 0.0149   | 1.05 q < 0.943    | 1.1 q < 0.607     | 1.04 q < 1        | -1.1 q < 1         |
| NUP210    | nucleoporin 210kDa                                                                    | Ssc.28954.1.S1_at   | 1.23 q < 0.000291  | 1.24 q < 0.523    | 1.14 q < 0.808    | 1.2 q < 0.379     | 1.13 q < 1        | 1.44 q < 0.024     |
| IGF2R     | insulin-like growth factor 2 receptor                                                 | Ssc.422.1.S1_at     | -1.29 q < 0.000294 | -1.03 q < 1       | -1.49 q < 0.0725  | -1.56 q < 0.0218  | -1.27 q < 1       | -1.16 q < 1        |
| IGF2R     | insulin-like growth factor 2 receptor                                                 | Ssc.15818.1.S1_at   | -1.24 q < 0.000529 | -1.07 q < 1       | -1.46 q < 0.0387  | -1.3 q < 0.212    | -1.11 q < 1       | -1.31 q < 0.37     |
| Q9NX95    | -                                                                                     | Ssc.4505.1.A1_at    | 1.26 q < 0.000294  | 1.02 q < 1        | -1.15 q < 0.827   | 1.4 q < 0.0747    | 1.77 q < 0.000259 | 1.42 q < 0.0983    |

| Gene Name | Gene Description                                                       | Probe Set ID        | Breed MS-WC        | Day 25 MS-WC          | Day 45 MS-WC          | Day 65 MS-WC         | Day 85 MS-WC     | Day 105 MS-WC     |
|-----------|------------------------------------------------------------------------|---------------------|--------------------|-----------------------|-----------------------|----------------------|------------------|-------------------|
| RBPJ      | recombination signal binding protein for immunoglobulin kappa J region | Ssc.29086.1.S1_at   | -1.21 q < 0.000298 | -1 q < 1              | -1.27 q < 0.241       | -1.18 q < 0.404      | -1.19 q < 1      | -1.46 q < 0.00861 |
| TIAM2     | T-cell lymphoma invasion and metastasis 2                              | Ssc.30458.1.A1_at   | 1.18 q < 0.000299  | 1.07 q < 1            | 1.37 q < 0.0115       | 1.2 q < 0.233        | 1.04 q < 1       | 1.24 q < 0.271    |
| DOCK11    | dedicator of cytokinesis 11                                            | Ssc.3303.1.S1_at    | -1.45 q < 0.000302 | -1.49 q < 0.515       | -1.9 q < 0.0344       | -1.22 q < 0.645      | -1.29 q < 1      | -1.44 q < 0.695   |
| NPNT      | nephronectin                                                           | Ssc.31071.1.A1_at   | 1.29 q < 0.000305  | 1.48 q < 0.104        | 1.11 q < 0.913        | 1.91 q < 0.000137    | 1.17 q < 1       | -1.01 q < 1       |
| NPNT      | nephronectin                                                           | Ssc.9527.1.S1_at    | 1.11 q < 0.22      | 1.2 q < 0.878         | -1.04 q < 0.973       | 1.49 q < 0.0175      | 1.06 q < 1       | -1.07 q < 1       |
| TRPV6     | transient receptor potential cation channel, subfamily V, member 6     | Ssc.2896.1.S1_at    | 1.66 q < 0.000313  | 1.55 q < 0.795        | 1.56 q < 0.594        | 2.57 q < 0.0116      | 1.2 q < 1        | 1.66 q < 0.666    |
| STEAP4    | STEAP family member 4                                                  | Ssc.9114.1.S1_at    | 1.44 q < 0.000314  | 1.08 q < 1            | 1.29 q < 0.764        | 2.29 q < 0.000992    | 1.43 q < 1       | 1.37 q < 0.903    |
| UHRF1BP1L | UHRF1 binding protein 1-like                                           | Ssc.7768.1.A1_at    | -1.29 q < 0.000316 | -1.6 q < 0.0228       | -1.35 q < 0.318       | -1.18 q < 0.562      | -1.16 q < 1      | -1.22 q < 1       |
| CTTNBP2   | cortactin binding protein 2                                            | Ssc.26418.1.A1_at   | 1.16 q < 0.000324  | 1.14 q < 0.787        | 1.13 q < 0.628        | 1.3 q < 0.0172       | 1.06 q < 1       | 1.17 q < 0.562    |
| LYCAT     | lysocardiolipin acyltransferase 1                                      | Ssc.7504.1.A1_at    | 1.37 q < 0.000328  | 1.03 q < 1            | 2.36 q < 0.0000357    | 1.19 q < 0.626       | 1.01 q < 1       | 1.66 q < 0.0727   |
| CGNL1     | cingulin-like 1                                                        | Ssc.1447.1.A1_at    | -1.24 q < 0.000346 | 1.06 q < 1            | -1.4 q < 0.0676       | -1.45 q < 0.0246     | -1.34 q < 0.348  | -1.13 q < 1       |
| CGNL1     | cingulin-like 1                                                        | Ssc.1447.3.S1_at    | -1.25 q < 0.000418 | -1.02 q < 1           | -1.39 q < 0.129       | -1.31 q < 0.199      | -1.33 q < 0.519  | -1.25 q < 0.713   |
| SMAD5     | SMAD family member 5                                                   | Ssc.7262.1.A1_at    | -1.26 q < 0.000359 | -1.34 q < 0.304       | -1.54 q < 0.017       | 1.03 q < 0.938       | -1.24 q < 1      | -1.27 q < 0.652   |
| SMAD5     | SMAD family member 5                                                   | Ssc.5634.1.A1_at    | 1.23 q < 0.000869  | 1.38 q < 0.336        | 1.18 q < 0.816        | 1.08 q < 0.822       | 1.14 q < 1       | 1.41 q < 0.275    |
| NP_922932 | -                                                                      | Ssc.30245.1.A1_s_at | -1.18 q < 0.000363 | -1.61 q < 0.00000531  | -1.02 q < 0.988       | -1.14 q < 0.455      | -1.08 q < 1      | -1.11 q < 1       |
| NP_922932 | -                                                                      | Ssc.22377.1.A1_at   | -1.13 q < 0.0371   | -1.5 q < 0.00171      | 1 q < 1               | -1.05 q < 0.844      | -1.1 q < 1       | -1.06 q < 1       |
| WDR42A    | DDb1 and CUL4 associated factor 8                                      | Ssc.19651.1.S1_at   | -1.19 q < 0.000363 | -1.05 q < 1           | -1.54 q < 0.000289    | -1.15 q < 0.468      | -1.19 q < 1      | -1.09 q < 1       |
| RWDD4A    | RWD domain containing 4A                                               | Ssc.2855.1.S1_at    | 1.2 q < 0.000364   | 1.1 q < 1             | 1.25 q < 0.31         | 1.37 q < 0.034       | 1.27 q < 0.463   | 1.07 q < 1        |
| MTHFR     | methylenetetrahydrofolate reductase (NAD(P)H)                          | Ssc.2260.1.A1_at    | 1.19 q < 0.000377  | 1.08 q < 1            | 1.01 q < 0.997        | 1.38 q < 0.0115      | 1.26 q < 0.331   | 1.23 q < 0.351    |
| FDPS      | farnesyl diphosphate synthase                                          | Ssc.12202.2.S1_at   | 1.31 q < 0.00038   | 1.45 q < 0.187        | 1.04 q < 0.979        | 1.7 q < 0.0067       | 1.26 q < 1       | 1.17 q < 1        |
| FAM32A    | family with sequence similarity 32, member A                           | Ssc.24189.1.S1_at   | 1.14 q < 0.000394  | 1.34 q < 0.0025       | 1.06 q < 0.908        | 1.1 q < 0.523        | 1.18 q < 0.561   | 1.06 q < 1        |
| THBS3     | thrombospondin 3                                                       | Ssc.11559.2.A1_at   | -1.31 q < 0.000418 | 1.2 q < 1             | -1.28 q < 0.556       | -1.36 q < 0.235      | -1.5 q < 0.193   | -1.75 q < 0.00489 |
| THBS3     | thrombospondin 3                                                       | Ssc.11559.1.A1_at   | -1.23 q < 0.0133   | 1.17 q < 1            | -1.28 q < 0.566       | -1.14 q < 0.679      | -1.32 q < 0.988  | -1.68 q < 0.0116  |
| DYNC1L12  | dynein, cytoplasmic 1, light intermediate chain 2                      | Ssc.25763.1.A1_at   | -1.18 q < 0.000428 | -1.16 q < 0.807       | -1.07 q < 0.916       | -1.17 q < 0.381      | -1.41 q < 0.0098 | -1.13 q < 1       |
| LYPLAL1   | lysophospholipase-like 1                                               | Ssc.19905.1.S1_at   | 1.19 q < 0.000436  | 1.16 q < 0.809        | 1.13 q < 0.749        | 1.38 q < 0.0161      | 1.17 q < 1       | 1.12 q < 1        |
| UGCG      | UDP-glucose ceramide glucosyltransferase                               | Ssc.13473.1.A1_at   | 1.15 q < 0.00044   | -1.06 q < 1           | 1.49 q < 0.0000163    | 1.13 q < 0.398       | 1.04 q < 1       | 1.2 q < 0.253     |
| TOM1L2    | target of myb1-like 2 (chicken)                                        | Ssc.5014.1.S1_at    | -1.19 q < 0.000443 | -1.18 q < 0.712       | -1.84 q < 0.000000482 | -1.14 q < 0.508      | -1.05 q < 1      | 1.07 q < 1        |
| TOM1L2    | target of myb1-like 2 (chicken)                                        | Ssc.11264.1.A1_at   | -1.13 q < 0.00973  | -1.19 q < 0.527       | -1.09 q < 0.864       | -1.03 q < 0.907      | -1.17 q < 1      | -1.21 q < 0.397   |
| MEP1B     | meprin A, beta                                                         | Ssc.12240.1.S1_at   | 1.54 q < 0.000459  | 1.16 q < 1            | 1.25 q < 0.877        | 2.43 q < 0.00514     | 1.66 q < 0.694   | 1.47 q < 0.869    |
| MEP1B     | meprin A, beta                                                         | Ssc.13230.1.S1_at   | 1.16 q < 0.0522    | -1.01 q < 1           | 1.07 q < 0.94         | 1.48 q < 0.0251      | 1.15 q < 1       | 1.15 q < 1        |
| CCDC99    | coiled-coil domain containing 99                                       | Ssc.25461.1.S1_at   | 1.19 q < 0.000462  | 1.04 q < 1            | 1.24 q < 0.239        | 1.77 q < 0.000000145 | -1 q < 1         | 1.03 q < 1        |
| CCDC99    | coiled-coil domain containing 99                                       | Ssc.22545.1.A1_at   | 1.05 q < 0.577     | 1.43 q < 0.000735     | 1.01 q < 0.996        | -1.01 q < 0.966      | -1.03 q < 1      | -1.08 q < 1       |
| SULT4A1   | sulfotransferase family 4A, member 1                                   | Ssc.1936.1.A1_at    | -1.23 q < 0.000462 | -1.02 q < 1           | -1.29 q < 0.276       | -1.22 q < 0.354      | -1.46 q < 0.0437 | -1.19 q < 0.934   |
| MYEOV2    | myeloma overexpressed 2                                                | Ssc.16493.1.S1_s_at | -1.14 q < 0.000467 | 1.1 q < 0.987         | -1.29 q < 0.0125      | -1.2 q < 0.126       | -1.15 q < 0.997  | -1.19 q < 0.242   |
| GNRHR2    | gonadotropin-releasing hormone (type 2) receptor 2                     | Ssc.26339.1.S1_a_at | 1.18 q < 0.000481  | 1.08 q < 1            | 1.15 q < 0.647        | 1.4 q < 0.00413      | 1.14 q < 1       | 1.13 q < 1        |
| PDCC6IP   | programmed cell death 6 interacting protein                            | Ssc.17478.1.A1_at   | -1.23 q < 0.000488 | -1.1 q < 1            | -1.28 q < 0.316       | -1.48 q < 0.0134     | -1.25 q < 0.917  | -1.08 q < 1       |
| TLE1      | transducin-like enhancer of split 1 (E(sp1) homolog, Drosophila)       | Ssc.18454.1.A1_at   | -1.17 q < 0.000498 | -1.35 q < 0.0146      | -1.14 q < 0.649       | -1.1 q < 0.606       | -1.22 q < 0.501  | -1.05 q < 1       |
| PNPO      | pyridoxamine 5'-phosphate oxidase                                      | Ssc.6484.1.S1_at    | 1.24 q < 0.000499  | 1.31 q < 0.373        | 1.28 q < 0.392        | 1.43 q < 0.0476      | 1.21 q < 1       | 1.03 q < 1        |
| O95333    | -                                                                      | Ssc.5784.1.S1_at    | -1.35 q < 0.000516 | -1.22 q < 1           | -1.8 q < 0.0125       | -1.43 q < 0.209      | -1.17 q < 1      | -1.22 q < 1       |
| SH3PXD2A  | SH3 and PX domains 2A                                                  | Ssc.16978.1.A1_at   | -1.25 q < 0.000527 | -1.51 q < 0.0244      | -1.17 q < 0.764       | -1.31 q < 0.19       | -1.17 q < 1      | -1.11 q < 1       |
| SH3PXD2A  | SH3 and PX domains 2A                                                  | Ssc.16978.2.S1_at   | -1.22 q < 0.00122  | -1.46 q < 0.0309      | -1.17 q < 0.726       | -1.24 q < 0.32       | -1.12 q < 1      | -1.13 q < 1       |
| IL21R     | interleukin 21 receptor                                                | Ssc.19416.1.A1_at   | -1.43 q < 0.000537 | -1.17 q < 1           | -2.17 q < 0.00393     | -1.33 q < 0.481      | -1.74 q < 0.186  | -1.02 q < 1       |
| FAP       | fibroblast activation protein, alpha                                   | Ssc.4543.1.S1_at    | -1.38 q < 0.000565 | -2.92 q < 0.000000164 | -1.3 q < 0.68         | -1.18 q < 0.67       | 1.03 q < 1       | -1.13 q < 1       |
| RPL3      | ribosomal protein L3                                                   | Ssc.11099.1.S1_at   | -1.13 q < 0.000565 | 1.01 q < 1            | -1.17 q < 0.234       | -1.09 q < 0.497      | -1.11 q < 1      | -1.29 q < 0.00401 |
| C4orf45   | chromosome 4 open reading frame 45                                     | Ssc.5870.3.S1_at    | 1.16 q < 0.00057   | 1.05 q < 1            | -1.05 q < 0.94        | 1.27 q < 0.0616      | 1.22 q < 0.474   | 1.37 q < 0.0067   |
| C14orf1   | chromosome 14 open reading frame 1                                     | Ssc.11458.1.S1_at   | 1.33 q < 0.000602  | 1.11 q < 1            | 1.21 q < 0.802        | 1.72 q < 0.0162      | 1.44 q < 0.575   | 1.27 q < 0.991    |

| Gene Name | Gene Description                                                                                                         | Probe Set ID        | Breed MS-WC        | Day 25 MS-WC        | Day 45 MS-WC      | Day 65 MS-WC      | Day 85 MS-WC     | Day 105 MS-WC     |
|-----------|--------------------------------------------------------------------------------------------------------------------------|---------------------|--------------------|---------------------|-------------------|-------------------|------------------|-------------------|
| GLE1      | GLE1 RNA export mediator homolog (yeast)                                                                                 | Ssc.1572.1.S1_at    | -1.14 q < 0.000667 | -1.04 q < 1         | -1.32 q < 0.0079  | -1.15 q < 0.334   | -1.12 q < 1      | -1.11 q < 1       |
| LRR8C8    | leucine rich repeat containing 8 family, member C                                                                        | Ssc.13736.1.A1_at   | -1.29 q < 0.000675 | -1.02 q < 1         | -1.4 q < 0.213    | -1.19 q < 0.554   | -1.64 q < 0.0233 | -1.26 q < 0.87    |
| RPS6KC1   | ribosomal protein S6 kinase, 52kDa, polypeptide 1                                                                        | Ssc.29354.1.A1_at   | -1.26 q < 0.000681 | -1.18 q < 1         | -1.64 q < 0.00558 | -1.04 q < 0.911   | -1.32 q < 0.696  | -1.2 q < 1        |
| TYBN      | -                                                                                                                        | Ssc.26266.1.S1_at   | -1.25 q < 0.00072  | -1.69 q < 0.00135   | -1.15 q < 0.828   | -1.11 q < 0.72    | -1.19 q < 1      | -1.18 q < 1       |
| UMPS      | uridine monophosphate synthetase                                                                                         | Ssc.1601.1.S1_at    | 1.17 q < 0.000724  | 1.12 q < 1          | 1.34 q < 0.0311   | 1.08 q < 0.715    | 1.24 q < 0.472   | 1.11 q < 1        |
| ADAMTS3   | ADAM metalloproteinase with thrombospondin type 1 motif, 3                                                               | Ssc.30575.1.A1_at   | 1.18 q < 0.000755  | 1.01 q < 1          | 1.16 q < 0.602    | 1.6 q < 0.0000295 | 1.12 q < 1       | 1.08 q < 1        |
| PRDX3     | peroxiredoxin 3                                                                                                          | Ssc.1490.1.S1_at    | -1.41 q < 0.000767 | 1.1 q < 1           | -1.52 q < 0.332   | -2.5 q < 0.000141 | -1.54 q < 0.626  | -1.05 q < 1       |
| GUSB      | glucuronidase, beta                                                                                                      | Ssc.18585.1.S1_at   | -1.31 q < 0.000772 | -1.76 q < 0.00959   | 1.01 q < 0.997    | -1.51 q < 0.089   | -1.32 q < 1      | -1.12 q < 1       |
| LRP1B     | low density lipoprotein receptor-related protein 1B                                                                      | Ssc.8009.1.A1_at    | -1.21 q < 0.00078  | 1.19 q < 0.827      | -1.31 q < 0.19    | -1.32 q < 0.121   | -1.23 q < 1      | -1.47 q < 0.013   |
| HLA-DRB1  | major histocompatibility complex, class II, DR beta 1                                                                    | Ssc.16213.1.A1_x_at | 1.25 q < 0.000792  | -1.07 q < 1         | 1.03 q < 0.982    | 3.08 q < 0        | -1.03 q < 1      | 1.08 q < 1        |
| OXCT1     | 3-oxoacid CoA transferase 1                                                                                              | Ssc.11096.1.S1_at   | 1.19 q < 0.000797  | 1.63 q < 0.0000531  | -1.05 q < 0.948   | 1.31 q < 0.0818   | 1.04 q < 1       | 1.12 q < 1        |
| OXCT1     | 3-oxoacid CoA transferase 1                                                                                              | Ssc.27309.1.S1_at   | 1.17 q < 0.0089    | 1.64 q < 0.000213   | -1.08 q < 0.911   | 1.31 q < 0.12     | 1.01 q < 1       | 1.08 q < 1        |
| OXCT1     | 3-oxoacid CoA transferase 1                                                                                              | Ssc.3086.1.S1_at    | 1.14 q < 0.0126    | 1.3 q < 0.137       | -1.06 q < 0.93    | 1.27 q < 0.126    | 1.08 q < 1       | 1.17 q < 0.848    |
| KPNA5     | karyopherin alpha 5 (importin alpha 6)                                                                                   | Ssc.15827.1.S1_at   | 1.15 q < 0.000798  | 1.07 q < 1          | 1.22 q < 0.171    | 1.32 q < 0.00768  | 1.05 q < 1       | 1.09 q < 1        |
| ACAD8     | acyl-CoA dehydrogenase family, member 8                                                                                  | Ssc.21283.1.S1_at   | -1.66 q < 0.000802 | -1.2 q < 1          | -2.66 q < 0.0203  | -1.97 q < 0.159   | -1.49 q < 1      | -1.35 q < 1       |
| ACAD8     | acyl-CoA dehydrogenase family, member 8                                                                                  | Ssc.21283.2.S1_at   | -1.25 q < 0.0146   | -1.14 q < 1         | -1.51 q < 0.161   | -1.27 q < 0.451   | -1.11 q < 1      | -1.25 q < 1       |
| PLEC1     | plectin                                                                                                                  | Ssc.28415.1.S1_at   | -1.25 q < 0.000811 | 1.03 q < 1          | -1.48 q < 0.0473  | -1.21 q < 0.451   | -1.36 q < 0.42   | -1.28 q < 0.596   |
| PTOV1     | prostate tumor overexpressed 1                                                                                           | Ssc.18853.2.S1_a_at | 1.21 q < 0.000821  | 1.3 q < 0.249       | 1.04 q < 0.958    | 1.53 q < 0.00287  | 1.04 q < 1       | 1.2 q < 0.855     |
| Q8WTR8    | -                                                                                                                        | Ssc.29810.1.A1_at   | -1.14 q < 0.000824 | 1.01 q < 1          | -1.36 q < 0.00136 | -1.15 q < 0.288   | -1.2 q < 0.396   | -1.03 q < 1       |
| RASSF2    | Ras association (RalGDS/AF-6) domain family member 2                                                                     | Ssc.11787.2.A1_at   | -1.26 q < 0.000835 | -1.98 q < 0.0000139 | -1.15 q < 0.844   | -1.15 q < 0.606   | -1.06 q < 1      | -1.13 q < 1       |
| RASSF2    | Ras association (RalGDS/AF-6) domain family member 2                                                                     | Ssc.11787.1.S1_at   | -1.12 q < 0.00554  | -1.47 q < 0.00446   | -1.08 q < 0.899   | -1 q < 0.988      | -1.05 q < 1      | -1.06 q < 1       |
| OGT       | O-linked N-acetylglucosamine (GlcNAc) transferase (UDP-N-acetylglucosamine:polypeptide-N-acetylglucosaminyl transferase) | Ssc.8000.1.A1_at    | -1.18 q < 0.000847 | -1.08 q < 1         | -1.36 q < 0.0343  | -1.15 q < 0.475   | -1.23 q < 0.688  | -1.12 q < 1       |
| OGT       | O-linked N-acetylglucosamine (GlcNAc) transferase (UDP-N-acetylglucosamine:polypeptide-N-acetylglucosaminyl transferase) | Ssc.27417.1.S1_at   | 1.12 q < 0.108     | 1.21 q < 0.676      | 1.02 q < 0.99     | 1.39 q < 0.0354   | -1.09 q < 1      | 1.12 q < 1        |
| PLS3      | plastin 3                                                                                                                | Ssc.12172.1.A1_at   | -1.15 q < 0.000847 | -1.18 q < 0.453     | -1.06 q < 0.907   | -1.01 q < 0.957   | -1.2 q < 0.519   | -1.31 q < 0.02    |
| TTYH2     | tweety homolog 2 (Drosophila)                                                                                            | Ssc.2531.1.S1_at    | 1.22 q < 0.000863  | 1.01 q < 1          | 1.13 q < 0.844    | 1.51 q < 0.00813  | 1.21 q < 1       | 1.31 q < 0.317    |
| HPS5      | Hermansky-Pudlak syndrome 5                                                                                              | Ssc.24670.1.S1_at   | -1.19 q < 0.000879 | -1.16 q < 0.887     | -1.5 q < 0.00252  | -1.08 q < 0.746   | -1.12 q < 1      | -1.14 q < 1       |
| HPS5      | Hermansky-Pudlak syndrome 5                                                                                              | Ssc.24670.2.S1_at   | -1.2 q < 0.00266   | -1.21 q < 0.795     | -1.51 q < 0.0108  | 1.01 q < 0.983    | -1.14 q < 1      | -1.23 q < 0.73    |
| MEG3      | maternally expressed 3 (non-protein coding)                                                                              | Ssc.6192.1.A1_at    | -1.61 q < 0.00088  | -2.5 q < 0.0274     | -1.39 q < 0.802   | -1.12 q < 0.865   | -1.43 q < 1      | -1.96 q < 0.245   |
| MEG3      | maternally expressed 3 (non-protein coding)                                                                              | Ssc.5159.2.S1_at    | -1.43 q < 0.00233  | -2.12 q < 0.0212    | -1.29 q < 0.819   | 1.01 q < 0.983    | -1.34 q < 1      | -1.66 q < 0.325   |
| DGCR8     | DiGeorge syndrome critical region gene 8                                                                                 | Ssc.28251.1.A1_at   | 1.18 q < 0.000915  | 1.17 q < 0.822      | 1.06 q < 0.93     | 1.37 q < 0.0234   | 1.15 q < 1       | 1.19 q < 0.731    |
| HMGR      | 3-hydroxy-3-methylglutaryl-CoA reductase                                                                                 | Ssc.16088.1.S1_at   | 1.38 q < 0.000923  | 1.71 q < 0.104      | -1.07 q < 0.96    | 1.76 q < 0.0415   | 1.47 q < 0.777   | 1.24 q < 1        |
| FUS       | fused in sarcoma                                                                                                         | Ssc.11135.1.A1_at   | -1.16 q < 0.000946 | 1.1 q < 1           | -1.21 q < 0.31    | -1.19 q < 0.271   | -1.17 q < 1      | -1.39 q < 0.00512 |
| Q8N4P4    | -                                                                                                                        | Ssc.1600.1.A1_a_at  | 1.25 q < 0.000969  | 1.07 q < 1          | 1.19 q < 0.724    | 1.64 q < 0.00311  | 1.17 q < 1       | 1.23 q < 0.862    |
| Q8N4P4    | -                                                                                                                        | Ssc.1600.3.S1_at    | 1.32 q < 0.000983  | 1.2 q < 1           | 1.21 q < 0.792    | 1.88 q < 0.00266  | 1.44 q < 0.554   | 1.01 q < 1        |
| Q8N4P4    | -                                                                                                                        | Ssc.1600.1.A1_at    | 1.24 q < 0.00443   | -1.01 q < 1         | 1.16 q < 0.843    | 1.68 q < 0.00432  | 1.26 q < 1       | 1.2 q < 1         |
| TRAPPC9   | trafficking protein particle complex 9                                                                                   | Ssc.7549.1.A1_at    | 1.16 q < 0.000987  | -1.03 q < 1         | 1.15 q < 0.597    | 1.33 q < 0.0151   | 1.15 q < 1       | 1.22 q < 0.297    |
| CYP4B1    | cytochrome P450, family 4, subfamily B, polypeptide 1                                                                    | Ssc.19211.1.S1_at   | 1.48 q < 0.001     | 1.1 q < 1           | 1.87 q < 0.107    | -1.15 q < 0.786   | 1.93 q < 0.145   | 2.08 q < 0.0353   |
| ABCA5     | ATP-binding cassette, sub-family A (ABC1), member 5                                                                      | Ssc.30026.1.A1_at   | 1.17 q < 0.00102   | 1.09 q < 1          | 1.06 q < 0.933    | 1.48 q < 0.000904 | 1.18 q < 1       | 1.11 q < 1        |
| DNAH9     | dynein, axonemal, heavy chain 9                                                                                          | Ssc.22302.1.A1_at   | 1.18 q < 0.00103   | -1 q < 1            | 1.14 q < 0.707    | 1.21 q < 0.267    | 1.17 q < 1       | 1.4 q < 0.0128    |
| EBP       | emopamil binding protein (sterol isomerase)                                                                              | Ssc.5045.1.S1_at    | 1.32 q < 0.00103   | 1.87 q < 0.0042     | -1.14 q < 0.898   | 1.39 q < 0.25     | 1.32 q < 1       | 1.34 q < 0.706    |
| EBP       | SH3 domain containing 19                                                                                                 | Ssc.5045.1.S1_at    | 1.32 q < 0.00103   | 1.87 q < 0.0042     | -1.14 q < 0.898   | 1.39 q < 0.25     | 1.32 q < 1       | 1.34 q < 0.706    |
| EBP       | galactosidase, beta 1                                                                                                    | Ssc.5045.1.S1_at    | 1.32 q < 0.00103   | 1.87 q < 0.0042     | -1.14 q < 0.898   | 1.39 q < 0.25     | 1.32 q < 1       | 1.34 q < 0.706    |
| PHCA      | alkaline ceramidase 3                                                                                                    | Ssc.10292.1.S1_at   | 1.24 q < 0.00104   | -1.12 q < 1         | 1.11 q < 0.9      | 1.73 q < 0.000495 | 1.26 q < 1       | 1.36 q < 0.231    |
| PDGFD     | platelet derived growth factor D                                                                                         | Ssc.10303.1.A1_at   | -1.39 q < 0.00104  | -2.16 q < 0.00216   | -1.61 q < 0.168   | -1.32 q < 0.466   | -1.08 q < 1      | -1.03 q < 1       |



| Gene Name | Gene Description                                        | Probe Set ID        | Breed MS-WC       | Day 25 MS-WC      | Day 45 MS-WC      | Day 65 MS-WC          | Day 85 MS-WC        | Day 105 MS-WC        |
|-----------|---------------------------------------------------------|---------------------|-------------------|-------------------|-------------------|-----------------------|---------------------|----------------------|
| PAPOLA    | poly(A) polymerase alpha                                | Ssc.21300.1.S1_at   | -1.21 q < 0.00106 | 1.15 q < 1        | -1.44 q < 0.0223  | -1.34 q < 0.0922      | -1.2 q < 1          | -1.27 q < 0.404      |
| PHYH      | phytanoyl-CoA 2-hydroxylase                             | Ssc.8139.1.S1_at    | -1.26 q < 0.00107 | 1.01 q < 1        | -1.52 q < 0.0407  | -1.3 q < 0.288        | -1.26 q < 1         | -1.28 q < 0.673      |
| C1QA      | complement component 1, q subcomponent, A chain         | Ssc.833.1.S1_at     | -1.64 q < 0.00108 | -1.04 q < 1       | -1.27 q < 0.898   | -1.3 q < 0.673        | -1.17 q < 1         | -5.92 q < 0.00000502 |
| GABARAPL1 | GABA(A) receptor-associated protein like 1              | Ssc.22588.1.S1_at   | -1.19 q < 0.00112 | -1.05 q < 1       | -1.32 q < 0.106   | -1.42 q < 0.0117      | -1.25 q < 0.585     | 1.04 q < 1           |
| GABARAPL1 | GABA(A) receptor-associated protein like 1              | Ssc.22588.2.S1_at   | -1.13 q < 0.0345  | -1.04 q < 1       | -1.16 q < 0.642   | -1.21 q < 0.269       | -1.14 q < 1         | -1.1 q < 1           |
| CYBA      | cytochrome b-245, alpha polypeptide                     | Ssc.16296.1.S1_at   | -1.26 q < 0.00113 | -1.23 q < 0.857   | -1.22 q < 0.673   | -1.19 q < 0.537       | -1.09 q < 1         | -1.63 q < 0.00944    |
| RPL4      | ribosomal protein L4                                    | Ssc.12277.1.S1_at   | -1.16 q < 0.00117 | -1.09 q < 1       | -1.22 q < 0.259   | -1.06 q < 0.761       | -1.14 q < 1         | -1.31 q < 0.0478     |
| PTHLH     | parathyroid hormone-like hormone                        | Ssc.9991.1.S1_at    | 1.19 q < 0.00127  | 1.07 q < 1        | 1.32 q < 0.102    | 1.51 q < 0.00148      | 1.04 q < 1          | 1.06 q < 1           |
| GAPDH     | glyceraldehyde-3-phosphate dehydrogenase                | AFX-Ssc.gapdh-3_at  | 1.17 q < 0.00129  | 1.24 q < 0.302    | 1.06 q < 0.934    | 1.43 q < 0.00346      | 1.16 q < 1          | 1.01 q < 1           |
| GAPDH     | glyceraldehyde-3-phosphate dehydrogenase                | Ssc.14942.1.S1_at   | 1.13 q < 0.0221   | 1.2 q < 0.522     | 1.02 q < 0.989    | 1.35 q < 0.0197       | 1.12 q < 1          | -1.01 q < 1          |
| ATMIN     | ATM interactor                                          | Ssc.6346.1.S1_at    | 1.24 q < 0.00133  | 1.18 q < 1        | 1.08 q < 0.93     | 1.54 q < 0.0153       | 1.29 q < 0.823      | 1.16 q < 1           |
| AKAP2     | A kinase (PRKA) anchor protein 2                        | Ssc.1407.3.S1_at    | -1.27 q < 0.00134 | -1.01 q < 1       | -1.62 q < 0.0184  | -1.27 q < 0.386       | -1.39 q < 0.519     | -1.15 q < 1          |
| AKAP2     | A kinase (PRKA) anchor protein 2                        | Ssc.1407.2.S1_at    | -1.24 q < 0.0179  | -1.05 q < 1       | -1.63 q < 0.0424  | -1.21 q < 0.549       | -1.34 q < 1         | -1.05 q < 1          |
| CCR5      | chemokine (C-C motif) receptor 5                        | Ssc.26328.1.S1_at   | -1.18 q < 0.00138 | -1.08 q < 1       | -1.13 q < 0.8     | -1.1 q < 0.655        | -1.12 q < 1         | -1.53 q < 0.000838   |
| SYNJ2     | synaptotagmin 2                                         | Ssc.14132.1.A1_at   | -1.16 q < 0.00142 | -1.08 q < 1       | -1.35 q < 0.0232  | -1.05 q < 0.801       | -1.1 q < 1          | -1.26 q < 0.194      |
| PDHA2     | pyruvate dehydrogenase (lipoamide) alpha 2              | Ssc.25479.1.S1_at   | 1.12 q < 0.00144  | -1 q < 1          | 1.07 q < 0.865    | 1.28 q < 0.00923      | 1.13 q < 1          | 1.17 q < 0.377       |
| CLIC4     | chloride intracellular channel 4                        | Ssc.14592.2.A1_at   | 1.42 q < 0.00157  | 1.88 q < 0.0698   | -1.13 q < 0.937   | 2.34 q < 0.00187      | 1.29 q < 1          | 1.15 q < 1           |
| CLIC4     | chloride intracellular channel 4                        | Ssc.26192.1.S1_at   | 1.13 q < 0.0622   | 1.08 q < 1        | -1.07 q < 0.921   | 1.51 q < 0.00202      | -1.02 q < 1         | 1.22 q < 0.6         |
| CDR2      | cerebellar degeneration-related protein 2, 62kDa        | Ssc.3394.3.A1_at    | 1.23 q < 0.00159  | 1.08 q < 1        | 1.33 q < 0.239    | 1.14 q < 0.609        | 1.13 q < 1          | 1.51 q < 0.025       |
| DNAJC1    | DnaJ (Hsp40) homolog, subfamily C, member 1             | Ssc.27322.1.S1_at   | 1.22 q < 0.00162  | -1.15 q < 1       | 1.16 q < 0.776    | 1.54 q < 0.00682      | 1.33 q < 0.423      | 1.3 q < 0.391        |
| GKP3      | glycerol kinase 3 pseudogene                            | Ssc.22221.1.S1_a_at | 1.25 q < 0.00169  | 1.31 q < 0.491    | -1 q < 1          | 1.83 q < 0.000203     | 1.08 q < 1          | 1.17 q < 1           |
| LOX       | lysyl oxidase                                           | Ssc.8224.1.S1_at    | -1.46 q < 0.00173 | -1.52 q < 0.62    | -1.37 q < 0.726   | -1.2 q < 0.714        | -1.25 q < 1         | -2.11 q < 0.0287     |
| LOX       | lysyl oxidase                                           | Ssc.10386.1.S1_at   | -1.38 q < 0.0123  | -2.07 q < 0.0463  | -1.27 q < 0.845   | -1.1 q < 0.859        | -1.21 q < 1         | -1.43 q < 0.926      |
| LIMD1     | LIM domains containing 1                                | Ssc.30639.1.S1_at   | -1.24 q < 0.00173 | -1.04 q < 1       | -1.65 q < 0.00407 | -1.3 q < 0.256        | -1.14 q < 1         | -1.15 q < 1          |
| TCEA2     | transcription elongation factor A (SII), 2              | Ssc.15645.1.S1_at   | -1.2 q < 0.00174  | -1.25 q < 0.469   | -1.48 q < 0.0111  | -1.24 q < 0.261       | -1.03 q < 1         | -1.05 q < 1          |
| CYP26B1   | cytochrome P450, family 26, subfamily B, polypeptide 1  | Ssc.22436.1.S1_at   | 1.58 q < 0.00175  | 1.24 q < 1        | 2.12 q < 0.107    | 2.24 q < 0.0485       | 1.21 q < 1          | 1.37 q < 1           |
| ABCC1     | ATP-binding cassette, sub-family C (CFTR/MRP), member 1 | Ssc.19612.1.S1_at   | 1.18 q < 0.00188  | 1.03 q < 1        | 1.13 q < 0.792    | 1.08 q < 0.736        | 1.14 q < 1          | 1.63 q < 0.000105    |
| ABCC1     | ATP-binding cassette, sub-family C (CFTR/MRP), member 1 | Ssc.14287.1.S1_at   | 1.12 q < 0.0652   | -1.11 q < 1       | 1.08 q < 0.908    | 1.16 q < 0.444        | 1.08 q < 1          | 1.45 q < 0.00807     |
| HSD17B14  | hydroxysteroid (17-beta) dehydrogenase 14               | Ssc.19146.1.S1_at   | 1.26 q < 0.00192  | 1.34 q < 0.453    | -1.24 q < 0.628   | 1.54 q < 0.0335       | 1.28 q < 1          | 1.49 q < 0.0958      |
| GPC5      | glypican 5                                              | Ssc.20047.1.S1_at   | 1.17 q < 0.00192  | 1.51 q < 0.00124  | 1.09 q < 0.894    | 1.17 q < 0.401        | 1.02 q < 1          | 1.14 q < 1           |
| GPC5      | glypican 5                                              | Ssc.9154.1.A1_at    | -1.16 q < 0.00333 | -1.08 q < 1       | -1.2 q < 0.448    | -1.29 q < 0.0946      | -1.2 q < 0.913      | -1.06 q < 1          |
| GSTA4     | glutathione S-transferase alpha 4                       | Ssc.5008.1.A1_at    | -1.24 q < 0.00195 | -1.08 q < 1       | -1.28 q < 0.464   | -1.29 q < 0.288       | -1.06 q < 1         | -1.57 q < 0.0207     |
| COL3A1    | collagen, type III, alpha 1                             | Ssc.11302.1.S1_at   | -1.38 q < 0.00197 | -1.02 q < 1       | -1.44 q < 0.462   | -1.08 q < 0.879       | -1.19 q < 1         | -2.65 q < 0.0000303  |
| COL3A1    | collagen, type III, alpha 1                             | Ssc.11302.1.S2_at   | -1.46 q < 0.00512 | -1.04 q < 1       | -1.48 q < 0.622   | -1.25 q < 0.682       | -1.13 q < 1         | -3.02 q < 0.000334   |
| WARS      | tryptophanyl-tRNA synthetase                            | Ssc.6139.1.S1_at    | -1.18 q < 0.00203 | -1.12 q < 1       | -1.28 q < 0.181   | 1.01 q < 0.972        | -1.16 q < 1         | -1.38 q < 0.0335     |
| GEMIN7    | gem (nuclear organelle) associated protein 7            | Ssc.15453.3.S1_a_at | -1.16 q < 0.00204 | -1.12 q < 0.996   | -1.32 q < 0.0387  | -1.07 q < 0.718       | -1.07 q < 1         | -1.21 q < 0.42       |
| C3orf59   | chromosome 3 open reading frame 59                      | Ssc.8346.1.A1_at    | 1.27 q < 0.00206  | -1.01 q < 1       | 1.07 q < 0.953    | 1.77 q < 0.00269      | 1.26 q < 1          | 1.4 q < 0.316        |
| UBA6      | ubiquitin-like modifier activating enzyme 6             | Ssc.13681.1.S1_at   | 1.16 q < 0.00206  | 1.11 q < 1        | 1.05 q < 0.943    | 1.59 q < 0.0000927    | 1.03 q < 1          | 1.08 q < 1           |
| ELMO2     | engulfment and cell motility 2                          | Ssc.2298.1.S1_at    | -1.16 q < 0.00211 | -1.09 q < 1       | -1.16 q < 0.583   | 1.02 q < 0.948        | -1.22 q < 0.63      | -1.39 q < 0.011      |
| TTC29     | tetratricopeptide repeat domain 29                      | Ssc.28065.1.A1_at   | -1.14 q < 0.00213 | -1.02 q < 1       | -1.03 q < 0.958   | -1.22 q < 0.107       | -1.47 q < 0.0000812 | -1.01 q < 1          |
| RASSF1    | Ras association (RalGDS/AF-6) domain family member 1    | Ssc.2077.1.S1_at    | 1.16 q < 0.00222  | 1.32 q < 0.0589   | -1.14 q < 0.691   | 1.84 q < 0.0000000491 | 1.1 q < 1           | -1.11 q < 1          |
| ZBP1      | Z-DNA binding protein 1                                 | Ssc.26005.1.S1_at   | 1.15 q < 0.00224  | 1.07 q < 1        | 1.19 q < 0.384    | 1.3 q < 0.041         | 1.28 q < 0.158      | -1.04 q < 1          |
| PTGFRN    | prostaglandin F2 receptor negative regulator            | Ssc.11942.1.S1_at   | -1.18 q < 0.00225 | -1.52 q < 0.00175 | -1.04 q < 0.958   | 1.04 q < 0.874        | -1.18 q < 1         | -1.28 q < 0.247      |
| PTGFRN    | prostaglandin F2 receptor negative regulator            | Ssc.12024.1.A1_at   | -1.14 q < 0.0103  | -1.37 q < 0.0144  | -1.07 q < 0.902   | 1.01 q < 0.979        | -1.12 q < 1         | -1.16 q < 0.835      |
| PTGFRN    | prostaglandin F2 receptor negative regulator            | Ssc.12992.1.S1_at   | -1.23 q < 0.02    | -1.32 q < 0.684   | -1.07 q < 0.955   | -1.1 q < 0.8          | -1.29 q < 1         | -1.43 q < 0.338      |
| Q96I09    | -                                                       | Ssc.6206.1.S1_at    | -1.23 q < 0.00226 | -1.1 q < 1        | -1.22 q < 0.617   | -1.47 q < 0.0325      | -1.13 q < 1         | -1.23 q < 0.849      |
| Q5TF57    | -                                                       | Ssc.21179.1.S1_at   | 1.39 q < 0.00227  | 1.04 q < 1        | 1.46 q < 0.457    | 1.93 q < 0.0215       | 1.18 q < 1          | 1.5 q < 0.539        |

| Gene Name | Gene Description                                                               | Probe Set ID        | Breed MS-WC        | Day 25 MS-WC       | Day 45 MS-WC       | Day 65 MS-WC       | Day 85 MS-WC       | Day 105 MS-WC       |
|-----------|--------------------------------------------------------------------------------|---------------------|--------------------|--------------------|--------------------|--------------------|--------------------|---------------------|
| KIAA2022  | KIAA2022                                                                       | Ssc.15351.1.A1_at   | -1.2 q < 0.00228   | 1.04 q < 1         | -1.31 q < 0.216    | -1.47 q < 0.0147   | -1.3 q < 0.516     | -1.05 q < 1         |
| CRYM      | crystallin, mu                                                                 | Ssc.30236.1.A1_at   | 1.27 q < 0.00229   | 1.3 q < 0.658      | -1.02 q < 0.992    | -1.03 q < 0.931    | 1.56 q < 0.0898    | 1.7 q < 0.00958     |
| SLC6A6    | solute carrier family 6 (neurotransmitter transporter, taurine), member 6      | Ssc.6154.1.S1_at    | -1.15 q < 0.00236  | 1.02 q < 1         | -1.25 q < 0.147    | -1.33 q < 0.0178   | -1.07 q < 1        | -1.15 q < 0.852     |
| FAM49A    | family with sequence similarity 49, member A                                   | Ssc.8340.1.A1_at    | -1.2 q < 0.00245   | -1.13 q < 1        | -1.46 q < 0.0232   | -1.24 q < 0.3      | -1.08 q < 1        | -1.13 q < 1         |
| GLRX5     | glutaredoxin 5                                                                 | Ssc.11338.1.S1_a_at | -1.33 q < 0.0025   | -1.01 q < 1        | -1.75 q < 0.0373   | -1.48 q < 0.197    | -1.56 q < 0.348    | -1.03 q < 1         |
| GLRX5     | glutaredoxin 5                                                                 | Ssc.6703.1.S1_at    | -1.16 q < 0.000879 | 1.05 q < 1         | -1.23 q < 0.241    | -1.13 q < 0.491    | -1.27 q < 0.199    | -1.27 q < 0.124     |
| IDH2      | isocitrate dehydrogenase 2 (NADP+), mitochondrial                              | Ssc.2449.1.S1_at    | -1.23 q < 0.0025   | 1.18 q < 1         | -1.18 q < 0.763    | -1.3 q < 0.246     | -1.44 q < 0.155    | -1.5 q < 0.0351     |
| PDE4D     | phosphodiesterase 4D, cAMP-specific                                            | Ssc.29848.1.A1_at   | 1.27 q < 0.0025    | 1.07 q < 1         | 1.06 q < 0.959     | 1.67 q < 0.0115    | 1.31 q < 1         | 1.33 q < 0.627      |
| RPL31     | ribosomal protein L31                                                          | Ssc.3747.1.A1_x_at  | -1.15 q < 0.0025   | 1.04 q < 1         | -1.2 q < 0.354     | -1.08 q < 0.705    | -1.12 q < 1        | -1.45 q < 0.00081   |
| RPL31     | ribosomal protein L31                                                          | Ssc.3747.1.A1_at    | -1.13 q < 0.0189   | 1.05 q < 1         | -1.18 q < 0.521    | -1.05 q < 0.84     | -1.1 q < 1         | -1.45 q < 0.00253   |
| RPL31     | ribosomal protein L31                                                          | Ssc.30785.1.S1_at   | 1.14 q < 0.0159    | 1.11 q < 1         | 1.05 q < 0.94      | 1.23 q < 0.209     | 1.08 q < 1         | 1.24 q < 0.321      |
| SLC5A1    | solute carrier family 5 (sodium/glucose cotransporter), member 1               | Ssc.22229.1.A1_at   | -1.15 q < 0.0025   | -1.46 q < 0.000441 | -1.11 q < 0.796    | -1.1 q < 0.587     | -1.09 q < 1        | -1.02 q < 1         |
| DAB2      | disabled homolog 2, mitogen-responsive phosphoprotein (Drosophila)             | Ssc.9118.1.S1_at    | -1.37 q < 0.00251  | -1.38 q < 0.769    | -1.17 q < 0.899    | -2.28 q < 0.000784 | -1.19 q < 1        | -1.09 q < 1         |
| DAB2      | disabled homolog 2, mitogen-responsive phosphoprotein (Drosophila)             | Ssc.2807.1.A1_at    | -1.36 q < 0.0339   | -1.26 q < 1        | -1.22 q < 0.899    | -2.22 q < 0.0212   | -1.21 q < 1        | -1.13 q < 1         |
| IL17RD    | interleukin 17 receptor D                                                      | Ssc.30983.1.A1_at   | -1.16 q < 0.00251  | -1.03 q < 1        | -1.18 q < 0.517    | 1.03 q < 0.885     | -1.52 q < 0.000487 | -1.18 q < 0.714     |
| SGCG      | sarcoglycan, gamma (35kDa dystrophin-associated glycoprotein)                  | Ssc.21763.1.A1_at   | -1.13 q < 0.00251  | -1.11 q < 0.987    | -1.31 q < 0.0125   | 1.03 q < 0.868     | -1.12 q < 1        | -1.17 q < 0.48      |
| ELOVL1    | elongation of very long chain fatty acids (FEN1/Elo2, SUR4/Elo3, yeast)-like 1 | Ssc.5650.1.S1_at    | 1.26 q < 0.00253   | 1.04 q < 1         | 1.12 q < 0.903     | 1.53 q < 0.0481    | 1.31 q < 1         | 1.37 q < 0.406      |
| BECN1     | beclin 1, autophagy related                                                    | Ssc.4845.1.S1_at    | 1.18 q < 0.00255   | 1.22 q < 0.574     | 1.01 q < 0.997     | 1.52 q < 0.00191   | 1.05 q < 1         | 1.19 q < 0.86       |
| ZNF277    | zinc finger protein 277                                                        | Ssc.1012.1.S1_at    | -1.21 q < 0.00262  | -1.04 q < 1        | -1.46 q < 0.036    | -1.08 q < 0.773    | -1.23 q < 1        | -1.29 q < 0.442     |
| ABHD6     | abhydrolase domain containing 6                                                | Ssc.6276.1.S1_at    | -1.23 q < 0.00264  | 1.06 q < 1         | -1.27 q < 0.48     | -1.19 q < 0.521    | -1.33 q < 0.611    | -1.5 q < 0.0496     |
| ADI1      | acireductone dioxygenase 1                                                     | Ssc.14003.4.S1_at   | -1.27 q < 0.00273  | 1.02 q < 1         | -1.94 q < 0.000367 | -1.08 q < 0.834    | -1.28 q < 1        | -1.24 q < 1         |
| ABCB11    | ATP-binding cassette, sub-family B (MDR/TAP), member 11                        | Ssc.16256.1.S1_at   | 1.33 q < 0.00275   | 1.06 q < 1         | 1.29 q < 0.695     | 1.93 q < 0.00595   | 1.24 q < 1         | 1.28 q < 1          |
| MAGED2    | melanoma antigen family D, 2                                                   | Ssc.11376.1.A1_a_at | -1.18 q < 0.00277  | 1.01 q < 1         | -1.4 q < 0.0347    | -1.29 q < 0.132    | -1.12 q < 1        | -1.16 q < 1         |
| TFAP2B    | transcription factor AP-2 beta (activating enhancer binding protein 2 beta)    | Ssc.17350.1.A1_at   | 1.13 q < 0.00285   | -1.04 q < 1        | 1.08 q < 0.842     | 1.35 q < 0.00165   | 1.12 q < 1         | 1.16 q < 0.601      |
| EFNB2     | ephrin-B2                                                                      | Ssc.27799.1.S1_at   | -1.18 q < 0.0029   | -1.11 q < 1        | -1.5 q < 0.00342   | -1.05 q < 0.855    | -1.15 q < 1        | -1.13 q < 1         |
| CAMK1G    | calcium/calmodulin-dependent protein kinase IG                                 | Ssc.27351.1.S1_at   | 1.16 q < 0.00305   | 1.17 q < 0.733     | 1.15 q < 0.664     | 1.31 q < 0.045     | 1.07 q < 1         | 1.11 q < 1          |
| DHDH      | dihydrodiol dehydrogenase (dimeric)                                            | Ssc.16041.1.S1_at   | -1.17 q < 0.00312  | 1.03 q < 1         | -1.47 q < 0.00307  | -1.2 q < 0.31      | -1.18 q < 1        | -1.07 q < 1         |
| WFDC1     | WAP four-disulfide core domain 1                                               | Ssc.9108.1.S1_at    | 1.22 q < 0.00312   | 1.16 q < 1         | 1.2 q < 0.69       | 1.58 q < 0.00594   | 1.04 q < 1         | 1.17 q < 1          |
| COL1A2    | collagen, type I, alpha 2                                                      | Ssc.21011.1.S1_at   | -1.47 q < 0.00317  | -1.05 q < 1        | -1.74 q < 0.254    | -1.24 q < 0.682    | -1.2 q < 1         | -2.5 q < 0.00564    |
| COL1A2    | collagen, type I, alpha 2                                                      | Ssc.24975.1.S1_at   | -1.47 q < 0.00579  | -1.21 q < 1        | -1.79 q < 0.26     | -1.28 q < 0.65     | -1.06 q < 1        | -2.34 q < 0.0257    |
| POLR3A    | polymerase (RNA) III (DNA directed) polypeptide A, 155kDa                      | Ssc.9561.1.A1_at    | -1.28 q < 0.00317  | -1.18 q < 1        | -1.19 q < 0.829    | -1.14 q < 0.703    | 1.01 q < 1         | -2.14 q < 0.0000386 |
| PIH1D1    | PIH1 domain containing 1                                                       | Ssc.12478.1.S1_at   | -1.14 q < 0.00319  | 1.04 q < 1         | -1.29 q < 0.0331   | -1.21 q < 0.147    | -1.08 q < 1        | -1.15 q < 0.731     |
| CYB5R3    | cytochrome b5 reductase 3                                                      | Ssc.16727.1.A1_at   | -1.2 q < 0.00321   | 1.23 q < 0.671     | -1.59 q < 0.00248  | -1.21 q < 0.38     | -1.32 q < 0.416    | -1.2 q < 0.912      |
| GLT8D1    | glycosyltransferase 8 domain containing 1                                      | Ssc.11574.1.A1_at   | -1.2 q < 0.00328   | -1.58 q < 0.00284  | -1.23 q < 0.514    | -1.04 q < 0.887    | -1.03 q < 1        | -1.2 q < 0.92       |
| CF365427  | -                                                                              | Ssc.22094.1.A1_at   | -1.15 q < 0.00329  | -1.12 q < 1        | -1.06 q < 0.918    | -1.23 q < 0.158    | -1.37 q < 0.0233   | -1.02 q < 1         |
| TNFRSF21  | tumor necrosis factor receptor superfamily, member 21                          | Ssc.1509.1.S1_at    | -1.26 q < 0.00329  | -1.64 q < 0.0184   | -1.27 q < 0.572    | -1.21 q < 0.525    | -1.07 q < 1        | -1.16 q < 1         |
| BRD3      | bromodomain containing 3                                                       | Ssc.4207.1.S1_at    | -1.19 q < 0.00336  | -1.06 q < 1        | -1.45 q < 0.0212   | -1.06 q < 0.833    | -1.25 q < 0.828    | -1.18 q < 0.955     |
| CYP4A11   | cytochrome P450, family 4, subfamily A, polypeptide 11                         | Ssc.15895.1.S1_s_at | 1.54 q < 0.00337   | 1.37 q < 1         | 1.22 q < 0.913     | 1.33 q < 0.626     | 2.82 q < 0.00838   | 1.38 q < 1          |
| STX8      | syntaxin 8                                                                     | Ssc.8421.1.S1_at    | -1.18 q < 0.00339  | -1.49 q < 0.00408  | 1 q < 1            | -1.21 q < 0.327    | 1 q < 1            | -1.25 q < 0.402     |
| STX8      | syntaxin 8                                                                     | Ssc.17842.2.S1_a_at | -1.14 q < 0.0052   | 1.03 q < 1         | -1.07 q < 0.896    | -1.2 q < 0.212     | -1.25 q < 0.303    | -1.22 q < 0.301     |
| C1orf135  | chromosome 1 open reading frame 135                                            | Ssc.25735.1.S1_at   | 1.11 q < 0.00347   | 1.1 q < 0.901      | 1.04 q < 0.932     | 1.25 q < 0.0184    | 1.08 q < 1         | 1.1 q < 1           |
| RXRG      | retinoid X receptor, gamma                                                     | Ssc.19608.1.S1_at   | 1.15 q < 0.00352   | 1.03 q < 1         | 1.1 q < 0.844      | 1.4 q < 0.00333    | 1.15 q < 1         | 1.1 q < 1           |
| SLK       | STE20-like kinase                                                              | Ssc.8732.1.A1_at    | -1.18 q < 0.00355  | -1.12 q < 1        | -1.47 q < 0.0108   | 1.03 q < 0.924     | -1.23 q < 0.925    | -1.17 q < 0.971     |
| SLK       | FYN oncogene related to SRC, FGR, YES                                          | Ssc.8732.1.A1_at    | -1.18 q < 0.00355  | -1.12 q < 1        | -1.47 q < 0.0108   | 1.03 q < 0.924     | -1.23 q < 0.925    | -1.17 q < 0.971     |

| Gene Name | Gene Description                                                                 | Probe Set ID         | Breed MS-WC        | Day 25 MS-WC      | Day 45 MS-WC     | Day 65 MS-WC      | Day 85 MS-WC       | Day 105 MS-WC       |
|-----------|----------------------------------------------------------------------------------|----------------------|--------------------|-------------------|------------------|-------------------|--------------------|---------------------|
| ENPP1     | ectonucleotide pyrophosphatase/phosphodiesterase 1                               | Ssc.4913.1.A1_at     | -1.24 q < 0.00359  | -1.09 q < 1       | -1.53 q < 0.0474 | -1.17 q < 0.595   | -1.13 q < 1        | -1.35 q < 0.433     |
| PEPD      | peptidase D                                                                      | Ssc.776.1.S1_a_at    | -1.25 q < 0.00378  | 1 q < 1           | -1.39 q < 0.251  | -1.21 q < 0.523   | -1.14 q < 1        | -1.61 q < 0.0254    |
| LYVE1     | lymphatic vessel endothelial hyaluronan receptor 1                               | Ssc.5047.1.A1_at     | -1.46 q < 0.00387  | -1.16 q < 1       | -1.33 q < 0.812  | -1.31 q < 0.596   | -1.51 q < 1        | -2.18 q < 0.034     |
| LYVE1     | lymphatic vessel endothelial hyaluronan receptor 1                               | Ssc.17343.1.S1_at    | -1.33 q < 0.00762  | -1.11 q < 1       | -1.25 q < 0.814  | -1.17 q < 0.714   | -1.37 q < 1        | -1.87 q < 0.0335    |
| GLRXL     | glutaredoxin (thioltransferase) pseudogene 3                                     | Ssc.709.1.S1_at      | -1.48 q < 0.00399  | -1.1 q < 1        | -1.29 q < 0.855  | -2.18 q < 0.0325  | -1.56 q < 1        | -1.47 q < 0.947     |
| HMGB3     | high-mobility group box 3                                                        | Ssc.11434.1.S1_at    | 1.26 q < 0.00406   | 1.06 q < 1        | -1.01 q < 0.997  | 1.76 q < 0.00346  | 1.27 q < 1         | 1.33 q < 0.594      |
| HMGB3     | high-mobility group box 3                                                        | Ssc.27311.1.S1_at    | 1.21 q < 0.00831   | 1.18 q < 1        | 1 q < 1          | 1.57 q < 0.0126   | 1.24 q < 1         | 1.14 q < 1          |
| EXOSC3    | exosome component 3                                                              | Ssc.24317.2.S1_at    | 1.14 q < 0.00407   | 1.15 q < 0.777    | 1.1 q < 0.809    | 1.3 q < 0.031     | 1.09 q < 1         | 1.07 q < 1          |
| NIT1      | nitrilase 1                                                                      | Ssc.1294.3.S1_at     | 1.16 q < 0.00407   | 1.04 q < 1        | 1.07 q < 0.921   | 1.38 q < 0.0185   | 1.22 q < 0.772     | 1.13 q < 1          |
| SIDT1     | SID1 transmembrane family, member 1                                              | Ssc.6634.1.A1_at     | 2.55 q < 0.00407   | 2.12 q < 1        | 2.86 q < 0.529   | 5.81 q < 0.0486   | 1.59 q < 1         | 1.91 q < 1          |
| SIDT1     | SID1 transmembrane family, member 1                                              | Ssc.26734.1.A1_at    | -1.17 q < 0.145    | -1.69 q < 0.0247  | -1.11 q < 0.917  | -1.07 q < 0.853   | -1.09 q < 1        | 1.01 q < 1          |
| ZNF716    | zinc finger protein 716                                                          | Ssc.27062.1.A1_at    | -1.21 q < 0.00408  | 1.01 q < 1        | -1.27 q < 0.403  | -1.12 q < 0.666   | -1.2 q < 1         | -1.51 q < 0.018     |
| ACLY      | ATP citrate lyase                                                                | Ssc.30707.1.S1_at    | 1.21 q < 0.00408   | 1.59 q < 0.0059   | -1.06 q < 0.943  | 1.3 q < 0.209     | 1.24 q < 1         | 1.07 q < 1          |
| PTX3      | pentraxin 3, long                                                                | Ssc.8162.2.S1_at     | -1.41 q < 0.00419  | -1.52 q < 0.581   | -2.04 q < 0.0309 | -1.45 q < 0.382   | -1.14 q < 1        | -1.09 q < 1         |
| PTX3      | pentraxin 3, long                                                                | Ssc.8162.1.S1_at     | -1.42 q < 0.0174   | -1.69 q < 0.494   | -2.01 q < 0.119  | -1.42 q < 0.506   | -1.29 q < 1        | 1.07 q < 1          |
| KIRREL3   | kin of IRRE like 3 (Drosophila)                                                  | Ssc.19197.2.A1_at    | 1.25 q < 0.00421   | 1 q < 1           | 1.21 q < 0.741   | 1.85 q < 0.000672 | -1.02 q < 1        | 1.38 q < 0.365      |
| NUDT9     | nudix (nucleoside diphosphate linked moiety X)-type motif 9                      | Ssc.23132.1.A1_at    | 1.2 q < 0.00422    | 1.29 q < 0.36     | 1.01 q < 0.995   | 1.46 q < 0.0222   | 1.08 q < 1         | 1.19 q < 0.937      |
| PRKAR2B   | protein kinase, cAMP-dependent, regulatory, type II, beta                        | Ssc.1056.1.A1_at     | -1.2 q < 0.00422   | -1.46 q < 0.0348  | -1.08 q < 0.919  | -1.18 q < 0.469   | -1.22 q < 1        | -1.08 q < 1         |
| ACSF2     | acyl-CoA synthetase family member 2                                              | Ssc.12161.1.S1_at    | -1.19 q < 0.00433  | 1.05 q < 1        | -1.42 q < 0.0367 | -1.22 q < 0.345   | -1.07 q < 1        | -1.33 q < 0.181     |
| PLSCR4    | phospholipid scramblase 4                                                        | Ssc.5708.1.A1_at     | 1.14 q < 0.00433   | 1.12 q < 1        | 1.06 q < 0.924   | 1.14 q < 0.452    | -1.02 q < 1        | 1.48 q < 0.000253   |
| F13A1     | coagulation factor XIII, A1 polypeptide                                          | Ssc.26345.1.S1_at    | -1.49 q < 0.00436  | -1.03 q < 1       | -1.4 q < 0.749   | 1.07 q < 0.923    | -1.41 q < 1        | -3.83 q < 0.0000104 |
| F13A1     | coagulation factor XIII, A1 polypeptide                                          | Ssc.26345.3.S1_at    | -1.18 q < 0.00473  | -1.13 q < 1       | -1.09 q < 0.903  | 1.1 q < 0.677     | -1.22 q < 1        | -1.66 q < 0.0000747 |
| CDK8      | cyclin-dependent kinase 8                                                        | Ssc.7933.1.A1_at     | -1.21 q < 0.00451  | -1 q < 1          | -1.48 q < 0.0315 | -1.1 q < 0.736    | -1.37 q < 0.272    | -1.14 q < 1         |
| PLA2G7    | phospholipase A2, group VII (platelet-activating factor acetylhydrolase, plasma) | Ssc.19691.1.S1_at    | -1.2 q < 0.00459   | 1.02 q < 1        | -1.11 q < 0.89   | -1.07 q < 0.822   | -1.51 q < 0.0251   | -1.43 q < 0.0597    |
| GBAS      | glioblastoma amplified sequence                                                  | Ssc.10949.1.S1_at    | -1.22 q < 0.00464  | -1.16 q < 1       | -1.52 q < 0.0243 | -1.16 q < 0.571   | -1.15 q < 1        | -1.13 q < 1         |
| SLC5A6    | solute carrier family 5 (sodium-dependent vitamin transporter), member 6         | Ssc.2516.3.S1_a_at   | 1.62 q < 0.00464   | 1.34 q < 1        | 1.72 q < 0.536   | 2.51 q < 0.0465   | 1.1 q < 1          | 1.74 q < 0.732      |
| SLC5A6    | solute carrier family 5 (sodium-dependent vitamin transporter), member 6         | Ssc.2516.2.S1_a_at   | 1.36 q < 0.0491    | 1.23 q < 1        | 1.29 q < 0.856   | 1.9 q < 0.117     | 1.01 q < 1         | 1.51 q < 0.875      |
| PSMA4     | proteasome (prosome, macropain) subunit, alpha type, 4                           | Ssc.30.1.S1_at       | 1.16 q < 0.00464   | 1.24 q < 0.358    | 1 q < 0.998      | 1.35 q < 0.0382   | 1.23 q < 0.694     | 1.03 q < 1          |
| CTR9      | Ctr9, Paf1/RNA polymerase II complex component, homolog (S. cerevisiae)          | Ssc.30790.1.A1_at    | 1.2 q < 0.00478    | 1.2 q < 0.857     | -1.03 q < 0.982  | 1.46 q < 0.0244   | 1.34 q < 0.409     | 1.09 q < 1          |
| CTR9      | Ctr9, Paf1/RNA polymerase II complex component, homolog (S. cerevisiae)          | Ssc.22181.1.S1_at    | 1.18 q < 0.0000152 | 1.14 q < 0.772    | 1.17 q < 0.396   | 1.23 q < 0.0866   | 1.15 q < 1         | 1.23 q < 0.139      |
| S100PBP   | S100P binding protein                                                            | Ssc.27465.1.S1_at    | -1.22 q < 0.00478  | -1.17 q < 1       | -1.31 q < 0.355  | 1.43 q < 0.0773   | -1.86 q < 0.000191 | -1.37 q < 0.288     |
| S100PBP   | S100P binding protein                                                            | Ssc.9376.1.A1_at     | -1.05 q < 0.715    | -1.08 q < 1       | -1.21 q < 0.57   | 1.55 q < 0.00359  | -1.36 q < 0.252    | -1.14 q < 1         |
| ARID1B    | AT rich interactive domain 1B (SWI1-like)                                        | Ssc.27166.1.S1_at    | -1.26 q < 0.00487  | -1.19 q < 1       | -1.08 q < 0.943  | -1.56 q < 0.0463  | -1.17 q < 1        | -1.36 q < 0.512     |
| ARID1B    | AT rich interactive domain 1B (SWI1-like)                                        | SscAffx.15.1.S1_s_at | 1.16 q < 0.00435   | 1.05 q < 1        | 1.01 q < 0.99    | 1.31 q < 0.0718   | 1.2 q < 1          | 1.27 q < 0.247      |
| XIAP      | X-linked inhibitor of apoptosis                                                  | Ssc.8950.1.A1_at     | 1.09 q < 0.00493   | 1.04 q < 1        | 1.07 q < 0.791   | 1.21 q < 0.0135   | 1.1 q < 1          | 1.04 q < 1          |
| XIAP      | X-linked inhibitor of apoptosis                                                  | Ssc.10175.1.S1_at    | -1.15 q < 0.0176   | -1.09 q < 1       | -1.41 q < 0.0287 | -1.02 q < 0.94    | -1.18 q < 1        | -1.1 q < 1          |
| RAMP3     | receptor (G protein-coupled) activity modifying protein 3                        | Ssc.15751.1.S1_a_at  | 1.16 q < 0.00506   | 1.08 q < 1        | -1.02 q < 0.987  | 1.12 q < 0.589    | 1.14 q < 1         | 1.56 q < 0.000227   |
| C4orf33   | chromosome 4 open reading frame 33                                               | Ssc.20478.1.S1_at    | 1.15 q < 0.00509   | 1.52 q < 0.000383 | 1.19 q < 0.488   | 1.11 q < 0.583    | 1.03 q < 1         | -1.01 q < 1         |
| GPATCH3   | G patch domain containing 3                                                      | Ssc.27126.1.A1_at    | 1.13 q < 0.00514   | 1.05 q < 1        | 1.06 q < 0.911   | 1.31 q < 0.0148   | 1.12 q < 1         | 1.13 q < 0.99       |
| ATP5J     | ATP synthase, H+ transporting, mitochondrial Fo complex, subunit F6              | Ssc.16536.1.S1_at    | -1.24 q < 0.00524  | 1 q < 1           | -1.65 q < 0.0143 | -1.24 q < 0.455   | -1.14 q < 1        | -1.29 q < 0.752     |
| TMEM144   | transmembrane protein 144                                                        | Ssc.23305.1.S1_at    | 1.28 q < 0.00524   | 1.12 q < 1        | -1.09 q < 0.943  | 1.44 q < 0.194    | 1.34 q < 1         | 1.74 q < 0.0213     |
| C12orf35  | chromosome 12 open reading frame 35                                              | Ssc.25441.2.S1_a_at  | 1.2 q < 0.00524    | 1.19 q < 0.901    | -1.13 q < 0.849  | 1.54 q < 0.0089   | 1.24 q < 1         | 1.25 q < 0.669      |
| SMYD2     | SET and MYND domain containing 2                                                 | Ssc.13656.1.S1_at    | 1.18 q < 0.00526   | -1.1 q < 1        | 1.02 q < 0.99    | 1.2 q < 0.383     | 1.41 q < 0.0727    | 1.47 q < 0.0131     |

| Gene Name | Gene Description                                                                | Probe Set ID      | Breed MS-WC       | Day 25 MS-WC        | Day 45 MS-WC     | Day 65 MS-WC      | Day 85 MS-WC     | Day 105 MS-WC        |
|-----------|---------------------------------------------------------------------------------|-------------------|-------------------|---------------------|------------------|-------------------|------------------|----------------------|
| ZNF662    | zinc finger protein 662                                                         | Ssc.24347.1.S1_at | 1.14 q < 0.00547  | 1.16 q < 0.787      | 1.08 q < 0.885   | 1.31 q < 0.0353   | 1.06 q < 1       | 1.13 q < 1           |
| AQP5      | aquaporin 5                                                                     | Ssc.25999.1.S1_at | -1.3 q < 0.00548  | -1.26 q < 0.986     | -1.71 q < 0.0422 | -1.02 q < 0.967   | -1.47 q < 0.59   | -1.15 q < 1          |
| BLMH      | bleomycin hydrolase                                                             | Ssc.11484.1.A1_at | -1.14 q < 0.00559 | 1.03 q < 1          | -1.32 q < 0.0403 | -1.04 q < 0.872   | -1.21 q < 0.636  | -1.22 q < 0.394      |
| FGL1      | fibrinogen-like 1                                                               | Ssc.20442.1.S1_at | 1.34 q < 0.00571  | -1.03 q < 1         | 1.26 q < 0.807   | 1.81 q < 0.034    | 1.49 q < 0.744   | 1.3 q < 1            |
| KLHL13    | kelch-like 13 (Drosophila)                                                      | Ssc.19801.1.S1_at | 1.31 q < 0.00604  | 1.4 q < 0.579       | 1.06 q < 0.965   | 1.87 q < 0.0107   | 1.13 q < 1       | 1.22 q < 1           |
| GOLPH3L   | golgi phosphoprotein 3-like                                                     | Ssc.16613.1.A1_at | 1.17 q < 0.00616  | 1.17 q < 0.872      | 1.12 q < 0.841   | 1.4 q < 0.0227    | 1.08 q < 1       | 1.1 q < 1            |
| MMP16     | matrix metalloproteinase 16 (membrane-inserted)                                 | Ssc.13435.1.A1_at | -1.3 q < 0.00628  | -2.38 q < 0.0000408 | -1.2 q < 0.843   | -1.13 q < 0.76    | -1.01 q < 1      | -1.12 q < 1          |
| MMP16     | matrix metalloproteinase 16 (membrane-inserted)                                 | Ssc.30826.1.A1_at | -1.12 q < 0.0692  | -1.56 q < 0.00025   | -1 q < 1         | -1.06 q < 0.796   | -1.03 q < 1      | -1.02 q < 1          |
| VT11A     | vesicle transport through interaction with t-SNAREs homolog 1A (yeast)          | Ssc.19072.1.A1_at | 1.13 q < 0.00629  | 1.02 q < 1          | 1.06 q < 0.907   | 1.28 q < 0.0371   | 1.18 q < 0.751   | 1.12 q < 1           |
| C19orf54  | chromosome 19 open reading frame 54                                             | Ssc.21879.1.S1_at | 1.17 q < 0.00636  | 1.18 q < 0.8        | -1.02 q < 0.983  | 1.49 q < 0.00267  | 1.1 q < 1        | 1.13 q < 1           |
| FCN2      | ficolin (collagen/fibrinogen domain containing lectin) 2 (hucolin)              | Ssc.137.1.S1_at   | -1.18 q < 0.00636 | -1.01 q < 1         | -1 q < 1         | -1.09 q < 0.705   | -1.15 q < 1      | -1.77 q < 0.00000906 |
| GJA1      | gap junction protein, alpha 1, 43kDa                                            | Ssc.15912.1.S1_at | -1.23 q < 0.00651 | -1.87 q < 0.000448  | -1.27 q < 0.546  | -1.1 q < 0.767    | 1.03 q < 1       | -1.13 q < 1          |
| MCC       | mutated in colorectal cancers                                                   | Ssc.18085.1.A1_at | 1.23 q < 0.00657  | 1.12 q < 1          | 1.17 q < 0.817   | 1.58 q < 0.0154   | 1.12 q < 1       | 1.19 q < 1           |
| PRKAA2    | protein kinase, AMP-activated, alpha 2 catalytic subunit                        | Ssc.16257.1.S1_at | 1.2 q < 0.00662   | 1.06 q < 1          | 1.15 q < 0.834   | 1.45 q < 0.0406   | 1.06 q < 1       | 1.34 q < 0.288       |
| RCAN1     | regulator of calcineurin 1                                                      | Ssc.3189.1.A1_at  | 1.32 q < 0.00683  | 1.07 q < 1          | 1.69 q < 0.0863  | 2.15 q < 0.00125  | 1.15 q < 1       | -1.13 q < 1          |
| RCAN1     | regulator of calcineurin 1                                                      | Ssc.9607.1.A1_at  | 1.19 q < 0.0929   | 1.04 q < 1          | 1.27 q < 0.687   | 1.76 q < 0.0112   | 1.13 q < 1       | -1.09 q < 1          |
| TBC1D4    | TBC1 domain family, member 4                                                    | Ssc.13357.1.A1_at | 1.21 q < 0.00702  | 1.62 q < 0.00859    | 1.1 q < 0.913    | 1.18 q < 0.54     | 1.05 q < 1       | 1.2 q < 1            |
| SPG20     | spastic paraplegia 20 (Troyer syndrome)                                         | Ssc.23990.1.A1_at | -1.21 q < 0.00708 | -1.1 q < 1          | -1.49 q < 0.0481 | -1.01 q < 0.984   | -1.24 q < 1      | -1.3 q < 0.565       |
| SPG20     | spastic paraplegia 20 (Troyer syndrome)                                         | Ssc.9916.1.S1_at  | -1.23 q < 0.0109  | -1.17 q < 1         | -1.7 q < 0.00816 | -1.03 q < 0.929   | -1.25 q < 1      | -1.08 q < 1          |
| SPG20     | spastic paraplegia 20 (Troyer syndrome)                                         | Ssc.14083.1.A1_at | 1.12 q < 0.354    | -1.21 q < 1         | 1.02 q < 0.99    | 1.73 q < 0.00748  | 1.09 q < 1       | 1.13 q < 1           |
| THNSL2    | threonine synthase-like 2 (S. cerevisiae)                                       | Ssc.4665.1.S1_at  | 1.11 q < 0.00711  | 1.11 q < 0.926      | 1.01 q < 0.987   | 1.24 q < 0.0433   | 1.09 q < 1       | 1.13 q < 0.854       |
| PMP22     | peripheral myelin protein 22                                                    | Ssc.11108.1.A1_at | -1.19 q < 0.00737 | 1.26 q < 0.526      | -1.24 q < 0.489  | -1.68 q < 0.00051 | -1.18 q < 1      | -1.24 q < 0.706      |
| PMP22     | peroxisomal membrane protein 2, 22kDa                                           | Ssc.11108.1.A1_at | -1.19 q < 0.00737 | 1.26 q < 0.526      | -1.24 q < 0.489  | -1.68 q < 0.00051 | -1.18 q < 1      | -1.24 q < 0.706      |
| NFIL3     | nuclear factor, interleukin 3 regulated                                         | Ssc.16882.1.A1_at | 1.17 q < 0.00741  | 1.44 q < 0.0202     | 1.12 q < 0.841   | 1.19 q < 0.412    | 1.01 q < 1       | 1.14 q < 1           |
| NFIL3     | nuclear factor, interleukin 3 regulated                                         | Ssc.29480.1.A1_at | 1.11 q < 0.0337   | 1.03 q < 1          | 1.13 q < 0.726   | 1.24 q < 0.13     | 1.03 q < 1       | 1.17 q < 0.728       |
| CD163     | CD163 molecule                                                                  | Ssc.11991.1.A1_at | -1.19 q < 0.00743 | -1.21 q < 0.817     | -1.07 q < 0.934  | -1.05 q < 0.855   | -1.16 q < 1      | -1.53 q < 0.0116     |
| CD163     | CD163 molecule                                                                  | Ssc.5053.1.S1_at  | -1.26 q < 0.0741  | -1.1 q < 1          | -1.22 q < 0.876  | -1.12 q < 0.817   | -1.08 q < 1      | -1.99 q < 0.0274     |
| PCSK1     | proprotein convertase subtilisin/kexin type 1                                   | Ssc.141.1.S1_at   | -1.43 q < 0.00748 | 1.04 q < 1          | 1 q < 0.999      | -1.35 q < 0.547   | -2.11 q < 0.0809 | -2.18 q < 0.034      |
| PDGFRL    | platelet-derived growth factor receptor-like                                    | Ssc.1161.1.A1_at  | -1.4 q < 0.00757  | -2.4 q < 0.00461    | -1.38 q < 0.708  | -1.15 q < 0.796   | -1.06 q < 1      | -1.34 q < 1          |
| PDGFRL    | platelet-derived growth factor receptor-like                                    | Ssc.1161.2.S1_at  | -1.14 q < 0.0994  | -1.66 q < 0.00109   | -1.15 q < 0.804  | 1.12 q < 0.647    | -1.03 q < 1      | -1.08 q < 1          |
| LCP1      | lymphocyte cytosolic protein 1 (L-plastin)                                      | Ssc.9330.1.A1_at  | -1.17 q < 0.00791 | -1.11 q < 1         | -1 q < 0.997     | -1.1 q < 0.667    | -1.15 q < 1      | -1.52 q < 0.00243    |
| LCP1      | lymphocyte cytosolic protein 1 (L-plastin)                                      | Ssc.23774.3.S1_at | -1.15 q < 0.0352  | 1 q < 1             | -1.11 q < 0.881  | -1.05 q < 0.843   | -1.11 q < 1      | -1.55 q < 0.00334    |
| LCP1      | TOX high mobility group box family member 4                                     | Ssc.9330.1.A1_at  | -1.17 q < 0.00791 | -1.11 q < 1         | -1 q < 0.997     | -1.1 q < 0.667    | -1.15 q < 1      | -1.52 q < 0.00243    |
| LCP1      | TOX high mobility group box family member 4                                     | Ssc.23774.3.S1_at | -1.15 q < 0.0352  | 1 q < 1             | -1.11 q < 0.881  | -1.05 q < 0.843   | -1.11 q < 1      | -1.55 q < 0.00334    |
| CLIC5     | chloride intracellular channel 5                                                | Ssc.21139.2.S1_at | -1.23 q < 0.00798 | -1.03 q < 1         | -1.08 q < 0.94   | -1.53 q < 0.0378  | -1.38 q < 0.519  | -1.19 q < 1          |
| CLIC5     | chloride intracellular channel 5                                                | Ssc.21139.1.S1_at | -1.15 q < 0.00582 | -1.01 q < 1         | -1.03 q < 0.96   | -1.26 q < 0.122   | -1.23 q < 0.584  | -1.24 q < 0.325      |
| CLIC5     | chloride intracellular channel 6                                                | Ssc.21139.2.S1_at | -1.23 q < 0.00798 | -1.03 q < 1         | -1.08 q < 0.94   | -1.53 q < 0.0378  | -1.38 q < 0.519  | -1.19 q < 1          |
| CLIC5     | chloride intracellular channel 6                                                | Ssc.21139.1.S1_at | -1.15 q < 0.00582 | -1.01 q < 1         | -1.03 q < 0.96   | -1.26 q < 0.122   | -1.23 q < 0.584  | -1.24 q < 0.325      |
| SLC25A1   | solute carrier family 25 (mitochondrial carrier, citrate transporter), member 1 | Ssc.17264.1.S1_at | 1.23 q < 0.00802  | 1.95 q < 0.000131   | -1.25 q < 0.629  | 1.34 q < 0.244    | 1.25 q < 1       | 1.07 q < 1           |
| OLFM3     | olfactomedin 3                                                                  | Ssc.8494.1.A1_at  | -1.26 q < 0.0081  | -1.67 q < 0.036     | -1.14 q < 0.898  | -1.27 q < 0.439   | -1.08 q < 1      | -1.21 q < 1          |
| SEPHS2    | selenophosphate synthetase 2                                                    | Ssc.15219.1.S1_at | -1.25 q < 0.00818 | 1.22 q < 1          | -1.55 q < 0.0829 | -1.16 q < 0.649   | -1.23 q < 1      | -1.7 q < 0.016       |
| SEPHS2    | selenophosphate synthetase 2                                                    | Ssc.4475.1.S1_at  | -1.24 q < 0.028   | 1.21 q < 1          | -1.52 q < 0.163  | -1.08 q < 0.842   | -1.33 q < 1      | -1.61 q < 0.09       |
| SS18L2    | synovial sarcoma translocation gene on chromosome 18-like 2                     | Ssc.5794.1.S1_at  | 1.18 q < 0.00831  | 1.02 q < 1          | 1.05 q < 0.956   | 1.49 q < 0.0105   | 1.25 q < 0.884   | 1.15 q < 1           |
| RHD       | Rh blood group, D antigen                                                       | Ssc.14472.1.S1_at | 1.17 q < 0.0084   | 1.8 q < 0.00000863  | 1.03 q < 0.976   | 1.09 q < 0.708    | 1.04 q < 1       | 1.06 q < 1           |
| ROGDI     | rogdi homolog (Drosophila)                                                      | Ssc.2167.3.A1_at  | 1.17 q < 0.00858  | 1.01 q < 1          | 1.18 q < 0.659   | 1.43 q < 0.0201   | 1.12 q < 1       | 1.16 q < 1           |
| FER       | fer (fps/fes related) tyrosine kinase                                           | Ssc.12515.1.S1_at | -1.09 q < 0.00874 | -1.01 q < 1         | -1.18 q < 0.127  | -1.02 q < 0.91    | -1.03 q < 1      | -1.26 q < 0.0069     |

| Gene Name | Gene Description                                                                       | Probe Set ID        | Breed MS-WC       | Day 25 MS-WC        | Day 45 MS-WC      | Day 65 MS-WC       | Day 85 MS-WC    | Day 105 MS-WC      |
|-----------|----------------------------------------------------------------------------------------|---------------------|-------------------|---------------------|-------------------|--------------------|-----------------|--------------------|
| PLA1A     | phospholipase A1 member A                                                              | Ssc.11422.1.A1_at   | -1.21 q < 0.00875 | 1.12 q < 1          | -1.51 q < 0.0338  | -1.34 q < 0.179    | -1.34 q < 0.531 | -1.05 q < 1        |
| KDSR      | 3-ketodihydroshingosine reductase                                                      | Ssc.18314.2.A1_at   | 1.26 q < 0.00878  | 1.04 q < 1          | 1.23 q < 0.762    | 1.95 q < 0.000797  | 1.05 q < 1      | 1.2 q < 1          |
| NAGA      | N-acetylgalactosaminidase, alpha-                                                      | Ssc.8873.1.A1_at    | 1.35 q < 0.00886  | 1.23 q < 1          | 1.39 q < 0.615    | 1.01 q < 0.983     | 1.25 q < 1      | 2.08 q < 0.013     |
| BCAS2     | breast carcinoma amplified sequence 2                                                  | Ssc.6999.1.S1_at    | -1.15 q < 0.00896 | -1.1 q < 1          | -1.39 q < 0.0176  | 1.03 q < 0.91      | -1.12 q < 1     | -1.2 q < 0.608     |
| PHLDA2    | pleckstrin homology-like domain, family A, member 2                                    | Ssc.9796.1.A1_at    | 1.23 q < 0.00896  | 1.16 q < 1          | 1.16 q < 0.845    | 1.73 q < 0.00313   | 1.13 q < 1      | 1.06 q < 1         |
| KDEL2     | KDEL (Lys-Asp-Glu-Leu) endoplasmic reticulum protein retention receptor 2              | Ssc.997.3.A1_at     | 1.29 q < 0.009    | 1.28 q < 0.924      | 1.09 q < 0.946    | 1.74 q < 0.0262    | 1.37 q < 1      | 1.07 q < 1         |
| RPL28     | ribosomal protein L28                                                                  | Ssc.1500.1.S1_a_at  | -1.16 q < 0.00908 | -1.04 q < 1         | -1.21 q < 0.468   | -1.12 q < 0.585    | -1.03 q < 1     | -1.43 q < 0.013    |
| SLC35A3   | solute carrier family 35 (UDP-N-acetylglucosamine (UDP-GlcNAc) transporter), member A3 | Ssc.24284.1.S1_at   | -1.32 q < 0.00924 | -1.24 q < 1         | -1.82 q < 0.0422  | 1.07 q < 0.888     | -1.38 q < 1     | -1.38 q < 0.844    |
| SLC13A4   | solute carrier family 13 (sodium/sulfate symporters), member 4                         | Ssc.5486.1.S1_at    | 1.55 q < 0.00932  | 1.58 q < 0.867      | 1.08 q < 0.98     | 2.92 q < 0.00968   | 1.09 q < 1      | 1.66 q < 0.826     |
| SLC13A4   | solute carrier family 13 (sodium/sulfate symporters), member 4                         | Ssc.5486.2.A1_at    | 1.4 q < 0.0304    | 1.62 q < 0.648      | 1.06 q < 0.982    | 2.07 q < 0.0758    | 1.03 q < 1      | 1.48 q < 0.998     |
| ACSL6     | acyl-CoA synthetase long-chain family member 6                                         | Ssc.11255.1.A1_at   | 1.13 q < 0.00936  | 1.08 q < 1          | 1.09 q < 0.849    | 1.03 q < 0.896     | -1.02 q < 1     | 1.55 q < 0.000144  |
| ACOT4     | acyl-CoA thioesterase 4                                                                | Ssc.18475.3.A1_at   | -1.26 q < 0.00937 | -1.28 q < 0.837     | -1.65 q < 0.0367  | -1.15 q < 0.693    | 1.07 q < 1      | -1.39 q < 0.491    |
| NAP1L5    | nucleosome assembly protein 1-like 5                                                   | Ssc.5726.1.S1_at    | 1.27 q < 0.0095   | 1.08 q < 1          | 1.02 q < 0.99     | 1.64 q < 0.0404    | 1.25 q < 1      | 1.45 q < 0.363     |
| C10orf57  | chromosome 10 open reading frame 57                                                    | Ssc.8441.1.A1_at    | -1.25 q < 0.00962 | 1.06 q < 1          | -1.79 q < 0.00629 | -1.18 q < 0.617    | -1.26 q < 1     | -1.22 q < 1        |
| C10orf57  | chromosome 10 open reading frame 57                                                    | Ssc.8099.1.S1_at    | 1.6 q < 0.025     | 1.56 q < 1          | 1.85 q < 0.553    | 2.41 q < 0.135     | 1.03 q < 1      | 1.48 q < 1         |
| NCOA1     | nuclear receptor coactivator 1                                                         | Ssc.24299.1.S1_at   | 1.17 q < 0.00967  | 1.04 q < 1          | 1.04 q < 0.958    | 1.68 q < 0.000066  | 1.07 q < 1      | 1.12 q < 1         |
| FAM12B    | epididymal protein 3B                                                                  | Ssc.350.1.S1_at     | -1.29 q < 0.00971 | 1.08 q < 1          | -1.94 q < 0.00703 | -1.02 q < 0.976    | -1.42 q < 0.906 | -1.39 q < 0.663    |
| NBEA      | neurobeachin                                                                           | Ssc.13921.1.S1_at   | -1.27 q < 0.00998 | -1.14 q < 1         | -1.35 q < 0.5     | -1.64 q < 0.0446   | -1.12 q < 1     | -1.17 q < 1        |
| GGT6      | gamma-glutamyltransferase 6                                                            | Ssc.25647.1.S1_at   | 1.29 q < 0.01     | -1.08 q < 1         | -1.28 q < 0.719   | 2.36 q < 0.0000664 | 1.38 q < 1      | 1.52 q < 0.308     |
| NDUFA9    | NADH dehydrogenase (ubiquinone) 1 alpha subcomplex, 9, 39kDa                           | Ssc.1239.1.A1_at    | 1.17 q < 0.0101   | 1.13 q < 1          | 1.06 q < 0.937    | 1.45 q < 0.0134    | 1.12 q < 1      | 1.12 q < 1         |
| CTSS      | cathepsin S                                                                            | Ssc.17203.3.S1_at   | -1.3 q < 0.0102   | -1.15 q < 1         | -1.18 q < 0.881   | -1.06 q < 0.896    | -1.16 q < 1     | -2.25 q < 0.000598 |
| CTSS      | cathepsin S                                                                            | Ssc.17203.1.A1_at   | -1.34 q < 0.0396  | -1.1 q < 1          | -1.35 q < 0.769   | -1.16 q < 0.782    | -1.1 q < 1      | -2.26 q < 0.0186   |
| PITPNC1   | phosphatidylinositol transfer protein, cytoplasmic 1                                   | Ssc.21539.2.A1_at   | 1.19 q < 0.0103   | 1.11 q < 1          | -1.01 q < 0.996   | 1.53 q < 0.0134    | 1.25 q < 1      | 1.16 q < 1         |
| RPL36A    | ribosomal protein L36a                                                                 | Ssc.13585.7.S1_a_at | 1.16 q < 0.0104   | 1.06 q < 1          | 1.14 q < 0.781    | 1.39 q < 0.0285    | 1.2 q < 1       | 1.04 q < 1         |
| RPL36A    | ribosomal protein L36a                                                                 | Ssc.13585.8.S1_x_at | 1.12 q < 0.0323   | 1.02 q < 1          | 1.13 q < 0.741    | 1.3 q < 0.0491     | 1.2 q < 0.821   | -1.02 q < 1        |
| RPL36A    | ribosomal protein L36a-like                                                            | Ssc.13585.7.S1_a_at | 1.16 q < 0.0104   | 1.06 q < 1          | 1.14 q < 0.781    | 1.39 q < 0.0285    | 1.2 q < 1       | 1.04 q < 1         |
| RPL36A    | ribosomal protein L36a-like                                                            | Ssc.13585.8.S1_x_at | 1.12 q < 0.0323   | 1.02 q < 1          | 1.13 q < 0.741    | 1.3 q < 0.0491     | 1.2 q < 0.821   | -1.02 q < 1        |
| ZMYM3     | zinc finger, MYM-type 3                                                                | Ssc.3316.1.A1_at    | 1.16 q < 0.0105   | 1.16 q < 0.927      | -1.16 q < 0.713   | 1.43 q < 0.0156    | 1.25 q < 0.744  | 1.19 q < 0.832     |
| CNTLN     | centlein, centrosomal protein                                                          | Ssc.25950.1.S1_at   | -1.11 q < 0.0106  | -1.29 q < 0.0228    | -1.05 q < 0.925   | -1.04 q < 0.834    | -1.11 q < 1     | -1.09 q < 1        |
| MSRB2     | methionine sulfoxide reductase B2                                                      | Ssc.11012.1.A1_at   | -1.16 q < 0.0107  | -1.04 q < 1         | -1.44 q < 0.0168  | -1.15 q < 0.507    | -1.13 q < 1     | -1.09 q < 1        |
| MPDU1     | mannose-P-dolichol utilization defect 1                                                | Ssc.1400.1.A1_at    | 1.17 q < 0.0109   | 1.28 q < 0.348      | -1.03 q < 0.974   | 1.39 q < 0.0425    | 1.17 q < 1      | 1.08 q < 1         |
| CXXC5     | CXXC finger 5                                                                          | Ssc.24142.1.S1_at   | 1.15 q < 0.0111   | 1.07 q < 1          | 1.09 q < 0.892    | 1.38 q < 0.0169    | 1.1 q < 1       | 1.13 q < 1         |
| INPPL1    | inositol polyphosphate phosphatase-like 1                                              | Ssc.2346.1.S1_at    | -1.1 q < 0.0111   | -1.24 q < 0.0332    | -1.08 q < 0.804   | -1.1 q < 0.489     | -1.08 q < 1     | -1 q < 1           |
| PCOLCE2   | procollagen C-endopeptidase enhancer 2                                                 | Ssc.8758.1.A1_at    | -1.32 q < 0.0112  | -1.87 q < 0.0408    | -1.57 q < 0.241   | -1.29 q < 0.525    | -1.16 q < 1     | 1.1 q < 1          |
| PECI      | peroxisomal D3,D2-enoyl-CoA isomerase                                                  | Ssc.10932.1.S1_at   | -1.22 q < 0.0117  | 1.1 q < 1           | -1.77 q < 0.00246 | -1.26 q < 0.41     | -1.23 q < 1     | -1.1 q < 1         |
| PABPC1    | poly(A) binding protein, cytoplasmic 1                                                 | Ssc.1158.1.A1_at    | -1.13 q < 0.0119  | 1.01 q < 1          | -1.13 q < 0.67    | -1.31 q < 0.0243   | -1.07 q < 1     | -1.16 q < 0.768    |
| TMEM181   | transmembrane protein 181                                                              | Ssc.24633.1.A1_at   | 1.18 q < 0.0119   | 1.05 q < 1          | 1.32 q < 0.22     | 1.5 q < 0.0111     | 1.04 q < 1      | 1.05 q < 1         |
| EGR1      | early growth response 1                                                                | Ssc.19629.1.A1_at   | 1.44 q < 0.012    | 1.32 q < 1          | 1.61 q < 0.475    | 2.53 q < 0.00714   | -1.01 q < 1     | 1.15 q < 1         |
| EGR1      | early growth response 1                                                                | Ssc.16460.1.S1_at   | -1.28 q < 0.00901 | -1.63 q < 0.0912    | -1.29 q < 0.659   | 1.04 q < 0.927     | -1.29 q < 1     | -1.31 q < 0.895    |
| GPT2      | glutamic pyruvate transaminase (alanine aminotransferase) 2                            | Ssc.7458.1.A1_at    | -1.27 q < 0.0121  | -2.41 q < 0.0000117 | 1.01 q < 0.997    | -1.28 q < 0.468    | -1.13 q < 1     | 1.06 q < 1         |
| GPT2      | glutamic pyruvate transaminase (alanine aminotransferase) 2                            | Ssc.27024.1.S1_at   | -1.05 q < 0.799   | -1.51 q < 0.0457    | 1.05 q < 0.962    | 1.07 q < 0.816     | 1 q < 1         | 1.04 q < 1         |
| ABCG2     | ATP-binding cassette, sub-family G (WHITE), member 2                                   | Ssc.25103.1.S1_at   | 1.16 q < 0.0124   | 1.07 q < 1          | 1.44 q < 0.0163   | 1.13 q < 0.581     | 1.05 q < 1      | 1.14 q < 1         |
| TMEM77    | DNA-damage regulated autophagy modulator 2                                             | Ssc.25450.1.S1_at   | -1.14 q < 0.0125  | -1.16 q < 0.796     | -1.37 q < 0.0232  | 1.12 q < 0.551     | -1.2 q < 0.935  | -1.14 q < 1        |
| CDC14A    | CDC14 cell division cycle 14 homolog A (S. cerevisiae)                                 | Ssc.13784.1.A1_at   | 1.12 q < 0.0126   | -1.01 q < 1         | 1.1 q < 0.812     | 1.3 q < 0.0278     | 1.11 q < 1      | 1.14 q < 0.896     |

| Gene Name | Gene Description                                                            | Probe Set ID      | Breed MS-WC      | Day 25 MS-WC             | Day 45 MS-WC      | Day 65 MS-WC        | Day 85 MS-WC    | Day 105 MS-WC        |
|-----------|-----------------------------------------------------------------------------|-------------------|------------------|--------------------------|-------------------|---------------------|-----------------|----------------------|
| PDLIM5    | PDZ and LIM domain 5                                                        | Ssc.29166.1.A1_at | 1.15 q < 0.0128  | 1.05 q < 1               | 1.14 q < 0.752    | 1.35 q < 0.0473     | 1.22 q < 0.921  | 1.03 q < 1           |
| PDLIM5    | PDZ and LIM domain 5                                                        | Ssc.3783.1.S1_at  | -1.25 q < 0.0149 | -1.25 q < 0.927          | -1.37 q < 0.403   | -1.07 q < 0.868     | -1.26 q < 1     | -1.3 q < 0.862       |
| CCND2     | cyclin D2                                                                   | Ssc.15749.1.S1_at | -1.24 q < 0.013  | 1.16 q < 1               | -1.71 q < 0.0131  | -1.4 q < 0.197      | -1.22 q < 1     | -1.16 q < 1          |
| MTHFD1L   | methylenetetrahydrofolate dehydrogenase (NADP+ dependent) 1-like            | Ssc.9594.1.A1_at  | -1.14 q < 0.0131 | -1.38 q < 0.0309         | -1.16 q < 0.65    | -1.04 q < 0.86      | -1.04 q < 1     | -1.13 q < 1          |
| DPP10     | dipeptidyl-peptidase 10 (non-functional)                                    | Ssc.13053.1.A1_at | 1.19 q < 0.0132  | 1.1 q < 1                | 1.14 q < 0.843    | 1.68 q < 0.000966   | 1.44 q < 0.114  | -1.28 q < 0.559      |
| ORC3L     | origin recognition complex, subunit 3-like (yeast)                          | Ssc.24532.1.S1_at | 1.18 q < 0.0132  | 1.01 q < 1               | 1.04 q < 0.965    | 1.47 q < 0.0266     | 1.17 q < 1      | 1.29 q < 0.456       |
| RPS27     | ribosomal protein S27                                                       | Ssc.4805.1.S1_at  | 1.2 q < 0.0133   | 1.09 q < 1               | -1.04 q < 0.977   | 1.48 q < 0.0433     | 1.17 q < 1      | 1.37 q < 0.269       |
| C1orf77   | chromosome 1 open reading frame 77                                          | Ssc.7483.1.A1_at  | -1.16 q < 0.0135 | -1 q < 1                 | -1.5 q < 0.0053   | -1.11 q < 0.655     | -1.05 q < 1     | -1.2 q < 0.767       |
| JAK1      | Janus kinase 1                                                              | Ssc.328.1.A1_at   | -1.15 q < 0.0137 | -1.16 q < 0.89           | -1.39 q < 0.0304  | -1.08 q < 0.734     | -1.11 q < 1     | -1.05 q < 1          |
| SPG7      | spastic paraplegia 7 (pure and complicated autosomal recessive)             | Ssc.1399.1.S1_at  | 1.14 q < 0.0138  | 1 q < 1                  | -1.02 q < 0.987   | 1.39 q < 0.0111     | 1.17 q < 1      | 1.2 q < 0.6          |
| PSMD9     | proteasome (prosome, macropain) 26S subunit, non-ATPase, 9                  | Ssc.3258.1.S1_at  | -1.13 q < 0.014  | -1.16 q < 0.681          | -1.33 q < 0.0211  | -1.03 q < 0.878     | -1.1 q < 1      | -1.03 q < 1          |
| CFP       | complement factor properdin                                                 | Ssc.27474.1.S1_at | -1.17 q < 0.0141 | -1.15 q < 1              | -1.13 q < 0.846   | -1.04 q < 0.898     | -1.09 q < 1     | -1.5 q < 0.0122      |
| ATG4A     | ATG4 autophagy related 4 homolog A (S. cerevisiae)                          | Ssc.9516.1.A1_at  | 1.17 q < 0.0142  | 1.06 q < 1               | -1.01 q < 0.996   | 1.63 q < 0.000797   | 1.07 q < 1      | 1.21 q < 0.844       |
| MAGEB3    | melanoma antigen family B, 3                                                | Ssc.25444.1.S1_at | 1.15 q < 0.0145  | -1.07 q < 1              | 1.16 q < 0.648    | 1.44 q < 0.005      | 1.13 q < 1      | 1.11 q < 1           |
| MVP       | major vault protein                                                         | Ssc.21214.1.A1_at | -1.15 q < 0.0149 | -1.41 q < 0.0332         | -1.08 q < 0.915   | -1.02 q < 0.957     | -1.14 q < 1     | -1.17 q < 0.949      |
| C7orf42   | chromosome 7 open reading frame 42                                          | Ssc.18341.1.A1_at | -1.13 q < 0.0151 | -1.18 q < 0.64           | -1.41 q < 0.00485 | 1.01 q < 0.955      | -1.05 q < 1     | -1.07 q < 1          |
| TNFAIP1   | tumor necrosis factor, alpha-induced protein 1 (endothelial)                | Ssc.6549.1.S1_at  | 1.27 q < 0.0151  | 1.47 q < 0.36            | -1.07 q < 0.958   | 1.28 q < 0.485      | 1.85 q < 0.0216 | 1.02 q < 1           |
| ARID4B    | AT rich interactive domain 4B (RBP1-like)                                   | Ssc.2575.1.S1_at  | 1.1 q < 0.0158   | 1.03 q < 1               | 1.06 q < 0.901    | 1.14 q < 0.321      | 1.04 q < 1      | 1.25 q < 0.0317      |
| LONP1     | lon peptidase 1, mitochondrial                                              | Ssc.1154.1.A1_at  | -1.1 q < 0.0159  | -1.05 q < 1              | -1.23 q < 0.0469  | -1.01 q < 0.979     | -1.02 q < 1     | -1.19 q < 0.155      |
| IKBKG     | inhibitor of kappa light polypeptide gene enhancer in B-cells, kinase gamma | Ssc.25274.1.A1_at | -1.13 q < 0.0161 | 1.02 q < 1               | -1.36 q < 0.0175  | 1.05 q < 0.812      | -1.2 q < 0.823  | -1.21 q < 0.437      |
| FAM81B    | family with sequence similarity 81, member B                                | Ssc.30843.1.A1_at | -1.2 q < 0.0165  | 1.04 q < 1               | 1 q < 1           | -1.25 q < 0.361     | -1.02 q < 1     | -1.99 q < 0.0000107  |
| CD320     | CD320 molecule                                                              | Ssc.12524.1.S1_at | 1.17 q < 0.0167  | 1.15 q < 1               | 1.07 q < 0.936    | -1.09 q < 0.732     | 1.13 q < 1      | 1.69 q < 0.000142    |
| MARCKS    | myristoylated alanine-rich protein kinase C substrate                       | Ssc.1228.1.S1_at  | -1.19 q < 0.017  | -1.06 q < 1              | -1.55 q < 0.0188  | -1.07 q < 0.827     | 1 q < 1         | -1.36 q < 0.259      |
| TMEM68    | transmembrane protein 68                                                    | Ssc.6834.1.A1_at  | 1.21 q < 0.017   | 1.05 q < 1               | 1.08 q < 0.94     | 1.54 q < 0.0321     | 1.13 q < 1      | 1.31 q < 0.598       |
| DLG5      | discs, large homolog 5 (Drosophila)                                         | Ssc.12059.1.A1_at | 1.23 q < 0.0174  | 1.02 q < 1               | 1.08 q < 0.941    | 1.57 q < 0.0433     | 1.33 q < 1      | 1.21 q < 1           |
| C8orf4    | chromosome 8 open reading frame 4                                           | Ssc.13156.2.S1_at | 1.25 q < 0.0178  | 1.23 q < 1               | 1.26 q < 0.711    | 1.97 q < 0.00148    | -1.06 q < 1     | 1.06 q < 1           |
| OPRS1     | sigma non-opioid intracellular receptor 1                                   | Ssc.16410.1.A1_at | 1.21 q < 0.0182  | 1.45 q < 0.151           | -1.18 q < 0.802   | 1.54 q < 0.0308     | 1.25 q < 1      | 1.07 q < 1           |
| CACNA1B   | calcium channel, voltage-dependent, N type, alpha 1B subunit                | Ssc.19324.2.S1_at | 1.12 q < 0.0193  | 1.02 q < 1               | 1.11 q < 0.777    | 1.39 q < 0.00273    | 1.04 q < 1      | 1.08 q < 1           |
| NF1       | neurofibromin 1                                                             | Ssc.5446.1.S1_at  | -1.12 q < 0.0194 | -1.04 q < 1              | -1.37 q < 0.00418 | -1.02 q < 0.913     | -1.11 q < 1     | -1.07 q < 1          |
| PTPN21    | protein tyrosine phosphatase, non-receptor type 21                          | Ssc.4953.1.A1_at  | -1.21 q < 0.0194 | -1.05 q < 1              | 1.19 q < 0.792    | -1.39 q < 0.163     | -1.28 q < 1     | -1.67 q < 0.0117     |
| CYP19A1   | cytochrome P450, family 19, subfamily A, polypeptide 1                      | Ssc.16184.1.S1_at | 1.14 q < 0.0199  | 1.02 q < 1               | 1.27 q < 0.171    | 1.33 q < 0.0456     | 1.01 q < 1      | 1.09 q < 1           |
| CYP19A1   | cytochrome P450, family 19, subfamily A, polypeptide 1                      | Ssc.4548.1.A1_at  | 1.15 q < 0.41    | 1 q < 1                  | 1.12 q < 0.934    | 1.8 q < 0.0324      | -1.04 q < 1     | 1.02 q < 1           |
| MYOZ1     | myozenin 1                                                                  | Ssc.10961.1.S1_at | 1.1 q < 0.0199   | 1.02 q < 1               | 1.07 q < 0.878    | 1.25 q < 0.0317     | 1.12 q < 1      | 1.06 q < 1           |
| FER1L3    | myoferlin                                                                   | Ssc.3692.1.A1_at  | -1.21 q < 0.0199 | -1.1 q < 1               | -1.26 q < 0.617   | -1.03 q < 0.932     | -1.18 q < 1     | -1.57 q < 0.0491     |
| MGLL      | monoglyceride lipase                                                        | Ssc.8436.1.S1_at  | 1.23 q < 0.02    | -1.02 q < 1              | -1.08 q < 0.944   | 2.28 q < 0.00000741 | 1.06 q < 1      | 1.29 q < 0.871       |
| SREBF2    | sterol regulatory element binding transcription factor 2                    | Ssc.16976.1.S1_at | 1.18 q < 0.0208  | 1.2 q < 0.891            | -1.13 q < 0.865   | 1.5 q < 0.0201      | 1.13 q < 1      | 1.26 q < 0.659       |
| RPLP0P2   | ribosomal protein, large, P0 pseudogene 2                                   | Ssc.929.2.S1_at   | -1.08 q < 0.0208 | -1.01 q < 1              | -1.17 q < 0.13    | -1.1 q < 0.395      | 1.09 q < 1      | -1.26 q < 0.00629    |
| GRK7      | G protein-coupled receptor kinase 7                                         | Ssc.29960.1.A1_at | 1.13 q < 0.021   | 1.01 q < 1               | 1.22 q < 0.31     | 1.4 q < 0.00617     | 1.02 q < 1      | 1.05 q < 1           |
| FCGR3B    | Fc fragment of IgG, low affinity IIb, receptor (CD16b)                      | Ssc.167.2.S1_a_at | -1.26 q < 0.0218 | 1 q < 1                  | -1.09 q < 0.943   | -1.18 q < 0.66      | 1.01 q < 1      | -2.51 q < 0.00000952 |
| C6orf106  | chromosome 6 open reading frame 106                                         | Ssc.4073.1.S1_at  | 1.1 q < 0.0226   | 1.07 q < 1               | -1.04 q < 0.932   | 1.37 q < 0.000283   | 1.05 q < 1      | 1.08 q < 1           |
| RPL13     | ribosomal protein L13                                                       | Ssc.769.1.S1_a_at | -1.1 q < 0.0228  | 1.05 q < 1               | -1.15 q < 0.443   | -1.11 q < 0.475     | -1.05 q < 1     | -1.25 q < 0.0401     |
| RPL13     | mitochondrial ribosomal protein L13                                         | Ssc.769.1.S1_a_at | -1.1 q < 0.0228  | 1.05 q < 1               | -1.15 q < 0.443   | -1.11 q < 0.475     | -1.05 q < 1     | -1.25 q < 0.0401     |
| ECH1      | enoyl CoA hydratase 1, peroxisomal                                          | Ssc.5099.1.S1_at  | 1.16 q < 0.0228  | 1.07 q < 1               | 1 q < 0.997       | 1.41 q < 0.0336     | 1.3 q < 0.519   | 1.06 q < 1           |
| HBD       | hemoglobin, delta                                                           | Ssc.7157.1.A1_at  | 1.19 q < 0.0228  | 2.61 q < 0.0000000000471 | -1.29 q < 0.436   | -1.02 q < 0.967     | 1.03 q < 1      | 1.16 q < 1           |

| Gene Name | Gene Description                                                                                 | Probe Set ID      | Breed MS-WC      | Day 25 MS-WC             | Day 45 MS-WC      | Day 65 MS-WC      | Day 85 MS-WC     | Day 105 MS-WC          |
|-----------|--------------------------------------------------------------------------------------------------|-------------------|------------------|--------------------------|-------------------|-------------------|------------------|------------------------|
| HBD       | keratin 121 pseudogene                                                                           | Ssc.7157.1.A1_at  | 1.19 q < 0.0228  | 2.61 q < 0.0000000000471 | -1.29 q < 0.436   | -1.02 q < 0.967   | 1.03 q < 1       | 1.16 q < 1             |
| HBD       | hemoglobin, beta                                                                                 | Ssc.7157.1.A1_at  | 1.19 q < 0.0228  | 2.61 q < 0.0000000000471 | -1.29 q < 0.436   | -1.02 q < 0.967   | 1.03 q < 1       | 1.16 q < 1             |
| SPR       | sepiapterin reductase (7,8-dihydrobiopterin:NADP+ oxidoreductase)                                | Ssc.11252.1.S1_at | -1.24 q < 0.0239 | 1.27 q < 0.899           | -1.28 q < 0.654   | -1.09 q < 0.822   | -1.4 q < 0.75    | -1.89 q < 0.00412      |
| SPR       | tachykinin receptor 1                                                                            | Ssc.11252.1.S1_at | -1.24 q < 0.0239 | 1.27 q < 0.899           | -1.28 q < 0.654   | -1.09 q < 0.822   | -1.4 q < 0.75    | -1.89 q < 0.00412      |
| ZFY       | zinc finger protein, Y-linked                                                                    | Ssc.25078.1.S1_at | 1.19 q < 0.0239  | 1.11 q < 1               | 1.03 q < 0.982    | 1.64 q < 0.00397  | 1.04 q < 1       | 1.21 q < 1             |
| BRF1      | BRF1 homolog, subunit of RNA polymerase III transcription initiation factor IIIB (S. cerevisiae) | Ssc.11687.1.A1_at | 1.09 q < 0.0243  | -1.01 q < 1              | 1.02 q < 0.975    | 1.31 q < 0.000995 | 1.05 q < 1       | 1.11 q < 0.925         |
| BRF1      | zinc finger protein 36, C3H type-like 1                                                          | Ssc.11687.1.A1_at | 1.09 q < 0.0243  | -1.01 q < 1              | 1.02 q < 0.975    | 1.31 q < 0.000995 | 1.05 q < 1       | 1.11 q < 0.925         |
| GSTA1     | glutathione S-transferase alpha 1                                                                | Ssc.8516.1.A1_at  | -1.2 q < 0.0247  | -1.04 q < 1              | 1.07 q < 0.946    | -1.16 q < 0.624   | -1.22 q < 1      | -1.83 q < 0.000847     |
| ADRB1     | adrenergic, beta-1-, receptor                                                                    | Ssc.16075.1.S1_at | 1.13 q < 0.0249  | -1.04 q < 1              | -1.02 q < 0.982   | 1.23 q < 0.194    | 1.17 q < 1       | 1.36 q < 0.0322        |
| MAGOHB    | mago-nashi homolog B (Drosophila)                                                                | Ssc.21714.1.S1_at | 1.11 q < 0.025   | 1.48 q < 0.0000358       | 1.02 q < 0.981    | 1.08 q < 0.666    | 1.01 q < 1       | 1.01 q < 1             |
| MED19     | mediator complex subunit 19                                                                      | Ssc.26132.1.S1_at | 1.13 q < 0.0251  | 1.01 q < 1               | 1.04 q < 0.946    | 1.42 q < 0.00411  | 1.13 q < 1       | 1.07 q < 1             |
| CCL2      | chemokine (C-C motif) ligand 2                                                                   | Ssc.657.1.A1_at   | -1.27 q < 0.0257 | -1.09 q < 1              | -1.04 q < 0.981   | -1.03 q < 0.96    | -1.02 q < 1      | -2.76 q < 0.0000167    |
| ACOT11    | acyl-CoA thioesterase 11                                                                         | Ssc.9743.1.A1_at  | -1.26 q < 0.0259 | -1.23 q < 1              | -1.03 q < 0.988   | 1.07 q < 0.876    | 1.22 q < 1       | -3.21 q < 0.0000000244 |
| ZFX       | zinc finger protein, X-linked                                                                    | Ssc.15967.1.A1_at | 1.12 q < 0.0277  | 1.05 q < 1               | 1.06 q < 0.918    | 1.31 q < 0.0456   | 1.04 q < 1       | 1.18 q < 0.681         |
| BF711022  | -                                                                                                | Ssc.9600.1.A1_at  | 1.14 q < 0.0278  | 1.07 q < 1               | 1.03 q < 0.976    | 1.35 q < 0.0472   | 1.08 q < 1       | 1.2 q < 0.742          |
| VSIG4     | V-set and immunoglobulin domain containing 4                                                     | Ssc.16640.1.A1_at | -1.22 q < 0.0278 | -1.04 q < 1              | -1.12 q < 0.911   | -1.11 q < 0.769   | -1.07 q < 1      | -1.93 q < 0.000805     |
| AMIGO2    | adhesion molecule with Ig-like domain 2                                                          | Ssc.30916.1.A1_at | 1.2 q < 0.0281   | 1.15 q < 1               | -1 q < 0.997      | 1.02 q < 0.962    | 1.27 q < 1       | 1.68 q < 0.00838       |
| PPP1R12A  | protein phosphatase 1, regulatory (inhibitor) subunit 12A                                        | Ssc.6525.2.A1_at  | 1.24 q < 0.0283  | 1.84 q < 0.00872         | 1.11 q < 0.928    | 1.18 q < 0.647    | 1.12 q < 1       | 1.08 q < 1             |
| SLC25A38  | solute carrier family 25, member 38                                                              | Ssc.6273.1.A1_at  | -1.14 q < 0.0283 | -1.15 q < 0.943          | -1.42 q < 0.0125  | 1.11 q < 0.632    | -1.05 q < 1      | -1.22 q < 0.557        |
| SLC25A43  | solute carrier family 25, member 43                                                              | Ssc.12402.1.A1_at | 1.2 q < 0.0283   | 1.03 q < 1               | 1.26 q < 0.622    | 1.54 q < 0.0463   | 1.2 q < 1        | 1.06 q < 1             |
| CYP4A22   | cytochrome P450, family 4, subfamily A, polypeptide 22                                           | Ssc.190.1.S1_at   | 1.13 q < 0.0285  | 1.09 q < 1               | 1.09 q < 0.885    | -1.02 q < 0.924   | 1.46 q < 0.00304 | 1.07 q < 1             |
| PALLD     | palladin, cytoskeletal associated protein                                                        | Ssc.7463.1.A1_at  | -1.22 q < 0.0285 | -1.02 q < 1              | -1.51 q < 0.118   | -1.67 q < 0.0153  | -1.21 q < 1      | 1.17 q < 1             |
| CPOX      | coproporphyrinogen oxidase                                                                       | Ssc.3633.1.S1_at  | 1.33 q < 0.0288  | 1.57 q < 0.503           | 1 q < 1           | 1.97 q < 0.0396   | 1.18 q < 1       | 1.15 q < 1             |
| SKP2      | S-phase kinase-associated protein 2 (p45)                                                        | Ssc.23085.1.S1_at | 1.14 q < 0.0288  | 1.24 q < 0.437           | -1.03 q < 0.977   | 1.56 q < 0.000444 | 1.02 q < 1       | -1 q < 1               |
| TMEM98    | transmembrane protein 98                                                                         | Ssc.11555.1.S1_at | 1.19 q < 0.0291  | 2.01 q < 0.0000167       | 1.03 q < 0.981    | 1.07 q < 0.836    | 1.01 q < 1       | 1.05 q < 1             |
| COL1A1    | collagen, type I, alpha 1                                                                        | Ssc.1091.1.S1_at  | -1.52 q < 0.0294 | -1.04 q < 1              | -1.75 q < 0.556   | 1.22 q < 0.793    | -1.39 q < 1      | -3.96 q < 0.00125      |
| COL1A1    | collagen, type I, alpha 1                                                                        | Ssc.1091.2.S1_at  | -1.5 q < 0.0484  | -1.28 q < 1              | -2 q < 0.37       | -1.03 q < 0.977   | -1.09 q < 1      | -2.63 q < 0.091        |
| C11orf59  | chromosome 11 open reading frame 59                                                              | Ssc.3302.1.S1_at  | -1.14 q < 0.0295 | -1.17 q < 0.843          | -1.38 q < 0.0306  | -1.02 q < 0.95    | -1.04 q < 1      | -1.11 q < 1            |
| HLA-DMA   | major histocompatibility complex, class II, DM alpha                                             | Ssc.13777.1.S1_at | -1.14 q < 0.0304 | 1 q < 1                  | -1.03 q < 0.975   | -1.07 q < 0.77    | -1.04 q < 1      | -1.71 q < 0.00002      |
| SLC16A9   | solute carrier family 16, member 9 (monocarboxylic acid transporter 9)                           | Ssc.3909.1.A1_at  | 1.24 q < 0.0307  | 1.1 q < 1                | 1.22 q < 0.808    | -1.34 q < 0.371   | 1.28 q < 1       | 2.28 q < 0.0000573     |
| SLC16A9   | solute carrier family 16, member 9 (monocarboxylic acid transporter 9)                           | Ssc.24682.1.S1_at | 1.04 q < 0.709   | -1.04 q < 1              | -1.02 q < 0.977   | -1.02 q < 0.932   | -1 q < 1         | 1.31 q < 0.0243        |
| TMEM87A   | transmembrane protein 87A                                                                        | Ssc.1852.1.S1_at  | 1.14 q < 0.0308  | 1.14 q < 1               | -1.08 q < 0.911   | 1.21 q < 0.344    | 1.11 q < 1       | 1.39 q < 0.0491        |
| MGST2     | microsomal glutathione S-transferase 2                                                           | Ssc.21635.1.A1_at | 1.28 q < 0.0308  | 1.19 q < 1               | 1.01 q < 0.996    | 2.06 q < 0.00582  | 1.29 q < 1       | 1.08 q < 1             |
| PFN1      | profilin 1                                                                                       | Ssc.835.1.S1_at   | -1.28 q < 0.0316 | 1.03 q < 1               | -1.73 q < 0.0948  | -1.63 q < 0.125   | 1.5 q < 0.747    | -1.9 q < 0.0288        |
| LBR       | lamin B receptor                                                                                 | Ssc.22874.1.S1_at | -1.18 q < 0.032  | 1.15 q < 1               | -1.66 q < 0.00462 | 1.14 q < 0.637    | -1.31 q < 0.813  | -1.4 q < 0.202         |
| IRF5      | interferon regulatory factor 5                                                                   | Ssc.5480.1.S1_at  | -1.1 q < 0.0325  | -1.01 q < 1              | -1.11 q < 0.724   | 1.04 q < 0.843    | 1.01 q < 1       | -1.49 q < 0.0000051    |
| PTBP2     | polypyrimidine tract binding protein 2                                                           | Ssc.18855.1.A1_at | -1.13 q < 0.0329 | 1.2 q < 0.542            | -1.5 q < 0.000875 | -1.15 q < 0.45    | -1.09 q < 1      | -1.15 q < 0.956        |
| ETS2      | v-ets erythroblastosis virus E26 oncogene homolog 2 (avian)                                      | Ssc.18456.2.S1_at | 1.17 q < 0.0331  | 1.19 q < 0.95            | -1.05 q < 0.958   | 1.53 q < 0.0169   | 1.17 q < 1       | 1.09 q < 1             |
| ETS2      | v-ets erythroblastosis virus E26 oncogene homolog 2 (avian)                                      | Ssc.6163.1.A1_at  | 1.15 q < 0.148   | 1.07 q < 1               | 1.05 q < 0.959    | 1.65 q < 0.00888  | 1.02 q < 1       | 1.05 q < 1             |
| CDK2      | cyclin-dependent kinase 2                                                                        | Ssc.16532.1.S1_at | 1.11 q < 0.0337  | 1.15 q < 0.787           | -1.05 q < 0.93    | 1.34 q < 0.0137   | 1.13 q < 1       | 1.04 q < 1             |
| LAMB2     | laminin, beta 2 (laminin 5)                                                                      | Ssc.5067.1.S1_at  | -1.15 q < 0.0337 | -1.1 q < 1               | -1.45 q < 0.0295  | -1.1 q < 0.706    | -1.17 q < 1      | 1 q < 1                |
| LAMB2     | laminin, gamma 1 (formerly LAMB2)                                                                | Ssc.5067.1.S1_at  | -1.15 q < 0.0337 | -1.1 q < 1               | -1.45 q < 0.0295  | -1.1 q < 0.706    | -1.17 q < 1      | 1 q < 1                |
| DNMT1     | DNA (cytosine-5)-methyltransferase 1                                                             | Ssc.28025.1.A1_at | 1.12 q < 0.034   | 1.05 q < 1               | 1.13 q < 0.701    | 1.3 q < 0.045     | 1.1 q < 1        | 1.03 q < 1             |

| Gene Name | Gene Description                                                                                             | Probe Set ID       | Breed MS-WC           | Day 25 MS-WC        | Day 45 MS-WC        | Day 65 MS-WC        | Day 85 MS-WC     | Day 105 MS-WC       |
|-----------|--------------------------------------------------------------------------------------------------------------|--------------------|-----------------------|---------------------|---------------------|---------------------|------------------|---------------------|
| GSTO1     | glutathione S-transferase omega 1                                                                            | Ssc.183.1.S1_at    | -1.19 q < 0.034       | 1.48 q < 0.117      | -1.13 q < 0.895     | -1.51 q < 0.0476    | -1.37 q < 0.574  | -1.53 q < 0.0585    |
| PCBD2     | pterin-4 alpha-carbinolamine dehydratase/dimerization cofactor of hepatocyte nuclear factor 1 alpha (TCF1) 2 | Ssc.6520.1.A1_at   | 1.15 q < 0.0354       | 1.47 q < 0.0152     | -1.05 q < 0.952     | 1.11 q < 0.666      | 1.2 q < 1        | 1.06 q < 1          |
| STIM1     | stromal interaction molecule 1                                                                               | Ssc.23482.1.S1_at  | 1.16 q < 0.0355       | -1.02 q < 1         | 1.02 q < 0.989      | 1.51 q < 0.00896    | 1.24 q < 1       | 1.1 q < 1           |
| REM1      | RAS (RAD and GEM)-like GTP-binding 1                                                                         | Ssc.17853.1.A1_at  | -1.14 q < 0.0356      | -1.73 q < 0.0000216 | -1.25 q < 0.36      | 1.01 q < 0.965      | -1.07 q < 1      | 1.17 q < 1          |
| BI400739  | -                                                                                                            | Ssc.10356.1.A1_at  | 1.13 q < 0.0357       | -1.03 q < 1         | 1.21 q < 0.447      | 1.36 q < 0.0391     | 1.05 q < 1       | 1.11 q < 1          |
| IGF2      | insulin-like growth factor 2 (somatomedin A)                                                                 | Ssc.9365.6.S1_x_at | -1.12 q < 0.0366      | -1.36 q < 0.0365    | -1.26 q < 0.181     | 1.04 q < 0.855      | -1.02 q < 1      | -1.07 q < 1         |
| IGF2      | insulin-like growth factor 2 (somatomedin A)                                                                 | Ssc.9365.1.S1_at   | -1.05 q < 0.751       | -1.25 q < 0.547     | -1.21 q < 0.607     | 1.56 q < 0.00413    | -1.3 q < 0.554   | -1.02 q < 1         |
| STC1      | stanniocalcin 1                                                                                              | Ssc.2464.1.S1_at   | 1.12 q < 0.0386       | 1.05 q < 1          | -1.15 q < 0.663     | 1.05 q < 0.803      | 1.1 q < 1        | 1.66 q < 0.00000194 |
| PTK2      | PTK2 protein tyrosine kinase 2                                                                               | Ssc.9581.1.A1_at   | 1.1 q < 0.0392        | -1 q < 1            | 1.02 q < 0.976      | 1.31 q < 0.01       | 1.06 q < 1       | 1.13 q < 0.867      |
| SPARC     | secreted protein, acidic, cysteine-rich (osteonectin)                                                        | Ssc.1458.3.A1_a_at | -1.13 q < 0.0392      | -1.02 q < 1         | -1.51 q < 0.000939  | -1.07 q < 0.764     | -1.07 q < 1      | -1.03 q < 1         |
| INSIG1    | insulin induced gene 1                                                                                       | Ssc.15598.1.S1_at  | 1.23 q < 0.0394       | 1.34 q < 0.723      | -1.11 q < 0.929     | 1.67 q < 0.0406     | 1.2 q < 1        | 1.18 q < 1          |
| CMTM4     | CKLF-like MARVEL transmembrane domain containing 4                                                           | Ssc.19203.2.S1_at  | 1.16 q < 0.0403       | -1.02 q < 1         | -1.03 q < 0.982     | 1.51 q < 0.0119     | 1.21 q < 1       | 1.19 q < 1          |
| NPDC1     | neural proliferation, differentiation and control, 1                                                         | Ssc.21971.2.S1_at  | -1.13 q < 0.0409      | -1.03 q < 1         | -1.39 q < 0.0178    | -1.12 q < 0.569     | -1.27 q < 0.396  | 1.13 q < 1          |
| ZC3H13    | zinc finger CCCH-type containing 13                                                                          | Ssc.10054.1.S1_at  | -1.11 q < 0.0429      | 1.03 q < 1          | -1.31 q < 0.0416    | -1.05 q < 0.803     | -1.09 q < 1      | -1.17 q < 0.685     |
| UBA5      | ubiquitin-like modifier activating enzyme 5                                                                  | Ssc.25021.1.S1_at  | 1.12 q < 0.0437       | 1.14 q < 0.984      | 1.05 q < 0.946      | 1.35 q < 0.032      | 1.02 q < 1       | 1.1 q < 1           |
| BLVRB     | biliverdin reductase B (flavin reductase (NADPH))                                                            | Ssc.1338.1.S1_at   | 1.21 q < 0.0438       | 1.98 q < 0.000598   | -1.02 q < 0.991     | 1.14 q < 0.7        | -1 q < 1         | 1.17 q < 1          |
| UCP2      | uncoupling protein 2 (mitochondrial, proton carrier)                                                         | Ssc.16350.1.S1_at  | -1.12 q < 0.0456      | -1.11 q < 1         | -1.02 q < 0.982     | 1.05 q < 0.83       | -1.14 q < 1      | -1.4 q < 0.0067     |
| CSRP2     | cysteine and glycine-rich protein 2                                                                          | Ssc.11530.1.S1_at  | 1.22 q < 0.0457       | 1.16 q < 1          | 1.07 q < 0.958      | 2.08 q < 0.000325   | 1.05 q < 1       | -1 q < 1            |
| PROM2     | prominin 2                                                                                                   | Ssc.27157.2.S1_at  | 1.26 q < 0.0471       | 1.09 q < 1          | -1.11 q < 0.94      | 1.81 q < 0.0371     | 1.26 q < 1       | 1.45 q < 0.639      |
| GULP1     | GULP, engulfment adaptor PTB domain containing 1                                                             | Ssc.19175.3.A1_at  | 1.17 q < 0.0481       | 1.03 q < 1          | 1.08 q < 0.939      | 1.52 q < 0.0316     | 1.11 q < 1       | 1.19 q < 1          |
| TTC3      | tetratricopeptide repeat domain 3                                                                            | Ssc.27325.1.S1_at  | -1.1 q < 0.0484       | -1.33 q < 0.0157    | -1.11 q < 0.749     | -1.18 q < 0.251     | 1.01 q < 1       | 1.06 q < 1          |
| SPEF1     | sperm flagellar 1                                                                                            | Ssc.30895.2.A1_at  | -1.1 q < 0.0498       | -1.3 q < 0.0386     | -1 q < 0.997        | -1.1 q < 0.555      | -1.04 q < 1      | -1.08 q < 1         |
| ABCC5     | ATP-binding cassette, sub-family C (CFTR/MRP), member 5                                                      | Ssc.1657.1.S1_at   | 1.18 q < 0.167        | -1.13 q < 1         | -1.29 q < 0.67      | 1.72 q < 0.0324     | 1.14 q < 1       | 1.72 q < 0.0463     |
| ABCC5     | ATP-binding cassette, sub-family C (CFTR/MRP), member 5                                                      | Ssc.6425.1.A1_at   | 1.2 q < 0.124         | -1.1 q < 1          | -1.15 q < 0.91      | 1.6 q < 0.0931      | 1.09 q < 1       | 1.79 q < 0.0285     |
| Q8WUC5    | -                                                                                                            | Ssc.11616.1.S1_at  | -1.11 q < 0.285       | -1.02 q < 1         | -1.55 q < 0.0125    | 1.55 q < 0.00954    | -1.35 q < 0.42   | -1.21 q < 0.937     |
| VAV3      | vav 3 guanine nucleotide exchange factor                                                                     | Ssc.12682.1.A1_at  | -1.07 q < 0.572       | -1.49 q < 0.00959   | -1.44 q < 0.0254    | 1.05 q < 0.851      | 1.22 q < 1       | 1.21 q < 0.769      |
| ERAF      | alpha hemoglobin stabilizing protein                                                                         | Ssc.1354.1.S1_at   | 1.07 q < 0.809        | 1.75 q < 0.0431     | -1.79 q < 0.0232    | -1.12 q < 0.771     | 1.23 q < 1       | 1.29 q < 1          |
| ARHGAP12  | Rho GTPase activating protein 12                                                                             | Ssc.19040.1.A1_at  | -1.02 q < 0.899       | -1.07 q < 1         | -1.14 q < 0.529     | -1.43 q < 0.0000664 | 1.23 q < 0.204   | 1.31 q < 0.0108     |
| ARHGAP12  | Rho GTPase activating protein 12                                                                             | Ssc.11354.1.A1_at  | -1.21 q < 0.0242      | -1.33 q < 0.539     | -1.19 q < 0.812     | -1.13 q < 0.694     | -1.16 q < 1      | -1.25 q < 0.931     |
| NPL       | N-acetylneuraminatase pyruvate lyase (dihydrodipicolinate synthase)                                          | Ssc.23640.1.S1_at  | -1.01 q < 0.96        | -1 q < 1            | -1.09 q < 0.885     | -1.35 q < 0.0321    | -1.04 q < 1      | 1.46 q < 0.00365    |
| FAM162B   | family with sequence similarity 162, member B                                                                | Ssc.6162.2.S1_at   | -1.01 q < 0.965       | 1.06 q < 1          | -1.52 q < 0.0227    | 1.04 q < 0.902      | -1.18 q < 1      | 1.52 q < 0.0243     |
| FAM162B   | family with sequence similarity 162, member B                                                                | Ssc.6162.1.A1_at   | 1.04 q < 0.844        | 1.06 q < 1          | -1.41 q < 0.0703    | 1.15 q < 0.579      | -1.15 q < 1      | 1.62 q < 0.00184    |
| ASB11     | ankyrin repeat and SOCS box-containing 11                                                                    | Ssc.12849.1.A1_at  | 1.02 q < 0.97         | -1.07 q < 1         | -3.47 q < 0.0000706 | 2.92 q < 0.000985   | 1.02 q < 1       | 1.4 q < 1           |
| TMEM16C   | anoctamin 3                                                                                                  | Ssc.8291.1.A1_at   | -1.01 q < 0.978       | -1.51 q < 0.00393   | -1.06 q < 0.94      | -1.02 q < 0.958     | -1.04 q < 1      | 1.62 q < 0.000257   |
| CNIH4     | cornichon homolog 4 (Drosophila)                                                                             | Ssc.11342.1.A1_at  | -1.38 q < 0.000000274 | -1.43 q < 0.117     | -1.33 q < 0.267     | -1.28 q < 0.288     | -1.51 q < 0.0521 | -1.33 q < 0.367     |
| DSCR3     | Down syndrome critical region gene 3                                                                         | Ssc.5989.1.S1_at   | -1.25 q < 0.000000632 | -1.2 q < 0.512      | -1.32 q < 0.0551    | -1.27 q < 0.0959    | -1.22 q < 0.636  | -1.24 q < 0.328     |
| PTGES3    | prostaglandin E synthase 3 (cytosolic)                                                                       | Ssc.25850.1.A1_at  | 2.1 q < 0.000000748   | 2.09 q < 0.265      | 2.37 q < 0.0932     | 2.07 q < 0.152      | 2.17 q < 0.356   | 1.85 q < 0.56       |
| STAG2     | stromal antigen 2                                                                                            | Ssc.30423.1.A1_at  | -1.32 q < 0.00000133  | -1.28 q < 0.425     | -1.39 q < 0.0932    | -1.3 q < 0.177      | -1.39 q < 0.17   | -1.24 q < 0.709     |
| TMEM69    | transmembrane protein 69                                                                                     | Ssc.9306.1.A1_at   | 1.45 q < 0.00000296   | 1.53 q < 0.159      | 1.28 q < 0.646      | 1.51 q < 0.11       | 1.54 q < 0.229   | 1.39 q < 0.505      |
| TOR1B     | torsin family 1, member B (torsin B)                                                                         | Ssc.6881.1.A1_s_at | -1.2 q < 0.00000336   | -1.26 q < 0.108     | -1.23 q < 0.147     | -1.08 q < 0.654     | -1.25 q < 0.2    | -1.21 q < 0.325     |
| DSCAM     | Down syndrome cell adhesion molecule                                                                         | Ssc.4500.1.S1_at   | -1.21 q < 0.00000423  | -1.29 q < 0.0691    | -1.18 q < 0.434     | -1.19 q < 0.237     | -1.17 q < 1      | -1.24 q < 0.228     |
| NAV1      | neuron navigator 1                                                                                           | Ssc.4867.1.S1_at   | -1.29 q < 0.00000444  | -1.18 q < 0.91      | -1.31 q < 0.232     | -1.37 q < 0.0663    | -1.34 q < 0.311  | -1.28 q < 0.434     |
| LYSM3     | LysM, putative peptidoglycan-binding, domain containing 3                                                    | Ssc.10088.1.A1_at  | -1.32 q < 0.00000843  | -1.45 q < 0.0752    | -1.21 q < 0.648     | -1.16 q < 0.581     | -1.49 q < 0.0593 | -1.31 q < 0.416     |
| CDC5L     | CDC5 cell division cycle 5-like (S. pombe)                                                                   | Ssc.19068.1.A1_at  | 1.29 q < 0.00000918   | 1.33 q < 0.257      | 1.22 q < 0.545      | 1.41 q < 0.0519     | 1.33 q < 0.409   | 1.19 q < 0.971      |
| ZDHC7     | zinc finger, DHHC-type containing 7                                                                          | Ssc.3617.2.S1_at   | -1.25 q < 0.000013    | -1.22 q < 0.539     | -1.23 q < 0.372     | -1.21 q < 0.303     | -1.31 q < 0.281  | -1.27 q < 0.313     |
| EPCY      | epiphycan                                                                                                    | Ssc.9725.1.A1_at   | -1.4 q < 0.0000169    | -1.09 q < 1         | -1.57 q < 0.0726    | -1.37 q < 0.265     | -1.48 q < 0.358  | -1.53 q < 0.126     |



| Gene Name | Gene Description                                                            | Probe Set ID        | Breed MS-WC         | Day 25 MS-WC     | Day 45 MS-WC     | Day 65 MS-WC     | Day 85 MS-WC     | Day 105 MS-WC    |
|-----------|-----------------------------------------------------------------------------|---------------------|---------------------|------------------|------------------|------------------|------------------|------------------|
| C18orf19  | chromosome 18 open reading frame 19                                         | Ssc.3529.1.A1_at    | -1.19 q < 0.0000208 | 1.01 q < 1       | -1.26 q < 0.0745 | -1.23 q < 0.103  | -1.25 q < 0.185  | -1.22 q < 0.264  |
| UBE2G2    | ubiquitin-conjugating enzyme E2G 2 (UBC7 homolog, yeast)                    | Ssc.5115.1.S1_at    | -1.24 q < 0.0000216 | -1.2 q < 0.664   | -1.34 q < 0.0722 | -1.16 q < 0.454  | -1.26 q < 0.542  | -1.24 q < 0.453  |
| RRP12     | ribosomal RNA processing 12 homolog (S. cerevisiae)                         | Ssc.24912.1.S1_at   | -1.24 q < 0.0000244 | -1.17 q < 0.837  | -1.33 q < 0.0932 | -1.33 q < 0.0714 | -1.29 q < 0.366  | -1.1 q < 1       |
| PTK7      | PTK7 protein tyrosine kinase 7                                              | Ssc.28680.1.S1_at   | -1.26 q < 0.0000249 | -1.41 q < 0.0526 | -1.35 q < 0.11   | -1.18 q < 0.468  | -1.17 q < 1      | -1.22 q < 0.717  |
| PLAA      | phospholipase A2-activating protein                                         | Ssc.16422.2.A1_at   | -1.22 q < 0.0000348 | -1.32 q < 0.0784 | -1.28 q < 0.142  | -1.11 q < 0.612  | -1.36 q < 0.0587 | -1.05 q < 1      |
| MACF1     | microtubule-actin crosslinking factor 1                                     | Ssc.5639.2.S1_at    | -1.22 q < 0.0000377 | -1.22 q < 0.486  | -1.3 q < 0.124   | -1.19 q < 0.353  | -1.24 q < 0.604  | -1.18 q < 0.848  |
| SLC30A9   | solute carrier family 30 (zinc transporter), member 9                       | Ssc.7040.2.A1_at    | -1.29 q < 0.0000439 | -1.37 q < 0.189  | -1.4 q < 0.105   | -1.17 q < 0.524  | -1.31 q < 0.621  | -1.19 q < 1      |
| COMM7     | COMM domain containing 7                                                    | Ssc.11716.1.S1_a_at | 1.32 q < 0.0000483  | 1.44 q < 0.161   | 1.21 q < 0.712   | 1.29 q < 0.317   | 1.27 q < 1       | 1.42 q < 0.196   |
| EXDL1     | exonuclease 3'-5' domain containing 1                                       | Ssc.10798.1.A1_at   | -1.18 q < 0.0000503 | -1.04 q < 1      | -1.22 q < 0.184  | -1.18 q < 0.255  | -1.28 q < 0.079  | -1.18 q < 0.513  |
| HTR3B     | 5-hydroxytryptamine (serotonin) receptor 3B                                 | Ssc.26752.1.S1_at   | -1.21 q < 0.0000503 | -1.1 q < 1       | -1.31 q < 0.0796 | -1.3 q < 0.072   | -1.23 q < 0.679  | -1.14 q < 1      |
| LFNG      | LFNG O-fucosylpeptide 3-beta-N-acetylglucosaminyltransferase                | Ssc.19531.1.A1_at   | -1.22 q < 0.0000616 | -1.23 q < 0.432  | -1.2 q < 0.457   | -1.12 q < 0.563  | -1.27 q < 0.366  | -1.26 q < 0.277  |
| ZCCHC24   | zinc finger, CCHC domain containing 24                                      | Ssc.12014.2.A1_at   | -1.25 q < 0.000062  | -1.39 q < 0.0766 | -1.29 q < 0.243  | -1.31 q < 0.136  | -1.14 q < 1      | -1.14 q < 1      |
| ZCCHC24   | zinc finger, CCHC domain containing 24                                      | Ssc.16810.1.S1_at   | -1.23 q < 0.00246   | -1.16 q < 1      | -1.4 q < 0.127   | -1.27 q < 0.304  | -1.14 q < 1      | -1.19 q < 1      |
| EGFR      | epidermal growth factor receptor                                            | Ssc.55.1.S1_at      | -1.37 q < 0.0000817 | -1.59 q < 0.0794 | -1.38 q < 0.372  | -1.18 q < 0.612  | -1.37 q < 0.848  | -1.35 q < 0.646  |
| ACACA     | acetyl-CoA carboxylase alpha                                                | Ssc.17769.1.S1_at   | 1.22 q < 0.0000838  | 1.16 q < 0.855   | 1.06 q < 0.93    | 1.32 q < 0.0634  | 1.26 q < 0.498   | 1.3 q < 0.152    |
| FAU       | Finkel-Biskis-Reilly murine sarcoma virus (FBR-MuSV) ubiquitously expressed | Ssc.11087.1.S1_at   | -1.15 q < 0.0000838 | -1.01 q < 1      | -1.24 q < 0.051  | -1.19 q < 0.129  | -1.1 q < 1       | -1.23 q < 0.0899 |
| AIFM2     | apoptosis-inducing factor, mitochondrion-associated, 2                      | Ssc.2487.1.S1_at    | 1.24 q < 0.0000866  | 1 q < 1          | 1.23 q < 0.439   | 1.32 q < 0.111   | 1.42 q < 0.0556  | 1.27 q < 0.39    |
| AIFM2     | apoptosis-inducing factor, mitochondrion-associated, 2                      | Ssc.2487.2.S1_at    | 1.2 q < 0.00858     | 1.01 q < 1       | 1.24 q < 0.527   | 1.31 q < 0.196   | 1.35 q < 0.415   | 1.1 q < 1        |
| RNF12     | ring finger protein, LIM domain interacting                                 | Ssc.9094.1.A1_at    | -1.23 q < 0.0000892 | -1.21 q < 0.671  | -1.23 q < 0.429  | -1.22 q < 0.317  | -1.28 q < 0.472  | -1.23 q < 0.587  |
| RGS2      | regulator of G-protein signaling 2, 24kDa                                   | Ssc.3139.1.A1_at    | -1.46 q < 0.0001    | -1.67 q < 0.153  | -1.3 q < 0.73    | -1.21 q < 0.644  | -1.4 q < 1       | -1.82 q < 0.0502 |
| CYP51A1   | cytochrome P450, family 51, subfamily A, polypeptide 1                      | Ssc.5712.1.S1_at    | 1.38 q < 0.000109   | 1.51 q < 0.217   | 1.09 q < 0.942   | 1.52 q < 0.115   | 1.4 q < 0.774    | 1.44 q < 0.394   |
| HOXB6     | homeobox B6                                                                 | Ssc.13232.1.A1_at   | 1.21 q < 0.000118   | 1.24 q < 0.41    | 1.09 q < 0.884   | 1.28 q < 0.111   | 1.24 q < 0.664   | 1.22 q < 0.533   |
| OLFML3    | olfactomedin-like 3                                                         | Ssc.15592.1.S1_at   | -1.36 q < 0.00012   | -1.61 q < 0.0712 | -1.39 q < 0.36   | -1.55 q < 0.0706 | -1.07 q < 1      | -1.27 q < 0.971  |
| BAG3      | BCL2-associated athanogene 3                                                | Ssc.13649.1.S1_at   | -1.35 q < 0.000126  | -1.28 q < 0.819  | -1.52 q < 0.11   | -1.32 q < 0.344  | -1.45 q < 0.444  | -1.22 q < 1      |
| Q9H3B5    | -                                                                           | Ssc.16863.1.S1_at   | -1.22 q < 0.000136  | -1.18 q < 0.756  | -1.32 q < 0.101  | -1.19 q < 0.381  | -1.19 q < 1      | -1.2 q < 0.698   |
| C6orf98   | spectrin repeat containing, nuclear envelope 1                              | Ssc.6365.1.A1_at    | -1.24 q < 0.000141  | -1.15 q < 1      | -1.3 q < 0.208   | -1.37 q < 0.0527 | -1.39 q < 0.0955 | -1.01 q < 1      |
| NASP      | nuclear autoantigenic sperm protein (histone-binding)                       | Ssc.7153.1.A1_at    | -1.19 q < 0.000144  | -1.07 q < 1      | -1.3 q < 0.0681  | -1.17 q < 0.344  | -1.19 q < 0.899  | -1.22 q < 0.402  |
| NASP      | nuclear autoantigenic sperm protein (histone-binding)                       | Ssc.25115.1.A1_at   | 1.13 q < 0.0765     | 1.47 q < 0.0162  | -1.01 q < 0.996  | 1.1 q < 0.691    | 1.1 q < 1        | 1.05 q < 1       |
| ANKFY1    | ankyrin repeat and FYVE domain containing 1                                 | Ssc.5685.1.S1_at    | -1.2 q < 0.00015    | -1.15 q < 0.901  | -1.32 q < 0.0714 | -1.13 q < 0.545  | -1.19 q < 1      | -1.23 q < 0.401  |
| SLC25A33  | solute carrier family 25, member 33                                         | Ssc.23233.1.S1_a_at | 1.27 q < 0.00015    | 1.24 q < 0.727   | 1.24 q < 0.556   | 1.33 q < 0.176   | 1.3 q < 0.73     | 1.26 q < 0.665   |
| RFK       | riboflavin kinase                                                           | Ssc.7099.2.A1_a_at  | 1.31 q < 0.000156   | -1.02 q < 1      | 1.5 q < 0.0709   | 1.49 q < 0.0615  | 1.41 q < 0.396   | 1.25 q < 0.917   |
| RFK       | riboflavin kinase                                                           | Ssc.7099.1.S1_at    | 1.21 q < 0.0269     | 1.06 q < 1       | 1.14 q < 0.891   | 1.37 q < 0.225   | 1.28 q < 1       | 1.25 q < 0.998   |
| TSC1      | tuberous sclerosis 1                                                        | Ssc.30016.3.A1_at   | 1.17 q < 0.000181   | 1.19 q < 0.489   | 1.16 q < 0.515   | 1.22 q < 0.151   | 1.13 q < 1       | 1.18 q < 0.621   |
| SFXN4     | sideroflexin 4                                                              | Ssc.3798.1.A1_at    | -1.22 q < 0.00019   | -1.13 q < 1      | -1.23 q < 0.443  | -1.35 q < 0.0599 | -1.22 q < 1      | -1.21 q < 0.717  |
| ZFP64     | zinc finger protein 64 homolog (mouse)                                      | Ssc.23811.2.S1_at   | 1.19 q < 0.00019    | 1.16 q < 0.812   | 1.25 q < 0.187   | 1.18 q < 0.343   | 1.08 q < 1       | 1.3 q < 0.0998   |
| MEIS2     | Meis homeobox 2                                                             | Ssc.23820.1.A1_a_at | -1.17 q < 0.0002    | -1.24 q < 0.188  | -1.17 q < 0.484  | -1.17 q < 0.317  | -1.25 q < 0.252  | -1.05 q < 1      |
| MEIS2     | Meis homeobox 2                                                             | Ssc.10110.1.A1_at   | -1.19 q < 0.012     | -1.05 q < 1      | -1.35 q < 0.196  | -1.36 q < 0.125  | -1.18 q < 1      | -1.05 q < 1      |
| WDR68     | DDB1 and CUL4 associated factor 7                                           | Ssc.24219.1.S1_at   | -1.22 q < 0.000203  | -1.07 q < 1      | -1.37 q < 0.0522 | -1.19 q < 0.384  | -1.28 q < 0.434  | -1.2 q < 0.771   |
| PTPMT1    | protein tyrosine phosphatase, mitochondrial 1                               | Ssc.9174.2.A1_a_at  | 1.26 q < 0.000207   | 1.19 q < 0.906   | 1.37 q < 0.143   | 1.37 q < 0.0989  | 1.28 q < 0.844   | 1.11 q < 1       |
| COL4A2    | collagen, type IV, alpha 2                                                  | Ssc.9939.1.A1_at    | -1.66 q < 0.000208  | -1.65 q < 0.605  | -1.98 q < 0.155  | -1.31 q < 0.639  | -1.77 q < 0.696  | -1.68 q < 0.613  |
| ABCF1     | ATP-binding cassette, sub-family F (GCN20), member 1                        | Ssc.1504.2.S1_at    | -1.23 q < 0.000241  | -1.19 q < 0.848  | -1.34 q < 0.134  | -1.17 q < 0.497  | -1.23 q < 1      | -1.25 q < 0.544  |
| SIPA1L1   | signal-induced proliferation-associated 1 like 1                            | Ssc.24345.1.S1_at   | 1.23 q < 0.000244   | 1.2 q < 0.787    | 1.14 q < 0.806   | 1.32 q < 0.126   | 1.32 q < 0.354   | 1.19 q < 0.901   |
| PKP2      | plakophilin 2                                                               | Ssc.7352.1.S1_at    | -1.25 q < 0.000245  | -1.29 q < 0.382  | -1.19 q < 0.68   | -1.2 q < 0.418   | -1.32 q < 0.454  | -1.24 q < 0.728  |
| PKP2      | plakophilin 2                                                               | Ssc.10743.1.A1_at   | -1.33 q < 0.00275   | -1.13 q < 1      | -1.14 q < 0.913  | -1.55 q < 0.133  | -1.38 q < 1      | -1.55 q < 0.257  |
| MORN4     | MORN repeat containing 4                                                    | Ssc.2958.1.S1_at    | -1.17 q < 0.000247  | -1.11 q < 1      | -1.21 q < 0.26   | -1.19 q < 0.249  | -1.25 q < 0.216  | -1.09 q < 1      |
| DIAPH2    | diaphanous homolog 2 (Drosophila)                                           | Ssc.14280.1.S1_at   | -1.2 q < 0.000255   | -1.23 q < 0.458  | -1.3 q < 0.132   | -1.14 q < 0.521  | -1.28 q < 0.351  | -1.09 q < 1      |
| DIAPH2    | diaphanous homolog 2 (Drosophila)                                           | Ssc.24473.1.A1_at   | -1.11 q < 0.0438    | -1.14 q < 0.901  | -1.15 q < 0.623  | -1.15 q < 0.432  | -1.07 q < 1      | -1.07 q < 1      |

| Gene Name | Gene Description                                                                  | Probe Set ID        | Breed MS-WC        | Day 25 MS-WC    | Day 45 MS-WC     | Day 65 MS-WC    | Day 85 MS-WC    | Day 105 MS-WC   |
|-----------|-----------------------------------------------------------------------------------|---------------------|--------------------|-----------------|------------------|-----------------|-----------------|-----------------|
| MAPT      | microtubule-associated protein tau                                                | Ssc.4282.1.S1_at    | -1.33 q < 0.000261 | -1.54 q < 0.104 | -1.48 q < 0.144  | -1.13 q < 0.704 | -1.18 q < 1     | -1.35 q < 0.56  |
| ICOSLG    | inducible T-cell co-stimulator ligand                                             | Ssc.11718.1.S1_at   | -1.31 q < 0.000262 | -1.07 q < 1     | -1.54 q < 0.0588 | -1.34 q < 0.253 | -1.32 q < 0.927 | -1.32 q < 0.596 |
| KIF21B    | kinesin family member 21B                                                         | Ssc.8424.1.A1_at    | -1.27 q < 0.000284 | -1.39 q < 0.18  | -1.15 q < 0.829  | -1.32 q < 0.199 | -1.18 q < 1     | -1.32 q < 0.434 |
| SEC16B    | SEC16 homolog B (S. cerevisiae)                                                   | Ssc.2554.1.S1_at    | -1.31 q < 0.000284 | -1.32 q < 0.547 | -1.28 q < 0.552  | -1.3 q < 0.334  | -1.21 q < 1     | -1.45 q < 0.19  |
| SNRPN     | small nuclear ribonucleoprotein polypeptide N                                     | Ssc.26460.1.A1_at   | 1.22 q < 0.000294  | 1.24 q < 0.512  | 1.07 q < 0.92    | 1.28 q < 0.166  | 1.22 q < 1      | 1.3 q < 0.241   |
| SNRPN     | small nuclear ribonucleoprotein polypeptide N                                     | Ssc.3875.1.S1_a_at  | 1.2 q < 0.000755   | 1.16 q < 0.897  | 1.04 q < 0.963   | 1.24 q < 0.233  | 1.23 q < 0.799  | 1.34 q < 0.0983 |
| SNRPN     | small nuclear ribonucleoprotein polypeptide N                                     | Ssc.3875.2.A1_at    | 1.17 q < 0.00226   | 1.14 q < 0.968  | -1.01 q < 0.99   | 1.3 q < 0.0815  | 1.18 q < 1      | 1.28 q < 0.197  |
| FBXW11    | F-box and WD repeat domain containing 11                                          | Ssc.12819.1.A1_at   | 1.18 q < 0.000311  | 1.28 q < 0.134  | 1.23 q < 0.249   | 1.23 q < 0.164  | 1.13 q < 1      | 1.05 q < 1      |
| INPP5F    | inositol polyphosphate-5-phosphatase F                                            | Ssc.17070.1.A1_s_at | -1.19 q < 0.000355 | -1.18 q < 0.679 | -1.14 q < 0.736  | -1.21 q < 0.25  | -1.21 q < 0.769 | -1.2 q < 0.577  |
| EAPP      | E2F-associated phosphoprotein                                                     | Ssc.23226.1.S1_at   | -1.26 q < 0.000356 | -1.22 q < 0.796 | -1.33 q < 0.257  | -1.13 q < 0.647 | -1.22 q < 1     | -1.4 q < 0.13   |
| DNAJA2    | DnaJ (Hsp40) homolog, subfamily A, member 2                                       | Ssc.1752.1.S1_at    | 1.28 q < 0.000419  | 1.44 q < 0.128  | 1.1 q < 0.913    | 1.31 q < 0.265  | 1.4 q < 0.361   | 1.17 q < 1      |
| MYLE      | Dexi homolog (mouse)                                                              | Ssc.28510.1.S1_at   | -1.16 q < 0.000431 | -1.17 q < 0.557 | -1.26 q < 0.0711 | -1.12 q < 0.474 | -1.2 q < 0.522  | -1.04 q < 1     |
| RCN3      | reticulocalbin 3, EF-hand calcium binding domain                                  | Ssc.24393.1.S1_at   | -1.36 q < 0.000433 | -1.63 q < 0.104 | -1.41 q < 0.384  | -1.37 q < 0.323 | -1.04 q < 1     | -1.44 q < 0.428 |
| ZSCAN29   | zinc finger and SCAN domain containing 29                                         | Ssc.5058.1.A1_at    | 1.2 q < 0.000433   | 1.16 q < 0.913  | 1.19 q < 0.56    | 1.34 q < 0.0568 | 1.17 q < 1      | 1.17 q < 0.937  |
| CKAP4     | cytoskeleton-associated protein 4                                                 | Ssc.2147.2.A1_at    | -1.37 q < 0.000436 | -1.62 q < 0.128 | -1.52 q < 0.212  | -1.11 q < 0.794 | -1.34 q < 1     | -1.34 q < 0.845 |
| CKAP4     | cytoskeleton-associated protein 4                                                 | Ssc.2147.1.A1_at    | -1.24 q < 0.0108   | -1.13 q < 1     | -1.26 q < 0.635  | -1.29 q < 0.382 | -1.09 q < 1     | -1.47 q < 0.202 |
| HNRNPR    | heterogeneous nuclear ribonucleoprotein R                                         | Ssc.7683.1.A1_at    | -1.18 q < 0.00045  | -1.09 q < 1     | -1.28 q < 0.11   | -1.16 q < 0.409 | -1.16 q < 1     | -1.22 q < 0.422 |
| DMRT1     | doublesex and mab-3 related transcription factor 1                                | Ssc.4503.1.A1_at    | -1.45 q < 0.000465 | -1.42 q < 0.733 | -1.52 q < 0.387  | -1.56 q < 0.211 | -1.36 q < 1     | -1.42 q < 0.816 |
| HSD17B10  | hydroxysteroid (17-beta) dehydrogenase 10                                         | Ssc.1301.1.S1_at    | 1.29 q < 0.000469  | 1.25 q < 0.795  | 1.15 q < 0.854   | 1.47 q < 0.0723 | 1.4 q < 0.449   | 1.19 q < 1      |
| TMEM219   | transmembrane protein 219                                                         | Ssc.11229.1.S1_at   | -1.17 q < 0.000521 | -1.08 q < 1     | -1.3 q < 0.0682  | -1.12 q < 0.528 | -1.14 q < 1     | -1.24 q < 0.279 |
| TMEM59    | transmembrane protein 59                                                          | Ssc.9592.1.A1_at    | -1.31 q < 0.000527 | -1.41 q < 0.315 | -1.54 q < 0.0703 | -1.03 q < 0.945 | -1.34 q < 0.863 | -1.26 q < 0.919 |
| OPALIN    | oligodendrocytic myelin paranodal and inner loop protein                          | Ssc.3497.1.A1_at    | -1.16 q < 0.000535 | -1.15 q < 0.732 | -1.09 q < 0.856  | -1.14 q < 0.436 | -1.27 q < 0.163 | -1.17 q < 0.651 |
| CCDC144B  | coiled-coil domain containing 144B                                                | Ssc.1902.1.A1_at    | -1.34 q < 0.000571 | -1.48 q < 0.258 | -1.56 q < 0.11   | -1.48 q < 0.144 | -1.07 q < 1     | -1.18 q < 1     |
| LRRC58    | leucine rich repeat containing 58                                                 | Ssc.12280.1.A1_at   | 1.16 q < 0.0006    | 1.11 q < 1      | 1.16 q < 0.524   | 1.26 q < 0.079  | 1.17 q < 1      | 1.12 q < 1      |
| MEST      | mesoderm specific transcript homolog (mouse)                                      | Ssc.6883.1.A1_at    | -1.44 q < 0.000629 | -1.42 q < 0.735 | -1.44 q < 0.524  | -1.57 q < 0.207 | -1.21 q < 1     | -1.62 q < 0.319 |
| TRIM2     | tripartite motif-containing 2                                                     | Ssc.7210.1.A1_at    | 1.2 q < 0.000634   | 1.24 q < 0.384  | 1.14 q < 0.765   | 1.18 q < 0.382  | 1.09 q < 1      | 1.34 q < 0.0828 |
| TRIM2     | tripartite motif-containing 2                                                     | Ssc.9717.1.A1_at    | 1.16 q < 0.00487   | 1.27 q < 0.263  | 1.16 q < 0.641   | 1.03 q < 0.921  | 1.08 q < 1      | 1.3 q < 0.158   |
| GTF2A1    | general transcription factor IIA, 1, 19/37kDa                                     | Ssc.22615.1.A1_at   | -1.21 q < 0.000638 | -1.33 q < 0.149 | -1.2 q < 0.555   | -1.1 q < 0.681  | -1.29 q < 0.438 | -1.14 q < 1     |
| RNF31     | ring finger protein 31                                                            | Ssc.1625.1.S1_at    | -1.18 q < 0.000638 | -1.2 q < 0.53   | -1.31 q < 0.0641 | -1.22 q < 0.196 | 1.04 q < 1      | -1.22 q < 0.402 |
| PAQR3     | progesterin and adipoQ receptor family member III                                 | Ssc.28652.1.A1_at   | -1.36 q < 0.000665 | -1.26 q < 0.972 | -1.61 q < 0.106  | -1.22 q < 0.584 | -1.29 q < 1     | -1.44 q < 0.456 |
| TATDN1    | TatD DNase domain containing 1                                                    | Ssc.26438.1.S1_at   | -1.18 q < 0.000665 | -1.2 q < 0.522  | -1.23 q < 0.27   | -1.1 q < 0.621  | -1.22 q < 0.688 | -1.14 q < 1     |
| PEX19     | peroxisomal biogenesis factor 19                                                  | Ssc.4292.1.S1_a_at  | -1.22 q < 0.000667 | -1.12 q < 1     | -1.28 q < 0.298  | -1.14 q < 0.579 | -1.19 q < 1     | -1.4 q < 0.0693 |
| ATAD2B    | ATPase family, AAA domain containing 2B                                           | Ssc.30465.1.A1_at   | -1.17 q < 0.000677 | -1.22 q < 0.355 | -1.17 q < 0.515  | -1.07 q < 0.738 | -1.25 q < 0.389 | -1.16 q < 0.871 |
| C9orf19   | GLI pathogenesis-related 2                                                        | Ssc.1850.1.A1_at    | -1.22 q < 0.000711 | -1.36 q < 0.159 | -1.13 q < 0.832  | -1.25 q < 0.273 | -1.05 q < 1     | -1.35 q < 0.158 |
| XPO1      | exportin 1 (CRM1 homolog, yeast)                                                  | Ssc.22357.1.A1_at   | 1.24 q < 0.000729  | 1.25 q < 0.621  | 1.21 q < 0.641   | 1.35 q < 0.128  | 1.15 q < 1      | 1.24 q < 0.731  |
| VMO1      | vitelline membrane outer layer 1 homolog (chicken)                                | Ssc.19013.2.A1_at   | 1.23 q < 0.000737  | 1.26 q < 0.541  | 1.05 q < 0.957   | 1.34 q < 0.127  | 1.29 q < 0.699  | 1.25 q < 0.671  |
| ADAM12    | ADAM metalloproteinase domain 12                                                  | Ssc.1692.1.A1_at    | -1.18 q < 0.000766 | -1.11 q < 1     | -1.3 q < 0.0783  | -1.12 q < 0.548 | -1.2 q < 0.83   | -1.15 q < 0.976 |
| BRP44L    | brain protein 44-like                                                             | Ssc.8972.1.S1_at    | 1.33 q < 0.00077   | 1.48 q < 0.263  | 1.1 q < 0.933    | 1.21 q < 0.584  | 1.61 q < 0.133  | 1.33 q < 0.784  |
| BTF3      | basic transcription factor 3                                                      | Ssc.11125.1.S1_at   | -1.33 q < 0.000781 | -1.05 q < 1     | -1.6 q < 0.074   | -1.29 q < 0.414 | -1.26 q < 1     | -1.51 q < 0.202 |
| BTF3      | butyrophilin, subfamily 3, member A3                                              | Ssc.11125.1.S1_at   | -1.33 q < 0.000781 | -1.05 q < 1     | -1.6 q < 0.074   | -1.29 q < 0.414 | -1.26 q < 1     | -1.51 q < 0.202 |
| ATRX      | alpha thalassemia/mental retardation syndrome X-linked                            | Ssc.24244.2.A1_at   | -1.17 q < 0.000802 | -1.12 q < 1     | -1.22 q < 0.287  | -1.14 q < 0.439 | -1.26 q < 0.263 | -1.1 q < 1      |
| ATRX      | alpha thalassemia/mental retardation syndrome X-linked                            | Ssc.23856.1.A1_at   | -1.16 q < 0.00138  | -1.12 q < 0.993 | -1.16 q < 0.545  | -1.19 q < 0.254 | -1.16 q < 1     | -1.16 q < 0.815 |
| ATRX      | alpha thalassemia/mental retardation syndrome X-linked                            | Ssc.30753.1.S1_at   | -1.18 q < 0.00356  | -1.14 q < 1     | -1.27 q < 0.273  | -1.14 q < 0.545 | -1.19 q < 1     | -1.17 q < 0.984 |
| LCP2      | lymphocyte cytosolic protein 2 (SH2 domain containing leukocyte protein of 76kDa) | Ssc.15565.1.S1_at   | -1.24 q < 0.000814 | -1.14 q < 1     | -1.31 q < 0.282  | -1.17 q < 0.53  | -1.18 q < 1     | -1.41 q < 0.111 |
| RPS20     | ribosomal protein S20                                                             | Ssc.20036.1.S1_at   | -1.14 q < 0.000847 | -1.1 q < 0.995  | -1.21 q < 0.133  | -1.09 q < 0.55  | -1.07 q < 1     | -1.21 q < 0.174 |
| COX7C     | cytochrome c oxidase subunit VIIc                                                 | Ssc.1461.1.S1_at    | 1.34 q < 0.000864  | 1.42 q < 0.441  | 1.1 q < 0.939    | 1.52 q < 0.123  | 1.4 q < 0.848   | 1.3 q < 0.923   |

| Gene Name | Gene Description                                                                                       | Probe Set ID        | Breed MS-WC        | Day 25 MS-WC     | Day 45 MS-WC     | Day 65 MS-WC     | Day 85 MS-WC      | Day 105 MS-WC    |
|-----------|--------------------------------------------------------------------------------------------------------|---------------------|--------------------|------------------|------------------|------------------|-------------------|------------------|
| SERPINE2  | serpin peptidase inhibitor, clade E (nexin, plasminogen activator inhibitor type 1), member 2          | Ssc.16342.1.A1_at   | -1.51 q < 0.000888 | -1.67 q < 0.399  | -1.78 q < 0.193  | -1.84 q < 0.106  | -1.15 q < 1       | -1.25 q < 1      |
| SERPINE2  | serpin peptidase inhibitor, clade E (nexin, plasminogen activator inhibitor type 1), member 2          | Ssc.8736.1.A1_at    | 1.1 q < 0.23       | -1 q < 1         | 1.07 q < 0.93    | 1.39 q < 0.0325  | -1.02 q < 1       | 1.1 q < 1        |
| MRPS2     | mitochondrial ribosomal protein S2                                                                     | Ssc.1787.1.A1_at    | -1.17 q < 0.000917 | -1.11 q < 1      | -1.3 q < 0.0714  | -1.1 q < 0.604   | -1.24 q < 0.42    | -1.1 q < 1       |
| LOH12CR1  | loss of heterozygosity, 12, chromosomal region 1                                                       | Ssc.21514.1.S1_at   | -1.13 q < 0.000932 | -1.07 q < 1      | -1.16 q < 0.354  | -1.11 q < 0.477  | -1.15 q < 0.813   | -1.16 q < 0.456  |
| MMP2      | matrix metalloproteinase 2 (gelatinase A, 72kDa gelatinase, 72kDa type IV collagenase)                 | Ssc.5713.1.S1_at    | -1.42 q < 0.000944 | -1.37 q < 0.829  | -1.48 q < 0.43   | -1.75 q < 0.0706 | -1.13 q < 1       | -1.43 q < 0.731  |
| C13orf31  | chromosome 13 open reading frame 31                                                                    | Ssc.27190.1.S1_at   | 1.15 q < 0.000981  | 1.17 q < 0.567   | 1.15 q < 0.552   | 1.2 q < 0.179    | 1.2 q < 0.567     | 1.04 q < 1       |
| ETF1      | eukaryotic translation termination factor 1                                                            | Ssc.6041.2.A1_at    | -1.26 q < 0.00102  | -1.25 q < 0.783  | -1.27 q < 0.513  | -1.17 q < 0.565  | -1.35 q < 0.559   | -1.26 q < 0.785  |
| C4orf30   | DBB1 and CUL4 associated factor 16                                                                     | Ssc.22469.1.A1_at   | 1.16 q < 0.00103   | 1.2 q < 0.441    | 1.14 q < 0.667   | 1.17 q < 0.332   | 1.11 q < 1        | 1.2 q < 0.493    |
| RNF13     | ring finger protein 13                                                                                 | Ssc.8275.1.A1_at    | -1.32 q < 0.00105  | -1.33 q < 0.671  | -1.27 q < 0.65   | -1.13 q < 0.736  | -1.57 q < 0.173   | -1.32 q < 0.779  |
| GSN       | gelsolin                                                                                               | Ssc.14246.1.S1_at   | -1.37 q < 0.00106  | -1.35 q < 0.785  | -1.28 q < 0.737  | -1.34 q < 0.403  | -1.23 q < 1       | -1.67 q < 0.105  |
| CYP2U1    | cytochrome P450, family 2, subfamily U, polypeptide 1                                                  | Ssc.28083.1.A1_at   | -1.17 q < 0.00108  | -1.15 q < 0.89   | -1.15 q < 0.673  | -1.18 q < 0.35   | -1.25 q < 0.42    | -1.14 q < 1      |
| SLC4A5    | solute carrier family 4, sodium bicarbonate cotransporter, member 5                                    | Ssc.14147.1.A1_at   | -1.28 q < 0.00113  | -1.57 q < 0.0574 | -1.44 q < 0.176  | -1.14 q < 0.669  | -1.17 q < 1       | -1.15 q < 1      |
| SLC4A5    | solute carrier family 4, sodium bicarbonate cotransporter, member 4                                    | Ssc.14147.1.A1_at   | -1.28 q < 0.00113  | -1.57 q < 0.0574 | -1.44 q < 0.176  | -1.14 q < 0.669  | -1.17 q < 1       | -1.15 q < 1      |
| OGFOD1    | 2-oxoglutarate and iron-dependent oxygenase domain containing 1                                        | Ssc.3417.1.A1_at    | -1.14 q < 0.00117  | -1.14 q < 0.671  | -1.14 q < 0.514  | -1.1 q < 0.522   | -1.2 q < 0.415    | -1.1 q < 1       |
| TUFM      | Tu translation elongation factor, mitochondrial                                                        | Ssc.5285.1.S1_at    | -1.21 q < 0.00117  | -1.07 q < 1      | -1.37 q < 0.0874 | -1.15 q < 0.549  | -1.19 q < 1       | -1.3 q < 0.314   |
| CXCL16    | chemokine (C-X-C motif) ligand 16                                                                      | Ssc.6583.1.S1_at    | -1.43 q < 0.00119  | -1.51 q < 0.526  | -1.81 q < 0.0899 | -1.3 q < 0.549   | -1.29 q < 1       | -1.31 q < 1      |
| SERPINF1  | serpin peptidase inhibitor, clade F (alpha-2 antiplasmin, pigment epithelium derived factor), member 1 | Ssc.10451.1.S1_at   | -1.5 q < 0.00123   | -1.44 q < 0.851  | -1.93 q < 0.105  | -1.35 q < 0.546  | -1.07 q < 1       | -1.9 q < 0.139   |
| POLR2I    | polymerase (RNA) II (DNA directed) polypeptide I, 14.5kDa                                              | Ssc.18382.1.S1_at   | -1.18 q < 0.00125  | -1.02 q < 1      | -1.31 q < 0.1    | -1.23 q < 0.226  | -1.23 q < 0.758   | -1.15 q < 1      |
| C2orf79   | chromosome 2 open reading frame 79                                                                     | Ssc.6448.1.S1_at    | 1.2 q < 0.00126    | 1.16 q < 0.951   | 1.19 q < 0.611   | 1.28 q < 0.177   | 1.32 q < 0.302    | 1.07 q < 1       |
| EXT1      | exostosin 1                                                                                            | Ssc.3325.2.S1_a_at  | -1.25 q < 0.00129  | -1.35 q < 0.355  | -1.36 q < 0.256  | -1.21 q < 0.478  | -1.16 q < 1       | -1.2 q < 1       |
| EXT1      | exostosin 1                                                                                            | Ssc.3325.3.S1_at    | -1.17 q < 0.00212  | -1.32 q < 0.315  | -1.29 q < 0.361  | -1.03 q < 0.932  | -1.1 q < 1        | -1.17 q < 1      |
| EXT1      | exostosin 1                                                                                            | Ssc.7562.1.A1_at    | -1.21 q < 0.00277  | -1.44 q < 0.266  | -1.24 q < 0.688  | -1.31 q < 0.344  | -1.11 q < 1       | -1.02 q < 1      |
| CANX      | calnexin                                                                                               | Ssc.21107.1.S1_at   | 1.13 q < 0.0013    | 1.09 q < 1       | 1.15 q < 0.466   | 1.03 q < 0.865   | 1.16 q < 0.813    | 1.25 q < 0.0571  |
| P4HA2     | prolyl 4-hydroxylase, alpha polypeptide II                                                             | Ssc.16984.1.S1_at   | -1.27 q < 0.00131  | -1.39 q < 0.281  | -1.24 q < 0.654  | -1.15 q < 0.638  | -1.23 q < 1       | -1.35 q < 0.456  |
| APOF      | apolipoprotein F                                                                                       | Ssc.23221.1.S1_at   | 1.24 q < 0.00136   | 1.22 q < 0.838   | 1.15 q < 0.831   | 1.3 q < 0.248    | 1.4 q < 0.293     | 1.16 q < 1       |
| C14orf100 | JNK1/MAPK8-associated membrane protein                                                                 | Ssc.5740.1.S1_at    | 1.2 q < 0.00136    | 1.25 q < 0.45    | 1.03 q < 0.976   | 1.28 q < 0.18    | 1.24 q < 0.844    | 1.22 q < 0.687   |
| CYP2D6    | cytochrome P450, family 2, subfamily D, polypeptide 6                                                  | Ssc.4617.1.S1_at    | -1.2 q < 0.00138   | -1.11 q < 1      | -1.09 q < 0.902  | -1.29 q < 0.159  | -1.14 q < 1       | -1.39 q < 0.0504 |
| YKT6      | YKT6 v-SNARE homolog (S. cerevisiae)                                                                   | Ssc.1537.1.S1_at    | -1.21 q < 0.00145  | -1.16 q < 0.996  | -1.35 q < 0.138  | -1.16 q < 0.53   | -1.11 q < 1       | -1.3 q < 0.335   |
| C16orf45  | chromosome 16 open reading frame 45                                                                    | Ssc.26539.1.S1_at   | -1.44 q < 0.00145  | -1.66 q < 0.304  | -1.46 q < 0.526  | -1.1 q < 0.847   | -1.22 q < 1       | -1.9 q < 0.0727  |
| NUDT15    | nudix (nucleoside diphosphate linked moiety X)-type motif 15                                           | Ssc.13453.2.S1_at   | -1.19 q < 0.00146  | -1.08 q < 1      | -1.35 q < 0.0752 | -1.07 q < 0.782  | -1.32 q < 0.227   | -1.16 q < 1      |
| NUDT15    | nudix (nucleoside diphosphate linked moiety X)-type motif 15                                           | Ssc.13453.3.A1_at   | -1.13 q < 0.00323  | 1.01 q < 1       | -1.28 q < 0.153  | 1.04 q < 0.874   | -1.33 q < 0.0993  | -1.13 q < 1      |
| NSF       | N-ethylmaleimide-sensitive factor                                                                      | Ssc.9739.1.A1_at    | -1.19 q < 0.00151  | -1.14 q < 1      | -1.03 q < 0.97   | -1.26 q < 0.188  | -1.34 q < 0.141   | -1.19 q < 0.844  |
| KATNAL2   | katanin p60 subunit A-like 2                                                                           | Ssc.29574.1.A1_at   | 1.22 q < 0.00152   | -1.06 q < 1      | 1.14 q < 0.841   | 1.38 q < 0.0745  | 1.32 q < 0.524    | 1.38 q < 0.133   |
| VEGFB     | vascular endothelial growth factor B                                                                   | Ssc.2095.1.S1_at    | -1.19 q < 0.00153  | -1.18 q < 0.8    | -1.33 q < 0.114  | -1.1 q < 0.689   | -1.21 q < 1       | -1.16 q < 1      |
| HLA-DRB4  | major histocompatibility complex, class II, DR beta 4                                                  | Ssc.210.7.S1_x_at   | 1.34 q < 0.00154   | 1.1 q < 1        | 1.49 q < 0.26    | 1.27 q < 0.495   | 1.75 q < 0.0587   | 1.18 q < 1       |
| HLA-DRB4  | major histocompatibility complex, class II, DR beta 4                                                  | Ssc.16169.1.S1_x_at | -1.22 q < 0.216    | -1.07 q < 1      | 1.04 q < 0.987   | 1.01 q < 0.993   | -2.33 q < 0.00753 | -1.13 q < 1      |
| ZMIZ1     | zinc finger, MIZ-type containing 1                                                                     | Ssc.2259.1.A1_at    | -1.26 q < 0.00159  | -1.3 q < 0.576   | -1.33 q < 0.364  | -1.29 q < 0.317  | -1.25 q < 1       | -1.14 q < 1      |
| TRPS1     | trichorhinophalangeal syndrome I                                                                       | Ssc.30243.1.A1_at   | -1.15 q < 0.00161  | -1.17 q < 0.577  | -1.09 q < 0.842  | -1.19 q < 0.232  | -1.12 q < 1       | -1.18 q < 0.585  |
| C7orf24   | gamma-glutamylcyclotransferase                                                                         | Ssc.19205.1.A1_at   | -1.45 q < 0.00163  | -1.02 q < 1      | -1.67 q < 0.249  | -1.23 q < 0.663  | -1.74 q < 0.37    | -1.76 q < 0.201  |
| C7orf24   | gamma-glutamylcyclotransferase                                                                         | Ssc.19205.2.S1_at   | -1.3 q < 0.00292   | 1.08 q < 1       | -1.51 q < 0.393  | -1.27 q < 0.579  | -1.44 q < 1       | -1.45 q < 0.698  |
| ENTPD4    | ectonucleoside triphosphate diphosphohydrolase 4                                                       | Ssc.8305.1.A1_at    | -1.28 q < 0.00163  | -1.34 q < 0.527  | -1.35 q < 0.4    | 1.01 q < 0.984   | -1.44 q < 0.397   | -1.34 q < 0.567  |
| RBM18     | RNA binding motif protein 18                                                                           | Ssc.9676.1.S1_at    | 1.18 q < 0.00166   | 1.1 q < 1        | 1.3 q < 0.147    | 1.22 q < 0.288   | 1.14 q < 1        | 1.18 q < 0.893   |

| Gene Name | Gene Description                                                                            | Probe Set ID       | Breed MS-WC       | Day 25 MS-WC    | Day 45 MS-WC     | Day 65 MS-WC    | Day 85 MS-WC    | Day 105 MS-WC    |
|-----------|---------------------------------------------------------------------------------------------|--------------------|-------------------|-----------------|------------------|-----------------|-----------------|------------------|
| NCOA5     | nuclear receptor coactivator 5                                                              | Ssc.12924.1.A1_at  | 1.18 q < 0.00166  | 1.1 q < 1       | 1.15 q < 0.738   | 1.28 q < 0.131  | 1.16 q < 1      | 1.24 q < 0.429   |
| ICK       | intestinal cell (MAK-like) kinase                                                           | Ssc.29658.1.A1_at  | -1.18 q < 0.00167 | -1.24 q < 0.408 | -1.16 q < 0.671  | -1.13 q < 0.558 | -1.27 q < 0.495 | -1.13 q < 1      |
| CYB5D2    | cytochrome b5 domain containing 2                                                           | Ssc.2472.1.S1_at   | -1.2 q < 0.00169  | -1.19 q < 0.819 | -1.29 q < 0.232  | -1.17 q < 0.487 | -1.03 q < 1     | -1.35 q < 0.128  |
| HARSL     | histidyl-tRNA synthetase 2, mitochondrial (putative)                                        | Ssc.12954.1.S1_at  | -1.21 q < 0.00174 | -1.12 q < 1     | -1.36 q < 0.125  | -1.09 q < 0.747 | -1.22 q < 1     | -1.28 q < 0.416  |
| DMPK      | dystrophia myotonica-protein kinase                                                         | Ssc.28696.1.S1_at  | -1.22 q < 0.00177 | -1.38 q < 0.152 | -1.39 q < 0.0992 | -1.04 q < 0.883 | -1.1 q < 1      | -1.22 q < 0.855  |
| DSE       | dermatan sulfate epimerase                                                                  | Ssc.29146.1.A1_at  | -1.3 q < 0.00177  | -1.06 q < 1     | -1.52 q < 0.128  | -1.48 q < 0.128 | -1.2 q < 1      | -1.3 q < 0.852   |
| IFT88     | intraflagellar transport 88 homolog (Chlamydomonas)                                         | Ssc.25960.1.S1_at  | -1.16 q < 0.00178 | -1.01 q < 1     | -1.28 q < 0.0933 | -1.01 q < 0.968 | -1.22 q < 0.602 | -1.31 q < 0.053  |
| C21orf100 | non-protein coding RNA 161                                                                  | Ssc.15439.1.A1_at  | -1.27 q < 0.00187 | -1.32 q < 0.557 | -1.12 q < 0.902  | -1.5 q < 0.0643 | -1.16 q < 1     | -1.29 q < 0.774  |
| SLC2A8    | solute carrier family 2 (facilitated glucose transporter), member 8                         | Ssc.12400.1.S1_at  | 1.23 q < 0.00188  | 1.12 q < 1      | 1.32 q < 0.271   | 1.35 q < 0.142  | 1.17 q < 1      | 1.18 q < 1       |
| MTERFD1   | MTERF domain containing 1                                                                   | Ssc.27515.1.S1_at  | 1.19 q < 0.00189  | 1.18 q < 0.867  | 1.14 q < 0.799   | 1.26 q < 0.212  | 1.19 q < 1      | 1.21 q < 0.761   |
| KIAA1598  | KIAA1598                                                                                    | Ssc.8371.1.A1_at   | 1.15 q < 0.00192  | 1.29 q < 0.0541 | 1.04 q < 0.942   | 1.15 q < 0.362  | 1.21 q < 0.558  | 1.05 q < 1       |
| TMED5     | transmembrane emp24 protein transport domain containing 5                                   | Ssc.9167.1.A1_at   | 1.17 q < 0.00192  | 1.16 q < 0.864  | 1.12 q < 0.821   | 1.17 q < 0.396  | 1.22 q < 0.804  | 1.21 q < 0.623   |
| CCDC24    | coiled-coil domain containing 24                                                            | Ssc.1926.1.A1_at   | -1.15 q < 0.00195 | -1.15 q < 0.777 | -1.25 q < 0.142  | 1.03 q < 0.873  | -1.24 q < 0.4   | -1.18 q < 0.623  |
| GPR98     | G protein-coupled receptor 98                                                               | Ssc.30004.1.A1_at  | -1.17 q < 0.00209 | -1.01 q < 1     | -1.23 q < 0.289  | -1.16 q < 0.436 | -1.34 q < 0.081 | -1.13 q < 1      |
| AP1S2     | adaptor-related protein complex 1, sigma 2 subunit                                          | Ssc.4135.2.A1_at   | 1.44 q < 0.0021   | 1.25 q < 1      | 1.61 q < 0.315   | 1.85 q < 0.0683 | 1.23 q < 1      | 1.33 q < 1       |
| AP1S2     | adaptor-related protein complex 1, sigma 2 subunit                                          | Ssc.4135.1.S1_at   | 1.12 q < 0.00573  | -1.01 q < 1     | 1.22 q < 0.124   | 1.22 q < 0.0831 | 1.04 q < 1      | 1.14 q < 0.723   |
| HSPA12A   | heat shock 70kDa protein 12A                                                                | Ssc.14293.1.A1_at  | 1.15 q < 0.00213  | 1.24 q < 0.199  | 1.23 q < 0.168   | 1.24 q < 0.105  | -1.03 q < 1     | 1.08 q < 1       |
| PRKX      | protein kinase, X-linked                                                                    | Ssc.2560.1.S1_at   | 1.26 q < 0.00215  | 1.33 q < 0.485  | 1.28 q < 0.508   | 1.28 q < 0.354  | 1.24 q < 1      | 1.16 q < 1       |
| KCNMA1    | potassium large conductance calcium-activated channel, subfamily M, alpha member 1          | Ssc.8148.2.S1_at   | -1.29 q < 0.00222 | -1.4 q < 0.432  | -1.58 q < 0.0762 | -1.22 q < 0.547 | -1.12 q < 1     | -1.21 q < 1      |
| ISLR      | immunoglobulin superfamily containing leucine-rich repeat                                   | Ssc.1064.1.A1_at   | -1.24 q < 0.00227 | -1.28 q < 0.613 | -1.38 q < 0.192  | -1.27 q < 0.332 | -1.13 q < 1     | -1.16 q < 1      |
| GAS1      | growth arrest-specific 1                                                                    | Ssc.21626.1.A1_at  | -1.38 q < 0.00229 | -1.35 q < 0.85  | -1.76 q < 0.0838 | -1.62 q < 0.14  | -1.16 q < 1     | -1.12 q < 1      |
| GAS1      | growth arrest-specific 1                                                                    | Ssc.21626.2.S1_at  | -1.26 q < 0.0333  | -1.25 q < 1     | -1.51 q < 0.279  | -1.41 q < 0.308 | -1.06 q < 1     | -1.12 q < 1      |
| COL18A1   | collagen, type XVIII, alpha 1                                                               | Ssc.4892.1.S1_at   | -1.28 q < 0.00234 | -1.5 q < 0.153  | -1.56 q < 0.0711 | -1.16 q < 0.645 | -1.28 q < 1     | 1.01 q < 1       |
| C1orf59   | chromosome 1 open reading frame 59                                                          | Ssc.14081.1.A1_at  | -1.38 q < 0.00234 | -1.13 q < 1     | -1.63 q < 0.182  | -1.52 q < 0.223 | -1.21 q < 1     | -1.48 q < 0.58   |
| PRKG1     | protein kinase, cGMP-dependent, type I                                                      | Ssc.26918.1.A1_at  | 1.14 q < 0.00236  | 1.07 q < 1      | 1.11 q < 0.766   | 1.17 q < 0.276  | 1.09 q < 1      | 1.28 q < 0.0605  |
| ZMYND8    | zinc finger, MYND-type containing 8                                                         | Ssc.5447.1.A1_at   | -1.16 q < 0.00245 | -1.01 q < 1     | -1.3 q < 0.0621  | -1.1 q < 0.626  | -1.19 q < 0.907 | -1.2 q < 0.536   |
| PDZK1IP1  | PDZK1 interacting protein 1                                                                 | Ssc.1743.1.S1_at   | 1.2 q < 0.00246   | 1.26 q < 0.484  | 1.02 q < 0.984   | 1.11 q < 0.67   | 1.24 q < 1      | 1.42 q < 0.0549  |
| LTV1      | LTV1 homolog (S. cerevisiae)                                                                | Ssc.24930.1.S1_at  | -1.21 q < 0.00249 | -1.18 q < 0.919 | -1.24 q < 0.481  | -1.17 q < 0.5   | -1.17 q < 1     | -1.28 q < 0.473  |
| RPS8      | ribosomal protein S8                                                                        | Ssc.12202.1.A1_at  | -1.09 q < 0.00255 | -1.01 q < 1     | -1.1 q < 0.494   | -1.11 q < 0.223 | -1.06 q < 1     | -1.15 q < 0.0951 |
| TOB2      | transducer of ERBB2, 2                                                                      | Ssc.2933.1.S1_at   | -1.24 q < 0.00256 | -1.36 q < 0.32  | -1.5 q < 0.0521  | -1.12 q < 0.696 | -1.16 q < 1     | -1.11 q < 1      |
| FYN       | FYN oncogene related to SRC, FGR, YES                                                       | Ssc.2714.1.S1_a_at | -1.23 q < 0.00272 | -1.05 q < 1     | -1.33 q < 0.297  | -1.37 q < 0.131 | -1.15 q < 1     | -1.28 q < 0.643  |
| F3        | coagulation factor III (thromboplastin, tissue factor)                                      | Ssc.19907.1.S1_at  | -1.43 q < 0.00277 | -1.58 q < 0.454 | -1.73 q < 0.186  | -1.11 q < 0.841 | -1.55 q < 0.868 | -1.25 q < 1      |
| F3        | contactin 1                                                                                 | Ssc.19907.1.S1_at  | -1.43 q < 0.00277 | -1.58 q < 0.454 | -1.73 q < 0.186  | -1.11 q < 0.841 | -1.55 q < 0.868 | -1.25 q < 1      |
| KCMF1     | potassium channel modulatory factor 1                                                       | Ssc.25963.1.A1_at  | 1.19 q < 0.00286  | 1.22 q < 0.66   | 1.14 q < 0.789   | 1.25 q < 0.267  | 1.11 q < 1      | 1.25 q < 0.544   |
| SLC25A5   | solute carrier family 25 (mitochondrial carrier; adenine nucleotide translocator), member 5 | Ssc.5999.1.A1_at   | 1.32 q < 0.00287  | 1.48 q < 0.351  | 1.02 q < 0.99    | 1.62 q < 0.0716 | 1.5 q < 0.495   | 1.1 q < 1        |
| RABEPK    | Rab9 effector protein with kelch motifs                                                     | Ssc.30706.1.A1_at  | -1.21 q < 0.00295 | -1.08 q < 1     | -1.41 q < 0.0716 | -1.14 q < 0.593 | -1.23 q < 1     | -1.21 q < 0.912  |
| SLC25A23  | solute carrier family 25 (mitochondrial carrier; phosphate carrier), member 23              | Ssc.17440.1.S1_at  | -1.19 q < 0.00301 | -1.29 q < 0.351 | -1.18 q < 0.677  | -1.13 q < 0.59  | -1.29 q < 0.524 | -1.1 q < 1       |
| FBLN1     | fibulin 1                                                                                   | Ssc.20870.1.S1_at  | -1.39 q < 0.00312 | -1.79 q < 0.107 | -1.35 q < 0.677  | -1.67 q < 0.123 | -1.08 q < 1     | -1.18 q < 1      |
| LY96      | lymphocyte antigen 96                                                                       | Ssc.25550.1.S1_at  | -1.23 q < 0.00312 | -1.3 q < 0.487  | -1.07 q < 0.943  | -1.2 q < 0.474  | -1.13 q < 1     | -1.48 q < 0.0597 |
| KIAA1949  | KIAA1949                                                                                    | Ssc.29821.1.A1_at  | -1.15 q < 0.00315 | -1.17 q < 0.68  | -1.2 q < 0.409   | -1.03 q < 0.912 | -1.13 q < 1     | -1.26 q < 0.205  |
| TMEM106A  | transmembrane protein 106A                                                                  | Ssc.9906.2.A1_at   | -1.16 q < 0.00316 | -1.12 q < 1     | -1.16 q < 0.641  | -1.1 q < 0.626  | -1.26 q < 0.423 | -1.18 q < 0.747  |
| DNAH11    | dynein, axonemal, heavy chain 11                                                            | Ssc.29936.1.A1_at  | -1.19 q < 0.00325 | -1.17 q < 0.899 | -1.22 q < 0.507  | -1.24 q < 0.279 | -1.16 q < 1     | -1.16 q < 1      |
| LYPD6     | LY6/PLAUR domain containing 6                                                               | Ssc.24669.1.A1_at  | 1.29 q < 0.00329  | 1.4 q < 0.441   | 1.32 q < 0.529   | 1.39 q < 0.242  | 1.21 q < 1      | 1.13 q < 1       |
| C6orf162  | chromosome 6 open reading frame 162                                                         | Ssc.17900.1.S1_at  | -1.17 q < 0.0034  | -1.06 q < 1     | -1.21 q < 0.445  | -1.24 q < 0.215 | -1.11 q < 1     | -1.25 q < 0.404  |
| SBF2      | SET binding factor 2                                                                        | Ssc.16986.1.S1_at  | -1.36 q < 0.00346 | -1.07 q < 1     | -1.72 q < 0.0932 | -1.1 q < 0.842  | -1.36 q < 1     | -1.68 q < 0.144  |

| Gene Name | Gene Description                                                                                                             | Probe Set ID        | Breed MS-WC       | Day 25 MS-WC    | Day 45 MS-WC     | Day 65 MS-WC    | Day 85 MS-WC     | Day 105 MS-WC    |
|-----------|------------------------------------------------------------------------------------------------------------------------------|---------------------|-------------------|-----------------|------------------|-----------------|------------------|------------------|
| FRMD6     | FERM domain containing 6                                                                                                     | Ssc.11215.1.S1_at   | -1.29 q < 0.00347 | -1.37 q < 0.527 | -1.35 q < 0.45   | -1.21 q < 0.553 | -1.09 q < 1      | -1.43 q < 0.359  |
| SEMA3E    | sema domain, immunoglobulin domain (Ig), short basic domain, secreted, (semaphorin) 3E                                       | Ssc.17824.1.A1_at   | -1.22 q < 0.00347 | -1.41 q < 0.146 | -1.26 q < 0.498  | -1.35 q < 0.149 | -1.28 q < 0.899  | 1.13 q < 1       |
| SEMA3E    | sema domain, immunoglobulin domain (Ig), short basic domain, secreted, (semaphorin) 3E                                       | Ssc.17824.2.A1_at   | -1.19 q < 0.00832 | -1.21 q < 0.809 | -1.4 q < 0.0854  | -1.3 q < 0.198  | -1.15 q < 1      | 1.06 q < 1       |
| MAN2A2    | mannosidase, alpha, class 2A, member 2                                                                                       | Ssc.1529.1.A1_at    | -1.33 q < 0.0035  | -1.42 q < 0.557 | -1.49 q < 0.31   | -1.27 q < 0.528 | -1.38 q < 1      | -1.14 q < 1      |
| CNNM2     | cyclin M2                                                                                                                    | Ssc.1808.1.S1_at    | -1.15 q < 0.0035  | -1.12 q < 1     | -1.28 q < 0.111  | 1 q < 0.991     | -1.12 q < 1      | -1.28 q < 0.128  |
| TNXA      | tenascin XA pseudogene                                                                                                       | Ssc.19638.1.S1_at   | -1.54 q < 0.00363 | -1.33 q < 1     | -1.65 q < 0.494  | -1.42 q < 0.537 | -1.22 q < 1      | -2.27 q < 0.0651 |
| TNXA      | tenascin XA pseudogene                                                                                                       | Ssc.27043.1.A1_at   | 1.19 q < 0.0193   | 1.01 q < 1      | 1.12 q < 0.885   | 1.32 q < 0.212  | 1.24 q < 1       | 1.29 q < 0.596   |
| ABO       | ABO blood group (transferase A, alpha 1-3-N-acetylgalactosaminyltransferase; transferase B, alpha 1-3-galactosyltransferase) | Ssc.17029.1.A1_at   | -1.19 q < 0.00368 | -1.03 q < 1     | -1.38 q < 0.0758 | -1.19 q < 0.43  | -1.12 q < 1      | -1.28 q < 0.394  |
| RNF38     | ring finger protein 38                                                                                                       | Ssc.30608.1.A1_at   | -1.2 q < 0.00369  | -1.24 q < 0.667 | -1.42 q < 0.0676 | -1.09 q < 0.755 | -1.19 q < 1      | -1.12 q < 1      |
| NFKBIA    | nuclear factor of kappa light polypeptide gene enhancer in B-cells inhibitor, alpha                                          | Ssc.4759.1.S1_at    | -1.16 q < 0.00381 | -1.09 q < 1     | -1.24 q < 0.274  | -1.05 q < 0.827 | -1.21 q < 0.884  | -1.24 q < 0.42   |
| CDH2      | cadherin 2, type 1, N-cadherin (neuronal)                                                                                    | Ssc.31099.1.A1_at   | 1.14 q < 0.00398  | 1.11 q < 1      | 1.09 q < 0.861   | 1.16 q < 0.35   | 1.09 q < 1       | 1.27 q < 0.113   |
| LPHN2     | latrophilin 2                                                                                                                | Ssc.15595.1.S1_at   | 1.14 q < 0.00406  | 1.19 q < 0.432  | 1.06 q < 0.913   | 1.17 q < 0.322  | 1.17 q < 1       | 1.11 q < 1       |
| NKTR      | natural killer-tumor recognition sequence                                                                                    | Ssc.30611.1.A1_at   | 1.17 q < 0.00406  | 1.14 q < 1      | 1.07 q < 0.913   | 1.28 q < 0.124  | 1.14 q < 1       | 1.21 q < 0.608   |
| C2orf34   | chromosome 2 open reading frame 34                                                                                           | Ssc.13318.1.A1_at   | 1.16 q < 0.00407  | 1.15 q < 0.849  | 1.09 q < 0.878   | 1.18 q < 0.345  | 1.11 q < 1       | 1.25 q < 0.257   |
| IL3RA     | interleukin 3 receptor, alpha (low affinity)                                                                                 | Ssc.29769.1.A1_at   | 1.19 q < 0.0041   | 1.16 q < 1      | 1.07 q < 0.936   | 1.17 q < 0.503  | 1.22 q < 1       | 1.38 q < 0.103   |
| PLD3      | phospholipase D family, member 3                                                                                             | Ssc.2571.1.S1_at    | -1.3 q < 0.00417  | -1.44 q < 0.382 | -1.49 q < 0.216  | -1.13 q < 0.739 | -1.27 q < 1      | -1.18 q < 1      |
| SUSD1     | sushi domain containing 1                                                                                                    | Ssc.24293.1.A1_a_at | -1.16 q < 0.00417 | -1.18 q < 0.679 | -1.12 q < 0.783  | -1.15 q < 0.469 | -1.18 q < 1      | -1.16 q < 0.909  |
| MRPL44    | mitochondrial ribosomal protein L44                                                                                          | Ssc.11581.1.S1_at   | -1.21 q < 0.00422 | -1.2 q < 0.897  | -1.31 q < 0.31   | -1.01 q < 0.987 | -1.24 q < 1      | -1.34 q < 0.296  |
| INTS3     | integrator complex subunit 3                                                                                                 | Ssc.2238.1.S1_at    | -1.18 q < 0.00427 | -1.17 q < 0.91  | -1.32 q < 0.145  | -1.05 q < 0.845 | -1.28 q < 0.542  | -1.11 q < 1      |
| INTS3     | integrator complex subunit 3                                                                                                 | Ssc.13701.1.S1_at   | -1.13 q < 0.0325  | -1.09 q < 1     | -1.28 q < 0.142  | -1.06 q < 0.805 | -1.16 q < 1      | -1.06 q < 1      |
| PACSLIN2  | protein kinase C and casein kinase substrate in neurons 2                                                                    | Ssc.16537.1.S1_at   | 1.21 q < 0.00433  | 1.1 q < 1       | 1.04 q < 0.968   | 1.41 q < 0.0658 | 1.12 q < 1       | 1.43 q < 0.0741  |
| CUTA      | cutA divalent cation tolerance homolog (E. coli)                                                                             | Ssc.3128.2.S1_at    | -1.27 q < 0.00455 | -1.22 q < 1     | -1.5 q < 0.147   | -1.29 q < 0.404 | -1.11 q < 1      | -1.28 q < 0.921  |
| CCNA1     | cyclin A1                                                                                                                    | Ssc.24262.1.A1_at   | -1.35 q < 0.00461 | -1.04 q < 1     | -1.58 q < 0.227  | -1.23 q < 0.612 | -1.51 q < 0.743  | -1.47 q < 0.58   |
| SLC2A5    | solute carrier family 2 (facilitated glucose/fructose transporter), member 5                                                 | Ssc.16926.1.S1_at   | 1.67 q < 0.00464  | 1.2 q < 1       | 1.96 q < 0.4     | 2.36 q < 0.109  | 1.46 q < 1       | 1.63 q < 1       |
| DONSON    | downstream neighbor of SON                                                                                                   | Ssc.26428.1.S1_at   | 1.18 q < 0.00468  | 1.23 q < 0.607  | 1.11 q < 0.872   | 1.27 q < 0.208  | 1.29 q < 0.495   | 1.04 q < 1       |
| RNF7      | ring finger protein 7                                                                                                        | Ssc.18436.3.A1_a_at | -1.22 q < 0.0047  | -1.33 q < 0.36  | -1.48 q < 0.0574 | -1.18 q < 0.524 | -1.07 q < 1      | -1.09 q < 1      |
| CXCL14    | chemokine (C-X-C motif) ligand 14                                                                                            | Ssc.20578.1.S1_at   | -1.39 q < 0.00471 | 1.06 q < 1      | -1.63 q < 0.251  | 1.06 q < 0.919  | -1.88 q < 0.117  | -1.88 q < 0.0714 |
| CXCL14    | chemokine (C-X-C motif) ligand 14                                                                                            | Ssc.4984.1.S1_at    | -1.46 q < 0.0278  | 1.3 q < 1       | -2.04 q < 0.196  | 1.15 q < 0.842  | -2.31 q < 0.156  | -2.1 q < 0.206   |
| C6orf145  | chromosome 6 open reading frame 145                                                                                          | Ssc.15664.1.S1_at   | -1.27 q < 0.00473 | -1.32 q < 0.652 | -1.36 q < 0.406  | -1 q < 0.998    | -1.31 q < 1      | -1.39 q < 0.44   |
| HERC1     | hect (homologous to the E6-AP (UBE3A) carboxyl terminus) domain and RCC1 (CHC1)-like domain (RLD) 1                          | Ssc.6629.1.S1_at    | -1.16 q < 0.00478 | -1.01 q < 1     | -1.29 q < 0.129  | -1.14 q < 0.512 | -1.26 q < 0.411  | -1.12 q < 1      |
| Q96EJ7    | -                                                                                                                            | Ssc.15958.1.S1_at   | 1.23 q < 0.00478  | 1.17 q < 1      | 1.23 q < 0.658   | 1.42 q < 0.102  | 1.24 q < 1       | 1.13 q < 1       |
| TUSC3     | tumor suppressor candidate 3                                                                                                 | Ssc.6817.1.A1_a_at  | 1.4 q < 0.00478   | 1.33 q < 1      | 1.27 q < 0.842   | 1.72 q < 0.131  | 1.16 q < 1       | 1.6 q < 0.433    |
| APOBEC4   | apolipoprotein B mRNA editing enzyme, catalytic polypeptide-like 4 (putative)                                                | Ssc.4154.1.A1_at    | -1.15 q < 0.00486 | -1.23 q < 0.36  | -1.19 q < 0.459  | -1.06 q < 0.761 | -1.13 q < 1      | -1.15 q < 0.936  |
| CHCHD8    | coiled-coil-helix-coiled-coil-helix domain containing 8                                                                      | Ssc.12501.1.S1_at   | 1.15 q < 0.00486  | 1.18 q < 0.628  | 1.06 q < 0.918   | 1.19 q < 0.304  | 1.18 q < 1       | 1.14 q < 1       |
| ACBD6     | acyl-CoA binding domain containing 6                                                                                         | Ssc.12913.1.A1_at   | -1.14 q < 0.00487 | -1.14 q < 0.851 | -1.23 q < 0.216  | -1.19 q < 0.251 | -1.14 q < 1      | -1.01 q < 1      |
| EGLN1     | egl nine homolog 1 (C. elegans)                                                                                              | Ssc.5854.1.S1_at    | 1.2 q < 0.00487   | 1.14 q < 1      | 1.06 q < 0.943   | 1.3 q < 0.197   | 1.18 q < 1       | 1.32 q < 0.283   |
| CD44      | CD44 molecule (Indian blood group)                                                                                           | Ssc.15556.1.S1_at   | 1.43 q < 0.00494  | 1.91 q < 0.118  | 1.14 q < 0.936   | 1.76 q < 0.138  | 1.25 q < 1       | 1.24 q < 1       |
| RHOBTB1   | Rho-related BTB domain containing 1                                                                                          | Ssc.18959.1.A1_at   | 1.16 q < 0.00497  | 1.11 q < 1      | 1.02 q < 0.981   | 1.31 q < 0.0594 | 1.04 q < 1       | 1.33 q < 0.0572  |
| ABC7      | ATP-binding cassette, sub-family B (MDR/TAP), member 7                                                                       | Ssc.21338.1.S1_at   | -1.18 q < 0.00501 | -1.03 q < 1     | -1.32 q < 0.163  | -1 q < 0.992    | -1.42 q < 0.0642 | -1.2 q < 0.864   |
| COPA      | coatamer protein complex, subunit alpha                                                                                      | Ssc.13207.1.A1_at   | -1.21 q < 0.00515 | -1.23 q < 0.773 | -1.36 q < 0.195  | -1.11 q < 0.693 | -1.09 q < 1      | -1.28 q < 0.59   |
| PPP1R3E   | protein phosphatase 1, regulatory (inhibitor) subunit 3E                                                                     | Ssc.6745.2.A1_a_at  | -1.13 q < 0.00518 | -1.01 q < 1     | -1.16 q < 0.493  | -1.11 q < 0.521 | -1.26 q < 0.142  | -1.13 q < 0.984  |
| Q8NHG7    | -                                                                                                                            | Ssc.29609.2.A1_at   | 1.21 q < 0.00518  | 1.03 q < 1      | 1.31 q < 0.32    | 1.43 q < 0.0571 | 1.12 q < 1       | 1.2 q < 0.997    |

| Gene Name  | Gene Description                                                     | Probe Set ID         | Breed MS-WC       | Day 25 MS-WC    | Day 45 MS-WC     | Day 65 MS-WC     | Day 85 MS-WC    | Day 105 MS-WC   |
|------------|----------------------------------------------------------------------|----------------------|-------------------|-----------------|------------------|------------------|-----------------|-----------------|
| PARC       | cullin 9                                                             | Ssc.19484.1.A1_at    | -1.11 q < 0.00521 | -1.12 q < 0.81  | -1.05 q < 0.923  | -1.13 q < 0.379  | -1.2 q < 0.318  | -1.08 q < 1     |
| PARC       | chemokine (C-C motif) ligand 18 (pulmonary and activation-regulated) | Ssc.19484.1.A1_at    | -1.11 q < 0.00521 | -1.12 q < 0.81  | -1.05 q < 0.923  | -1.13 q < 0.379  | -1.2 q < 0.318  | -1.08 q < 1     |
| C4orf27    | chromosome 4 open reading frame 27                                   | Ssc.1956.1.S1_a_at   | -1.16 q < 0.00524 | 1.04 q < 1      | -1.28 q < 0.181  | -1.2 q < 0.325   | -1.17 q < 1     | -1.24 q < 0.42  |
| TAGLN2     | transgelin 2                                                         | Ssc.17300.1.S1_at    | -1.48 q < 0.00528 | -1.25 q < 1     | -1.62 q < 0.47   | -1.47 q < 0.457  | -1.21 q < 1     | -1.98 q < 0.15  |
| ATP6V1D    | ATPase, H+ transporting, lysosomal 34kDa, V1 subunit D               | Ssc.14416.1.A1_at    | -1.31 q < 0.00532 | -1.34 q < 0.787 | -1.36 q < 0.532  | -1.31 q < 0.444  | -1.12 q < 1     | -1.45 q < 0.498 |
| FAM114A2   | family with sequence similarity 114, member A2                       | Ssc.30685.1.A1_at    | 1.22 q < 0.00539  | 1.02 q < 1      | 1.26 q < 0.539   | 1.33 q < 0.223   | 1.27 q < 1      | 1.28 q < 0.681  |
| SERF1B     | small EDRK-rich factor 1B (centromeric)                              | Ssc.25510.1.S1_at    | -1.16 q < 0.00545 | -1.13 q < 1     | -1.24 q < 0.282  | -1.04 q < 0.86   | -1.25 q < 0.469 | -1.13 q < 1     |
| PAIP2      | poly(A) binding protein interacting protein 2                        | Ssc.10336.1.S1_at    | -1.18 q < 0.00547 | -1.08 q < 1     | -1.37 q < 0.0625 | -1.13 q < 0.593  | -1.18 q < 1     | -1.14 q < 1     |
| CCDC115    | coiled-coil domain containing 115                                    | Ssc.4903.1.A1_at     | 1.28 q < 0.00548  | 1.2 q < 1       | 1.29 q < 0.626   | 1.37 q < 0.281   | 1.4 q < 0.758   | 1.15 q < 1      |
| RSRC2      | arginine/serine-rich coiled-coil 2                                   | Ssc.19083.2.A1_at    | 1.15 q < 0.0055   | 1.04 q < 1      | 1.16 q < 0.629   | 1.17 q < 0.376   | 1.21 q < 0.823  | 1.19 q < 0.66   |
| MRPL22     | mitochondrial ribosomal protein L22                                  | Ssc.2756.1.A1_at     | -1.22 q < 0.00558 | -1.18 q < 1     | -1.29 q < 0.412  | -1.24 q < 0.393  | -1.16 q < 1     | -1.21 q < 0.99  |
| FAM111B    | family with sequence similarity 111, member B                        | Ssc.24695.1.A1_at    | -1.14 q < 0.0056  | -1.15 q < 0.741 | -1.11 q < 0.803  | -1.11 q < 0.533  | -1.09 q < 1     | -1.22 q < 0.277 |
| HNRNPC     | heterogeneous nuclear ribonucleoprotein C (C1/C2)                    | Ssc.24754.1.A1_at    | 1.18 q < 0.00563  | 1.31 q < 0.259  | 1.16 q < 0.738   | 1.23 q < 0.327   | 1.11 q < 1      | 1.12 q < 1      |
| COL27A1    | collagen, type XXVII, alpha 1                                        | Ssc.3861.1.S1_at     | -1.14 q < 0.00568 | -1.03 q < 1     | -1.2 q < 0.337   | -1.15 q < 0.395  | -1.18 q < 1     | -1.14 q < 0.929 |
| COP22      | coatamer protein complex, subunit zeta 2                             | Ssc.4221.1.S1_at     | -1.27 q < 0.00571 | -1.17 q < 1     | -1.5 q < 0.136   | -1.11 q < 0.758  | -1.22 q < 1     | -1.36 q < 0.592 |
| GMPR2      | guanosine monophosphate reductase 2                                  | Ssc.11000.1.S1_at    | -1.23 q < 0.00571 | -1.1 q < 1      | -1.45 q < 0.109  | -1.15 q < 0.639  | -1.24 q < 1     | -1.24 q < 0.912 |
| ANXA11     | annexin A11                                                          | Ssc.2918.1.S1_at     | -1.21 q < 0.00572 | -1.17 q < 1     | -1.3 q < 0.384   | -1.19 q < 0.515  | -1.19 q < 1     | -1.22 q < 0.921 |
| GPC6       | glypican 6                                                           | Ssc.2834.1.A1_at     | -1.19 q < 0.00574 | -1.36 q < 0.136 | -1.27 q < 0.342  | -1.22 q < 0.344  | -1.06 q < 1     | -1.05 q < 1     |
| CCDC93     | coiled-coil domain containing 93                                     | Ssc.18505.1.A1_at    | -1.14 q < 0.00604 | -1.13 q < 0.929 | -1.25 q < 0.166  | 1.02 q < 0.935   | -1.19 q < 0.892 | -1.18 q < 0.676 |
| CCDC93     | coiled-coil domain containing 93                                     | Ssc.27636.1.S1_at    | -1.12 q < 0.0261  | -1.22 q < 0.308 | -1.17 q < 0.503  | -1.01 q < 0.962  | -1.15 q < 1     | -1.05 q < 1     |
| DDX19A     | DEAD (Asp-Glu-Ala-As) box polypeptide 19A                            | Ssc.30461.1.A1_at    | -1.16 q < 0.00604 | -1.08 q < 1     | -1 q < 0.997     | -1.29 q < 0.111  | -1.26 q < 0.489 | -1.2 q < 0.676  |
| NCRNA00084 | nuclear paraspeckle assembly transcript 1 (non-protein coding)       | Ssc.10822.1.S1_at    | -1.47 q < 0.00606 | -1.61 q < 0.613 | -1.15 q < 0.94   | -1.12 q < 0.852  | -1.67 q < 0.853 | -2 q < 0.137    |
| PSD4       | pleckstrin and Sec7 domain containing 4                              | Ssc.26669.1.A1_at    | -1.27 q < 0.00607 | -1.4 q < 0.449  | -1.36 q < 0.443  | -1.22 q < 0.553  | -1.41 q < 0.694 | -1.03 q < 1     |
| SAP53      | protein phosphatase 6, regulatory subunit 3                          | Ssc.12021.1.S1_at    | 1.1 q < 0.00611   | 1.11 q < 0.82   | 1 q < 0.997      | 1.11 q < 0.413   | 1.09 q < 1      | 1.21 q < 0.0725 |
| APOOL      | apolipoprotein O-like                                                | Ssc.8779.1.A1_at     | -1.17 q < 0.00613 | -1.06 q < 1     | -1.29 q < 0.187  | -1.14 q < 0.548  | -1.23 q < 0.851 | -1.14 q < 1     |
| CAMLG      | calcium modulating ligand                                            | Ssc.4324.2.A1_at     | -1.15 q < 0.00617 | -1.26 q < 0.227 | -1.22 q < 0.323  | -1.09 q < 0.669  | -1.08 q < 1     | -1.11 q < 1     |
| Q727L8     | -                                                                    | Ssc.17312.1.A1_at    | -1.26 q < 0.00644 | -1.28 q < 0.796 | -1.41 q < 0.287  | -1.37 q < 0.248  | -1.45 q < 0.423 | 1.13 q < 1      |
| B3GNTL1    | UDP-GlcNAc:betaGal beta-1,3-N-acetylglucosaminyltransferase-like 1   | Ssc.19604.1.S1_at    | 1.12 q < 0.00654  | 1.19 q < 0.349  | 1 q < 0.997      | 1.2 q < 0.152    | 1.13 q < 1      | 1.1 q < 1       |
| ZNF652     | zinc finger protein 652                                              | Ssc.30952.1.A1_at    | 1.15 q < 0.00666  | 1.04 q < 1      | 1.15 q < 0.629   | 1.3 q < 0.0603   | 1.12 q < 1      | 1.14 q < 1      |
| CK465633   | -                                                                    | Ssc.20531.1.S1_at    | -1.19 q < 0.00669 | -1.17 q < 0.97  | -1.34 q < 0.149  | -1.22 q < 0.366  | -1.17 q < 1     | -1.05 q < 1     |
| COX7B      | cytochrome c oxidase subunit VIIb                                    | Ssc.986.1.A1_at      | -1.22 q < 0.00676 | -1.17 q < 1     | -1.35 q < 0.269  | -1.24 q < 0.394  | -1.08 q < 1     | -1.26 q < 0.756 |
| GRHL2      | grainyhead-like 2 (Drosophila)                                       | Ssc.18618.1.A1_at    | 1.15 q < 0.00696  | -1.02 q < 1     | 1.28 q < 0.136   | 1.2 q < 0.272    | 1.12 q < 1      | 1.19 q < 0.686  |
| HLA-A      | major histocompatibility complex, class I, A                         | Ssc.13780.9.S1_a_at  | 1.21 q < 0.007    | 1.48 q < 0.0605 | 1.3 q < 0.372    | 1.03 q < 0.932   | -1.08 q < 1     | 1.41 q < 0.131  |
| HLA-A      | major histocompatibility complex, class I, A                         | Ssc.13780.3.S1_at    | 1.14 q < 0.00982  | 1.32 q < 0.0614 | 1.04 q < 0.956   | 1.24 q < 0.156   | 1.1 q < 1       | 1.03 q < 1      |
| HLA-A      | major histocompatibility complex, class I, A                         | Ssc.13780.11.S1_x_at | 1.16 q < 0.766    | 1.06 q < 1      | -1.46 q < 0.842  | 4.21 q < 0.00154 | -1.2 q < 1      | -1.22 q < 1     |
| OXR1       | oxidation resistance 1                                               | Ssc.10917.1.A1_at    | -1.3 q < 0.007    | -1.34 q < 0.767 | -1.35 q < 0.556  | -1.32 q < 0.416  | -1.36 q < 1     | -1.14 q < 1     |
| PDGFC      | platelet derived growth factor C                                     | Ssc.25067.1.S1_at    | -1.25 q < 0.00706 | -1.17 q < 1     | -1.2 q < 0.802   | -1.12 q < 0.744  | -1.39 q < 0.607 | -1.4 q < 0.372  |
| C18orf18   | chromosome 18 open reading frame 18                                  | Ssc.30604.1.S1_at    | -1.13 q < 0.0071  | -1.26 q < 0.138 | -1.16 q < 0.52   | -1.14 q < 0.433  | -1.17 q < 1     | 1.04 q < 1      |
| GPX7       | glutathione peroxidase 7                                             | Ssc.11374.1.S1_at    | -1.21 q < 0.0071  | -1.44 q < 0.114 | -1.43 q < 0.108  | -1.01 q < 0.988  | -1.05 q < 1     | -1.21 q < 1     |
| HLA-C      | major histocompatibility complex, class I, C                         | Ssc.16756.1.S1_at    | -1.2 q < 0.00724  | -1.18 q < 0.985 | -1.3 q < 0.329   | 1.03 q < 0.94    | -1.26 q < 1     | -1.32 q < 0.354 |
| TMEM214    | transmembrane protein 214                                            | Ssc.4888.1.S1_at     | -1.18 q < 0.00726 | -1.29 q < 0.36  | -1.39 q < 0.0788 | 1.03 q < 0.919   | -1.18 q < 1     | -1.14 q < 1     |
| ZRANB2     | zinc finger, RAN-binding domain containing 2                         | Ssc.23838.1.A1_at    | 1.21 q < 0.00752  | -1.02 q < 1     | 1.24 q < 0.579   | 1.24 q < 0.409   | 1.18 q < 1      | 1.49 q < 0.0571 |
| FUNDC1     | FUN14 domain containing 1                                            | Ssc.5383.1.S1_at     | -1.14 q < 0.00753 | -1.07 q < 1     | -1.15 q < 0.617  | -1.08 q < 0.7    | -1.18 q < 0.925 | -1.21 q < 0.41  |
| CAPN9      | calpain 9                                                            | Ssc.9446.1.A1_at     | -1.16 q < 0.00763 | -1.16 q < 0.907 | -1.3 q < 0.133   | -1.17 q < 0.413  | -1.17 q < 1     | -1.02 q < 1     |
| ADAMTS1    | ADAM metalloproteinase with thrombospondin type 1 motif, 1           | Ssc.12365.1.A1_at    | -1.37 q < 0.00791 | -1.73 q < 0.185 | -1.44 q < 0.555  | -1.3 q < 0.557   | -1.39 q < 1     | -1.07 q < 1     |
| ELOVL7     | ELOVL family member 7, elongation of long chain fatty acids (yeast)  | Ssc.17942.1.A1_at    | 1.28 q < 0.00793  | 1.21 q < 1      | 1.54 q < 0.138   | 1.54 q < 0.0981  | -1.07 q < 1     | 1.25 q < 1      |

| Gene Name | Gene Description                                                  | Probe Set ID        | Breed MS-WC       | Day 25 MS-WC     | Day 45 MS-WC     | Day 65 MS-WC    | Day 85 MS-WC     | Day 105 MS-WC   |
|-----------|-------------------------------------------------------------------|---------------------|-------------------|------------------|------------------|-----------------|------------------|-----------------|
| MMS19     | MMS19 nucleotide excision repair homolog ( <i>S. cerevisiae</i> ) | Ssc.27378.1.S1_at   | 1.16 q < 0.00798  | 1.21 q < 0.598   | -1.06 q < 0.935  | 1.33 q < 0.0565 | 1.24 q < 0.688   | 1.11 q < 1      |
| DUT       | deoxyuridine triphosphatase                                       | Ssc.19928.1.S1_a_at | 1.18 q < 0.00804  | 1.35 q < 0.161   | 1.16 q < 0.764   | 1.17 q < 0.486  | 1.21 q < 1       | 1.04 q < 1      |
| DNAH14    | dynein, axonemal, heavy chain 14                                  | Ssc.10174.1.A1_at   | 1.16 q < 0.00806  | -1 q < 1         | 1.11 q < 0.859   | 1.18 q < 0.389  | 1.24 q < 0.67    | 1.29 q < 0.199  |
| DNAH14    | dynein, axonemal, heavy chain 14                                  | Ssc.30965.1.A1_at   | -1.2 q < 0.0213   | -1.3 q < 0.598   | -1.45 q < 0.135  | -1.3 q < 0.323  | -1.03 q < 1      | -1.01 q < 1     |
| DNAH14    | dynein, axonemal, heavy chain 14                                  | Ssc.21309.1.A1_at   | 1.16 q < 0.128    | 1.77 q < 0.00542 | 1.02 q < 0.989   | 1.45 q < 0.131  | -1.2 q < 1       | -1.02 q < 1     |
| SGPL1     | sphingosine-1-phosphate lyase 1                                   | Ssc.7716.1.A1_at    | -1.14 q < 0.0081  | -1.28 q < 0.132  | -1.02 q < 0.983  | -1.14 q < 0.477 | -1.28 q < 0.192  | -1.02 q < 1     |
| SLC25A34  | solute carrier family 25, member 34                               | Ssc.29286.1.A1_at   | 1.12 q < 0.0081   | 1.02 q < 1       | 1.2 q < 0.253    | 1.17 q < 0.281  | 1.16 q < 1       | 1.08 q < 1      |
| KCTD1     | potassium channel tetramerisation domain containing 1             | Ssc.11801.1.A1_at   | -1.16 q < 0.00821 | -1.2 q < 0.671   | -1.29 q < 0.171  | -1.11 q < 0.622 | -1.16 q < 1      | -1.06 q < 1     |
| MCCC2     | methylcrotonoyl-CoA carboxylase 2 (beta)                          | Ssc.27572.1.S1_at   | 1.16 q < 0.00823  | 1.16 q < 0.921   | 1.17 q < 0.641   | 1.26 q < 0.187  | 1.13 q < 1       | 1.11 q < 1      |
| SIAE      | sialic acid acetyltransferase                                     | Ssc.27298.1.A1_at   | -1.18 q < 0.00823 | -1.22 q < 0.677  | -1.21 q < 0.552  | -1.31 q < 0.146 | -1.15 q < 1      | -1.02 q < 1     |
| FASN      | fatty acid synthase                                               | Ssc.18175.1.A1_at   | 1.27 q < 0.00831  | 1.65 q < 0.0577  | -1.12 q < 0.913  | 1.52 q < 0.11   | 1.2 q < 1        | 1.23 q < 1      |
| PAK1      | p21 protein (Cdc42/Rac)-activated kinase 1                        | Ssc.11929.1.A1_at   | -1.12 q < 0.00831 | -1.13 q < 0.812  | -1.23 q < 0.109  | -1.03 q < 0.868 | -1.15 q < 1      | -1.06 q < 1     |
| PAK1      | protein kinase N1                                                 | Ssc.11929.1.A1_at   | -1.12 q < 0.00831 | -1.13 q < 0.812  | -1.23 q < 0.109  | -1.03 q < 0.868 | -1.15 q < 1      | -1.06 q < 1     |
| Q9H7X0    | -                                                                 | Ssc.5727.1.S1_at    | -1.15 q < 0.00832 | -1.14 q < 0.995  | -1.33 q < 0.0695 | -1.04 q < 0.864 | -1.16 q < 1      | -1.12 q < 1     |
| HADH      | hydroxyacyl-CoA dehydrogenase                                     | Ssc.12507.1.S1_at   | -1.22 q < 0.00844 | -1.11 q < 1      | -1.26 q < 0.572  | -1.35 q < 0.217 | -1.2 q < 1       | -1.22 q < 1     |
| GPR37     | G protein-coupled receptor 37 (endothelin receptor type B-like)   | Ssc.27084.1.S1_at   | -1.49 q < 0.00862 | -1.41 q < 1      | -1.88 q < 0.254  | -1.57 q < 0.399 | -1.44 q < 1      | -1.24 q < 1     |
| IGFBP3    | insulin-like growth factor binding protein 3                      | Ssc.15588.1.S2_at   | 1.87 q < 0.00866  | 1.98 q < 0.812   | 2.55 q < 0.31    | 3.26 q < 0.0756 | 1.17 q < 1       | 1.2 q < 1       |
| CPNE4     | copine IV                                                         | Ssc.11953.1.A1_at   | -1.08 q < 0.0089  | -1.08 q < 0.893  | -1.05 q < 0.898  | -1.14 q < 0.162 | -1.08 q < 1      | -1.08 q < 1     |
| C5orf34   | chromosome 5 open reading frame 34                                | Ssc.22208.1.A1_at   | -1.14 q < 0.00896 | -1.21 q < 0.418  | -1.12 q < 0.777  | -1.09 q < 0.667 | -1.21 q < 0.706  | -1.08 q < 1     |
| PDCL      | phosducin-like                                                    | Ssc.5703.1.A1_at    | -1.22 q < 0.00896 | -1.26 q < 0.736  | -1.17 q < 0.819  | -1.15 q < 0.643 | -1.31 q < 0.861  | -1.22 q < 1     |
| GTF3C5    | general transcription factor IIIC, polypeptide 5, 63kDa           | Ssc.17447.1.A1_at   | -1.1 q < 0.00922  | -1.08 q < 1      | -1.12 q < 0.55   | -1.07 q < 0.612 | -1.1 q < 1       | -1.14 q < 0.622 |
| CD28      | CD28 molecule                                                     | Ssc.13463.2.S1_at   | -1.17 q < 0.00925 | -1.03 q < 1      | -1.38 q < 0.0582 | -1.27 q < 0.197 | -1.05 q < 1      | -1.15 q < 1     |
| CD28      | cytotoxic T-lymphocyte-associated protein 4                       | Ssc.13463.2.S1_at   | -1.17 q < 0.00925 | -1.03 q < 1      | -1.38 q < 0.0582 | -1.27 q < 0.197 | -1.05 q < 1      | -1.15 q < 1     |
| PLOD1     | procollagen-lysine 1, 2-oxoglutarate 5-dioxygenase 1              | Ssc.23519.2.S1_at   | -1.26 q < 0.00928 | -1.35 q < 0.598  | -1.57 q < 0.0824 | -1.15 q < 0.685 | -1.06 q < 1      | -1.23 q < 1     |
| RGS11     | regulator of G-protein signaling 11                               | Ssc.5588.1.A1_at    | 1.11 q < 0.00928  | 1.09 q < 1       | 1.05 q < 0.917   | 1.13 q < 0.368  | 1.14 q < 1       | 1.13 q < 0.729  |
| GNPDA1    | glucosamine-6-phosphate deaminase 1                               | Ssc.20238.2.S1_a_at | -1.21 q < 0.00932 | -1.08 q < 1      | -1.47 q < 0.0721 | -1.16 q < 0.585 | -1.11 q < 1      | -1.27 q < 0.728 |
| PSCD1     | cytohesin 1                                                       | Ssc.13662.1.A1_at   | 1.13 q < 0.00938  | 1.07 q < 1       | 1.14 q < 0.647   | 1.12 q < 0.521  | 1.2 q < 0.685    | 1.13 q < 1      |
| STBD1     | starch binding domain 1                                           | Ssc.13948.1.S1_at   | -1.18 q < 0.00944 | -1.13 q < 1      | -1.21 q < 0.583  | -1.21 q < 0.404 | -1.21 q < 1      | -1.16 q < 1     |
| KITLG     | KIT ligand                                                        | Ssc.4707.1.A1_at    | -1.2 q < 0.00949  | -1.05 q < 1      | -1.39 q < 0.15   | -1.13 q < 0.66  | -1.24 q < 1      | -1.23 q < 0.872 |
| PSMG4     | proteasome (prosome, macropain) assembly chaperone 4              | Ssc.15590.1.S1_at   | -1.12 q < 0.0095  | 1.02 q < 1       | -1.2 q < 0.265   | -1.06 q < 0.769 | -1.22 q < 0.415  | -1.18 q < 0.49  |
| QSOX1     | quiescin Q6 sulfhydryl oxidase 1                                  | Ssc.3249.1.S1_at    | -1.33 q < 0.00952 | -1.22 q < 1      | -1.61 q < 0.196  | -1.49 q < 0.251 | -1.18 q < 1      | -1.19 q < 1     |
| COL12A1   | collagen, type XII, alpha 1                                       | Ssc.1049.1.S1_at    | -1.47 q < 0.00973 | -1.26 q < 1      | -1.6 q < 0.522   | -1.54 q < 0.406 | -1.13 q < 1      | -1.95 q < 0.218 |
| C3orf10   | chromosome 3 open reading frame 10                                | Ssc.17314.1.S1_at   | -1.15 q < 0.00988 | 1.02 q < 1       | -1.31 q < 0.0947 | -1.12 q < 0.552 | -1.15 q < 1      | -1.2 q < 0.655  |
| THY1      | Thy-1 cell surface antigen                                        | Ssc.20133.1.A1_at   | 2.02 q < 0.0099   | 1.39 q < 1       | 2.27 q < 0.561   | 3.94 q < 0.0643 | 1.45 q < 1       | 1.84 q < 1      |
| RNF213    | ring finger protein 213                                           | Ssc.30869.1.S1_at   | -1.17 q < 0.00995 | -1.11 q < 1      | -1.33 q < 0.134  | -1.14 q < 0.567 | -1.04 q < 1      | -1.24 q < 0.544 |
| CHD4      | chromodomain helicase DNA binding protein 4                       | Ssc.16672.1.S1_at   | -1.11 q < 0.00998 | -1.06 q < 1      | -1.23 q < 0.103  | -1.13 q < 0.395 | -1.05 q < 1      | -1.11 q < 1     |
| XPO6      | exportin 6                                                        | Ssc.21575.1.S1_at   | -1.15 q < 0.01    | -1.05 q < 1      | -1.28 q < 0.152  | -1.09 q < 0.69  | -1.13 q < 1      | -1.21 q < 0.549 |
| ZFP1      | zinc finger protein 1 homolog (mouse)                             | Ssc.30576.1.A1_at   | 1.13 q < 0.0101   | 1.27 q < 0.0928  | 1.01 q < 0.988   | 1.16 q < 0.346  | 1.1 q < 1        | 1.1 q < 1       |
| TTC7A     | tetratricopeptide repeat domain 7A                                | Ssc.5883.1.S1_at    | -1.13 q < 0.0101  | -1.15 q < 0.786  | -1 q < 0.997     | -1.22 q < 0.179 | -1.11 q < 1      | -1.19 q < 0.515 |
| ITGA2     | integrin, alpha 2 (CD49B, alpha 2 subunit of VLA-2 receptor)      | Ssc.16218.1.S1_at   | 1.2 q < 0.0102    | -1.07 q < 1      | 1.37 q < 0.202   | 1.3 q < 0.264   | 1.2 q < 1        | 1.28 q < 0.623  |
| ITGA2     | integrin, alpha 2 (CD49B, alpha 2 subunit of VLA-2 receptor)      | Ssc.26342.1.A1_at   | 1.04 q < 0.717    | -1.13 q < 1      | -1.04 q < 0.954  | 1.35 q < 0.0242 | 1.1 q < 1        | -1.01 q < 1     |
| ARHGAP28  | Rho GTPase activating protein 28                                  | Ssc.11844.1.A1_at   | 1.16 q < 0.0102   | 1.29 q < 0.257   | 1.26 q < 0.31    | 1.2 q < 0.381   | 1.08 q < 1       | 1.02 q < 1      |
| ARHGAP28  | Rho GTPase activating protein 28                                  | Ssc.30073.1.A1_at   | 1.07 q < 0.423    | -1.04 q < 1      | 1.11 q < 0.843   | 1.32 q < 0.045  | -1.04 q < 1      | 1.03 q < 1      |
| CYP1B1    | cytochrome P450, family 1, subfamily B, polypeptide 1             | Ssc.8767.1.A1_at    | 1.24 q < 0.0104   | 1.15 q < 1       | 1.26 q < 0.632   | 1.52 q < 0.0637 | 1.29 q < 1       | 1.02 q < 1      |
| CABLES2   | Cdk5 and Abl enzyme substrate 2                                   | Ssc.28609.1.S1_at   | 1.25 q < 0.0104   | 1.36 q < 0.515   | 1.35 q < 0.427   | 1.26 q < 0.452  | 1.2 q < 1        | 1.08 q < 1      |
| SCPEP1    | serine carboxypeptidase 1                                         | Ssc.3037.1.S1_at    | -1.59 q < 0.0104  | -1.74 q < 0.725  | -1.38 q < 0.859  | 1.32 q < 0.698  | -2.85 q < 0.0549 | -1.95 q < 0.498 |
| PTN       | pleiotrophin                                                      | Ssc.12975.1.S1_at   | -1.58 q < 0.0104  | -1.6 q < 0.89    | -1.25 q < 0.917  | -1.67 q < 0.41  | -1.24 q < 1      | -2.39 q < 0.132 |

| Gene Name | Gene Description                                                      | Probe Set ID        | Breed MS-WC      | Day 25 MS-WC     | Day 45 MS-WC     | Day 65 MS-WC    | Day 85 MS-WC     | Day 105 MS-WC    |
|-----------|-----------------------------------------------------------------------|---------------------|------------------|------------------|------------------|-----------------|------------------|------------------|
| AQP1      | aquaporin 1 (Colton blood group)                                      | Ssc.27596.1.S1_at   | -1.3 q < 0.0105  | 1.09 q < 1       | -1.52 q < 0.251  | -1.52 q < 0.166 | -1.23 q < 1      | -1.4 q < 0.682   |
| TJP2      | tight junction protein 2 (zona occludens 2)                           | Ssc.23465.1.S1_at   | -1.15 q < 0.0105 | -1.07 q < 1      | -1.11 q < 0.842  | -1.15 q < 0.477 | -1.36 q < 0.0642 | -1.08 q < 1      |
| KLHDC2    | kelch domain containing 2                                             | Ssc.11035.3.A1_at   | 1.13 q < 0.0106  | 1.05 q < 1       | 1.18 q < 0.464   | 1.23 q < 0.145  | 1.12 q < 1       | 1.1 q < 1        |
| SELI      | ethanolaminephosphotransferase 1 (CDP-ethanolamine-specific)          | Ssc.27288.1.S1_at   | 1.17 q < 0.0106  | 1.16 q < 0.936   | -1.04 q < 0.967  | 1.37 q < 0.0545 | 1.26 q < 0.714   | 1.12 q < 1       |
| TRIM26    | tripartite motif-containing 26                                        | Ssc.20734.2.S1_at   | 1.13 q < 0.0108  | 1.03 q < 1       | 1.05 q < 0.938   | 1.23 q < 0.124  | 1.23 q < 0.409   | 1.11 q < 1       |
| CPD       | carboxypeptidase D                                                    | Ssc.1116.1.S1_at    | -1.21 q < 0.0112 | -1.38 q < 0.284  | -1.29 q < 0.477  | -1.1 q < 0.755  | -1.2 q < 1       | -1.13 q < 1      |
| CPD       | homer homolog 2 (Drosophila)                                          | Ssc.1116.1.S1_at    | -1.21 q < 0.0112 | -1.38 q < 0.284  | -1.29 q < 0.477  | -1.1 q < 0.755  | -1.2 q < 1       | -1.13 q < 1      |
| C1orf31   | chromosome 1 open reading frame 31                                    | Ssc.26398.2.S1_a_at | 1.14 q < 0.0112  | 1.32 q < 0.0523  | 1.07 q < 0.911   | 1.01 q < 0.979  | 1.15 q < 1       | 1.16 q < 0.894   |
| GLTSCR2   | glioma tumor suppressor candidate region gene 2                       | Ssc.20716.1.S1_at   | -1.12 q < 0.0113 | -1.06 q < 1      | -1.14 q < 0.584  | -1.19 q < 0.199 | -1.07 q < 1      | -1.14 q < 0.81   |
| ISCA1     | iron-sulfur cluster assembly 1 homolog (S. cerevisiae)                | Ssc.1940.1.S1_a_at  | 1.21 q < 0.0113  | 1.48 q < 0.104   | 1.1 q < 0.913    | 1.18 q < 0.554  | 1.16 q < 1       | 1.19 q < 1       |
| ZC3H12D   | zinc finger CCCH-type containing 12D                                  | Ssc.30602.1.A1_at   | 1.21 q < 0.0115  | 1.09 q < 1       | 1.48 q < 0.0693  | 1.45 q < 0.0644 | 1.11 q < 1       | -1.01 q < 1      |
| AHCTF1P   | AT hook containing transcription factor 1 pseudogene 1                | Ssc.27942.1.A1_at   | -1.14 q < 0.0117 | -1.08 q < 1      | -1.26 q < 0.147  | -1.03 q < 0.904 | -1.16 q < 1      | -1.17 q < 0.753  |
| CACNA2D4  | calcium channel, voltage-dependent, alpha 2/delta subunit 4           | Ssc.28045.1.A1_at   | -1.13 q < 0.0117 | -1.08 q < 1      | -1.24 q < 0.177  | -1.22 q < 0.17  | -1.14 q < 1      | 1.01 q < 1       |
| PEG3      | paternally expressed 3                                                | Ssc.22623.2.S1_at   | -1.33 q < 0.0118 | -1.15 q < 1      | -1.49 q < 0.411  | -1.64 q < 0.131 | -1.18 q < 1      | -1.26 q < 1      |
| PEG3      | paternally expressed 3                                                | Ssc.10530.1.A1_at   | -1.33 q < 0.0235 | -1.17 q < 1      | -1.51 q < 0.448  | -1.61 q < 0.2   | -1.24 q < 1      | -1.18 q < 1      |
| SDC3      | syndecan 3                                                            | Ssc.6589.1.S1_a_at  | -1.18 q < 0.0119 | -1.24 q < 0.664  | -1.13 q < 0.855  | -1.17 q < 0.509 | -1.04 q < 1      | -1.35 q < 0.201  |
| DNAL4     | dynein, axonemal, light chain 4                                       | Ssc.5303.1.S1_at    | -1.14 q < 0.012  | -1.12 q < 1      | -1.2 q < 0.391   | -1.06 q < 0.766 | -1.18 q < 1      | -1.12 q < 1      |
| C15orf33  | chromosome 15 open reading frame 33                                   | Ssc.26783.1.S1_at   | -1.12 q < 0.012  | -1.18 q < 0.527  | -1.16 q < 0.5    | -1.07 q < 0.712 | -1.11 q < 1      | -1.11 q < 1      |
| RIMBP2    | RIMS binding protein 2                                                | Ssc.28484.1.S1_at   | -1.15 q < 0.012  | -1.18 q < 0.715  | -1.11 q < 0.84   | -1.05 q < 0.846 | -1.22 q < 0.724  | -1.17 q < 0.843  |
| Q7L3Y3    | -                                                                     | Ssc.21934.1.A1_at   | -1.12 q < 0.0122 | -1.14 q < 0.72   | -1.11 q < 0.763  | -1.07 q < 0.67  | -1.14 q < 1      | -1.12 q < 1      |
| ZADH2     | zinc binding alcohol dehydrogenase domain containing 2                | Ssc.11794.1.A1_at   | -1.16 q < 0.0123 | -1.07 q < 1      | -1.18 q < 0.661  | -1.22 q < 0.313 | -1.31 q < 0.348  | -1.06 q < 1      |
| SNORD107  | small nucleolar RNA, C/D box 107                                      | Ssc.7020.1.A1_at    | 1.18 q < 0.0124  | 1.22 q < 0.727   | -1.05 q < 0.953  | 1.3 q < 0.187   | 1.13 q < 1       | 1.33 q < 0.25    |
| SLC44A2   | solute carrier family 44, member 2                                    | Ssc.26850.1.S1_at   | 1.14 q < 0.0124  | 1.14 q < 0.949   | 1.13 q < 0.766   | 1.15 q < 0.458  | 1.18 q < 1       | 1.12 q < 1       |
| FSHB      | follicle stimulating hormone, beta polypeptide                        | Ssc.5833.1.A1_at    | 1.13 q < 0.0125  | 1.16 q < 0.767   | 1.11 q < 0.811   | 1.14 q < 0.426  | 1.11 q < 1       | 1.13 q < 1       |
| C14orf65  | entry withdrawn                                                       | Ssc.26910.1.S1_at   | 1.12 q < 0.0128  | 1.22 q < 0.252   | 1.06 q < 0.92    | 1.12 q < 0.507  | 1.02 q < 1       | 1.2 q < 0.366    |
| TEX2      | testis expressed 2                                                    | Ssc.11043.1.A1_at   | 1.39 q < 0.0129  | 1.61 q < 0.502   | 1.41 q < 0.69    | -1.06 q < 0.931 | 2.12 q < 0.063   | 1.15 q < 1       |
| TEX2      | testis expressed 2                                                    | Ssc.11043.2.A1_at   | 1.16 q < 0.0191  | 1.18 q < 0.893   | 1.14 q < 0.808   | -1 q < 0.999    | 1.37 q < 0.183   | 1.16 q < 1       |
| SDCCAG10  | CWC27 spliceosome-associated protein homolog (S. cerevisiae)          | Ssc.10698.1.S1_at   | -1.09 q < 0.0131 | -1.04 q < 1      | -1.15 q < 0.265  | -1.08 q < 0.557 | -1.09 q < 1      | -1.11 q < 0.852  |
| RBMS2P    | RNA binding motif, single stranded interacting protein 2 pseudogene 1 | Ssc.21723.1.S1_at   | -1.14 q < 0.0132 | -1.29 q < 0.144  | -1.15 q < 0.656  | -1.07 q < 0.755 | -1.04 q < 1      | -1.16 q < 0.875  |
| EIF4B     | eukaryotic translation initiation factor 4B                           | Ssc.18323.1.S1_at   | -1.1 q < 0.0133  | -1.07 q < 1      | -1.2 q < 0.0897  | -1 q < 0.985    | -1.13 q < 1      | -1.09 q < 1      |
| XKRX      | XK, Kell blood group complex subunit-related, X-linked                | Ssc.3376.1.S1_at    | -1.25 q < 0.0133 | 1.09 q < 1       | -1.55 q < 0.0983 | -1.2 q < 0.587  | -1.39 q < 0.75   | -1.28 q < 0.926  |
| DGKI      | diacylglycerol kinase, iota                                           | Ssc.30272.1.A1_at   | -1.18 q < 0.0134 | -1.03 q < 1      | -1.17 q < 0.749  | -1.26 q < 0.288 | -1.35 q < 0.331  | -1.11 q < 1      |
| FAM127A   | family with sequence similarity 127, member A                         | Ssc.4896.1.A1_at    | -1.17 q < 0.0134 | -1.2 q < 0.787   | -1.4 q < 0.0637  | -1.02 q < 0.945 | -1.17 q < 1      | -1.09 q < 1      |
| GNPTAB    | N-acetylglucosamine-1-phosphate transferase, alpha and beta subunits  | Ssc.10082.1.A1_at   | -1.22 q < 0.0135 | -1.08 q < 1      | -1.16 q < 0.846  | -1.25 q < 0.438 | -1.41 q < 0.454  | -1.24 q < 0.971  |
| CYP17A1   | cytochrome P450, family 17, subfamily A, polypeptide 1                | Ssc.15060.1.S1_at   | 1.5 q < 0.0136   | 1.26 q < 1       | -1.01 q < 0.997  | 1.52 q < 0.476  | 1.68 q < 1       | 2.41 q < 0.0631  |
| MMRN1     | multimerin 1                                                          | Ssc.14368.1.A1_at   | -1.4 q < 0.0136  | -1.02 q < 1      | -1.54 q < 0.525  | -1.7 q < 0.209  | -1.84 q < 0.358  | -1.11 q < 1      |
| TTC31     | tetratricopeptide repeat domain 31                                    | Ssc.29637.1.A1_at   | -1.11 q < 0.0137 | -1.07 q < 1      | -1.22 q < 0.148  | 1.01 q < 0.971  | -1.16 q < 0.882  | -1.14 q < 0.844  |
| GPR177    | wntless homolog (Drosophila)                                          | Ssc.9713.1.A1_at    | 1.16 q < 0.0138  | 1.08 q < 1       | 1.29 q < 0.208   | 1.17 q < 0.45   | 1.06 q < 1       | 1.21 q < 0.695   |
| ZNF783    | zinc finger family member 783                                         | Ssc.18236.1.S1_at   | -1.12 q < 0.0138 | -1.06 q < 1      | -1.23 q < 0.166  | -1.08 q < 0.647 | -1.13 q < 1      | -1.11 q < 1      |
| TNNC1     | troponin C type 1 (slow)                                              | Ssc.16889.1.S1_at   | -1.27 q < 0.0139 | -1.23 q < 1      | -1.46 q < 0.298  | -1.56 q < 0.113 | -1.04 q < 1      | -1.15 q < 1      |
| TNNC1     | troponin I type 3 (cardiac)                                           | Ssc.16889.1.S1_at   | -1.27 q < 0.0139 | -1.23 q < 1      | -1.46 q < 0.298  | -1.56 q < 0.113 | -1.04 q < 1      | -1.15 q < 1      |
| NP_056245 | -                                                                     | Ssc.15541.1.A1_at   | -1.24 q < 0.014  | -1.22 q < 1      | -1.15 q < 0.885  | -1.16 q < 0.663 | -1.15 q < 1      | -1.59 q < 0.0709 |
| SLC16A10  | solute carrier family 16, member 10 (aromatic amino acid transporter) | Ssc.26633.1.A1_at   | -1.21 q < 0.0141 | -1.54 q < 0.0501 | -1.36 q < 0.287  | 1.27 q < 0.365  | -1.45 q < 0.239  | -1.09 q < 1      |
| MRC11L1   | mannose receptor, C type 1-like 1                                     | Ssc.9229.1.S1_at    | -1.45 q < 0.0142 | -1 q < 1         | -1.5 q < 0.662   | -1.35 q < 0.596 | -1.42 q < 1      | -2.26 q < 0.0594 |
| FBXO22    | F-box protein 22                                                      | Ssc.20801.1.S1_at   | -1.13 q < 0.0142 | -1.17 q < 0.74   | -1.27 q < 0.129  | -1.2 q < 0.269  | -1.02 q < 1      | -1.04 q < 1      |



| Gene Name  | Gene Description                                                                                              | Probe Set ID       | Breed MS-WC      | Day 25 MS-WC    | Day 45 MS-WC     | Day 65 MS-WC     | Day 85 MS-WC     | Day 105 MS-WC    |
|------------|---------------------------------------------------------------------------------------------------------------|--------------------|------------------|-----------------|------------------|------------------|------------------|------------------|
| MBNL2      | muscleblind-like 2 (Drosophila)                                                                               | Ssc.8655.1.A1_at   | -1.18 q < 0.0145 | -1.32 q < 0.325 | -1.36 q < 0.159  | 1.01 q < 0.981   | -1.17 q < 1      | -1.11 q < 1      |
| SH3BGL3    | SH3 domain binding glutamic acid-rich protein like 3                                                          | Ssc.1403.1.S1_at   | -1.19 q < 0.0146 | -1.04 q < 1     | -1.4 q < 0.12    | -1.19 q < 0.496  | -1.09 q < 1      | -1.27 q < 0.665  |
| COQ6       | coenzyme Q6 homolog, monoxygenase (S. cerevisiae)                                                             | Ssc.20196.2.S1_at  | 1.15 q < 0.0146  | 1.03 q < 1      | 1.14 q < 0.73    | 1.33 q < 0.054   | 1.12 q < 1       | 1.13 q < 1       |
| COQ6       | coenzyme Q6 homolog, monoxygenase (S. cerevisiae)                                                             | Ssc.2294.1.S1_a_at | 1.15 q < 0.0283  | 1.04 q < 1      | 1.13 q < 0.828   | 1.26 q < 0.246   | 1.2 q < 1        | 1.14 q < 1       |
| LGALS1     | lectin, galactoside-binding, soluble, 1                                                                       | Ssc.1320.1.A1_at   | -1.3 q < 0.0146  | -1.16 q < 1     | -1.18 q < 0.886  | -1.33 q < 0.449  | -1.2 q < 1       | -1.7 q < 0.111   |
| ZNF622     | zinc finger protein 622                                                                                       | Ssc.19538.1.A1_at  | 1.16 q < 0.0147  | 1.32 q < 0.177  | 1.01 q < 0.997   | 1.26 q < 0.212   | 1.07 q < 1       | 1.17 q < 0.979   |
| CEP250     | centrosomal protein 250kDa                                                                                    | Ssc.27568.1.S1_at  | -1.12 q < 0.0147 | -1.01 q < 1     | -1.25 q < 0.096  | -1.18 q < 0.258  | -1.06 q < 1      | -1.11 q < 1      |
| FAM114A1   | family with sequence similarity 114, member A1                                                                | Ssc.19323.1.S1_at  | -1.15 q < 0.0147 | -1.09 q < 1     | -1.21 q < 0.447  | -1.1 q < 0.65    | -1.1 q < 1       | -1.24 q < 0.433  |
| FAM114A1   | family with sequence similarity 114, member A1                                                                | Ssc.19323.2.S1_at  | -1.14 q < 0.0199 | -1.22 q < 0.503 | -1.24 q < 0.308  | -1.07 q < 0.76   | -1.06 q < 1      | -1.13 q < 1      |
| ATP2B2     | ATPase, Ca++ transporting, plasma membrane 2                                                                  | Ssc.25241.1.S1_at  | 1.23 q < 0.0147  | 1.1 q < 1       | 1.23 q < 0.741   | 1.38 q < 0.231   | 1.15 q < 1       | 1.34 q < 0.608   |
| ATP2B2     | ATPase, Ca++ transporting, plasma membrane 2                                                                  | Ssc.10127.1.A1_at  | 1.18 q < 0.034   | 1.07 q < 1      | 1.19 q < 0.747   | 1.22 q < 0.449   | 1.1 q < 1        | 1.34 q < 0.406   |
| ATP2B2     | ATPase, Ca++ transporting, plasma membrane 4                                                                  | Ssc.25241.1.S1_at  | 1.23 q < 0.0147  | 1.1 q < 1       | 1.23 q < 0.741   | 1.38 q < 0.231   | 1.15 q < 1       | 1.34 q < 0.608   |
| ATP2B2     | ATPase, Ca++ transporting, plasma membrane 4                                                                  | Ssc.10127.1.A1_at  | 1.18 q < 0.034   | 1.07 q < 1      | 1.19 q < 0.747   | 1.22 q < 0.449   | 1.1 q < 1        | 1.34 q < 0.406   |
| AGA        | aspartylglucosaminidase                                                                                       | Ssc.27438.1.S1_at  | -1.28 q < 0.0149 | -1.14 q < 1     | -1.28 q < 0.708  | -1.11 q < 0.804  | -1.44 q < 0.785  | -1.46 q < 0.434  |
| BACE1      | beta-site APP-cleaving enzyme 1                                                                               | Ssc.880.1.A1_at    | -1.1 q < 0.0149  | -1.22 q < 0.121 | -1.07 q < 0.878  | -1.08 q < 0.585  | -1.16 q < 0.73   | 1 q < 1          |
| AP3B1      | adaptor-related protein complex 3, beta 1 subunit                                                             | Ssc.4666.1.A1_at   | 1.16 q < 0.015   | 1.29 q < 0.264  | 1 q < 0.999      | 1.23 q < 0.288   | 1.15 q < 1       | 1.14 q < 1       |
| PPP1CA     | protein phosphatase 1, catalytic subunit, alpha isozyme                                                       | Ssc.21716.1.A1_at  | 1.27 q < 0.015   | 1.25 q < 1      | 1.27 q < 0.702   | 1.62 q < 0.0635  | 1.2 q < 1        | 1.05 q < 1       |
| SOX5       | SRY (sex determining region Y)-box 5                                                                          | Ssc.22778.1.S1_at  | 1.15 q < 0.0151  | 1.19 q < 0.76   | 1.05 q < 0.947   | 1.29 q < 0.126   | 1.2 q < 1        | 1.05 q < 1       |
| ITPK1      | inositol 1,3,4-triphosphate 5/6 kinase                                                                        | Ssc.24396.1.S1_at  | 1.14 q < 0.0151  | 1.18 q < 0.731  | 1.12 q < 0.816   | 1.27 q < 0.122   | 1.1 q < 1        | 1.05 q < 1       |
| ARL4A      | ADP-ribosylation factor-like 4A                                                                               | Ssc.30613.1.A1_at  | -1.15 q < 0.0151 | -1.34 q < 0.104 | -1.16 q < 0.704  | -1.18 q < 0.429  | -1.06 q < 1      | -1.05 q < 1      |
| C10orf68   | chromosome 10 open reading frame 68                                                                           | Ssc.4035.3.S1_at   | 1.14 q < 0.0151  | 1.35 q < 0.0501 | -1.05 q < 0.943  | 1.3 q < 0.0714   | 1.18 q < 1       | -1.03 q < 1      |
| HSF4       | heat shock transcription factor 4                                                                             | Ssc.9258.1.A1_at   | -1.12 q < 0.0151 | -1.11 q < 1     | -1.18 q < 0.403  | -1.04 q < 0.834  | -1.31 q < 0.0501 | 1.01 q < 1       |
| SUV420H1   | suppressor of variegation 4-20 homolog 1 (Drosophila)                                                         | Ssc.5835.1.S1_at   | -1.12 q < 0.0151 | 1.02 q < 1      | -1.21 q < 0.245  | -1.18 q < 0.259  | -1.15 q < 1      | -1.09 q < 1      |
| MEGF11     | multiple EGF-like-domains 11                                                                                  | Ssc.12456.1.A1_at  | 1.29 q < 0.0153  | 1.68 q < 0.113  | -1.04 q < 0.982  | 1.69 q < 0.0635  | -1 q < 1         | 1.31 q < 0.991   |
| C8orf33    | chromosome 8 open reading frame 33                                                                            | Ssc.3829.1.S1_a_at | -1.13 q < 0.0154 | -1 q < 1        | -1.23 q < 0.216  | -1.11 q < 0.566  | -1.11 q < 1      | -1.2 q < 0.509   |
| CDH11      | cadherin 11, type 2, OB-cadherin (osteoblast)                                                                 | Ssc.8698.1.S1_at   | -1.32 q < 0.0157 | -1.1 q < 1      | -1.57 q < 0.28   | -1.49 q < 0.276  | -1.13 q < 1      | -1.38 q < 0.901  |
| GNL2       | guanine nucleotide binding protein-like 2 (nucleolar)                                                         | Ssc.25247.1.S1_at  | -1.13 q < 0.0158 | -1.11 q < 1     | -1.1 q < 0.822   | -1.16 q < 0.365  | -1.16 q < 1      | -1.1 q < 1       |
| RPL13A     | ribosomal protein L13a                                                                                        | Ssc.17024.1.A1_at  | -1.09 q < 0.0158 | 1.02 q < 1      | -1.22 q < 0.0516 | -1.06 q < 0.687  | -1.04 q < 1      | -1.18 q < 0.18   |
| NTSDC2     | 5'-nucleotidase domain containing 2                                                                           | Ssc.5735.1.A1_at   | -1.36 q < 0.0158 | -1.14 q < 1     | -1.48 q < 0.535  | -1.48 q < 0.357  | -1.17 q < 1      | -1.6 q < 0.479   |
| FSTL4      | folliculin-like 4                                                                                             | Ssc.11743.1.S1_at  | -1.2 q < 0.0162  | -1.09 q < 1     | -1.09 q < 0.93   | -1.07 q < 0.827  | -1.34 q < 0.641  | -1.48 q < 0.0843 |
| SKAP1      | src kinase associated phosphoprotein 1                                                                        | Ssc.4835.1.S1_at   | -1.13 q < 0.0162 | -1.21 q < 0.464 | -1.23 q < 0.273  | 1.02 q < 0.951   | -1.08 q < 1      | -1.18 q < 0.683  |
| NUP93      | nucleoporin 93kDa                                                                                             | Ssc.5852.1.A1_at   | 1.21 q < 0.0164  | 1.21 q < 0.991  | 1.01 q < 0.997   | 1.43 q < 0.114   | 1.26 q < 1       | 1.2 q < 1        |
| GLUL       | glutamate-ammonia ligase                                                                                      | Ssc.9637.1.S1_at   | 1.36 q < 0.0164  | 1.96 q < 0.0698 | -1.08 q < 0.967  | -1.01 q < 0.991  | 1.83 q < 0.231   | 1.4 q < 0.964    |
| XRCC6      | X-ray repair complementing defective repair in Chinese hamster cells 6                                        | Ssc.15663.1.S1_at  | -1.12 q < 0.0168 | -1.08 q < 1     | -1.24 q < 0.148  | -1.04 q < 0.842  | -1.08 q < 1      | -1.17 q < 0.618  |
| ACOT1      | acyl-CoA thioesterase 1                                                                                       | Ssc.18475.2.S1_at  | 1.19 q < 0.0168  | 1.47 q < 0.0617 | 1.07 q < 0.94    | 1.23 q < 0.387   | 1.08 q < 1       | 1.13 q < 1       |
| Q9HCM6     | -                                                                                                             | Ssc.24513.1.S1_at  | 1.17 q < 0.017   | 1.09 q < 1      | 1.2 q < 0.607    | 1.15 q < 0.539   | 1.15 q < 1       | 1.24 q < 0.609   |
| Q9HCM6     | -                                                                                                             | Ssc.1118.1.A1_at   | 1.18 q < 0.0327  | 1.04 q < 1      | 1.09 q < 0.917   | 1.38 q < 0.122   | 1.13 q < 1       | 1.28 q < 0.655   |
| TMTC3      | transmembrane and tetratricopeptide repeat containing 3                                                       | Ssc.11289.1.A1_at  | -1.12 q < 0.017  | -1.17 q < 0.596 | -1.07 q < 0.908  | -1.04 q < 0.831  | -1.21 q < 0.544  | -1.12 q < 1      |
| C18orf32   | chromosome 18 open reading frame 32                                                                           | Ssc.9968.1.S1_at   | 1.22 q < 0.017   | 1.25 q < 0.829  | -1.01 q < 0.994  | 1.5 q < 0.0646   | 1.26 q < 1       | 1.14 q < 1       |
| BIN2       | bridging integrator 2                                                                                         | Ssc.4283.1.S1_at   | -1.2 q < 0.0171  | -1.09 q < 1     | -1.15 q < 0.849  | -1.38 q < 0.127  | -1.15 q < 1      | -1.23 q < 0.917  |
| ST6GALNAC2 | ST6 (alpha-N-acetyl-neuraminyl-2,3-beta-galactosyl-1,3)-N-acetylglucosaminidase alpha-2,6-sialyltransferase 2 | Ssc.7269.1.A1_at   | -1.14 q < 0.0172 | -1.3 q < 0.118  | -1.15 q < 0.696  | 1.04 q < 0.852   | -1.15 q < 1      | -1.16 q < 0.958  |
| PIK3C2A    | phosphoinositide-3-kinase, class 2, alpha polypeptide                                                         | Ssc.13442.1.S1_at  | -1.2 q < 0.0174  | -1.33 q < 0.416 | -1.23 q < 0.645  | -1.06 q < 0.846  | -1.23 q < 1      | -1.16 q < 1      |
| MXRA7      | matrix-remodelling associated 7                                                                               | Ssc.19282.1.S1_at  | -1.18 q < 0.0176 | -1.2 q < 0.854  | -1.21 q < 0.626  | -1.08 q < 0.78   | -1.23 q < 1      | -1.17 q < 1      |
| FABP4      | fatty acid binding protein 4, adipocyte                                                                       | Ssc.1089.1.S1_at   | -1.31 q < 0.0177 | -1.03 q < 1     | -1.11 q < 0.942  | -1.71 q < 0.0847 | -1.28 q < 1      | -1.56 q < 0.389  |
| HK1        | hexokinase 1                                                                                                  | Ssc.5615.1.S1_at   | 1.18 q < 0.0178  | 1.16 q < 1      | 1.15 q < 0.81    | 1.13 q < 0.645   | 1.32 q < 0.551   | 1.15 q < 1       |
| HK1        | potassium voltage-gated channel, shaker-related subfamily, member 4                                           | Ssc.5615.1.S1_at   | 1.18 q < 0.0178  | 1.16 q < 1      | 1.15 q < 0.81    | 1.13 q < 0.645   | 1.32 q < 0.551   | 1.15 q < 1       |

| Gene Name | Gene Description                                                                      | Probe Set ID        | Breed MS-WC      | Day 25 MS-WC    | Day 45 MS-WC     | Day 65 MS-WC    | Day 85 MS-WC     | Day 105 MS-WC    |
|-----------|---------------------------------------------------------------------------------------|---------------------|------------------|-----------------|------------------|-----------------|------------------|------------------|
| HK1       | hook homolog 1 (Drosophila)                                                           | Ssc.5615.1.S1_at    | 1.18 q < 0.0178  | 1.16 q < 1      | 1.15 q < 0.81    | 1.13 q < 0.645  | 1.32 q < 0.551   | 1.15 q < 1       |
| UTP3      | UTP3, small subunit (SSU) processome component, homolog (S. cerevisiae)               | Ssc.9528.1.S1_at    | -1.13 q < 0.0179 | -1.13 q < 0.972 | -1.18 q < 0.465  | -1.15 q < 0.421 | -1.08 q < 1      | -1.11 q < 1      |
| EXOC7     | exocyst complex component 7                                                           | Ssc.22063.1.S1_at   | -1.19 q < 0.0179 | -1.06 q < 1     | -1.24 q < 0.57   | -1.19 q < 0.497 | -1.33 q < 0.607  | -1.15 q < 1      |
| PPAP2B    | phosphatidic acid phosphatase type 2B                                                 | Ssc.6233.1.S1_at    | -1.15 q < 0.0179 | -1.26 q < 0.369 | -1.28 q < 0.22   | -1.04 q < 0.87  | -1.16 q < 1      | -1.04 q < 1      |
| RRAGD     | Ras-related GTP binding D                                                             | Ssc.25575.1.S1_at   | -1.16 q < 0.0184 | -1.07 q < 1     | -1.23 q < 0.447  | -1.24 q < 0.277 | -1.29 q < 0.454  | 1.01 q < 1       |
| RRAGD     | Ras-related GTP binding D                                                             | Ssc.15466.1.S1_at   | -1.18 q < 0.028  | -1.02 q < 1     | -1.36 q < 0.204  | -1.21 q < 0.457 | -1.36 q < 0.423  | 1.01 q < 1       |
| AOX1      | aldehyde oxidase 1                                                                    | Ssc.18611.1.A1_at   | -1.14 q < 0.0187 | -1.14 q < 0.991 | -1.33 q < 0.0682 | -1.09 q < 0.698 | -1.11 q < 1      | -1.06 q < 1      |
| CRADD     | CASP2 and RIPK1 domain containing adaptor with death domain                           | Ssc.17839.2.A1_at   | -1.13 q < 0.0188 | -1.13 q < 0.941 | -1.05 q < 0.943  | -1.11 q < 0.586 | -1.25 q < 0.389  | -1.12 q < 1      |
| ERCC5     | excision repair cross-complementing rodent repair deficiency, complementation group 5 | Ssc.6879.1.A1_at    | 1.18 q < 0.0189  | 1.01 q < 1      | -1.03 q < 0.977  | 1.36 q < 0.116  | 1.19 q < 1       | 1.43 q < 0.0744  |
| PREX      | -                                                                                     | Ssc.10373.1.S1_at   | -1.2 q < 0.0189  | -1.16 q < 1     | -1.16 q < 0.842  | -1.19 q < 0.526 | -1.2 q < 1       | -1.3 q < 0.6     |
| EIF2AK1   | eukaryotic translation initiation factor 2-alpha kinase 1                             | Ssc.9900.1.A1_at    | -1.13 q < 0.0191 | -1.06 q < 1     | -1.24 q < 0.195  | -1.06 q < 0.759 | -1.17 q < 1      | -1.11 q < 1      |
| EIF2AK1   | eukaryotic translation initiation factor 2-alpha kinase 2                             | Ssc.9900.1.A1_at    | -1.13 q < 0.0191 | -1.06 q < 1     | -1.24 q < 0.195  | -1.06 q < 0.759 | -1.17 q < 1      | -1.11 q < 1      |
| C15orf29  | chromosome 15 open reading frame 29                                                   | Ssc.14780.1.S1_at   | -1.16 q < 0.0192 | -1.32 q < 0.221 | -1.26 q < 0.332  | 1.01 q < 0.985  | -1.2 q < 1       | -1.05 q < 1      |
| CDC10     | septin 7                                                                              | Ssc.1837.1.A1_at    | -1.17 q < 0.0192 | -1.08 q < 1     | -1.29 q < 0.314  | -1.15 q < 0.548 | -1.16 q < 1      | -1.17 q < 1      |
| SIRT5     | sirtuin 5                                                                             | Ssc.15393.1.S1_at   | -1.15 q < 0.0192 | -1.07 q < 1     | -1.34 q < 0.0786 | -1 q < 0.999    | -1.17 q < 1      | -1.2 q < 0.768   |
| DOLPP1    | dolichyl pyrophosphate phosphatase 1                                                  | Ssc.19574.1.A1_at   | 1.11 q < 0.0193  | 1.16 q < 0.537  | -1.01 q < 0.988  | 1.22 q < 0.0913 | 1.11 q < 1       | 1.07 q < 1       |
| MYH10     | myosin, heavy chain 10, non-muscle                                                    | Ssc.20017.1.A1_at   | -1.12 q < 0.0193 | 1.03 q < 1      | -1.11 q < 0.752  | -1.2 q < 0.176  | -1.08 q < 1      | -1.24 q < 0.151  |
| NRG3      | neuregulin 3                                                                          | Ssc.13323.1.A1_at   | 1.17 q < 0.0193  | 1.32 q < 0.273  | -1.02 q < 0.99   | 1.26 q < 0.278  | 1.09 q < 1       | 1.23 q < 0.747   |
| PRRX2     | paired related homeobox 2                                                             | Ssc.17912.1.A1_s_at | -1.13 q < 0.0194 | -1.19 q < 0.62  | -1.06 q < 0.931  | -1.15 q < 0.46  | -1.01 q < 1      | -1.28 q < 0.138  |
| FZD5      | frizzled homolog 5 (Drosophila)                                                       | Ssc.29483.1.A1_at   | 1.25 q < 0.0195  | 1.44 q < 0.389  | 1.16 q < 0.885   | 1.28 q < 0.469  | 1.03 q < 1       | 1.4 q < 0.544    |
| CNOT1     | CCR4-NOT transcription complex, subunit 1                                             | Ssc.4409.1.A1_at    | 1.14 q < 0.0195  | 1.08 q < 1      | 1.08 q < 0.911   | 1.25 q < 0.187  | 1.15 q < 1       | 1.17 q < 0.912   |
| IFNA8     | interferon, alpha 8                                                                   | Ssc.4815.1.A1_at    | -1.14 q < 0.0195 | -1.05 q < 1     | -1.16 q < 0.665  | -1.22 q < 0.268 | -1.16 q < 1      | -1.14 q < 1      |
| C6orf29   | solute carrier family 44, member 4                                                    | Ssc.4668.1.A1_at    | 1.34 q < 0.0196  | 1.58 q < 0.446  | 1.43 q < 0.583   | 1.24 q < 0.647  | 1.19 q < 1       | 1.3 q < 1        |
| UGT2A1    | UDP glucuronosyltransferase 2 family, polypeptide A1                                  | Ssc.21161.1.S1_at   | -1.16 q < 0.0198 | -1.09 q < 1     | -1.23 q < 0.459  | -1 q < 0.993    | -1.42 q < 0.0756 | -1.11 q < 1      |
| USP10     | ubiquitin specific peptidase 10                                                       | Ssc.10775.1.A1_at   | 1.12 q < 0.0199  | 1.22 q < 0.281  | 1.08 q < 0.861   | 1.14 q < 0.393  | 1 q < 1          | 1.14 q < 0.876   |
| USP10     | ubiquitin specific peptidase 10                                                       | Ssc.14327.1.A1_at   | 1.07 q < 0.426   | 1.05 q < 1      | -1.14 q < 0.662  | 1.15 q < 0.429  | -1.06 q < 1      | 1.38 q < 0.0114  |
| USP10     | ubiquitin specific peptidase 32                                                       | Ssc.10775.1.A1_at   | 1.12 q < 0.0199  | 1.22 q < 0.281  | 1.08 q < 0.861   | 1.14 q < 0.393  | 1 q < 1          | 1.14 q < 0.876   |
| USP10     | ubiquitin specific peptidase 32                                                       | Ssc.14327.1.A1_at   | 1.07 q < 0.426   | 1.05 q < 1      | -1.14 q < 0.662  | 1.15 q < 0.429  | -1.06 q < 1      | 1.38 q < 0.0114  |
| ORS212    | olfactory receptor, family 52, subfamily I, member 2                                  | Ssc.24960.1.S1_at   | -1.11 q < 0.02   | -1.12 q < 0.925 | -1.06 q < 0.903  | -1.04 q < 0.831 | -1.14 q < 1      | -1.19 q < 0.352  |
| FAM84B    | family with sequence similarity 84, member B                                          | Ssc.1831.2.S1_at    | -1.26 q < 0.0201 | -1.18 q < 1     | -1.28 q < 0.705  | -1.24 q < 0.546 | -1.37 q < 1      | -1.23 q < 1      |
| TRAPPC4   | trafficking protein particle complex 4                                                | Ssc.16983.1.S1_at   | 1.14 q < 0.0202  | 1.17 q < 0.829  | 1.03 q < 0.971   | 1.29 q < 0.122  | 1.22 q < 0.862   | 1.03 q < 1       |
| SFRS11    | serine/arginine-rich splicing factor 11                                               | Ssc.8959.1.A1_at    | 1.13 q < 0.0202  | 1 q < 1         | 1.07 q < 0.918   | 1.28 q < 0.102  | 1.07 q < 1       | 1.29 q < 0.136   |
| TOMM40L   | translocase of outer mitochondrial membrane 40 homolog (yeast)-like                   | Ssc.18758.1.S1_at   | 1.11 q < 0.0204  | 1.12 q < 0.901  | 1.09 q < 0.844   | 1.17 q < 0.251  | 1.06 q < 1       | 1.12 q < 1       |
| KIAA0368  | KIAA0368                                                                              | Ssc.18221.1.S1_at   | -1.15 q < 0.0204 | -1.07 q < 1     | -1.23 q < 0.366  | -1.12 q < 0.612 | -1.24 q < 0.716  | -1.08 q < 1      |
| NQO1      | NAD(P)H dehydrogenase, quinone 1                                                      | Ssc.1142.1.S1_at    | 1.18 q < 0.0205  | 1.47 q < 0.0529 | 1.12 q < 0.883   | 1.14 q < 0.611  | 1.04 q < 1       | 1.17 q < 1       |
| CCNK      | cyclin K                                                                              | Ssc.5131.2.A1_at    | 1.14 q < 0.0205  | 1.1 q < 1       | 1.08 q < 0.907   | 1.3 q < 0.0864  | 1.11 q < 1       | 1.13 q < 1       |
| Q6ZW51    | -                                                                                     | Ssc.2492.2.S1_at    | -1.14 q < 0.0205 | -1.12 q < 1     | -1.18 q < 0.584  | -1.05 q < 0.825 | -1.2 q < 1       | -1.16 q < 0.969  |
| Q6ZW51    | -                                                                                     | Ssc.2492.1.A1_at    | -1.18 q < 0.0306 | -1.01 q < 1     | -1.25 q < 0.554  | 1.02 q < 0.954  | -1.42 q < 0.223  | -1.3 q < 0.529   |
| RPL36AL   | ribosomal protein L36a-like                                                           | Ssc.2707.1.S1_at    | -1.13 q < 0.0205 | 1.04 q < 1      | -1.31 q < 0.0705 | -1.01 q < 0.973 | -1.12 q < 1      | -1.29 q < 0.116  |
| TAX1BP1   | Tax1 (human T-cell leukemia virus type I) binding protein 1                           | Ssc.15643.1.S1_at   | -1.15 q < 0.0208 | -1.14 q < 1     | -1.2 q < 0.529   | -1.11 q < 0.632 | -1.19 q < 1      | -1.11 q < 1      |
| TMEM209   | transmembrane protein 209                                                             | Ssc.11253.1.A1_at   | 1.14 q < 0.0208  | 1.1 q < 1       | 1.08 q < 0.898   | 1.3 q < 0.0847  | 1.17 q < 1       | 1.05 q < 1       |
| PLXNC1    | plexin C1                                                                             | Ssc.25153.1.A1_at   | 1.13 q < 0.021   | 1.25 q < 0.247  | -1.02 q < 0.977  | 1.29 q < 0.0658 | -1.01 q < 1      | 1.17 q < 0.732   |
| PLXNC1    | plexin C1                                                                             | Ssc.3879.1.S1_at    | -1.12 q < 0.408  | -1.07 q < 1     | -1.07 q < 0.956  | 1.05 q < 0.891  | 1.02 q < 1       | -1.66 q < 0.0322 |
| Q8TAL6    | -                                                                                     | Ssc.2104.1.S1_at    | -1.38 q < 0.021  | -1.04 q < 1     | -2.01 q < 0.0807 | -1.28 q < 0.634 | -1.28 q < 1      | -1.47 q < 0.92   |
| Q9P273    | -                                                                                     | Ssc.27124.1.A1_at   | -1.19 q < 0.021  | -1.39 q < 0.243 | -1.01 q < 0.997  | -1.1 q < 0.75   | -1.09 q < 1      | -1.45 q < 0.111  |
| ZNF146    | zinc finger protein 146                                                               | Ssc.6436.2.S1_at    | -1.15 q < 0.021  | -1.19 q < 0.78  | -1.26 q < 0.29   | -1.13 q < 0.569 | -1.05 q < 1      | -1.13 q < 1      |
| MAN2A1    | mannosidase, alpha, class 2A, member 1                                                | Ssc.10976.1.S1_at   | 1.09 q < 0.021   | -1.01 q < 1     | 1.08 q < 0.81    | 1.07 q < 0.633  | 1.23 q < 0.0593  | 1.1 q < 1        |

| Gene Name | Gene Description                                                               | Probe Set ID       | Breed MS-WC      | Day 25 MS-WC     | Day 45 MS-WC     | Day 65 MS-WC     | Day 85 MS-WC     | Day 105 MS-WC   |
|-----------|--------------------------------------------------------------------------------|--------------------|------------------|------------------|------------------|------------------|------------------|-----------------|
| FOXP3     | forkhead box N3                                                                | Ssc.24976.1.S1_at  | -1.18 q < 0.0211 | -1.12 q < 1      | -1.32 q < 0.296  | -1.11 q < 0.696  | -1.27 q < 0.948  | -1.1 q < 1      |
| NAP1L1    | nucleosome assembly protein 1-like 1                                           | Ssc.1429.1.A1_at   | -1.24 q < 0.0212 | -1.39 q < 0.471  | -1.19 q < 0.83   | -1.14 q < 0.71   | -1.2 q < 1       | -1.28 q < 0.956 |
| NAP1L1    | nucleosome assembly protein 1-like 1                                           | Ssc.3802.1.S1_at   | -1.23 q < 0.0311 | -1.05 q < 1      | -1.34 q < 0.495  | -1.17 q < 0.651  | -1.36 q < 0.964  | -1.24 q < 1     |
| TFE3      | transcription factor binding to IGHM enhancer 3                                | Ssc.4131.1.S1_at   | -1.13 q < 0.0212 | -1.16 q < 0.784  | -1.16 q < 0.597  | -1.02 q < 0.951  | -1.17 q < 1      | -1.15 q < 0.955 |
| MAF       | v-maf musculoaponeurotic fibrosarcoma oncogene homolog (avian)                 | Ssc.15325.1.S1_at  | -1.23 q < 0.0212 | -1.08 q < 1      | -1.22 q < 0.767  | -1.3 q < 0.38    | -1.25 q < 1      | -1.3 q < 0.785  |
| LEPRE1    | leucine proline-enriched proteoglycan (leprecan) 1                             | Ssc.3670.1.S1_a_at | -1.24 q < 0.0212 | -1.41 q < 0.409  | -1.39 q < 0.392  | -1.16 q < 0.665  | -1.06 q < 1      | -1.21 q < 1     |
| ZKSCAN1   | zinc finger with KRAB and SCAN domains 1                                       | Ssc.22060.1.A1_at  | 1.12 q < 0.0213  | 1.01 q < 1       | 1.22 q < 0.251   | 1.08 q < 0.664   | 1.11 q < 1       | 1.19 q < 0.485  |
| MPI       | mannose phosphate isomerase                                                    | Ssc.8311.1.A1_at   | 1.11 q < 0.0213  | 1.1 q < 1        | 1.02 q < 0.973   | 1.19 q < 0.206   | 1.14 q < 1       | 1.1 q < 1       |
| AKAP13    | A kinase (PRKA) anchor protein 13                                              | Ssc.17348.1.S1_at  | -1.16 q < 0.0213 | -1.07 q < 1      | -1.23 q < 0.447  | -1.05 q < 0.868  | -1.22 q < 1      | -1.23 q < 0.659 |
| HAND2     | heart and neural crest derivatives expressed 2                                 | Ssc.31068.1.A1_at  | -1.31 q < 0.0213 | -1.72 q < 0.147  | -1.28 q < 0.791  | -1.44 q < 0.337  | -1.02 q < 1      | -1.19 q < 1     |
| LSG1      | large subunit GTPase 1 homolog (S. cerevisiae)                                 | Ssc.5261.1.A1_at   | -1.12 q < 0.0214 | -1.15 q < 0.808  | -1.29 q < 0.0704 | -1.28 q < 0.0669 | -1.01 q < 1      | 1.07 q < 1      |
| SYS1      | SYS1 Golgi-localized integral membrane protein homolog (S. cerevisiae)         | Ssc.817.2.A1_at    | 1.14 q < 0.0214  | 1.04 q < 1       | 1.1 q < 0.868    | 1.25 q < 0.182   | 1.07 q < 1       | 1.27 q < 0.288  |
| CLEC4M    | C-type lectin domain family 4, member M                                        | Ssc.29642.1.A1_at  | -1.12 q < 0.0214 | -1.19 q < 0.436  | -1.14 q < 0.647  | -1.11 q < 0.539  | -1.17 q < 0.951  | 1.02 q < 1      |
| RASIP1    | Ras interacting protein 1                                                      | Ssc.26694.1.S1_at  | -1.13 q < 0.0215 | -1.16 q < 0.783  | -1.21 q < 0.347  | -1.04 q < 0.876  | -1.1 q < 1       | -1.14 q < 1     |
| SCHIP1    | schwannomin interacting protein 1                                              | Ssc.6666.1.A1_at   | -1.18 q < 0.0215 | 1.04 q < 1       | -1.26 q < 0.497  | -1.04 q < 0.9    | -1.3 q < 0.744   | -1.42 q < 0.127 |
| C1QTNF6   | C1q and tumor necrosis factor related protein 6                                | Ssc.27811.1.S1_at  | -1.25 q < 0.0216 | -1.61 q < 0.107  | -1.34 q < 0.54   | -1.28 q < 0.468  | 1 q < 1          | -1.11 q < 1     |
| ATXN10    | ataxin 10                                                                      | Ssc.12724.1.S1_at  | -1.16 q < 0.0221 | -1.14 q < 1      | -1.22 q < 0.515  | -1.18 q < 0.445  | -1.09 q < 1      | -1.15 q < 1     |
| GMPT      | guanosine monophosphate reductase                                              | Ssc.3433.2.S1_at   | -1.14 q < 0.0222 | -1.04 q < 1      | -1.26 q < 0.239  | -1.19 q < 0.356  | -1.16 q < 1      | -1.06 q < 1     |
| GMPT      | guanosine monophosphate reductase                                              | Ssc.3433.1.S1_at   | -1.14 q < 0.0389 | 1.01 q < 1       | -1.29 q < 0.225  | -1.19 q < 0.405  | -1.11 q < 1      | -1.15 q < 1     |
| SCCPDH    | saccharopine dehydrogenase (putative)                                          | Ssc.6810.1.A1_at   | 1.2 q < 0.0222   | 1.27 q < 0.732   | 1.03 q < 0.982   | 1.24 q < 0.439   | 1.28 q < 1       | 1.21 q < 1      |
| C16orf73  | chromosome 16 open reading frame 73                                            | Ssc.11467.1.A1_at  | -1.16 q < 0.0224 | 1.04 q < 1       | -1.27 q < 0.31   | -1.26 q < 0.244  | -1.14 q < 1      | -1.18 q < 0.937 |
| NSDHL     | NAD(P) dependent steroid dehydrogenase-like                                    | Ssc.28560.1.A1_at  | 1.14 q < 0.0227  | 1.12 q < 1       | -1.02 q < 0.981  | 1.24 q < 0.218   | 1.11 q < 1       | 1.28 q < 0.247  |
| NSDHL     | NAD(P) dependent steroid dehydrogenase-like                                    | Ssc.3253.1.S1_at   | 1.16 q < 0.0352  | 1.38 q < 0.165   | -1.1 q < 0.898   | 1.24 q < 0.349   | 1.18 q < 1       | 1.17 q < 1      |
| TRAPPC3   | trafficking protein particle complex 3                                         | Ssc.1247.1.S1_at   | -1.16 q < 0.0231 | -1.07 q < 1      | -1.35 q < 0.118  | -1.14 q < 0.569  | -1.08 q < 1      | -1.16 q < 1     |
| BRF2      | BRF2, subunit of RNA polymerase III transcription initiation factor, BRF1-like | Ssc.21555.2.A1_at  | -1.27 q < 0.0232 | -1.38 q < 0.679  | -1.27 q < 0.754  | -1.1 q < 0.818   | -1.57 q < 0.378  | -1.09 q < 1     |
| BRF2      | zinc finger protein 36, C3H type-like 2                                        | Ssc.21555.2.A1_at  | -1.27 q < 0.0232 | -1.38 q < 0.679  | -1.27 q < 0.754  | -1.1 q < 0.818   | -1.57 q < 0.378  | -1.09 q < 1     |
| SERINC3   | serine incorporator 3                                                          | Ssc.7222.1.S1_at   | -1.15 q < 0.0233 | -1.1 q < 1       | -1.3 q < 0.172   | -1.02 q < 0.957  | -1.24 q < 0.777  | -1.1 q < 1      |
| PIBF1     | progesterone immunomodulatory binding factor 1                                 | Ssc.15394.2.S1_at  | -1.1 q < 0.0235  | -1.08 q < 1      | -1.15 q < 0.452  | -1.06 q < 0.736  | -1.15 q < 1      | -1.08 q < 1     |
| SETX      | senataxin                                                                      | Ssc.26227.1.S1_at  | -1.1 q < 0.0237  | -1.09 q < 1      | -1.13 q < 0.555  | -1.09 q < 0.569  | -1.13 q < 1      | -1.06 q < 1     |
| ALKBH1    | alkB, alkylation repair homolog 1 (E. coli)                                    | Ssc.14160.1.S1_at  | -1.12 q < 0.0238 | -1.09 q < 1      | -1.21 q < 0.273  | -1.03 q < 0.894  | -1.17 q < 0.991  | -1.09 q < 1     |
| TNFAIP2   | tumor necrosis factor, alpha-induced protein 2                                 | Ssc.28739.1.S1_at  | 1.12 q < 0.0238  | 1.11 q < 1       | 1.16 q < 0.513   | 1.17 q < 0.3     | 1.06 q < 1       | 1.08 q < 1      |
| YEATS2    | YEATS domain containing 2                                                      | Ssc.6857.1.A1_at   | -1.1 q < 0.0239  | -1.01 q < 1      | -1.23 q < 0.0923 | 1.05 q < 0.779   | -1.21 q < 0.286  | -1.12 q < 0.903 |
| ELOVL2    | elongation of very long chain fatty acids (FEN1/Elo2, SUR4/Elo3, yeast)-like 2 | Ssc.30467.1.A1_at  | 1.48 q < 0.0242  | 1.43 q < 1       | 1.73 q < 0.492   | 1.96 q < 0.189   | 1.03 q < 1       | 1.43 q < 1      |
| FBXO18    | F-box protein, helicase, 18                                                    | Ssc.21961.1.A1_at  | 1.14 q < 0.0243  | 1.17 q < 0.795   | -1 q < 0.997     | 1.24 q < 0.196   | 1.18 q < 1       | 1.11 q < 1      |
| EGFL6     | EGF-like-domain, multiple 6                                                    | Ssc.27626.1.S1_at  | 1.32 q < 0.0243  | 1.44 q < 0.732   | 1 q < 1          | 1.42 q < 0.406   | 1.21 q < 1       | 1.65 q < 0.317  |
| Q8N812    | -                                                                              | Ssc.1197.1.A1_at   | -1.12 q < 0.0243 | -1.05 q < 1      | -1.15 q < 0.606  | -1.07 q < 0.745  | -1.19 q < 0.97   | -1.17 q < 0.732 |
| CD97      | CD97 molecule                                                                  | Ssc.3348.1.S1_at   | -1.11 q < 0.0244 | -1.03 q < 1      | -1.16 q < 0.448  | -1.1 q < 0.575   | -1.03 q < 1      | -1.24 q < 0.124 |
| GGA1      | golgi-associated, gamma adaptin ear containing, ARF binding protein 1          | Ssc.16891.1.S1_at  | -1.14 q < 0.0244 | -1.08 q < 1      | -1.32 q < 0.127  | -1.03 q < 0.926  | -1.2 q < 1       | -1.12 q < 1     |
| STOM      | stomatin                                                                       | Ssc.5834.1.A1_at   | -1.25 q < 0.0247 | 1.06 q < 1       | -1.48 q < 0.243  | -1.3 q < 0.435   | -1.46 q < 0.583  | -1.14 q < 1     |
| PTPRS     | protein tyrosine phosphatase, receptor type, 5                                 | Ssc.21137.1.A1_at  | -1.16 q < 0.0248 | -1.24 q < 0.535  | -1.23 q < 0.468  | -1.14 q < 0.563  | -1.17 q < 1      | -1.01 q < 1     |
| RELL1     | RELT-like 1                                                                    | Ssc.13523.1.A1_at  | -1.11 q < 0.0249 | -1.02 q < 1      | -1.26 q < 0.0796 | -1.16 q < 0.317  | -1.1 q < 1       | -1.03 q < 1     |
| EHD2      | EH-domain containing 2                                                         | Ssc.5576.1.A1_at   | -1.22 q < 0.025  | -1.03 q < 1      | -1.39 q < 0.306  | -1.21 q < 0.539  | -1.26 q < 1      | -1.22 q < 1     |
| RPS3      | ribosomal protein S3                                                           | Ssc.4042.1.S1_at   | -1.1 q < 0.0254  | 1.07 q < 1       | -1.23 q < 0.108  | -1.17 q < 0.234  | -1.04 q < 1      | -1.17 q < 0.494 |
| KLF9      | Kruppel-like factor 9                                                          | Ssc.16664.1.A1_at  | 1.16 q < 0.0258  | -1.04 q < 1      | 1.16 q < 0.771   | 1.12 q < 0.65    | 1.23 q < 1       | 1.37 q < 0.116  |
| ANKRD27   | ankyrin repeat domain 27 (VPS9 domain)                                         | Ssc.7196.1.A1_at   | -1.18 q < 0.0258 | 1.04 q < 1       | -1.28 q < 0.444  | -1.15 q < 0.607  | -1.52 q < 0.0509 | -1.07 q < 1     |
| ANGPTL2   | angiopoietin-like 2                                                            | Ssc.29929.1.S1_at  | -1.29 q < 0.0259 | -1.84 q < 0.0559 | -1.24 q < 0.843  | -1.37 q < 0.418  | 1.08 q < 1       | -1.25 q < 1     |

| Gene Name | Gene Description                                                         | Probe Set ID        | Breed MS-WC      | Day 25 MS-WC     | Day 45 MS-WC     | Day 65 MS-WC     | Day 85 MS-WC    | Day 105 MS-WC   |
|-----------|--------------------------------------------------------------------------|---------------------|------------------|------------------|------------------|------------------|-----------------|-----------------|
| NEK7      | NIMA (never in mitosis gene a)-related kinase 7                          | Ssc.21023.1.S1_at   | -1.24 q < 0.0259 | -1 q < 1         | -1.32 q < 0.552  | -1.16 q < 0.685  | -1.35 q < 1     | -1.4 q < 0.505  |
| TMEM63A   | transmembrane protein 63A                                                | Ssc.5793.1.S1_at    | -1.12 q < 0.026  | -1.1 q < 1       | -1.29 q < 0.0755 | -1.15 q < 0.42   | -1.01 q < 1     | -1.07 q < 1     |
| MAPK8IP3  | mitogen-activated protein kinase 8 interacting protein 3                 | Ssc.18249.1.S1_at   | -1.14 q < 0.026  | -1.19 q < 0.682  | -1.24 q < 0.314  | -1.05 q < 0.841  | -1.12 q < 1     | -1.1 q < 1      |
| BGN       | biglycan                                                                 | Ssc.5943.1.S1_at    | -1.22 q < 0.026  | -1.23 q < 0.984  | -1.55 q < 0.0807 | -1.13 q < 0.708  | -1.12 q < 1     | -1.11 q < 1     |
| UBFD1     | ubiquitin family domain containing 1                                     | Ssc.27821.1.A1_at   | 1.12 q < 0.0261  | 1.08 q < 1       | 1.13 q < 0.703   | 1.14 q < 0.473   | 1.16 q < 1      | 1.1 q < 1       |
| CSF1R     | colony stimulating factor 1 receptor                                     | Ssc.5826.1.A1_at    | -1.34 q < 0.0261 | -1.2 q < 1       | -1.33 q < 0.77   | -1.2 q < 0.72    | -1.18 q < 1     | -1.9 q < 0.09   |
| MRPL11    | mitochondrial ribosomal protein L11                                      | Ssc.6370.1.S1_at    | -1.12 q < 0.0269 | 1.16 q < 0.751   | -1.28 q < 0.109  | -1.14 q < 0.469  | -1.14 q < 1     | -1.25 q < 0.238 |
| RPUSD1    | RNA pseudouridylation synthase domain containing 1                       | Ssc.2915.1.S1_at    | -1.1 q < 0.0269  | -1.12 q < 0.803  | -1.18 q < 0.249  | -1 q < 0.994     | -1.08 q < 1     | -1.11 q < 1     |
| TNRC6C    | trinucleotide repeat containing 6C                                       | Ssc.2114.1.S1_at    | -1.13 q < 0.0271 | -1.14 q < 0.927  | -1.18 q < 0.52   | -1.15 q < 0.444  | -1.2 q < 0.875  | 1.02 q < 1      |
| SUOX      | sulfite oxidase                                                          | Ssc.30859.1.A1_at   | 1.17 q < 0.0272  | 1.05 q < 1       | 1.11 q < 0.884   | 1.4 q < 0.0644   | 1.19 q < 1      | 1.11 q < 1      |
| CCDC80    | coiled-coil domain containing 80                                         | Ssc.3825.1.S1_at    | -1.46 q < 0.0274 | -1.16 q < 1      | -1.95 q < 0.269  | -1.62 q < 0.399  | -1.05 q < 1     | -1.73 q < 0.671 |
| PEX7      | peroxisomal biogenesis factor 7                                          | Ssc.12804.1.S1_at   | 1.15 q < 0.0274  | 1.2 q < 0.727    | -1.04 q < 0.967  | 1.25 q < 0.24    | 1.24 q < 0.831  | 1.11 q < 1      |
| GRB2      | growth factor receptor-bound protein 2                                   | Ssc.26718.1.S1_at   | -1.11 q < 0.0274 | -1.21 q < 0.31   | -1.13 q < 0.658  | -1.09 q < 0.615  | -1.08 q < 1     | -1.06 q < 1     |
| HSPA9     | heat shock 70kDa protein 9 (mortalin)                                    | Ssc.31057.1.A1_s_at | 1.15 q < 0.0275  | 1.31 q < 0.225   | -1.09 q < 0.899  | 1.22 q < 0.344   | 1.19 q < 1      | 1.17 q < 1      |
| AGPAT3    | 1-acylglycerol-3-phosphate O-acyltransferase 3                           | Ssc.5622.1.A1_at    | 1.26 q < 0.0276  | 1.34 q < 0.792   | 1.48 q < 0.302   | 1.49 q < 0.194   | 1.02 q < 1      | 1.05 q < 1      |
| CPXM2     | carboxypeptidase X (M14 family), member 2                                | Ssc.26276.1.S1_at   | -1.59 q < 0.0277 | -1.59 q < 1      | -1.31 q < 0.911  | 1.1 q < 0.917    | -2.1 q < 0.779  | -2.58 q < 0.164 |
| MAGT1     | magnesium transporter 1                                                  | Ssc.17326.1.A1_at   | -1.24 q < 0.0278 | -1.16 q < 1      | -1.49 q < 0.216  | -1.04 q < 0.925  | -1.35 q < 1     | -1.22 q < 1     |
| ADAM18    | ADAM metalloproteinase domain 18                                         | Ssc.13121.1.A1_at   | 1.12 q < 0.0278  | 1.04 q < 1       | 1.13 q < 0.708   | 1.2 q < 0.233    | 1.15 q < 1      | 1.07 q < 1      |
| CNIH      | cornichon homolog (Drosophila)                                           | Ssc.6495.1.S1_at    | 1.18 q < 0.0278  | 1.31 q < 0.432   | -1.01 q < 0.993  | 1.27 q < 0.308   | 1.16 q < 1      | 1.19 q < 1      |
| PARVG     | parvin, gamma                                                            | Ssc.10710.1.A1_at   | -1.16 q < 0.028  | -1.09 q < 1      | -1.05 q < 0.951  | -1.17 q < 0.5    | -1.32 q < 0.42  | -1.18 q < 1     |
| NKIRAS1   | NFKB inhibitor interacting Ras-like 1                                    | Ssc.12641.1.S1_at   | -1.13 q < 0.0283 | -1.16 q < 0.807  | -1.26 q < 0.181  | -1.06 q < 0.776  | -1.06 q < 1     | -1.11 q < 1     |
| DUSP22    | dual specificity phosphatase 22                                          | Ssc.25180.1.S1_at   | -1.13 q < 0.0285 | -1 q < 1         | -1.22 q < 0.317  | -1.14 q < 0.489  | -1.18 q < 1     | -1.11 q < 1     |
| MRPL28    | mitochondrial ribosomal protein L28                                      | Ssc.3916.1.A1_at    | -1.12 q < 0.0287 | -1.02 q < 1      | -1.21 q < 0.289  | -1.07 q < 0.736  | -1.09 q < 1     | -1.22 q < 0.325 |
| LPIN1     | lipin 1                                                                  | Ssc.1942.1.S1_at    | -1.14 q < 0.0288 | -1.15 q < 0.938  | -1.16 q < 0.662  | -1.16 q < 0.477  | -1.15 q < 1     | -1.07 q < 1     |
| SNX6      | sorting nexin 6                                                          | Ssc.16529.1.S1_at   | -1.18 q < 0.0294 | 1 q < 1          | -1.18 q < 0.756  | -1.11 q < 0.714  | -1.22 q < 1     | -1.42 q < 0.124 |
| HOXD9     | homeobox D9                                                              | Ssc.23551.1.S1_at   | 1.13 q < 0.0295  | 1.08 q < 1       | 1.08 q < 0.903   | 1.21 q < 0.249   | 1.13 q < 1      | 1.14 q < 1      |
| DAD1      | defender against cell death 1                                            | Ssc.11184.1.S1_at   | -1.19 q < 0.0297 | -1.12 q < 1      | -1.42 q < 0.147  | 1.02 q < 0.952   | -1.13 q < 1     | -1.36 q < 0.365 |
| ASTN2     | astrotactin 2                                                            | Ssc.30418.1.A1_at   | -1.13 q < 0.0298 | -1.31 q < 0.0818 | -1.05 q < 0.937  | -1.05 q < 0.81   | -1.07 q < 1     | -1.16 q < 0.893 |
| MTMR9     | myotubularin related protein 9                                           | Ssc.14180.1.A1_at   | -1.12 q < 0.0301 | -1.2 q < 0.413   | -1.13 q < 0.714  | -1.07 q < 0.715  | -1.12 q < 1     | -1.06 q < 1     |
| UST       | uronyl-2-sulfotransferase                                                | Ssc.18781.1.A1_at   | -1.15 q < 0.0301 | -1.06 q < 1      | -1.08 q < 0.919  | 1.01 q < 0.983   | -1.34 q < 0.215 | -1.3 q < 0.234  |
| UST       | uronyl-2-sulfotransferase                                                | Ssc.30640.1.S1_at   | 1.19 q < 0.0318  | 1.09 q < 1       | 1.15 q < 0.855   | 1.38 q < 0.156   | 1.22 q < 1      | 1.13 q < 1      |
| TRRAP     | transformation/transcription domain-associated protein                   | Ssc.4749.1.S1_at    | 1.17 q < 0.0302  | 1.03 q < 1       | 1.2 q < 0.662    | 1.39 q < 0.083   | 1.08 q < 1      | 1.17 q < 1      |
| ABLIM3    | actin binding LIM protein family, member 3                               | Ssc.5414.1.S1_at    | -1.21 q < 0.0304 | -1.22 q < 0.977  | -1.44 q < 0.188  | -1.2 q < 0.556   | -1.15 q < 1     | -1.06 q < 1     |
| ABLIM3    | actin binding LIM protein family, member 3                               | Ssc.27988.1.A1_at   | 1.1 q < 0.105    | -1.04 q < 1      | 1.07 q < 0.91    | 1.5 q < 0.000304 | 1 q < 1         | 1.04 q < 1      |
| SPOCK1    | sparc/osteonectin, cwcv and kazal-like domains proteoglycan (testican) 1 | Ssc.25458.1.S1_at   | 1.13 q < 0.0304  | -1.01 q < 1      | 1.35 q < 0.0554  | 1.2 q < 0.329    | 1.13 q < 1      | 1.04 q < 1      |
| COX8A     | cytochrome c oxidase subunit VIIIA (ubiquitous)                          | Ssc.26496.1.A1_at   | 1.13 q < 0.0304  | 1.07 q < 1       | 1.11 q < 0.847   | 1.29 q < 0.0908  | 1.13 q < 1      | 1.07 q < 1      |
| FMOD      | fibromodulin                                                             | Ssc.11858.1.S1_at   | -1.55 q < 0.0306 | -1.47 q < 1      | -1.65 q < 0.69   | -1.64 q < 0.48   | -1.2 q < 1      | -1.9 q < 0.672  |
| COQ4      | coenzyme Q4 homolog (S. cerevisiae)                                      | Ssc.4213.1.S1_at    | 1.13 q < 0.0306  | 1.08 q < 1       | 1 q < 1          | 1.21 q < 0.247   | 1.05 q < 1      | 1.32 q < 0.0745 |
| SOX13     | SRY (sex determining region Y)-box 13                                    | Ssc.12263.1.A1_at   | -1.13 q < 0.0308 | -1.07 q < 1      | -1.26 q < 0.195  | -1.07 q < 0.747  | -1.26 q < 0.42  | -1.01 q < 1     |
| CBLB      | Cas-Br-M (murine) ecotropic retroviral transforming sequence b           | Ssc.2567.2.A1_at    | -1.16 q < 0.0308 | -1.14 q < 1      | -1.27 q < 0.375  | -1.27 q < 0.256  | -1.14 q < 1     | 1 q < 1         |
| CBLB      | methylmalonic aciduria (cobalamin deficiency) cblB type                  | Ssc.2567.2.A1_at    | -1.16 q < 0.0308 | -1.14 q < 1      | -1.27 q < 0.375  | -1.27 q < 0.256  | -1.14 q < 1     | 1 q < 1         |
| ECD       | ecdysoneless homolog (Drosophila)                                        | Ssc.13124.1.S1_at   | 1.13 q < 0.031   | -1.01 q < 1      | 1.21 q < 0.398   | 1.25 q < 0.142   | 1.06 q < 1      | 1.13 q < 1      |
| ECD       | split hand/foot malformation (ectrodactyly) type 1                       | Ssc.13124.1.S1_at   | 1.13 q < 0.031   | -1.01 q < 1      | 1.21 q < 0.398   | 1.25 q < 0.142   | 1.06 q < 1      | 1.13 q < 1      |
| OBFC2B    | oligonucleotide/oligosaccharide-binding fold containing 2B               | Ssc.2422.1.S1_at    | -1.14 q < 0.031  | -1.16 q < 0.893  | -1.25 q < 0.286  | 1.02 q < 0.958   | -1.16 q < 1     | -1.15 q < 1     |
| FANCG     | Fanconi anemia, complementation group G                                  | Ssc.22197.1.S1_at   | -1.15 q < 0.0311 | -1.03 q < 1      | -1.12 q < 0.86   | -1.34 q < 0.085  | -1.32 q < 0.348 | 1.02 q < 1      |
| TCP11L1   | t-complex 11 (mouse)-like 1                                              | Ssc.7564.1.A1_at    | -1.14 q < 0.0314 | -1.19 q < 0.72   | -1.25 q < 0.3    | 1.07 q < 0.754   | -1.16 q < 1     | -1.18 q < 0.838 |
| TSPAN6    | tetraspanin 6                                                            | Ssc.16583.1.S1_at   | -1.12 q < 0.0315 | -1.06 q < 1      | -1.3 q < 0.0885  | -1.14 q < 0.499  | -1.09 q < 1     | -1.06 q < 1     |

| Gene Name | Gene Description                                                  | Probe Set ID        | Breed MS-WC      | Day 25 MS-WC     | Day 45 MS-WC    | Day 65 MS-WC    | Day 85 MS-WC     | Day 105 MS-WC   |
|-----------|-------------------------------------------------------------------|---------------------|------------------|------------------|-----------------|-----------------|------------------|-----------------|
| C2orf31   | frizzled homolog 5 (Drosophila)                                   | Ssc.13439.1.A1_at   | 1.31 q < 0.0318  | 1.59 q < 0.373   | 1.12 q < 0.94   | 1.42 q < 0.396  | 1.04 q < 1       | 1.45 q < 0.752  |
| LAPTM5    | lysosomal protein transmembrane 5                                 | Ssc.22037.1.S1_at   | -1.4 q < 0.0318  | 1.09 q < 1       | -1.57 q < 0.554 | -1.62 q < 0.329 | -1.35 q < 1      | -1.7 q < 0.559  |
| PHF21A    | PHD finger protein 21A                                            | Ssc.29183.1.A1_at   | 1.1 q < 0.0323   | 1.03 q < 1       | 1.08 q < 0.852  | 1.2 q < 0.136   | 1.03 q < 1       | 1.17 q < 0.494  |
| PITX2     | paired-like homeodomain 2                                         | Ssc.6994.1.S1_at    | -1.28 q < 0.0323 | -1.23 q < 1      | -1.34 q < 0.647 | -1.38 q < 0.393 | -1.06 q < 1      | -1.4 q < 0.759  |
| RGN       | regucalcin (senescence marker protein-30)                         | Ssc.13891.1.A1_at   | -1.85 q < 0.0323 | 1.14 q < 1       | -2.7 q < 0.375  | -1.45 q < 0.731 | -2.94 q < 0.604  | -2.12 q < 0.931 |
| ERC1      | ELKS/RAB6-interacting/CAST family member 1                        | Ssc.3221.2.S1_at    | -1.15 q < 0.0327 | -1.04 q < 1      | -1.3 q < 0.195  | -1.11 q < 0.667 | -1.15 q < 1      | -1.15 q < 1     |
| LACTB     | lactamase, beta                                                   | Ssc.26736.1.A1_at   | -1.13 q < 0.0328 | 1.01 q < 1       | -1.18 q < 0.52  | -1.16 q < 0.418 | -1.16 q < 1      | -1.15 q < 1     |
| GPC4      | glypican 4                                                        | Ssc.29046.1.S1_at   | -1.3 q < 0.0329  | -1.26 q < 1      | -1.25 q < 0.843 | -1.37 q < 0.446 | -1.15 q < 1      | -1.5 q < 0.608  |
| QKI       | quaking homolog, KH domain RNA binding (mouse)                    | Ssc.21958.1.S1_at   | 1.24 q < 0.0329  | 1.43 q < 0.418   | 1.21 q < 0.817  | 1.44 q < 0.213  | 1.06 q < 1       | 1.09 q < 1      |
| QKI       | quaking homolog, KH domain RNA binding (mouse)                    | Ssc.7659.1.A1_at    | -1.14 q < 0.0432 | -1.1 q < 1       | -1.27 q < 0.253 | -1.21 q < 0.32  | -1.1 q < 1       | -1.01 q < 1     |
| Q8N9L7    | -                                                                 | Ssc.27396.1.A1_at   | -1.12 q < 0.033  | -1.08 q < 1      | -1.18 q < 0.496 | -1.03 q < 0.914 | -1.29 q < 0.219  | -1.06 q < 1     |
| DLG2      | discs, large homolog 2 (Drosophila)                               | Ssc.29215.1.A1_at   | 1.13 q < 0.0333  | 1.09 q < 1       | 1.14 q < 0.739  | 1.26 q < 0.156  | 1.08 q < 1       | 1.1 q < 1       |
| DLG2      | membrane protein, palmitoylated 2 (MAGUK p55 subfamily member 2)  | Ssc.29215.1.A1_at   | 1.13 q < 0.0333  | 1.09 q < 1       | 1.14 q < 0.739  | 1.26 q < 0.156  | 1.08 q < 1       | 1.1 q < 1       |
| SLC15A1   | solute carrier family 15 (oligopeptide transporter), member 1     | Ssc.17339.1.S1_at   | -1.37 q < 0.0333 | 1.01 q < 1       | 1.17 q < 0.929  | -1.82 q < 0.146 | -2.07 q < 0.143  | -1.53 q < 0.816 |
| CRIM1     | cysteine rich transmembrane BMP regulator 1 (chordin-like)        | Ssc.4900.1.A1_at    | 1.12 q < 0.0334  | 1.03 q < 1       | 1.09 q < 0.878  | 1.2 q < 0.244   | 1.07 q < 1       | 1.21 q < 0.439  |
| RPS6      | ribosomal protein S6                                              | Ssc.15665.1.S1_at   | -1.08 q < 0.0337 | 1.02 q < 1       | -1.15 q < 0.272 | -1.1 q < 0.411  | -1.03 q < 1      | -1.15 q < 0.348 |
| ZNF114    | zinc finger protein 114                                           | Ssc.25434.1.S1_at   | -1.12 q < 0.0338 | -1.18 q < 0.563  | -1.17 q < 0.503 | -1.01 q < 0.98  | -1.09 q < 1      | -1.14 q < 0.937 |
| TNFRSF1B  | tumor necrosis factor receptor superfamily, member 1B             | Ssc.15242.1.S1_at   | -1.14 q < 0.034  | -1.08 q < 1      | -1.18 q < 0.652 | -1.08 q < 0.751 | -1.09 q < 1      | -1.31 q < 0.205 |
| YIPF6     | Yip1 domain family, member 6                                      | Ssc.12989.1.A1_at   | -1.12 q < 0.034  | -1.32 q < 0.0785 | -1.09 q < 0.885 | -1.01 q < 0.966 | -1.19 q < 1      | -1.05 q < 1     |
| FAM60A    | family with sequence similarity 60, member A                      | Ssc.28499.1.S1_at   | 1.16 q < 0.0341  | 1.02 q < 1       | 1.27 q < 0.362  | 1.2 q < 0.417   | -1.01 q < 1      | 1.35 q < 0.177  |
| RPS16     | ribosomal protein S16                                             | Ssc.16651.1.S1_at   | -1.1 q < 0.0341  | 1.01 q < 1       | -1.23 q < 0.117 | -1.14 q < 0.393 | 1.03 q < 1       | -1.21 q < 0.238 |
| HNRPLL    | heterogeneous nuclear ribonucleoprotein L-like                    | Ssc.1672.1.A1_at    | -1.12 q < 0.0346 | 1.03 q < 1       | -1.2 q < 0.406  | -1.15 q < 0.457 | -1.17 q < 1      | -1.14 q < 1     |
| C10orf118 | chromosome 10 open reading frame 118                              | Ssc.24426.1.S1_at   | -1.11 q < 0.0346 | -1.27 q < 0.0944 | -1.12 q < 0.731 | -1.06 q < 0.779 | -1.1 q < 1       | -1.02 q < 1     |
| GPRC5C    | G protein-coupled receptor, family C, group 5, member C           | Ssc.4105.1.S1_at    | 1.19 q < 0.0351  | 1.02 q < 1       | 1.31 q < 0.421  | 1.29 q < 0.332  | 1.22 q < 1       | 1.14 q < 1      |
| MTCH1     | mitochondrial carrier homolog 1 (C. elegans)                      | Ssc.3750.1.S1_at    | -1.11 q < 0.0352 | 1.02 q < 1       | -1.19 q < 0.337 | -1.07 q < 0.707 | -1.1 q < 1       | -1.23 q < 0.239 |
| PCGF5     | polycomb group ring finger 5                                      | Ssc.11641.1.A1_at   | -1.11 q < 0.0354 | -1.23 q < 0.201  | -1.13 q < 0.661 | -1.03 q < 0.867 | -1.11 q < 1      | -1.05 q < 1     |
| SRPK2     | SRSF protein kinase 2                                             | Ssc.17862.1.A1_at   | -1.13 q < 0.0354 | -1.19 q < 0.658  | -1.3 q < 0.114  | 1.09 q < 0.694  | -1.13 q < 1      | -1.13 q < 1     |
| HNMT      | histamine N-methyltransferase                                     | Ssc.28933.1.S1_at   | 1.11 q < 0.0357  | -1.01 q < 1      | 1.25 q < 0.155  | -1.03 q < 0.902 | 1.19 q < 0.821   | 1.2 q < 0.452   |
| OSBP19    | oxysterol binding protein-like 9                                  | Ssc.12121.1.S1_at   | -1.26 q < 0.0357 | -1.26 q < 1      | -1.47 q < 0.34  | -1.11 q < 0.807 | -1.17 q < 1      | -1.3 q < 1      |
| TMEM87B   | transmembrane protein 87B                                         | Ssc.27891.1.S1_at   | 1.18 q < 0.0357  | 1.15 q < 1       | 1.09 q < 0.929  | 1.41 q < 0.11   | 1.16 q < 1       | 1.13 q < 1      |
| SLC27A6   | solute carrier family 27 (fatty acid transporter), member 6       | Ssc.24721.1.A1_at   | 1.16 q < 0.0361  | 1.27 q < 0.487   | 1.22 q < 0.576  | 1.27 q < 0.264  | 1.06 q < 1       | 1 q < 1         |
| TLK1      | tousled-like kinase 1                                             | Ssc.24888.1.S1_at   | -1.12 q < 0.0363 | -1.08 q < 1      | -1.11 q < 0.814 | -1.01 q < 0.955 | -1.3 q < 0.133   | -1.11 q < 1     |
| ATP6V0D1  | ATPase, H+ transporting, lysosomal 38kDa, VO subunit d1           | Ssc.12957.1.A1_at   | -1.1 q < 0.0364  | -1.03 q < 1      | -1.16 q < 0.429 | -1.19 q < 0.165 | 1.04 q < 1       | -1.17 q < 0.491 |
| CENTG2    | ArfGAP with GTPase domain, ankyrin repeat and PH domain 1         | Ssc.23897.1.S1_a_at | -1.11 q < 0.0365 | -1.19 q < 0.479  | -1.18 q < 0.467 | -1.14 q < 0.435 | -1.07 q < 1      | -1 q < 1        |
| WDR70     | WD repeat domain 70                                               | Ssc.31089.1.A1_at   | 1.18 q < 0.0366  | 1.42 q < 0.139   | 1.03 q < 0.979  | 1.24 q < 0.393  | 1.09 q < 1       | 1.13 q < 1      |
| TCF21     | transcription factor 21                                           | Ssc.5396.1.S1_at    | -1.32 q < 0.0368 | -1.82 q < 0.152  | -1.63 q < 0.301 | -1.2 q < 0.718  | -1.08 q < 1      | -1.05 q < 1     |
| CLEC3B    | C-type lectin domain family 3, member B                           | Ssc.5704.1.S1_at    | -1.15 q < 0.0368 | 1 q < 1          | 1.05 q < 0.956  | -1.19 q < 0.439 | -1.42 q < 0.0898 | -1.27 q < 0.487 |
| ZNF547    | zinc finger protein 547                                           | Ssc.8205.1.A1_at    | -1.12 q < 0.0368 | -1.06 q < 1      | -1.17 q < 0.546 | -1.14 q < 0.467 | -1.16 q < 1      | -1.07 q < 1     |
| GLRB      | glycine receptor, beta                                            | Ssc.6613.1.A1_at    | 1.1 q < 0.037    | 1.01 q < 1       | 1.11 q < 0.7    | -1.02 q < 0.938 | 1.16 q < 0.921   | 1.25 q < 0.0693 |
| MYADM     | myeloid-associated differentiation marker                         | Ssc.15508.1.S1_at   | -1.26 q < 0.0371 | 1.1 q < 1        | -1.34 q < 0.632 | -1.45 q < 0.274 | -1.19 q < 1      | -1.53 q < 0.374 |
| RPL18     | ribosomal protein L18                                             | Ssc.10553.1.A1_a_at | -1.11 q < 0.0371 | 1.03 q < 1       | -1.22 q < 0.202 | -1.16 q < 0.32  | 1.01 q < 1       | -1.22 q < 0.252 |
| SGK2      | serum/glucocorticoid regulated kinase 2                           | Ssc.24957.1.S1_at   | 1.5 q < 0.0371   | 1.02 q < 1       | 1.57 q < 0.726  | 2.25 q < 0.127  | 1.32 q < 1       | 1.6 q < 1       |
| SGK2      | serum/glucocorticoid regulated kinase family, member 3            | Ssc.24957.1.S1_at   | 1.5 q < 0.0371   | 1.02 q < 1       | 1.57 q < 0.726  | 2.25 q < 0.127  | 1.32 q < 1       | 1.6 q < 1       |
| TMEM176B  | transmembrane protein 176B                                        | Ssc.11219.1.S1_at   | -1.13 q < 0.0371 | -1.1 q < 1       | -1.11 q < 0.853 | 1.02 q < 0.939  | -1.19 q < 1      | -1.32 q < 0.128 |
| CTGF      | connective tissue growth factor                                   | Ssc.8562.3.A1_at    | -1.53 q < 0.0372 | -1.16 q < 1      | -1.37 q < 0.881 | -2.09 q < 0.217 | -1.82 q < 1      | -1.41 q < 1     |
| TSKU      | tsukushi small leucine rich proteoglycan homolog (Xenopus laevis) | Ssc.21942.3.A1_a_at | -1.14 q < 0.0373 | -1.29 q < 0.248  | -1.14 q < 0.788 | -1.1 q < 0.657  | 1.04 q < 1       | -1.22 q < 0.62  |
| COPG      | coatomer protein complex, subunit gamma                           | Ssc.18388.1.A1_at   | -1.28 q < 0.0374 | -1.37 q < 0.829  | -1.73 q < 0.108 | -1.08 q < 0.867 | -1.06 q < 1      | -1.26 q < 1     |

| Gene Name | Gene Description                                                      | Probe Set ID        | Breed MS-WC      | Day 25 MS-WC     | Day 45 MS-WC     | Day 65 MS-WC    | Day 85 MS-WC    | Day 105 MS-WC    |
|-----------|-----------------------------------------------------------------------|---------------------|------------------|------------------|------------------|-----------------|-----------------|------------------|
| SIL1      | SIL1 homolog, endoplasmic reticulum chaperone (S. cerevisiae)         | Ssc.21852.1.S1_at   | 1.11 q < 0.0374  | 1.09 q < 1       | 1.01 q < 0.989   | 1.18 q < 0.242  | 1.18 q < 0.84   | 1.08 q < 1       |
| FKBP15    | FK506 binding protein 15, 133kDa                                      | Ssc.5052.1.S1_at    | -1.16 q < 0.0376 | -1.16 q < 1      | -1.31 q < 0.256  | -1.12 q < 0.644 | -1.07 q < 1     | -1.13 q < 1      |
| MYO1D     | myosin ID                                                             | Ssc.4520.1.S1_at    | 1.23 q < 0.0376  | 1.29 q < 0.869   | 1.15 q < 0.898   | 1.58 q < 0.0846 | 1.11 q < 1      | 1.1 q < 1        |
| CASK      | calcium/calmodulin-dependent serine protein kinase (MAGUK family)     | Ssc.12901.2.A1_at   | -1.16 q < 0.0376 | -1.01 q < 1      | -1.29 q < 0.363  | -1.22 q < 0.401 | -1.15 q < 1     | -1.17 q < 1      |
| NDUFC1    | NADH dehydrogenase (ubiquinone) 1, subcomplex unknown, 1, 6kDa        | Ssc.3869.1.A1_at    | 1.19 q < 0.0383  | 1.34 q < 0.471   | 1.09 q < 0.93    | 1.17 q < 0.612  | 1.24 q < 1      | 1.15 q < 1       |
| CHD8      | chromodomain helicase DNA binding protein 8                           | Ssc.29071.1.A1_at   | -1.13 q < 0.0384 | -1.16 q < 0.857  | -1.13 q < 0.749  | -1.06 q < 0.778 | -1.12 q < 1     | -1.15 q < 0.962  |
| PAQR5     | progesterin and adipoQ receptor family member V                       | Ssc.18808.1.S1_at   | 1.18 q < 0.0384  | -1.01 q < 1      | 1.35 q < 0.29    | 1.38 q < 0.145  | 1.11 q < 1      | 1.12 q < 1       |
| NEK1      | NIMA (never in mitosis gene a)-related kinase 1                       | Ssc.9260.1.A1_at    | -1.15 q < 0.0385 | -1.01 q < 1      | -1.26 q < 0.337  | -1.07 q < 0.776 | -1.26 q < 0.749 | -1.14 q < 1      |
| NTRI      | neurotrimin                                                           | Ssc.6392.1.S1_at    | -1.11 q < 0.0386 | -1.25 q < 0.194  | 1.01 q < 0.993   | -1.11 q < 0.552 | -1.1 q < 1      | -1.13 q < 1      |
| SRP72     | signal recognition particle 72kDa                                     | Ssc.12078.1.A1_at   | -1.11 q < 0.0391 | -1.08 q < 1      | -1.24 q < 0.2    | -1.02 q < 0.946 | -1.04 q < 1     | -1.21 q < 0.399  |
| DDAH1     | dimethylarginine dimethylaminohydrolase 1                             | Ssc.16839.1.S1_at   | 1.31 q < 0.0392  | 1.36 q < 0.933   | 1.48 q < 0.51    | 1.62 q < 0.197  | 1.02 q < 1      | 1.16 q < 1       |
| HTATIP2   | HIV-1 Tat interactive protein 2, 30kDa                                | Ssc.4271.1.S1_at    | 1.15 q < 0.0394  | 1.31 q < 0.265   | 1.03 q < 0.982   | 1.23 q < 0.332  | 1.17 q < 1      | 1.04 q < 1       |
| FTH1      | ferritin, heavy polypeptide 1                                         | Ssc.12288.1.A1_a_at | -1.12 q < 0.0396 | 1.09 q < 1       | -1.22 q < 0.269  | -1.18 q < 0.324 | -1.03 q < 1     | -1.28 q < 0.131  |
| GPR153    | G protein-coupled receptor 153                                        | Ssc.28878.1.S1_at   | -1.14 q < 0.0396 | -1.15 q < 0.968  | -1.11 q < 0.849  | -1.04 q < 0.88  | -1.12 q < 1     | -1.28 q < 0.306  |
| IPO5      | importin 5                                                            | Ssc.6727.1.S1_at    | -1.16 q < 0.0396 | 1.03 q < 1       | -1.27 q < 0.424  | -1.21 q < 0.44  | -1.08 q < 1     | -1.32 q < 0.338  |
| LOXL2     | lysyl oxidase-like 2                                                  | Ssc.2598.1.S1_at    | -1.39 q < 0.0396 | -1.62 q < 0.673  | -1.25 q < 0.898  | -1.12 q < 0.863 | -1.3 q < 1      | -1.8 q < 0.419   |
| MRPS26    | mitochondrial ribosomal protein S26                                   | Ssc.12554.1.A1_at   | -1.11 q < 0.0396 | 1.03 q < 1       | -1.21 q < 0.286  | -1.12 q < 0.515 | -1.05 q < 1     | -1.22 q < 0.286  |
| PPP2R2B   | protein phosphatase 2, regulatory subunit B, beta                     | Ssc.21607.1.A1_at   | -1.49 q < 0.0396 | -1.11 q < 1      | -1.34 q < 0.881  | -1.92 q < 0.261 | -1.18 q < 1     | -2.17 q < 0.278  |
| TNFAIP8L3 | tumor necrosis factor, alpha-induced protein 8-like 3                 | Ssc.6503.1.A1_at    | -1.13 q < 0.0397 | 1.01 q < 1       | -1.34 q < 0.0652 | -1.26 q < 0.173 | 1.08 q < 1      | -1.2 q < 0.731   |
| SMPD1     | sphingomyelin phosphodiesterase 1, acid lysosomal                     | Ssc.2209.1.S1_at    | -1.17 q < 0.04   | -1.44 q < 0.0928 | -1.23 q < 0.576  | -1.25 q < 0.343 | -1.03 q < 1     | 1.06 q < 1       |
| TMEM65    | transmembrane protein 65                                              | Ssc.10752.1.A1_at   | 1.12 q < 0.0401  | 1.31 q < 0.077   | 1.03 q < 0.976   | 1.16 q < 0.405  | -1.03 q < 1     | 1.16 q < 0.919   |
| Q9NW24    | -                                                                     | Ssc.18306.1.A1_at   | 2.81 q < 0.0405  | 1.92 q < 1       | 1.83 q < 0.913   | 2.26 q < 0.65   | 5.48 q < 0.823  | 3.99 q < 0.856   |
| Q9P145    | -                                                                     | Ssc.12395.1.A1_at   | -1.11 q < 0.0405 | -1.12 q < 1      | -1.08 q < 0.878  | -1.07 q < 0.721 | -1.23 q < 0.467 | -1.07 q < 1      |
| Q43303    | -                                                                     | Ssc.25147.1.A1_at   | -1.1 q < 0.0409  | 1.02 q < 1       | -1.12 q < 0.657  | -1.07 q < 0.706 | -1.21 q < 0.366 | -1.12 q < 0.984  |
| CNDP1     | carnosine dipeptidase 1 (metallopeptidase M20 family)                 | Ssc.25136.2.A1_a_at | -1.18 q < 0.041  | -1.03 q < 1      | -1.25 q < 0.579  | -1.18 q < 0.568 | -1.44 q < 0.245 | -1.06 q < 1      |
| LMNA      | lamin A/C                                                             | Ssc.5112.1.S1_at    | -1.18 q < 0.0411 | 1.07 q < 1       | -1.41 q < 0.135  | 1.05 q < 0.88   | -1.21 q < 1     | -1.47 q < 0.0858 |
| ISG20L2   | interferon stimulated exonuclease gene 20kDa-like 2                   | Ssc.10835.1.A1_at   | -1.12 q < 0.0411 | -1.12 q < 1      | -1.26 q < 0.181  | -1.06 q < 0.81  | -1.1 q < 1      | -1.08 q < 1      |
| ADRM1     | adhesion regulating molecule 1                                        | Ssc.2655.1.A1_at    | 1.13 q < 0.0411  | 1.2 q < 0.647    | 1.12 q < 0.842   | 1.29 q < 0.108  | 1.03 q < 1      | 1.03 q < 1       |
| PRCC      | papillary renal cell carcinoma (translocation-associated)             | Ssc.12110.1.S1_at   | -1.1 q < 0.0412  | -1.18 q < 0.457  | -1.18 q < 0.371  | -1.01 q < 0.948 | -1.12 q < 1     | -1.03 q < 1      |
| SLC19A2   | solute carrier family 19 (thiamine transporter), member 2             | Ssc.22020.1.S1_at   | 1.15 q < 0.0412  | 1.22 q < 0.768   | 1.09 q < 0.91    | 1.23 q < 0.359  | 1.1 q < 1       | 1.14 q < 1       |
| CCL4L     | chemokine (C-C motif) ligand 4-like 1                                 | Ssc.23797.1.S1_at   | -1.19 q < 0.0413 | -1.26 q < 0.778  | -1.1 q < 0.918   | -1.02 q < 0.951 | -1.1 q < 1      | -1.5 q < 0.0764  |
| RTN4IP1   | reticulin 4 interacting protein 1                                     | Ssc.8754.1.A1_at    | 1.13 q < 0.0414  | 1.15 q < 0.932   | 1.12 q < 0.814   | 1.09 q < 0.667  | 1.09 q < 1      | 1.19 q < 0.742   |
| CHRA1     | chromatin accessibility complex 1                                     | Ssc.27571.1.S1_at   | -1.14 q < 0.0417 | -1.06 q < 1      | -1.33 q < 0.142  | -1.05 q < 0.846 | -1.13 q < 1     | -1.16 q < 1      |
| ST8SIA4   | ST8 alpha-N-acetylneuraminidase alpha-2,8-sialyltransferase 4         | Ssc.27896.1.S1_at   | -1.12 q < 0.042  | -1.04 q < 1      | -1.13 q < 0.767  | -1.11 q < 0.591 | -1.09 q < 1     | -1.25 q < 0.306  |
| ST8SIA4   | ST8 alpha-N-acetylneuraminidase alpha-2,8-sialyltransferase 4         | Ssc.11698.1.A1_at   | 1.04 q < 0.802   | -1.34 q < 0.105  | -1.06 q < 0.937  | 1.08 q < 0.745  | 1.14 q < 1      | 1.41 q < 0.0287  |
| FAM134B   | family with sequence similarity 134, member B                         | Ssc.5407.1.A1_at    | -1.36 q < 0.042  | -1.21 q < 1      | -1.61 q < 0.448  | -1.17 q < 0.782 | -1.36 q < 1     | -1.48 q < 0.92   |
| SLC39A6   | solute carrier family 39 (zinc transporter), member 6                 | Ssc.6670.1.A1_at    | -1.16 q < 0.042  | -1.24 q < 0.686  | -1.21 q < 0.641  | -1.01 q < 0.985 | -1.15 q < 1     | -1.22 q < 0.905  |
| SMC5      | structural maintenance of chromosomes 5                               | Ssc.6286.1.A1_at    | 1.15 q < 0.0425  | -1.02 q < 1      | -1.08 q < 0.923  | 1.35 q < 0.0941 | 1.24 q < 1      | 1.31 q < 0.276   |
| AFF4      | AF4/FMR2 family, member 4                                             | Ssc.13568.1.A1_at   | 1.13 q < 0.0426  | -1.01 q < 1      | -1.06 q < 0.933  | 1.32 q < 0.082  | 1.23 q < 0.785  | 1.23 q < 0.515   |
| UBASH3B   | ubiquitin associated and SH3 domain containing B                      | Ssc.25139.2.S1_at   | -1.16 q < 0.0428 | 1 q < 1          | -1.37 q < 0.156  | -1.15 q < 0.58  | -1.08 q < 1     | -1.24 q < 0.752  |
| CDC42EP5  | CDC42 effector protein (Rho GTPase binding) 5                         | Ssc.17268.1.A1_at   | -1.14 q < 0.0429 | -1.18 q < 0.858  | -1.23 q < 0.444  | -1.03 q < 0.914 | -1.05 q < 1     | -1.24 q < 0.593  |
| SSR4      | signal sequence receptor, delta (translocon-associated protein delta) | Ssc.2762.1.S1_at    | -1.19 q < 0.043  | -1.12 q < 1      | -1.28 q < 0.547  | -1.11 q < 0.745 | -1.02 q < 1     | -1.48 q < 0.128  |
| DLG3      | discs, large homolog 3 (Drosophila)                                   | Ssc.4962.1.S1_at    | -1.13 q < 0.0432 | -1.06 q < 1      | -1.27 q < 0.186  | -1.1 q < 0.648  | -1.04 q < 1     | -1.17 q < 0.876  |
| DLG3      | membrane protein, palmitoylated 3 (MAGUK p55 subfamily member 3)      | Ssc.4962.1.S1_at    | -1.13 q < 0.0432 | -1.06 q < 1      | -1.27 q < 0.186  | -1.1 q < 0.648  | -1.04 q < 1     | -1.17 q < 0.876  |

| Gene Name | Gene Description                                                                                  | Probe Set ID        | Breed MS-WC      | Day 25 MS-WC     | Day 45 MS-WC     | Day 65 MS-WC    | Day 85 MS-WC    | Day 105 MS-WC   |
|-----------|---------------------------------------------------------------------------------------------------|---------------------|------------------|------------------|------------------|-----------------|-----------------|-----------------|
| FHL1      | four and a half LIM domains 1                                                                     | Ssc.14463.1.S1_at   | -1.22 q < 0.0432 | 1.05 q < 1       | -1.24 q < 0.749  | -1.2 q < 0.587  | -1.18 q < 1     | -1.6 q < 0.0901 |
| FHL1      | complement factor H                                                                               | Ssc.14463.1.S1_at   | -1.22 q < 0.0432 | 1.05 q < 1       | -1.24 q < 0.749  | -1.2 q < 0.587  | -1.18 q < 1     | -1.6 q < 0.0901 |
| EPB41L4A  | erythrocyte membrane protein band 4.1 like 4A                                                     | Ssc.30320.1.S1_at   | 1.2 q < 0.0433   | -1 q < 1         | 1.25 q < 0.651   | 1.51 q < 0.0674 | 1.09 q < 1      | 1.18 q < 1      |
| PLXDC2    | plexin domain containing 2                                                                        | Ssc.12603.1.A1_at   | 1.33 q < 0.0437  | -1.52 q < 0.667  | 1.31 q < 0.819   | 1.83 q < 0.105  | 1.62 q < 0.758  | 1.62 q < 0.497  |
| AES       | amino-terminal enhancer of split                                                                  | Ssc.1793.1.S1_a_at  | -1.13 q < 0.0438 | 1.05 q < 1       | -1.33 q < 0.0749 | -1.03 q < 0.89  | -1.2 q < 1      | -1.16 q < 0.986 |
| AES       | amino-terminal enhancer of split                                                                  | Ssc.1793.1.S1_at    | -1.08 q < 0.479  | 1.19 q < 0.888   | -1.44 q < 0.0422 | -1.1 q < 0.724  | -1.13 q < 1     | 1.02 q < 1      |
| NUP133    | nucleoporin 133kDa                                                                                | Ssc.23133.1.A1_at   | -1.12 q < 0.0438 | -1.08 q < 1      | -1.2 q < 0.45    | -1.11 q < 0.609 | -1.06 q < 1     | -1.18 q < 0.786 |
| SMARCA4   | SWI/SNF related, matrix associated, actin dependent regulator of chromatin, subfamily a, member 4 | Ssc.26993.1.S1_at   | 1.1 q < 0.0438   | -1.03 q < 1      | 1.09 q < 0.829   | 1.17 q < 0.23   | 1.09 q < 1      | 1.17 q < 0.453  |
| WDR82     | WD repeat domain 82                                                                               | Ssc.21588.1.S1_at   | -1.08 q < 0.0438 | -1.04 q < 1      | -1.14 q < 0.338  | -1.13 q < 0.315 | -1.12 q < 1     | 1.02 q < 1      |
| WDR82     | WD repeat domain 82 pseudogene 1                                                                  | Ssc.21588.1.S1_at   | -1.08 q < 0.0438 | -1.04 q < 1      | -1.14 q < 0.338  | -1.13 q < 0.315 | -1.12 q < 1     | 1.02 q < 1      |
| TRAF3IP2  | TRAF3 interacting protein 2                                                                       | Ssc.31132.1.A1_at   | 1.15 q < 0.0441  | 1.22 q < 0.754   | 1.17 q < 0.738   | 1.26 q < 0.28   | 1.02 q < 1      | 1.12 q < 1      |
| TXNDC12   | thioredoxin domain containing 12 (endoplasmic reticulum)                                          | Ssc.5458.1.S1_at    | 1.14 q < 0.0444  | 1.12 q < 1       | -1.09 q < 0.898  | 1.27 q < 0.2    | 1.25 q < 0.823  | 1.2 q < 0.857   |
| TMEM41A   | transmembrane protein 41A                                                                         | Ssc.21284.1.S1_at   | -1.14 q < 0.0446 | -1.08 q < 1      | -1.22 q < 0.498  | -1.17 q < 0.489 | -1.17 q < 1     | -1.08 q < 1     |
| C5orf13   | chromosome 5 open reading frame 13                                                                | Ssc.20917.1.S1_at   | -1.15 q < 0.0446 | -1.25 q < 0.577  | -1.18 q < 0.708  | -1.07 q < 0.801 | -1.26 q < 0.836 | -1.02 q < 1     |
| Q96S00    | -                                                                                                 | Ssc.30151.1.A1_at   | 1.11 q < 0.0446  | -1.02 q < 1      | 1.19 q < 0.381   | 1.17 q < 0.321  | 1.11 q < 1      | 1.1 q < 1       |
| NRS5A2    | nuclear receptor subfamily 5, group A, member 2                                                   | Ssc.29813.1.A1_at   | 1.13 q < 0.0446  | 1.19 q < 0.697   | 1.04 q < 0.958   | 1.15 q < 0.49   | 1.05 q < 1      | 1.23 q < 0.507  |
| ADAM9     | ADAM metallopeptidase domain 9                                                                    | Ssc.16051.1.S1_at   | -1.28 q < 0.0447 | -1.35 q < 0.877  | -1.41 q < 0.556  | -1.11 q < 0.831 | -1.02 q < 1     | -1.58 q < 0.365 |
| CNOT8     | CCR4-NOT transcription complex, subunit 8                                                         | Ssc.5718.1.A1_at    | 1.14 q < 0.0447  | 1.21 q < 0.629   | 1.05 q < 0.953   | 1.14 q < 0.534  | 1.09 q < 1      | 1.2 q < 0.807   |
| PABPC5    | poly(A) binding protein, cytoplasmic 5                                                            | Ssc.6912.1.A1_at    | 1.1 q < 0.0448   | 1.05 q < 1       | 1.19 q < 0.283   | 1.04 q < 0.829  | 1.03 q < 1      | 1.2 q < 0.312   |
| GEM       | GTP binding protein overexpressed in skeletal muscle                                              | Ssc.639.1.A1_at     | -1.38 q < 0.0448 | -1.27 q < 1      | -1.24 q < 0.899  | -1.08 q < 0.906 | -1.71 q < 0.843 | -1.72 q < 0.529 |
| GEM       | geminin, DNA replication inhibitor                                                                | Ssc.639.1.A1_at     | -1.38 q < 0.0448 | -1.27 q < 1      | -1.24 q < 0.899  | -1.08 q < 0.906 | -1.71 q < 0.843 | -1.72 q < 0.529 |
| MINA      | MYC induced nuclear antigen                                                                       | Ssc.24089.1.S1_a_at | -1.16 q < 0.045  | -1.09 q < 1      | -1.33 q < 0.236  | 1.03 q < 0.922  | -1.2 q < 1      | -1.24 q < 0.768 |
| RFFL      | ring finger and FYVE-like domain containing 1                                                     | Ssc.28059.1.A1_at   | 1.16 q < 0.0451  | -1.03 q < 1      | 1.17 q < 0.764   | 1.4 q < 0.0723  | 1.06 q < 1      | 1.25 q < 0.683  |
| Q7Z322    | -                                                                                                 | Ssc.21860.3.A1_at   | -1.21 q < 0.0453 | -1.14 q < 1      | -1.29 q < 0.609  | -1.15 q < 0.695 | -1.4 q < 0.723  | -1.11 q < 1     |
| PLTP      | phospholipid transfer protein                                                                     | Ssc.3517.1.S1_at    | -1.3 q < 0.0456  | -1.19 q < 1      | -1.89 q < 0.0703 | -1.26 q < 0.618 | 1.05 q < 1      | -1.37 q < 1     |
| KIAA1704  | KIAA1704                                                                                          | Ssc.26671.1.A1_at   | -1.1 q < 0.0457  | -1.11 q < 0.964  | -1.18 q < 0.383  | -1.03 q < 0.859 | -1.07 q < 1     | -1.11 q < 1     |
| TXNL4B    | thioredoxin-like 4B                                                                               | Ssc.27278.1.S1_at   | -1.11 q < 0.0458 | -1.09 q < 1      | -1.25 q < 0.173  | -1.06 q < 0.779 | -1.08 q < 1     | -1.1 q < 1      |
| LARGE     | like-glycosyltransferase                                                                          | Ssc.4364.2.S1_at    | 1.13 q < 0.0466  | 1.22 q < 0.504   | 1.09 q < 0.883   | 1.23 q < 0.25   | 1.06 q < 1      | 1.05 q < 1      |
| C17orf54  | chromosome 17 open reading frame 54                                                               | Ssc.29537.1.A1_at   | 1.11 q < 0.0467  | 1.03 q < 1       | 1.2 q < 0.303    | 1.16 q < 0.354  | 1.05 q < 1      | 1.1 q < 1       |
| NIN       | ninein (GSK3B interacting protein)                                                                | Ssc.5092.1.S1_at    | -1.16 q < 0.0469 | -1.23 q < 0.773  | -1.24 q < 0.552  | -1.16 q < 0.578 | -1.28 q < 0.901 | 1.06 q < 1      |
| UROD      | uroporphyrinogen decarboxylase                                                                    | Ssc.6659.1.S1_at    | 1.18 q < 0.0469  | 1.4 q < 0.257    | -1.07 q < 0.942  | 1.31 q < 0.288  | 1.3 q < 0.955   | 1.04 q < 1      |
| C14orf132 | chromosome 14 open reading frame 132                                                              | Ssc.8453.1.A1_at    | -1.14 q < 0.0471 | -1.2 q < 0.735   | -1.09 q < 0.91   | -1.29 q < 0.155 | -1.06 q < 1     | -1.07 q < 1     |
| EBAG9     | estrogen receptor binding site associated, antigen, 9                                             | Ssc.1109.1.A1_at    | 1.17 q < 0.0471  | 1.07 q < 1       | 1.18 q < 0.777   | 1.25 q < 0.384  | 1.17 q < 1      | 1.2 q < 1       |
| RALGDS    | ral guanine nucleotide dissociation stimulator                                                    | Ssc.5618.2.S1_at    | -1.12 q < 0.0471 | -1.21 q < 0.551  | -1.14 q < 0.738  | -1.07 q < 0.758 | -1.09 q < 1     | -1.12 q < 1     |
| COX6B1    | cytochrome c oxidase subunit VIb polypeptide 1 (ubiquitous)                                       | Ssc.5315.1.S1_at    | 1.17 q < 0.0471  | 1.35 q < 0.35    | 1.07 q < 0.94    | 1.04 q < 0.907  | 1.26 q < 1      | 1.17 q < 1      |
| PLAT      | plasminogen activator, tissue                                                                     | Ssc.196.1.S1_at     | -1.29 q < 0.0472 | -1.52 q < 0.537  | -1.43 q < 0.569  | -1.44 q < 0.374 | 1.06 q < 1      | -1.23 q < 1     |
| SIGLECP3  | sialic acid binding Ig-like lectin, pseudogene 3                                                  | Ssc.14336.1.A1_at   | 1.13 q < 0.0472  | 1.06 q < 1       | 1.07 q < 0.913   | 1.22 q < 0.259  | 1.07 q < 1      | 1.22 q < 0.56   |
| B4GALT4   | UDP-Gal:betaGlcNAc beta 1,4-galactosyltransferase, polypeptide 4                                  | Ssc.17140.1.A1_at   | 1.18 q < 0.0475  | 1.44 q < 0.168   | 1.09 q < 0.933   | -1 q < 0.991    | 1.28 q < 1      | 1.16 q < 1      |
| ICA1      | islet cell autoantigen 1, 69kDa                                                                   | Ssc.15146.1.S1_at   | 1.14 q < 0.0475  | 1 q < 1          | -1.08 q < 0.917  | 1.24 q < 0.267  | 1.3 q < 0.412   | 1.27 q < 0.377  |
| Q8NAY9    | -                                                                                                 | Ssc.24083.1.A1_at   | 1.14 q < 0.0475  | 1.18 q < 0.881   | 1.13 q < 0.818   | 1.36 q < 0.0634 | 1.05 q < 1      | 1.01 q < 1      |
| Q8NAY9    | -                                                                                                 | Ssc.20188.2.S1_at   | -1.07 q < 0.595  | -1.6 q < 0.00152 | 1.09 q < 0.91    | 1 q < 0.993     | -1.02 q < 1     | 1.08 q < 1      |
| CYP7B1    | cytochrome P450, family 7, subfamily B, polypeptide 1                                             | Ssc.24330.1.S1_at   | -1.21 q < 0.0476 | -1.44 q < 0.343  | -1.17 q < 0.872  | -1.3 q < 0.406  | -1.09 q < 1     | -1.11 q < 1     |
| ISCA2     | iron-sulfur cluster assembly 2 homolog (S. cerevisiae)                                            | Ssc.28335.1.S1_at   | 1.13 q < 0.0476  | 1.06 q < 1       | -1.03 q < 0.973  | 1.19 q < 0.352  | 1.36 q < 0.0873 | 1.09 q < 1      |
| WFDC8     | WAP four-disulfide core domain 8                                                                  | Ssc.8061.1.A1_at    | 1.1 q < 0.0476   | -1.05 q < 1      | 1.19 q < 0.295   | 1.24 q < 0.0818 | 1.04 q < 1      | 1.1 q < 1       |
| CNP       | 2',3'-cyclic nucleotide 3' phosphodiesterase                                                      | Ssc.3522.2.S1_at    | 1.09 q < 0.0476  | 1.25 q < 0.0541  | 1.03 q < 0.958   | 1.1 q < 0.529   | 1.1 q < 1       | -1.01 q < 1     |
| CNP       | natriuretic peptide precursor C                                                                   | Ssc.3522.2.S1_at    | 1.09 q < 0.0476  | 1.25 q < 0.0541  | 1.03 q < 0.958   | 1.1 q < 0.529   | 1.1 q < 1       | -1.01 q < 1     |

| Gene Name | Gene Description                                                          | Probe Set ID      | Breed MS-WC      | Day 25 MS-WC       | Day 45 MS-WC      | Day 65 MS-WC       | Day 85 MS-WC      | Day 105 MS-WC        |
|-----------|---------------------------------------------------------------------------|-------------------|------------------|--------------------|-------------------|--------------------|-------------------|----------------------|
| SPG21     | spastic paraplegia 21 (autosomal recessive, Mast syndrome)                | Ssc.14218.1.S1_at | 1.14 q < 0.0477  | 1.07 q < 1         | 1.03 q < 0.981    | 1.2 q < 0.38       | 1.24 q < 0.821    | 1.16 q < 1           |
| TSPAN15   | tetraspanin 15                                                            | Ssc.19250.1.S1_at | 1.14 q < 0.0487  | 1.19 q < 0.803     | 1.12 q < 0.854    | 1.23 q < 0.305     | 1.06 q < 1        | 1.11 q < 1           |
| PPTC7     | PTC7 protein phosphatase homolog ( <i>S. cerevisiae</i> )                 | Ssc.24027.1.A1_at | 1.14 q < 0.0487  | -1.09 q < 1        | 1.14 q < 0.806    | 1.08 q < 0.743     | 1.27 q < 0.636    | 1.34 q < 0.137       |
| STX4      | syntaxin 4                                                                | Ssc.19737.1.S1_at | 1.11 q < 0.0487  | 1.04 q < 1         | 1.01 q < 0.993    | 1.21 q < 0.199     | 1.27 q < 0.215    | 1.04 q < 1           |
| GTPBP1    | GTP binding protein 1                                                     | Ssc.24003.1.S1_at | 1.11 q < 0.0493  | 1.13 q < 0.957     | -1.05 q < 0.935   | 1.29 q < 0.0505    | 1.09 q < 1        | 1.12 q < 1           |
| ROBO1     | roundabout, axon guidance receptor, homolog 1 ( <i>Drosophila</i> )       | Ssc.12138.1.A1_at | -1.25 q < 0.0493 | -1.74 q < 0.0818   | -1.16 q < 0.908   | -1.26 q < 0.548    | -1.01 q < 1       | -1.2 q < 1           |
| YRDC      | yrdC domain containing (E. coli)                                          | Ssc.4998.1.A1_at  | -1.11 q < 0.0493 | -1.13 q < 0.967    | -1.11 q < 0.78    | -1.14 q < 0.431    | -1.1 q < 1        | -1.06 q < 1          |
| KIF5C     | kinesin family member 5C                                                  | Ssc.28310.1.S1_at | -1.21 q < 0.0496 | 1.07 q < 1         | -1.44 q < 0.271   | -1.26 q < 0.476    | -1.4 q < 0.747    | -1.11 q < 1          |
| FBLN2     | fibulin 2                                                                 | Ssc.4479.1.S1_at  | -1.21 q < 0.0497 | -1.05 q < 1        | -1.31 q < 0.552   | -1.29 q < 0.395    | -1.08 q < 1       | -1.34 q < 0.672      |
| O00172    | -                                                                         | Ssc.4658.1.A1_at  | -1.1 q < 0.0497  | -1.13 q < 0.886    | -1.17 q < 0.402   | 1.1 q < 0.576      | -1.29 q < 0.0601  | -1.04 q < 1          |
| QSOX2     | quiescin Q6 sulfhydryl oxidase 2                                          | Ssc.1614.1.A1_at  | -1.12 q < 0.0498 | -1.05 q < 1        | -1.15 q < 0.658   | -1.14 q < 0.488    | -1.14 q < 1       | -1.11 q < 1          |
| SLC37A1   | solute carrier family 37 (glycerol-3-phosphate transporter), member 1     | Ssc.24911.1.S1_at | 1.18 q < 0.05    | -1.04 q < 1        | 1.11 q < 0.903    | 1.46 q < 0.071     | 1.27 q < 1        | 1.14 q < 1           |
| MYH14     | myosin, heavy chain 14, non-muscle                                        | Ssc.12157.1.A1_at | 1.21 q < 0.0506  | -1.13 q < 1        | 1.07 q < 0.956    | 1.79 q < 0.00581   | 1.1 q < 1         | 1.37 q < 0.536       |
| MYH14     | myosin, heavy chain 7B, cardiac muscle, beta                              | Ssc.12157.1.A1_at | 1.21 q < 0.0506  | -1.13 q < 1        | 1.07 q < 0.956    | 1.79 q < 0.00581   | 1.1 q < 1         | 1.37 q < 0.536       |
| TGFB2     | transforming growth factor, beta 2                                        | Ssc.9975.1.A1_at  | 1.13 q < 0.0509  | 1.12 q < 1         | -1.01 q < 0.996   | 1.49 q < 0.00188   | -1.19 q < 1       | 1.3 q < 0.178        |
| FLNA      | filamin A, alpha                                                          | Ssc.21758.1.S1_at | -1.12 q < 0.0517 | 1.1 q < 1          | -1.36 q < 0.0367  | -1.14 q < 0.493    | -1.09 q < 1       | -1.15 q < 1          |
| NUFIP2    | nuclear fragile X mental retardation protein interacting protein 2        | Ssc.7387.1.A1_at  | -1.13 q < 0.0521 | -1.21 q < 0.644    | -1.4 q < 0.0344   | -1.05 q < 0.86     | -1.05 q < 1       | -1 q < 1             |
| PLCZ1     | phospholipase C, zeta 1                                                   | Ssc.17349.1.S1_at | 1.1 q < 0.0527   | -1.07 q < 1        | 1.08 q < 0.863    | 1.5 q < 0.0000401  | -1.01 q < 1       | 1.08 q < 1           |
| TSPAN12   | tetraspanin 12                                                            | Ssc.6783.1.S1_at  | 1.25 q < 0.0533  | 1.35 q < 0.819     | 1.03 q < 0.989    | 1.83 q < 0.0239    | 1.07 q < 1        | 1.11 q < 1           |
| HMBS      | hydroxymethylbilane synthase                                              | Ssc.11878.1.S1_at | 1.18 q < 0.0534  | 1.61 q < 0.0185    | 1.02 q < 0.988    | 1.14 q < 0.669     | 1.22 q < 1        | -1.01 q < 1          |
| DENND1A   | DENN/MADD domain containing 1A                                            | Ssc.1929.1.S1_at  | 1.14 q < 0.0535  | 1.06 q < 1         | 1.12 q < 0.853    | 1.04 q < 0.874     | 1.09 q < 1        | 1.4 q < 0.0491       |
| COG7      | component of oligomeric golgi complex 7                                   | Ssc.19030.1.S1_at | 1.13 q < 0.0536  | 1.16 q < 0.927     | -1.07 q < 0.923   | 1.42 q < 0.0165    | 1.16 q < 1        | 1.04 q < 1           |
| RBL2      | retinoblastoma-like 2 (p130)                                              | Ssc.10727.1.A1_at | 1.12 q < 0.0536  | 1.11 q < 1         | 1.01 q < 0.996    | 1.35 q < 0.0415    | 1.04 q < 1        | 1.15 q < 1           |
| TPH2      | tryptophan hydroxylase 2                                                  | Ssc.28909.3.A1_at | 1.17 q < 0.0536  | -1.17 q < 1        | -1.01 q < 0.997   | 2.06 q < 0.0000068 | 1.02 q < 1        | 1.25 q < 0.855       |
| TPH2      | tryptophan 2,3-dioxygenase                                                | Ssc.28909.3.A1_at | 1.17 q < 0.0536  | -1.17 q < 1        | -1.01 q < 0.997   | 2.06 q < 0.0000068 | 1.02 q < 1        | 1.25 q < 0.855       |
| SLC25A20  | solute carrier family 25 (carnitine/acylcarnitine translocase), member 20 | Ssc.19212.1.S1_at | 1.16 q < 0.0553  | 1.27 q < 0.621     | -1.11 q < 0.896   | 1.53 q < 0.0204    | 1.14 q < 1        | 1.07 q < 1           |
| PCDH9     | protocadherin 9                                                           | Ssc.19564.1.S1_at | -1.21 q < 0.0554 | -1.7 q < 0.0431    | -1.6 q < 0.0874   | 1.24 q < 0.524     | -1.38 q < 0.921   | 1.14 q < 1           |
| RPA1      | replication protein A1, 70kDa                                             | Ssc.4633.1.A1_at  | -1.15 q < 0.0563 | -1.12 q < 1        | -1.44 q < 0.0387  | -1.08 q < 0.782    | -1.13 q < 1       | -1 q < 1             |
| RPA1      | polymerase (RNA) I polypeptide A, 194kDa                                  | Ssc.4633.1.A1_at  | -1.15 q < 0.0563 | -1.12 q < 1        | -1.44 q < 0.0387  | -1.08 q < 0.782    | -1.13 q < 1       | -1 q < 1             |
| CYBB      | cytochrome b-245, beta polypeptide                                        | Ssc.151.1.S1_at   | -1.17 q < 0.0567 | -1.05 q < 1        | -1.08 q < 0.938   | 1.09 q < 0.766     | -1.02 q < 1       | -2.04 q < 0.00000379 |
| FCER1G    | Fc fragment of IgE, high affinity I, receptor for; gamma polypeptide      | Ssc.508.1.S1_at   | -1.16 q < 0.0567 | 1.04 q < 1         | -1.11 q < 0.9     | 1.01 q < 0.976     | -1.1 q < 1        | -1.84 q < 0.000141   |
| BUB1B     | budding uninhibited by benzimidazoles 1 homolog beta (yeast)              | Ssc.7190.1.S1_at  | 1.13 q < 0.0571  | 1.59 q < 0.000441  | 1.05 q < 0.945    | 1.02 q < 0.941     | 1.09 q < 1        | -1.02 q < 1          |
| PTPRA     | protein tyrosine phosphatase, receptor type, A                            | Ssc.6553.1.A1_at  | 1.11 q < 0.0573  | -1.07 q < 1        | -1.04 q < 0.954   | 1.18 q < 0.331     | 1.55 q < 0.000232 | 1.05 q < 1           |
| PTPRA     | protein tyrosine phosphatase, receptor type, A                            | Ssc.6553.2.S1_at  | 1.15 q < 0.06    | 1.01 q < 1         | -1.04 q < 0.961   | 1.28 q < 0.234     | 1.52 q < 0.0169   | 1.05 q < 1           |
| EAF2      | ELL associated factor 2                                                   | Ssc.10498.1.A1_at | 1.14 q < 0.0586  | 1.08 q < 1         | 1.02 q < 0.989    | 1.45 q < 0.0161    | 1.21 q < 1        | -1.01 q < 1          |
| EAF2      | DNA methyltransferase 1 associated protein 1                              | Ssc.10498.1.A1_at | 1.14 q < 0.0586  | 1.08 q < 1         | 1.02 q < 0.989    | 1.45 q < 0.0161    | 1.21 q < 1        | -1.01 q < 1          |
| OCA2      | oculocutaneous albinism II                                                | Ssc.15775.1.S1_at | 1.13 q < 0.0598  | 1.46 q < 0.0149    | 1.02 q < 0.988    | 1.22 q < 0.317     | -1.02 q < 1       | 1.04 q < 1           |
| ARRDC4    | arrestin domain containing 4                                              | Ssc.17005.1.A1_at | -1.14 q < 0.0599 | -1.63 q < 0.000952 | -1.02 q < 0.989   | -1.11 q < 0.678    | 1.13 q < 1        | -1.2 q < 0.926       |
| EDF1      | endothelial differentiation-related factor 1                              | Ssc.4961.1.S1_at  | -1.12 q < 0.0599 | -1.02 q < 1        | -1.45 q < 0.00489 | -1.07 q < 0.755    | 1.01 q < 1        | -1.12 q < 1          |
| IGF1      | insulin-like growth factor 1 (somatomedin C)                              | Ssc.12578.1.A1_at | -1.17 q < 0.061  | -1.13 q < 1        | -1.08 q < 0.937   | -1 q < 0.993       | -1.02 q < 1       | -1.77 q < 0.0012     |
| TYROBP    | TYRO protein tyrosine kinase binding protein                              | Ssc.507.1.A1_at   | -1.19 q < 0.064  | 1 q < 1            | -1.13 q < 0.899   | -1.15 q < 0.669    | -1.05 q < 1       | -1.74 q < 0.00852    |
| SCD       | stearoyl-CoA desaturase (delta-9-desaturase)                              | Ssc.16159.1.S1_at | 1.31 q < 0.0652  | 2.11 q < 0.0451    | -1.1 q < 0.958    | 1.57 q < 0.289     | 1.18 q < 1        | 1.07 q < 1           |
| SCD       | solute carrier family 22 (organic cation/carnitine transporter), member 5 | Ssc.16159.1.S1_at | 1.31 q < 0.0652  | 2.11 q < 0.0451    | -1.1 q < 0.958    | 1.57 q < 0.289     | 1.18 q < 1        | 1.07 q < 1           |



| Gene Name | Gene Description                                                          | Probe Set ID        | Breed MS-WC      | Day 25 MS-WC      | Day 45 MS-WC       | Day 65 MS-WC       | Day 85 MS-WC      | Day 105 MS-WC      |
|-----------|---------------------------------------------------------------------------|---------------------|------------------|-------------------|--------------------|--------------------|-------------------|--------------------|
| CDS2      | CDP-diacylglycerol synthase (phosphatidate cytidylyltransferase) 2        | Ssc.26359.1.S1_a_at | 1.11 q < 0.0661  | 1.27 q < 0.173    | -1.1 q < 0.845     | 1.31 q < 0.0456    | -1.06 q < 1       | 1.18 q < 0.706     |
| IGKC      | immunoglobulin kappa constant                                             | Ssc.15778.1.S1_s_at | -1.14 q < 0.0663 | -1.06 q < 1       | 1.04 q < 0.972     | -1.05 q < 0.857    | 1.01 q < 1        | -1.83 q < 0.000167 |
| SCARA5    | scavenger receptor class A, member 5 (putative)                           | Ssc.6512.1.S1_at    | -1.36 q < 0.0668 | -3.04 q < 0.00137 | -1.26 q < 0.885    | -1.26 q < 0.689    | 1.12 q < 1        | -1.05 q < 1        |
| SCD5      | stearoyl-CoA desaturase 5                                                 | Ssc.11708.1.A1_at   | 1.1 q < 0.0676   | -1.03 q < 1       | 1.06 q < 0.913     | 1.3 q < 0.0266     | 1.05 q < 1        | 1.14 q < 0.937     |
| LLGL2     | lethal giant larvae homolog 2 (Drosophila)                                | Ssc.22143.1.S1_at   | 1.16 q < 0.0685  | 1.04 q < 1        | 1.04 q < 0.971     | 1.48 q < 0.0493    | 1.21 q < 1        | 1.11 q < 1         |
| ADAMTS12  | ADAM metalloproteinase with thrombospondin type 1 motif, 12               | Ssc.18282.1.S1_at   | -1.19 q < 0.0686 | -1.73 q < 0.0131  | -1.14 q < 0.898    | 1.11 q < 0.763     | -1.08 q < 1       | -1.26 q < 0.983    |
| RERE      | arginine-glutamic acid dipeptide (RE) repeats                             | Ssc.15512.1.S1_at   | 1.14 q < 0.0686  | 1.06 q < 1        | -1.06 q < 0.948    | 1.47 q < 0.0212    | 1.09 q < 1        | 1.21 q < 0.855     |
| MORF4L1   | mortality factor 4 like 1                                                 | Ssc.1195.1.S1_at    | -1.41 q < 0.0686 | -2.63 q < 0.0439  | -1.21 q < 0.93     | 1.06 q < 0.947     | -1.17 q < 1       | -1.59 q < 0.949    |
| COX4NB    | COX4 neighbor                                                             | Ssc.17265.1.S1_at   | -1.13 q < 0.0691 | 1.03 q < 1        | -1.42 q < 0.031    | -1.13 q < 0.592    | -1.04 q < 1       | -1.14 q < 1        |
| LPL       | lipoprotein lipase                                                        | Ssc.1147.2.S1_at    | 1.21 q < 0.0699  | 1.04 q < 1        | 1.71 q < 0.0321    | 1.01 q < 0.991     | 1.2 q < 1         | 1.2 q < 1          |
| SLC2A14   | solute carrier family 2 (facilitated glucose transporter), member 14      | Ssc.1674.1.A1_at    | 1.25 q < 0.0701  | 2.33 q < 0.000664 | -1.09 q < 0.953    | 1.46 q < 0.278     | -1.02 q < 1       | -1.02 q < 1        |
| KIAA1754  | inositol 1,4,5-triphosphate receptor interacting protein                  | Ssc.18178.2.S1_at   | 1.1 q < 0.0701   | 1.17 q < 0.693    | -1.04 q < 0.951    | 1.49 q < 0.000159  | -1.07 q < 1       | 1.04 q < 1         |
| PRLR      | prolactin receptor                                                        | Ssc.24638.1.S1_at   | -1.23 q < 0.0704 | -1.04 q < 1       | -1.1 q < 0.943     | -1.04 q < 0.931    | -1.83 q < 0.0488  | -1.31 q < 1        |
| SLC39A11  | solute carrier family 39 (metal ion transporter), member 11               | Ssc.24311.1.S1_at   | -1.14 q < 0.0706 | -1.03 q < 1       | -1.76 q < 0.000054 | -1.07 q < 0.814    | -1.02 q < 1       | 1.03 q < 1         |
| SNX24     | sorting nexin 24                                                          | Ssc.8604.1.A1_at    | -1.12 q < 0.0706 | -1.25 q < 0.368   | -1.49 q < 0.00306  | 1.06 q < 0.801     | 1.04 q < 1        | -1.05 q < 1        |
| PPM1H     | protein phosphatase, Mg2+/Mn2+ dependent, 1H                              | Ssc.18826.1.A1_at   | 1.1 q < 0.0708   | 1.02 q < 1        | 1.08 q < 0.878     | 1.14 q < 0.43      | -1.02 q < 1       | 1.32 q < 0.0334    |
| LRRC4C    | leucine rich repeat containing 4C                                         | Ssc.18072.1.A1_at   | -1.12 q < 0.0708 | -1.47 q < 0.00481 | -1.06 q < 0.933    | -1.04 q < 0.871    | -1.06 q < 1       | -1.02 q < 1        |
| LRRC4C    | leucine rich repeat containing 4C                                         | Ssc.25264.2.S1_a_at | 1.13 q < 0.0857  | -1.02 q < 1       | 1.12 q < 0.869     | -1.04 q < 0.882    | 1.1 q < 1         | 1.64 q < 0.000877  |
| CPT1A     | carnitine palmitoyltransferase 1A (liver)                                 | Ssc.8974.1.S1_at    | 1.2 q < 0.0713   | 1.08 q < 1        | 1.14 q < 0.903     | 1.67 q < 0.0321    | 1.17 q < 1        | 1.05 q < 1         |
| PDAP1     | PDGFA associated protein 1                                                | Ssc.25607.1.S1_at   | -1.11 q < 0.0714 | -1 q < 1          | -1.41 q < 0.00715  | 1.01 q < 0.979     | -1.13 q < 1       | -1.07 q < 1        |
| FAM65B    | family with sequence similarity 65, member B                              | Ssc.15335.1.S1_at   | 1.15 q < 0.0731  | 1.64 q < 0.00197  | 1.15 q < 0.804     | 1.05 q < 0.874     | 1.12 q < 1        | -1.13 q < 1        |
| BRCA1     | breast cancer 1, early onset                                              | Ssc.29471.1.A1_at   | 1.09 q < 0.0741  | 1.11 q < 0.994    | 1.04 q < 0.946     | 1.29 q < 0.0321    | 1.02 q < 1        | 1.04 q < 1         |
| DDX46     | DEAD (Asp-Glu-Ala-Asp) box polypeptide 46                                 | Ssc.8127.1.A1_at    | 1.14 q < 0.0755  | 1.1 q < 1         | 1 q < 0.997        | 1.42 q < 0.0356    | 1.08 q < 1        | 1.12 q < 1         |
| TNNI1     | troponin I type 1 (skeletal, slow)                                        | Ssc.2609.1.S1_at    | 1.11 q < 0.0764  | 1.45 q < 0.0018   | 1 q < 1            | 1.12 q < 0.557     | -1.01 q < 1       | 1.04 q < 1         |
| ZFP106    | zinc finger protein 106 homolog (mouse)                                   | Ssc.13616.2.S1_at   | -1.12 q < 0.0768 | -1.47 q < 0.00542 | -1.13 q < 0.806    | -1.06 q < 0.817    | 1 q < 1           | -1 q < 1           |
| STAT1     | signal transducer and activator of transcription 1, 91kDa                 | Ssc.6025.2.A1_at    | -1.21 q < 0.0775 | 1.08 q < 1        | -1.38 q < 0.459    | -1.03 q < 0.948    | -1.14 q < 1       | -1.7 q < 0.0445    |
| NFIA      | nuclear factor I/A                                                        | Ssc.30335.1.A1_at   | 1.1 q < 0.0778   | -1 q < 1          | 1.11 q < 0.793     | 1.33 q < 0.0123    | 1.03 q < 1        | 1.05 q < 1         |
| C17orf85  | chromosome 17 open reading frame 85                                       | Ssc.16988.1.S1_at   | -1.09 q < 0.0823 | 1.01 q < 1        | -1.22 q < 0.166    | -1 q < 0.988       | -1.32 q < 0.0193  | 1.03 q < 1         |
| JMJD1A    | lysine (K)-specific demethylase 3A                                        | Ssc.30856.1.A1_s_at | 1.1 q < 0.083    | 1.24 q < 0.252    | -1.08 q < 0.893    | 1.36 q < 0.0124    | -1.07 q < 1       | 1.12 q < 1         |
| FAM46A    | family with sequence similarity 46, member A                              | Ssc.10756.1.A1_at   | -1.11 q < 0.0831 | -1.38 q < 0.0285  | 1.04 q < 0.961     | -1.07 q < 0.752    | -1.15 q < 1       | -1.05 q < 1        |
| FAM46A    | family with sequence similarity 46, member A                              | Ssc.15332.1.S1_at   | -1.17 q < 0.279  | -1.98 q < 0.00965 | 1.05 q < 0.975     | -1.04 q < 0.938    | -1.07 q < 1       | -1.05 q < 1        |
| DHCR7     | 7-dehydrocholesterol reductase                                            | Ssc.5455.1.S1_at    | -1.23 q < 0.0838 | 1.25 q < 1        | -1.39 q < 0.516    | -1.87 q < 0.0153   | -1.1 q < 1        | -1.21 q < 1        |
| HM13      | histocompatibility (minor) 13                                             | Ssc.4188.1.S1_at    | 1.14 q < 0.0838  | -1.16 q < 1       | 1.02 q < 0.988     | 1.77 q < 0.000104  | 1.14 q < 1        | 1.09 q < 1         |
| ODZ1      | odz, odd Oz/ten-m homolog 1(Drosophila)                                   | Ssc.25498.1.S1_at   | 1.09 q < 0.0843  | 1.04 q < 1        | 1.05 q < 0.925     | 1.29 q < 0.015     | 1.06 q < 1        | 1.01 q < 1         |
| C1orf26   | chromosome 1 open reading frame 26                                        | Ssc.8707.1.A1_at    | 1.12 q < 0.0846  | 1.04 q < 1        | -1.01 q < 0.996    | 1.59 q < 0.00017   | -1.02 q < 1       | 1.07 q < 1         |
| STXBP3    | syntaxin binding protein 3                                                | Ssc.30767.1.A1_at   | 1.15 q < 0.0855  | 1.04 q < 1        | -1.09 q < 0.917    | 1.55 q < 0.0126    | 1.13 q < 1        | 1.2 q < 1          |
| LRP11     | low density lipoprotein receptor-related protein 11                       | Ssc.14282.1.A1_at   | -1.1 q < 0.0867  | -1.11 q < 1       | -1.36 q < 0.0174   | 1.03 q < 0.876     | -1.03 q < 1       | -1.08 q < 1        |
| C6orf204  | chromosome 6 open reading frame 204                                       | Ssc.16987.1.A1_at   | 1.2 q < 0.0869   | 1.08 q < 1        | -1.06 q < 0.969    | 1.07 q < 0.863     | 2.23 q < 0.000111 | 1 q < 1            |
| HUNK      | hormonally up-regulated Neu-associated kinase                             | Ssc.30233.1.A1_at   | 1.18 q < 0.0872  | -1 q < 1          | 1.26 q < 0.662     | 1.05 q < 0.889     | 1.05 q < 1        | 1.66 q < 0.0252    |
| HUNK      | hormonally up-regulated Neu-associated kinase                             | Ssc.27274.1.S1_at   | -1 q < 0.996     | -1.07 q < 1       | -1.49 q < 0.0461   | 1.44 q < 0.063     | 1.1 q < 1         | -1.01 q < 1        |
| AHNAK     | AHNAK nucleoprotein                                                       | Ssc.27526.1.S1_at   | -1.2 q < 0.0884  | -1.11 q < 1       | -1.44 q < 0.317    | -1.73 q < 0.0219   | 1.34 q < 1        | -1.21 q < 1        |
| AHNAK     | AHNAK nucleoprotein                                                       | Ssc.16645.1.S1_at   | -1.13 q < 0.289  | 1.03 q < 1        | -1.48 q < 0.127    | -1.56 q < 0.0425   | 1.4 q < 0.541     | -1.15 q < 1        |
| C21orf33  | chromosome 21 open reading frame 33                                       | Ssc.21850.1.S1_at   | -1.11 q < 0.0947 | -1.04 q < 1       | -1.37 q < 0.0202   | -1 q < 0.988       | -1.04 q < 1       | -1.11 q < 1        |
| STAR3     | STAR-related lipid transfer (START) domain containing 3                   | Ssc.4484.1.S1_at    | -1.1 q < 0.096   | -1.03 q < 1       | -1.35 q < 0.0311   | 1.07 q < 0.739     | -1.12 q < 1       | -1.13 q < 1        |
| ALS2CR4   | amyotrophic lateral sclerosis 2 (juvenile) chromosome region, candidate 4 | Ssc.9901.1.A1_at    | 1.17 q < 0.096   | 1.14 q < 1        | -1.31 q < 0.494    | 2.13 q < 0.0000246 | 1.02 q < 1        | 1.18 q < 1         |
| DHRS12    | dehydrogenase/reductase (SDR family) member 12                            | Ssc.21893.1.S1_at   | -1.11 q < 0.0981 | -1.14 q < 0.984   | -1.45 q < 0.00515  | 1.01 q < 0.977     | -1.02 q < 1       | -1.01 q < 1        |

| Gene Name | Gene Description                                                     | Probe Set ID        | Breed MS-WC      | Day 25 MS-WC      | Day 45 MS-WC      | Day 65 MS-WC     | Day 85 MS-WC    | Day 105 MS-WC      |
|-----------|----------------------------------------------------------------------|---------------------|------------------|-------------------|-------------------|------------------|-----------------|--------------------|
| TMEM119   | transmembrane protein 119                                            | Ssc.1526.1.S1_at    | -1.15 q < 0.0994 | -1.57 q < 0.0216  | -1.12 q < 0.894   | -1.16 q < 0.601  | 1.13 q < 1      | -1.13 q < 1        |
| C6orf115  | chromosome 6 open reading frame 115                                  | Ssc.20225.1.A1_at   | -1.2 q < 0.0995  | 1.03 q < 1        | -1.21 q < 0.83    | -1.12 q < 0.781  | -1.08 q < 1     | -1.77 q < 0.0274   |
| CD81      | CD81 molecule                                                        | Ssc.1641.1.S1_at    | -1.17 q < 0.1    | -1.12 q < 1       | -1.58 q < 0.0469  | -1.04 q < 0.914  | -1.13 q < 1     | -1.06 q < 1        |
| TMEM47    | transmembrane protein 47                                             | Ssc.8464.1.A1_at    | -1.15 q < 0.1    | -1.72 q < 0.00146 | -1.07 q < 0.94    | -1.02 q < 0.964  | -1.12 q < 1     | 1.05 q < 1         |
| SLC36A2   | solute carrier family 36 (proton/amino acid symporter), member 2     | Ssc.4529.1.S1_at    | 1.24 q < 0.102   | 1.2 q < 1         | 2.34 q < 0.00114  | 1.32 q < 0.496   | -1.24 q < 1     | -1.03 q < 1        |
| SLC36A2   | solute carrier family 36 (proton/amino acid symporter), member 2     | Ssc.14211.1.A1_at   | 1.11 q < 0.142   | 1.01 q < 1        | 1.8 q < 0.0000024 | 1.22 q < 0.322   | -1.2 q < 1      | -1.08 q < 1        |
| CCL8      | chemokine (C-C motif) ligand 8                                       | Ssc.9957.1.A1_at    | -1.23 q < 0.102  | -1.13 q < 1       | -1.06 q < 0.973   | -1.02 q < 0.973  | 1.02 q < 1      | -2.3 q < 0.000666  |
| HPR       | haptoglobin-related protein                                          | Ssc.37.1.S1_at      | -1.61 q < 0.104  | 1.1 q < 1         | -1.02 q < 0.997   | -1.2 q < 0.866   | -2.17 q < 1     | -4.49 q < 0.025    |
| ASF1A     | ASF1 anti-silencing function 1 homolog A (S. cerevisiae)             | Ssc.8605.1.A1_s_at  | 1.11 q < 0.104   | 1.22 q < 0.468    | -1.01 q < 0.995   | 1.36 q < 0.0233  | 1.02 q < 1      | -1.01 q < 1        |
| HPSE      | heparanase                                                           | Ssc.7093.2.S1_at    | 1.17 q < 0.105   | 1.02 q < 1        | 1.08 q < 0.943    | 1.06 q < 0.865   | 1.64 q < 0.0379 | 1.14 q < 1         |
| SPI1      | spleen focus forming virus (SFFV) proviral integration oncogene spi1 | Ssc.20177.1.S1_at   | -1.14 q < 0.107  | -1.05 q < 1       | -1.09 q < 0.926   | -1.04 q < 0.895  | -1.07 q < 1     | -1.54 q < 0.0227   |
| SUCLA2    | succinate-CoA ligase, ADP-forming, beta subunit                      | Ssc.68.1.A1_at      | -1.19 q < 0.107  | -1.01 q < 1       | -1.69 q < 0.0414  | 1.07 q < 0.86    | -1.19 q < 1     | -1.28 q < 1        |
| PPARD     | peroxisome proliferator-activated receptor delta                     | Ssc.3251.1.A1_at    | 1.1 q < 0.108    | -1.02 q < 1       | 1.14 q < 0.698    | 1.32 q < 0.0371  | 1.03 q < 1      | 1.06 q < 1         |
| CXCR4     | chemokine (C-X-C motif) receptor 4                                   | Ssc.7176.1.A1_at    | 1.2 q < 0.109    | 1.02 q < 1        | -1.15 q < 0.9     | 1.07 q < 0.883   | 1.13 q < 1      | 2.35 q < 0.0000536 |
| AHCY      | adenosylhomocysteinase                                               | Ssc.25314.1.S1_a_at | 1.14 q < 0.109   | 1.68 q < 0.00125  | -1.04 q < 0.973   | 1.06 q < 0.852   | 1.16 q < 1      | -1.04 q < 1        |
| PIK3C2B   | phosphoinositide-3-kinase, class 2, beta polypeptide                 | Ssc.3244.1.S1_at    | -1.13 q < 0.11   | 1.05 q < 1        | -1.23 q < 0.539   | -1.42 q < 0.0493 | -1.11 q < 1     | -1.02 q < 1        |
| SLC35F2   | solute carrier family 35, member F2                                  | Ssc.4329.1.S1_at    | 1.12 q < 0.11    | 1 q < 1           | 1.07 q < 0.933    | 1.51 q < 0.00482 | 1.02 q < 1      | 1.08 q < 1         |
| EEF2      | eukaryotic translation elongation factor 2                           | Ssc.965.1.S1_at     | -1.08 q < 0.111  | -1 q < 1          | -1.27 q < 0.025   | 1.02 q < 0.913   | -1.03 q < 1     | -1.14 q < 0.734    |
| COL21A1   | collagen, type XXI, alpha 1                                          | Ssc.24436.1.A1_at   | 1.09 q < 0.112   | 1.02 q < 1        | 1.1 q < 0.796     | 1.27 q < 0.0493  | 1.01 q < 1      | 1.05 q < 1         |
| SLC19A1   | solute carrier family 19 (folate transporter), member 1              | Ssc.3044.1.S1_at    | 1.18 q < 0.113   | 1.07 q < 1        | -1.17 q < 0.865   | 1.61 q < 0.0448  | 1.2 q < 1       | 1.31 q < 0.844     |
| CDH13     | cadherin 13, H-cadherin (heart)                                      | Ssc.12939.1.S1_at   | -1.13 q < 0.113  | -1.12 q < 1       | -1.48 q < 0.0274  | -1.33 q < 0.141  | -1.06 q < 1     | 1.25 q < 0.634     |
| PDK4      | pyruvate dehydrogenase kinase, isozyme 4                             | Ssc.1121.1.S1_at    | -1.15 q < 0.115  | -1.03 q < 1       | -1.54 q < 0.0297  | 1.11 q < 0.731   | -1.29 q < 1     | -1.08 q < 1        |
| UTRN      | utrophin                                                             | Ssc.24741.1.A1_at   | 1.12 q < 0.115   | 1.57 q < 0.00108  | -1.04 q < 0.969   | 1.09 q < 0.713   | 1.07 q < 1      | -1.02 q < 1        |
| FKBP8     | FK506 binding protein 8, 38kDa                                       | Ssc.16869.1.S1_at   | 1.09 q < 0.115   | 1.14 q < 0.82     | -1.12 q < 0.739   | 1.31 q < 0.0241  | 1.15 q < 1      | 1.01 q < 1         |
| EEF1A2    | eukaryotic translation elongation factor 1 alpha 2                   | Ssc.17324.1.A1_at   | -1.22 q < 0.117  | -1 q < 1          | 1.08 q < 0.956    | -1.29 q < 0.523  | -1.2 q < 1      | -1.89 q < 0.0257   |
| OLFM1     | olfactomedin 1                                                       | Ssc.17449.1.S1_at   | 1.09 q < 0.119   | 1.46 q < 0.000507 | 1.13 q < 0.708    | 1.01 q < 0.956   | -1.02 q < 1     | -1.05 q < 1        |
| RAG1AP1   | recombination activating gene 1 activating protein 1                 | Ssc.18227.1.S1_a_at | -1.09 q < 0.119  | 1.05 q < 1        | -1.28 q < 0.0406  | -1.06 q < 0.756  | -1.06 q < 1     | -1.09 q < 1        |
| CN158086  | -                                                                    | Ssc.26710.1.S1_at   | 1.1 q < 0.12     | -1.1 q < 1        | 1.02 q < 0.983    | 1.21 q < 0.269   | -1.03 q < 1     | 1.5 q < 0.00103    |
| PTH1R     | parathyroid hormone 1 receptor                                       | Ssc.14485.1.S1_at   | 1.11 q < 0.121   | 1.19 q < 0.767    | -1.06 q < 0.938   | -1.08 q < 0.754  | 1.13 q < 1      | 1.45 q < 0.0116    |
| COG3      | component of oligomeric golgi complex 3                              | Ssc.2241.1.A1_at    | 1.15 q < 0.121   | -1.08 q < 1       | 1.13 q < 0.884    | 1.5 q < 0.0396   | 1.08 q < 1      | 1.18 q < 1         |
| C9orf58   | allograft inflammatory factor 1-like                                 | Ssc.21247.2.S1_a_at | -1.13 q < 0.124  | 1 q < 1           | -1.48 q < 0.0258  | -1.31 q < 0.183  | 1.05 q < 1      | 1.01 q < 1         |
| RAB8A     | RAB8A, member RAS oncogene family                                    | Ssc.24907.1.S1_at   | -1.13 q < 0.126  | -1.05 q < 1       | -1.49 q < 0.0188  | 1.12 q < 0.659   | -1.01 q < 1     | -1.28 q < 0.479    |
| DALRD3    | DALR anticodon binding domain containing 3                           | Ssc.12434.2.S1_a_at | -1.12 q < 0.126  | 1.01 q < 1        | -1.45 q < 0.0192  | -1.12 q < 0.612  | -1 q < 1        | -1.08 q < 1        |
| PLAUR     | plasminogen activator, urokinase receptor                            | Ssc.10351.1.A1_at   | 1.15 q < 0.128   | -1.11 q < 1       | 1.26 q < 0.537    | 1.57 q < 0.0153  | 1.12 q < 1      | -1.01 q < 1        |
| FAM78B    | family with sequence similarity 78, member B                         | Ssc.9663.1.A1_at    | 1.1 q < 0.13     | -1.08 q < 1       | 1.01 q < 0.997    | 1.38 q < 0.0222  | 1.08 q < 1      | 1.19 q < 0.753     |
| LAP3      | leucine aminopeptidase 3                                             | Ssc.8775.3.S1_at    | -1.14 q < 0.13   | 1.07 q < 1        | -1.57 q < 0.0121  | -1.02 q < 0.948  | 1.01 q < 1      | -1.28 q < 0.619    |
| LAP3      | leucine aminopeptidase 3                                             | Ssc.7713.1.A1_at    | -1.1 q < 0.31    | 1.1 q < 1         | -1.64 q < 0.00066 | 1.1 q < 0.708    | 1.02 q < 1      | -1.19 q < 0.934    |
| C4BPA     | complement component 4 binding protein, alpha                        | Ssc.11162.1.S1_at   | -1.11 q < 0.131  | -1.06 q < 1       | -1.01 q < 0.992   | -1.03 q < 0.914  | 1.02 q < 1      | -1.57 q < 0.000898 |
| NDUFA2    | NADH dehydrogenase (ubiquinone) 1 alpha subcomplex, 2, 8kDa          | Ssc.8894.1.A1_at    | 1.09 q < 0.131   | 1.01 q < 1        | -1.03 q < 0.973   | 1.39 q < 0.00463 | 1.03 q < 1      | 1.1 q < 1          |
| SNF1LK2   | salt-inducible kinase 2                                              | Ssc.13078.1.A1_at   | 1.14 q < 0.133   | 1.2 q < 0.918     | -1.13 q < 0.859   | 1.52 q < 0.0183  | 1.05 q < 1      | 1.12 q < 1         |
| NRP2      | neuropilin 2                                                         | Ssc.30598.1.A1_at   | 1.09 q < 0.134   | 1.4 q < 0.00462   | -1.01 q < 0.996   | 1.03 q < 0.895   | -1.01 q < 1     | 1.09 q < 1         |
| NRP2      | neuropilin 2                                                         | Ssc.24899.1.S1_at   | 1.09 q < 0.486   | 1.84 q < 0.000103 | -1.13 q < 0.864   | -1.14 q < 0.628  | -1.06 q < 1     | 1.14 q < 1         |
| NRP2      | NEL-like 2 (chicken)                                                 | Ssc.30598.1.A1_at   | 1.09 q < 0.134   | 1.4 q < 0.00462   | -1.01 q < 0.996   | 1.03 q < 0.895   | -1.01 q < 1     | 1.09 q < 1         |
| NRP2      | NEL-like 2 (chicken)                                                 | Ssc.24899.1.S1_at   | 1.09 q < 0.486   | 1.84 q < 0.000103 | -1.13 q < 0.864   | -1.14 q < 0.628  | -1.06 q < 1     | 1.14 q < 1         |
| IER3      | immediate early response 3                                           | Ssc.5182.1.A1_at    | 1.1 q < 0.136    | -1.03 q < 1       | 1.03 q < 0.965    | 1.36 q < 0.0283  | 1.03 q < 1      | 1.15 q < 0.973     |
| HMGA1     | high mobility group AT-hook 1                                        | Ssc.1289.1.S1_at    | 1.19 q < 0.138   | 1.75 q < 0.0472   | -1.17 q < 0.885   | 1.44 q < 0.249   | 1.08 q < 1      | 1.05 q < 1         |

| Gene Name | Gene Description                                                     | Probe Set ID       | Breed MS-WC     | Day 25 MS-WC     | Day 45 MS-WC       | Day 65 MS-WC      | Day 85 MS-WC | Day 105 MS-WC      |
|-----------|----------------------------------------------------------------------|--------------------|-----------------|------------------|--------------------|-------------------|--------------|--------------------|
| MLH1      | mutL homolog 1, colon cancer, nonpolyposis type 2 (E. coli)          | Ssc.3701.1.S1_at   | 1.1 q < 0.142   | 1.15 q < 0.897   | -1.07 q < 0.923    | 1.51 q < 0.000502 | -1.02 q < 1  | 1 q < 1            |
| BMP7      | bone morphogenetic protein 7                                         | Ssc.21774.1.S1_at  | 1.13 q < 0.142  | 1.05 q < 1       | 1.1 q < 0.91       | 1.43 q < 0.0438   | 1.06 q < 1   | 1.03 q < 1         |
| TTL7      | tubulin tyrosine ligase-like family, member 7                        | Ssc.13381.1.A1_at  | -1.09 q < 0.142 | -1.35 q < 0.013  | 1.03 q < 0.958     | -1.15 q < 0.398   | -1.01 q < 1  | 1 q < 1            |
| EEF1B2    | eukaryotic translation elongation factor 1 beta 2                    | Ssc.6663.1.A1_at   | -1.07 q < 0.143 | 1.04 q < 1       | -1.16 q < 0.31     | -1.02 q < 0.931   | 1.03 q < 1   | -1.28 q < 0.0128   |
| C12orf43  | chromosome 12 open reading frame 43                                  | Ssc.2821.1.A1_at   | 1.08 q < 0.143  | 1.01 q < 1       | 1 q < 0.997        | 1.36 q < 0.0011   | 1.04 q < 1   | 1.01 q < 1         |
| TMEM123   | transmembrane protein 123                                            | Ssc.7785.1.S1_at   | 1.19 q < 0.148  | 1.35 q < 0.725   | -1.18 q < 0.878    | 1.8 q < 0.0177    | 1.26 q < 1   | -1.09 q < 1        |
| C19orf63  | chromosome 19 open reading frame 63                                  | Ssc.23128.1.S1_at  | 1.1 q < 0.15    | 1.1 q < 1        | -1.11 q < 0.829    | 1.32 q < 0.0433   | 1.11 q < 1   | 1.08 q < 1         |
| DCLK1     | doublecortin-like kinase 1                                           | Ssc.29980.1.S1_at  | -1.08 q < 0.152 | 1.01 q < 1       | -1.02 q < 0.972    | 1.03 q < 0.858    | -1.13 q < 1  | -1.3 q < 0.0133    |
| PRKACB    | protein kinase, cAMP-dependent, catalytic, beta                      | Ssc.8658.1.A1_at   | 1.13 q < 0.152  | 1.12 q < 1       | -1.1 q < 0.913     | 1.56 q < 0.0123   | 1.1 q < 1    | 1.07 q < 1         |
| PRDM2     | PR domain containing 2, with ZNF domain                              | Ssc.13143.1.S1_at  | 1.09 q < 0.154  | 1.04 q < 1       | -1.1 q < 0.839     | 1.37 q < 0.011    | 1.09 q < 1   | 1.1 q < 1          |
| COX15     | COX15 homolog, cytochrome c oxidase assembly protein (yeast)         | Ssc.28787.1.S1_at  | 1.1 q < 0.157   | -1.01 q < 1      | -1.06 q < 0.934    | 1.36 q < 0.0316   | 1.19 q < 1   | 1.06 q < 1         |
| ERO1L     | ERO1-like (S. cerevisiae)                                            | Ssc.2709.1.S1_at   | -1.13 q < 0.16  | -1.6 q < 0.00758 | -1.01 q < 0.996    | -1.11 q < 0.722   | 1.01 q < 1   | -1.04 q < 1        |
| CLDN8     | claudin 8                                                            | Ssc.12228.1.A1_at  | 1.23 q < 0.161  | 1.33 q < 1       | 1.17 q < 0.911     | 2.01 q < 0.0242   | -1.04 q < 1  | -1.06 q < 1        |
| NANOS1    | nanos homolog 1 (Drosophila)                                         | Ssc.29246.1.A1_at  | 1.18 q < 0.161  | -1.15 q < 1      | 1 q < 0.997        | 1.76 q < 0.0153   | 1.17 q < 1   | 1.25 q < 1         |
| MAGI1     | membrane associated guanylate kinase, WW and PDZ domain containing 1 | Ssc.19060.1.A1_at  | 1.06 q < 0.164  | 1.14 q < 0.441   | 1.06 q < 0.878     | 1.02 q < 0.92     | -1.11 q < 1  | 1.23 q < 0.0301    |
| MAGI1     | CNKR family member 3                                                 | Ssc.19060.1.A1_at  | 1.06 q < 0.164  | 1.14 q < 0.441   | 1.06 q < 0.878     | 1.02 q < 0.92     | -1.11 q < 1  | 1.23 q < 0.0301    |
| HIST1H2AK | histone cluster 1, H2ak                                              | Ssc.3070.1.S1_at   | -1.12 q < 0.165 | 1.43 q < 0.0545  | -1.12 q < 0.877    | -1.37 q < 0.0832  | 1.01 q < 1   | -1.65 q < 0.000666 |
| MAPKBP1   | mitogen-activated protein kinase binding protein 1                   | Ssc.2845.1.S1_at   | 1.14 q < 0.165  | 1.03 q < 1       | -1.14 q < 0.872    | 1.7 q < 0.00269   | 1.07 q < 1   | 1.17 q < 1         |
| MAPKBP1   | mitogen-activated protein kinase binding protein 1                   | Ssc.2845.2.S1_at   | 1.04 q < 0.866  | -1.01 q < 1      | -1.15 q < 0.832    | 1.55 q < 0.0147   | -1.11 q < 1  | 1.01 q < 1         |
| TRAK2     | trafficking protein, kinesin binding 2                               | Ssc.7277.1.A1_at   | 1.13 q < 0.166  | 1.15 q < 1       | -1.12 q < 0.893    | 1.49 q < 0.0364   | 1.1 q < 1    | 1.11 q < 1         |
| CSNK1D    | casein kinase 1, delta                                               | Ssc.9746.1.S1_a_at | 1.09 q < 0.166  | 1.13 q < 0.941   | -1.06 q < 0.917    | 1.32 q < 0.0242   | 1.11 q < 1   | -1.03 q < 1        |
| PPM1E     | protein phosphatase, Mg2+/Mn2+ dependent, 1E                         | Ssc.18519.1.S1_at  | -1.08 q < 0.167 | 1.02 q < 1       | -1.42 q < 0.000323 | -1.12 q < 0.48    | -1.04 q < 1  | 1.12 q < 1         |
| ALB       | albumin                                                              | Ssc.10439.1.S1_at  | -1.72 q < 0.17  | 1.01 q < 1       | -1.03 q < 0.997    | -1.88 q < 0.596   | -1.08 q < 1  | -7.26 q < 0.0154   |
| CSDE1     | cold shock domain containing E1, RNA-binding                         | Ssc.7628.1.A1_at   | 1.11 q < 0.17   | 1.17 q < 0.927   | 1.02 q < 0.989     | 1.39 q < 0.0487   | -1.11 q < 1  | 1.14 q < 1         |
| NENF      | neuron derived neurotrophic factor                                   | Ssc.11715.1.A1_at  | -1.09 q < 0.173 | 1.05 q < 1       | -1.38 q < 0.0162   | -1.07 q < 0.759   | -1.11 q < 1  | -1 q < 1           |
| PLEKHA5   | pleckstrin homology domain containing, family A member 5             | Ssc.29424.1.A1_at  | 1.17 q < 0.174  | -1.06 q < 1      | -1.05 q < 0.972    | 1.68 q < 0.0329   | 1.27 q < 1   | 1.15 q < 1         |
| PUM1      | pumilio homolog 1 (Drosophila)                                       | Ssc.3364.2.S1_at   | 1.07 q < 0.177  | 1.01 q < 1       | -1.14 q < 0.454    | 1.09 q < 0.56     | 1.07 q < 1   | 1.33 q < 0.00152   |
| PRKRI1    | PRKR interacting protein 1 (IL11 inducible)                          | Ssc.18421.1.A1_at  | 1.09 q < 0.177  | -1.04 q < 1      | 1.04 q < 0.946     | 1.31 q < 0.0448   | 1.06 q < 1   | 1.1 q < 1          |
| UTY       | ubiquitously transcribed tetratricopeptide repeat gene, Y-linked     | Ssc.26959.1.S1_at  | 1.13 q < 0.178  | 1.07 q < 1       | -1.05 q < 0.956    | 1.57 q < 0.00893  | 1.03 q < 1   | 1.11 q < 1         |
| UNC5B     | unc-5 homolog B (C. elegans)                                         | Ssc.30844.1.A1_at  | 1.1 q < 0.178   | -1.01 q < 1      | -1.13 q < 0.766    | 1.43 q < 0.0067   | 1.03 q < 1   | 1.24 q < 0.391     |
| HAPIP     | kalirin, RhoGEF kinase                                               | Ssc.7865.1.A1_at   | -1.13 q < 0.178 | -1.52 q < 0.0383 | -1.03 q < 0.981    | -1.02 q < 0.965   | -1.12 q < 1  | -1.04 q < 1        |
| HSPB6     | heat shock protein, alpha-crystallin-related, B6                     | Ssc.13823.1.A1_at  | -1.11 q < 0.183 | -1.24 q < 0.542  | -1.42 q < 0.0398   | 1.33 q < 0.118    | -1.05 q < 1  | -1.21 q < 0.842    |
| SPTB      | spectrin, beta, erythrocytic                                         | Ssc.25211.1.S1_at  | 1.11 q < 0.185  | 1.41 q < 0.0465  | -1 q < 0.997       | 1.11 q < 0.651    | 1.01 q < 1   | 1.06 q < 1         |
| SHROOM2   | shroom family member 2                                               | Ssc.21689.1.S1_at  | 1.07 q < 0.187  | 1.07 q < 1       | -1.02 q < 0.985    | 1.1 q < 0.542     | -1.06 q < 1  | 1.31 q < 0.0137    |
| STAU2     | staufen, RNA binding protein, homolog 2 (Drosophila)                 | Ssc.7242.1.A1_at   | 1.15 q < 0.188  | -1.08 q < 1      | 1.06 q < 0.958     | 1.54 q < 0.0471   | 1.18 q < 1   | 1.11 q < 1         |
| NME1      | non-metastatic cells 1, protein (NM23A) expressed in                 | Ssc.19546.1.S1_at  | -1.09 q < 0.188 | 1.34 q < 0.0592  | -1.23 q < 0.284    | -1.21 q < 0.272   | 1.01 q < 1   | -1.42 q < 0.0076   |
| NME1      | RNA component of mitochondrial RNA processing endoribonuclease       | Ssc.19546.1.S1_at  | -1.09 q < 0.188 | 1.34 q < 0.0592  | -1.23 q < 0.284    | -1.21 q < 0.272   | 1.01 q < 1   | -1.42 q < 0.0076   |
| CDC7      | cell division cycle 7 homolog (S. cerevisiae)                        | Ssc.26024.1.S1_at  | 1.13 q < 0.189  | 1.04 q < 1       | -1.04 q < 0.974    | 1.51 q < 0.0233   | 1.06 q < 1   | 1.13 q < 1         |
| SDS       | serine dehydratase                                                   | Ssc.15246.1.S1_at  | 1.07 q < 0.189  | -1.08 q < 1      | 1.09 q < 0.771     | 1.3 q < 0.00492   | -1.01 q < 1  | 1.07 q < 1         |
| SDS       | Shwachman-Bodian-Diamond syndrome                                    | Ssc.15246.1.S1_at  | 1.07 q < 0.189  | -1.08 q < 1      | 1.09 q < 0.771     | 1.3 q < 0.00492   | -1.01 q < 1  | 1.07 q < 1         |
| STX2      | syntaxin 2                                                           | Ssc.24069.1.S1_at  | 1.08 q < 0.19   | 1 q < 1          | 1.02 q < 0.975     | 1.02 q < 0.921    | 1.06 q < 1   | 1.3 q < 0.022      |
| PAX5      | paired box 5                                                         | Ssc.19194.1.A1_at  | 1.09 q < 0.196  | 1.21 q < 0.511   | -1.2 q < 0.438     | 1.23 q < 0.198    | -1.14 q < 1  | 1.42 q < 0.00747   |
| JUN       | jun proto-oncogene                                                   | Ssc.22550.1.A1_at  | 1.08 q < 0.197  | -1.01 q < 1      | 1.06 q < 0.928     | 1.34 q < 0.0124   | -1.01 q < 1  | 1.06 q < 1         |
| TMEM2     | transmembrane protein 2                                              | Ssc.24637.1.A1_at  | 1.08 q < 0.197  | 1.05 q < 1       | 1.02 q < 0.979     | 1.33 q < 0.022    | 1.02 q < 1   | 1.03 q < 1         |
| CYP4F3    | cytochrome P450, family 4, subfamily F, polypeptide 3                | Ssc.15069.1.S1_at  | 1.13 q < 0.2    | 1.07 q < 1       | 1.32 q < 0.34      | -1.28 q < 0.308   | 1.05 q < 1   | 1.59 q < 0.0157    |
| WDR47     | WD repeat domain 47                                                  | Ssc.14429.1.A1_at  | 1.06 q < 0.201  | 1.07 q < 1       | -1.09 q < 0.751    | 1.32 q < 0.000726 | -1.06 q < 1  | 1.1 q < 0.994      |
| KYNU      | kynureninase (L-kynurenine hydrolase)                                | Ssc.7275.2.A1_at   | -1.1 q < 0.202  | 1.11 q < 1       | -1.06 q < 0.938    | -1.01 q < 0.975   | -1.11 q < 1  | -1.48 q < 0.00355  |

| Gene Name | Gene Description                                                                               | Probe Set ID        | Breed MS-WC     | Day 25 MS-WC       | Day 45 MS-WC       | Day 65 MS-WC      | Day 85 MS-WC      | Day 105 MS-WC       |
|-----------|------------------------------------------------------------------------------------------------|---------------------|-----------------|--------------------|--------------------|-------------------|-------------------|---------------------|
| HRSP12    | heat-responsive protein 12                                                                     | Ssc.8236.1.S1_at    | 1.18 q < 0.202  | 1.22 q < 1         | -1.06 q < 0.969    | 1.74 q < 0.0404   | 1.04 q < 1        | 1.12 q < 1          |
| POLR2E    | polymerase (RNA) II (DNA directed) polypeptide E, 25kDa                                        | Ssc.7464.1.S1_at    | 1.09 q < 0.204  | 1.63 q < 0.0000322 | -1.11 q < 0.845    | -1.03 q < 0.896   | 1.07 q < 1        | 1.02 q < 1          |
| ELOVL5    | ELOVL family member 5, elongation of long chain fatty acids (FEN1/Elo2, SUR4/Elo3-like, yeast) | Ssc.28365.1.A1_at   | 1.09 q < 0.205  | -1.01 q < 1        | 1.07 q < 0.911     | 1.38 q < 0.00846  | -1.03 q < 1       | 1.06 q < 1          |
| NME6      | non-metastatic cells 6, protein expressed in (nucleoside-diphosphate kinase)                   | Ssc.1496.1.S1_at    | -1.08 q < 0.205 | 1.01 q < 1         | -1.15 q < 0.579    | 1.09 q < 0.629    | -1.4 q < 0.00643  | -1.02 q < 1         |
| RPL37     | ribosomal protein L37                                                                          | Ssc.925.1.S1_at     | 1.12 q < 0.205  | -1.03 q < 1        | 1.07 q < 0.939     | 1.6 q < 0.00463   | -1.04 q < 1       | 1.1 q < 1           |
| ADAM5P    | ADAM metallopeptidase domain 5, pseudogene                                                     | Ssc.8569.1.A1_at    | -1.12 q < 0.205 | 1.15 q < 1         | -1.15 q < 0.844    | 1.04 q < 0.905    | -1.16 q < 1       | -1.62 q < 0.00627   |
| C1orf158  | chromosome 1 open reading frame 158                                                            | Ssc.17976.1.A1_at   | 1.08 q < 0.207  | -1.03 q < 1        | 1.03 q < 0.968     | 1.39 q < 0.00595  | 1.05 q < 1        | 1.04 q < 1          |
| AKAP12    | A kinase (PRKA) anchor protein 12                                                              | Ssc.7802.1.A1_at    | 1.18 q < 0.209  | 2.01 q < 0.00342   | -1.07 q < 0.958    | -1.14 q < 0.749   | -1.03 q < 1       | 1.39 q < 0.674      |
| Q8N799    | -                                                                                              | Ssc.4986.2.S1_at    | 1.07 q < 0.21   | 1.04 q < 1         | 1.02 q < 0.967     | 1.24 q < 0.0453   | 1 q < 1           | 1.04 q < 1          |
| NEB       | nebulin                                                                                        | Ssc.14277.1.A1_at   | -1.12 q < 0.214 | -1.28 q < 0.493    | -1.24 q < 0.529    | 1.28 q < 0.257    | -1.61 q < 0.00643 | 1.15 q < 1          |
| THBS1     | thrombospondin 1                                                                               | Ssc.10406.1.A1_at   | -1.09 q < 0.214 | -1.39 q < 0.0275   | 1.01 q < 0.996     | -1.02 q < 0.94    | -1.14 q < 1       | 1.03 q < 1          |
| CPNE2     | copine II                                                                                      | Ssc.5428.1.A1_at    | -1.08 q < 0.215 | -1.4 q < 0.00174   | -1.07 q < 0.9      | -1.05 q < 0.775   | -1.06 q < 1       | 1.15 q < 0.768      |
| IGHA2     | immunoglobulin heavy constant alpha 2 (A2m marker)                                             | Ssc.17718.1.S1_at   | -1.11 q < 0.215 | 1.06 q < 1         | -1.1 q < 0.905     | 1.06 q < 0.839    | -1 q < 1          | -1.73 q < 0.000133  |
| PHLDA3    | pleckstrin homology-like domain, family A, member 3                                            | Ssc.3079.1.S1_at    | -1.07 q < 0.221 | -1.17 q < 0.465    | -1.2 q < 0.212     | 1.33 q < 0.00532  | -1.24 q < 0.147   | -1.07 q < 1         |
| NME2      | non-metastatic cells 2, protein (NM23B) expressed in                                           | Ssc.2257.1.S1_at    | -1.11 q < 0.229 | 1.22 q < 0.71      | -1.32 q < 0.22     | -1.12 q < 0.658   | 1.04 q < 1        | -1.45 q < 0.0359    |
| SDCBP2    | syndecan binding protein (syntenin) 2                                                          | Ssc.5938.1.A1_at    | -1.16 q < 0.23  | 1.03 q < 1         | 1.04 q < 0.982     | -1.87 q < 0.00465 | -1.03 q < 1       | -1.15 q < 1         |
| SLC23A2   | solute carrier family 23 (nucleobase transporters), member 2                                   | Ssc.22104.1.A1_at   | -1.14 q < 0.231 | 1.01 q < 1         | -1.96 q < 0.000419 | 1.02 q < 0.968    | -1.02 q < 1       | 1 q < 1             |
| SLC23A2   | solute carrier family 23 (nucleobase transporters), member 1                                   | Ssc.22104.1.A1_at   | -1.14 q < 0.231 | 1.01 q < 1         | -1.96 q < 0.000419 | 1.02 q < 0.968    | -1.02 q < 1       | 1 q < 1             |
| HKE2      | prefoldin subunit 6                                                                            | Ssc.21182.1.S1_at   | -1.07 q < 0.239 | 1.06 q < 1         | -1.08 q < 0.869    | -1.03 q < 0.878   | 1.03 q < 1        | -1.37 q < 0.00107   |
| HEBP1     | heme binding protein 1                                                                         | Ssc.2306.1.S1_at    | 1.18 q < 0.241  | 2.68 q < 0.0000125 | -1.04 q < 0.987    | 1.02 q < 0.972    | -1.02 q < 1       | -1.13 q < 1         |
| ATP10D    | ATPase, class V, type 10D                                                                      | Ssc.9238.1.A1_at    | 1.15 q < 0.243  | -1.02 q < 1        | -1.08 q < 0.951    | 1.81 q < 0.00717  | -1.01 q < 1       | 1.24 q < 1          |
| PPP1R12C  | protein phosphatase 1, regulatory (inhibitor) subunit 12C                                      | Ssc.6360.1.S1_at    | 1.07 q < 0.245  | 1.06 q < 1         | -1.05 q < 0.928    | 1.26 q < 0.0486   | 1.01 q < 1        | 1.1 q < 1           |
| PPP1R3D   | protein phosphatase 1, regulatory (inhibitor) subunit 3D                                       | Ssc.2361.1.A1_at    | 1.11 q < 0.247  | 1.1 q < 1          | 1 q < 0.997        | 1.51 q < 0.00984  | -1.02 q < 1       | 1.02 q < 1          |
| FAM26F    | family with sequence similarity 26, member F                                                   | Ssc.19365.1.S1_at   | -1.11 q < 0.249 | -1.01 q < 1        | 1.02 q < 0.989     | 1.05 q < 0.873    | 1.02 q < 1        | -1.85 q < 0.0000462 |
| ALDH1B1   | aldehyde dehydrogenase 1 family, member B1                                                     | Ssc.25096.1.A1_at   | 1.09 q < 0.249  | 1.41 q < 0.00228   | -1.02 q < 0.988    | 1.11 q < 0.63     | -1.02 q < 1       | 1.03 q < 1          |
| ATP5L     | ATP synthase, H+ transporting, mitochondrial Fo complex, subunit G                             | Ssc.2957.1.S2_at    | 1.1 q < 0.256   | 1.08 q < 1         | 1 q < 0.999        | 1.49 q < 0.0085   | -1.05 q < 1       | 1.04 q < 1          |
| AQP9      | aquaporin 9                                                                                    | Ssc.7234.1.A1_at    | 1.08 q < 0.257  | 1.19 q < 0.492     | 1.1 q < 0.812      | 1.3 q < 0.0325    | 1 q < 1           | -1.19 q < 0.53      |
| AQP9      | aquaporin 7                                                                                    | Ssc.7234.1.A1_at    | 1.08 q < 0.257  | 1.19 q < 0.492     | 1.1 q < 0.812      | 1.3 q < 0.0325    | 1 q < 1           | -1.19 q < 0.53      |
| SLMO2     | slowmo homolog 2 (Drosophila)                                                                  | Ssc.1913.1.A1_at    | 1.18 q < 0.258  | 1.21 q < 1         | -1.11 q < 0.94     | 1.8 q < 0.0441    | 1.18 q < 1        | 1 q < 1             |
| C12orf36  | chromosome 12 open reading frame 36                                                            | Ssc.27503.1.A1_at   | 1.09 q < 0.258  | 1.01 q < 1         | 1.1 q < 0.878      | 1.39 q < 0.0222   | -1.04 q < 1       | 1.03 q < 1          |
| NP_957712 | -                                                                                              | Ssc.8731.1.S1_at    | 1.1 q < 0.263   | 1.15 q < 1         | -1.1 q < 0.9       | 1.39 q < 0.0487   | 1.09 q < 1        | 1.02 q < 1          |
| WBP4      | WW domain binding protein 4 (formin binding protein 21)                                        | Ssc.11213.1.S1_at   | 1.05 q < 0.263  | 1.03 q < 1         | -1.01 q < 0.982    | 1.27 q < 0.00202  | -1.08 q < 1       | 1.09 q < 1          |
| MBNL1     | muscleblind-like (Drosophila)                                                                  | Ssc.10532.1.A1_at   | 1.09 q < 0.264  | 1.01 q < 1         | -1.03 q < 0.977    | 1.47 q < 0.00617  | 1.06 q < 1        | 1.02 q < 1          |
| YWHAE     | tyrosine 3-monooxygenase/tryptophan 5-monooxygenase activation protein, epsilon polypeptide    | Ssc.21462.1.S1_at   | -1.14 q < 0.266 | -1.54 q < 0.124    | -1.24 q < 0.722    | -1.31 q < 0.361   | 1.71 q < 0.0289   | -1.32 q < 0.724     |
| TPK1      | thiamin pyrophosphokinase 1                                                                    | Ssc.24771.1.A1_at   | -1.1 q < 0.266  | -1.01 q < 1        | 1.29 q < 0.253     | -1.34 q < 0.0908  | -1.47 q < 0.0251  | -1.03 q < 1         |
| CCNB3     | cyclin B3                                                                                      | Ssc.26568.1.A1_s_at | 1.07 q < 0.267  | 1.3 q < 0.0457     | 1.04 q < 0.945     | 1.03 q < 0.872    | -1.03 q < 1       | 1.04 q < 1          |
| SCARB2    | scavenger receptor class B, member 2                                                           | Ssc.23484.2.S1_at   | 1.08 q < 0.269  | -1.08 q < 1        | -1.05 q < 0.943    | 1.36 q < 0.0246   | 1.12 q < 1        | 1.11 q < 1          |
| PSME1     | proteasome (prosome, macropain) activator subunit 1 (PA28 alpha)                               | Ssc.1163.1.S1_at    | -1.09 q < 0.269 | 1.24 q < 0.384     | -1.42 q < 0.0143   | -1.09 q < 0.685   | 1.04 q < 1        | -1.27 q < 0.291     |
| IFT57     | Intraflagellar transport 57 homolog (Chlamydomonas)                                            | Ssc.13576.2.S1_at   | -1.07 q < 0.271 | -1.33 q < 0.0237   | -1.03 q < 0.97     | 1.02 q < 0.942    | -1.04 q < 1       | -1.03 q < 1         |
| FAM107B   | family with sequence similarity 107, member B                                                  | Ssc.14418.2.A1_at   | 1.07 q < 0.272  | -1.05 q < 1        | 1.03 q < 0.969     | 1.28 q < 0.034    | 1.05 q < 1        | 1.07 q < 1          |
| TP53NP1   | tumor protein p53 inducible nuclear protein 1                                                  | Ssc.29750.1.A1_at   | -1.1 q < 0.273  | -1.55 q < 0.00497  | -1.2 q < 0.625     | -1.11 q < 0.672   | 1.01 q < 1        | 1.27 q < 0.49       |
| POR       | P450 (cytochrome) oxidoreductase                                                               | Ssc.2887.1.S1_at    | 1.13 q < 0.276  | 1.14 q < 1         | -1.24 q < 0.658    | 1.54 q < 0.0378   | 1.15 q < 1        | 1.12 q < 1          |
| POR       | porcupine homolog (Drosophila)                                                                 | Ssc.2887.1.S1_at    | 1.13 q < 0.276  | 1.14 q < 1         | -1.24 q < 0.658    | 1.54 q < 0.0378   | 1.15 q < 1        | 1.12 q < 1          |
| FAAH      | fatty acid amide hydrolase                                                                     | Ssc.2698.1.S1_at    | 1.07 q < 0.281  | 1.05 q < 1         | 1.06 q < 0.922     | -1.03 q < 0.908   | -1 q < 1          | 1.32 q < 0.0322     |

| Gene Name | Gene Description                                                                      | Probe Set ID        | Breed MS-WC     | Day 25 MS-WC            | Day 45 MS-WC      | Day 65 MS-WC      | Day 85 MS-WC | Day 105 MS-WC      |
|-----------|---------------------------------------------------------------------------------------|---------------------|-----------------|-------------------------|-------------------|-------------------|--------------|--------------------|
| FAAH      | fatty acid 2-hydroxylase                                                              | Ssc.2698.1.S1_at    | 1.07 q < 0.281  | 1.05 q < 1              | 1.06 q < 0.922    | -1.03 q < 0.908   | -1 q < 1     | 1.32 q < 0.0322    |
| APRT      | adenine phosphoribosyltransferase                                                     | Ssc.2191.1.S1_at    | -1.08 q < 0.281 | 1.08 q < 1              | -1.34 q < 0.0225  | 1.1 q < 0.591     | -1.02 q < 1  | -1.25 q < 0.187    |
| MAPKAP1   | mitogen-activated protein kinase associated protein 1                                 | Ssc.21536.1.A1_at   | -1.17 q < 0.282 | -1.04 q < 1             | -1.8 q < 0.0424   | -1.17 q < 0.714   | -1.26 q < 1  | 1.25 q < 1         |
| KSR2      | kinase suppressor of ras 2                                                            | Ssc.5331.1.S1_at    | -1.1 q < 0.288  | -1.06 q < 1             | -1.61 q < 0.00224 | -1.02 q < 0.94    | -1.24 q < 1  | 1.33 q < 0.252     |
| KSR2      | connector enhancer of kinase suppressor of Ras 2                                      | Ssc.5331.1.S1_at    | -1.1 q < 0.288  | -1.06 q < 1             | -1.61 q < 0.00224 | -1.02 q < 0.94    | -1.24 q < 1  | 1.33 q < 0.252     |
| INPP5D    | inositol polyphosphate-5-phosphatase, 145kDa                                          | Ssc.19063.1.S1_at   | 1.11 q < 0.291  | -1.07 q < 1             | 1.11 q < 0.893    | 1.53 q < 0.0153   | 1.06 q < 1   | -1 q < 1           |
| DOCK9     | dedicator of cytokinesis 9                                                            | Ssc.8919.1.S1_at    | 1.07 q < 0.298  | 1.02 q < 1              | 1.03 q < 0.958    | 1.28 q < 0.0423   | 1.07 q < 1   | -1.03 q < 1        |
| CCDC15    | coiled-coil domain containing 15                                                      | Ssc.21272.1.A1_at   | -1.15 q < 0.298 | -1.28 q < 0.921         | -1.69 q < 0.0456  | 1.14 q < 0.736    | -1.19 q < 1  | 1.13 q < 1         |
| NUDCD2    | NudC domain containing 2                                                              | Ssc.6107.1.S1_at    | 1.09 q < 0.301  | 1.04 q < 1              | -1.02 q < 0.989   | 1.4 q < 0.0219    | -1.02 q < 1  | 1.08 q < 1         |
| SNORA32   | small nucleolar RNA, H/ACA box 32                                                     | Ssc.489.1.A1_at     | -1.12 q < 0.302 | -2.59 q < 0.00000000692 | 1.09 q < 0.926    | 1.23 q < 0.461    | -1.15 q < 1  | 1.28 q < 0.747     |
| IGF2AS    | insulin-like growth factor 2 antisense                                                | Ssc.9365.6.A1_a_at  | -1.07 q < 0.304 | -1.25 q < 0.214         | -1.33 q < 0.0315  | 1.18 q < 0.321    | -1.04 q < 1  | 1.02 q < 1         |
| STMN1     | stathmin 1                                                                            | Ssc.7701.1.A1_at    | -1.13 q < 0.305 | 1.4 q < 0.333           | -1.29 q < 0.529   | -1.15 q < 0.648   | -1.06 q < 1  | -1.6 q < 0.0343    |
| RARRES3   | retinoic acid receptor responder (tazarotene induced) 3                               | Ssc.24766.1.S1_at   | 1.15 q < 0.307  | 1.08 q < 1              | -1.33 q < 0.606   | 2.09 q < 0.000966 | -1.04 q < 1  | 1.24 q < 1         |
| SLC39A14  | solute carrier family 39 (zinc transporter), member 14                                | Ssc.19427.1.S1_at   | 1.07 q < 0.308  | -1.03 q < 1             | 1.01 q < 0.991    | 1.27 q < 0.0349   | -1.01 q < 1  | 1.1 q < 1          |
| FGFBP3    | fibroblast growth factor binding protein 3                                            | Ssc.25031.1.S1_at   | 1.09 q < 0.312  | 1.03 q < 1              | -1 q < 0.999      | 1.09 q < 0.736    | -1.02 q < 1  | 1.42 q < 0.0408    |
| MARCO     | macrophage receptor with collagenous structure                                        | Ssc.19357.1.S1_at   | -1.1 q < 0.317  | -1.04 q < 1             | 1.01 q < 0.993    | 1.07 q < 0.796    | -1.03 q < 1  | -1.6 q < 0.00163   |
| CCDC56    | coiled-coil domain containing 56                                                      | Ssc.3838.1.S1_at    | 1.08 q < 0.318  | 1.53 q < 0.000735       | -1.04 q < 0.961   | -1.01 q < 0.977   | 1.06 q < 1   | -1.05 q < 1        |
| BTG3      | BTG family, member 3                                                                  | Ssc.9666.1.S1_at    | 1.11 q < 0.318  | -1.03 q < 1             | -1.29 q < 0.457   | 1.78 q < 0.000904 | 1.03 q < 1   | 1.26 q < 0.803     |
| NP_694539 | -                                                                                     | Ssc.13556.1.A1_at   | 1.09 q < 0.32   | 1.48 q < 0.0158         | -1.23 q < 0.487   | 1.2 q < 0.415     | -1.01 q < 1  | 1.09 q < 1         |
| CCNG1     | cyclin G1                                                                             | Ssc.5070.1.A1_at    | 1.12 q < 0.321  | 1.04 q < 1              | -1.13 q < 0.894   | 1.57 q < 0.0307   | 1.17 q < 1   | 1.04 q < 1         |
| PI4K2B    | phosphatidylinositol 4-kinase type 2 beta                                             | Ssc.17355.1.A1_at   | 1.1 q < 0.324   | -1.09 q < 1             | 1.02 q < 0.987    | 1.43 q < 0.0456   | 1.01 q < 1   | 1.19 q < 1         |
| FOLR1     | folate receptor 1 (adult)                                                             | Ssc.11779.1.S1_at   | -1.16 q < 0.332 | -1.11 q < 1             | -1.16 q < 0.903   | 1.13 q < 0.778    | 1.21 q < 1   | -2.21 q < 0.000881 |
| CAMK2N1   | calcium/calmodulin-dependent protein kinase II inhibitor 1                            | Ssc.6447.1.A1_at    | -1.09 q < 0.334 | 1.13 q < 1              | -1.55 q < 0.00216 | 1.08 q < 0.756    | -1.14 q < 1  | -1.05 q < 1        |
| QDPR      | quinoid dihydropteridine reductase                                                    | Ssc.17250.1.S1_a_at | 1.11 q < 0.339  | 1.64 q < 0.00762        | -1.08 q < 0.937   | 1.01 q < 0.979    | -1.02 q < 1  | 1.11 q < 1         |
| TNKS1BP1  | tankyrase 1 binding protein 1, 182kDa                                                 | Ssc.3430.1.A1_at    | 1.08 q < 0.34   | 1 q < 1                 | -1.02 q < 0.981   | 1.41 q < 0.0147   | 1.08 q < 1   | -1.01 q < 1        |
| GPR175    | transmembrane protein, adipocyte associated 1                                         | Ssc.20244.1.S1_at   | 1.07 q < 0.344  | -1.02 q < 1             | -1.08 q < 0.885   | 1.32 q < 0.0212   | 1.01 q < 1   | 1.14 q < 0.925     |
| MGMT      | O-6-methylguanine-DNA methyltransferase                                               | Ssc.19639.1.A1_at   | -1.06 q < 0.344 | -1.1 q < 1              | -1.33 q < 0.0125  | 1 q < 0.985       | 1.01 q < 1   | 1.05 q < 1         |
| KMO       | kynurenine 3-monoxygenase (kynurenine 3-hydroxylase)                                  | Ssc.283.1.S1_at     | -1.09 q < 0.346 | 1 q < 1                 | 1.06 q < 0.942    | -1 q < 0.997      | -1.08 q < 1  | -1.52 q < 0.00787  |
| EDC4      | enhancer of mRNA decapping 4                                                          | Ssc.948.1.A1_at     | 1.06 q < 0.353  | -1.01 q < 1             | 1.03 q < 0.961    | 1.26 q < 0.0496   | -1 q < 1     | 1.06 q < 1         |
| PPA2      | pyrophosphatase (inorganic) 2                                                         | Ssc.30813.1.A1_at   | -1.07 q < 0.353 | 1.03 q < 1              | -1.33 q < 0.0468  | -1.07 q < 0.735   | -1.01 q < 1  | -1.02 q < 1        |
| LONRF3    | LON peptidase N-terminal domain and ring finger 3                                     | Ssc.10329.1.S1_at   | 1.08 q < 0.354  | -1.09 q < 1             | 1.04 q < 0.949    | 1.13 q < 0.524    | -1.05 q < 1  | 1.39 q < 0.0146    |
| FLRT2     | fibronectin leucine rich transmembrane protein 2                                      | Ssc.9215.1.A1_at    | -1.08 q < 0.354 | -1.56 q < 0.00113       | 1.01 q < 0.996    | 1.02 q < 0.956    | -1.02 q < 1  | 1.04 q < 1         |
| CDKN1A    | cyclin-dependent kinase inhibitor 1A (p21, Cip1)                                      | Ssc.5737.1.S1_at    | 1.09 q < 0.357  | -1.06 q < 1             | 1.01 q < 0.991    | 1.42 q < 0.0329   | 1.21 q < 1   | -1.06 q < 1        |
| AW437138  | -                                                                                     | Ssc.20353.1.S1_at   | -1.08 q < 0.357 | -1.47 q < 0.00542       | 1.05 q < 0.946    | -1.04 q < 0.873   | -1.1 q < 1   | 1.09 q < 1         |
| TCTN3     | tectonic family member 3                                                              | Ssc.5488.1.S1_at    | 1.08 q < 0.358  | 1 q < 1                 | 1.1 q < 0.866     | 1.45 q < 0.00478  | -1.03 q < 1  | -1.07 q < 1        |
| IGFBP7    | insulin-like growth factor binding protein 7                                          | Ssc.17186.2.S2_at   | -1.19 q < 0.36  | 1.5 q < 0.655           | -2.4 q < 0.00407  | -1.06 q < 0.926   | -1.32 q < 1  | -1.06 q < 1        |
| FNBP4     | formin binding protein 4                                                              | Ssc.12416.1.S1_a_at | 1.08 q < 0.361  | 1 q < 1                 | -1.01 q < 0.994   | 1.41 q < 0.0191   | -1.01 q < 1  | 1.07 q < 1         |
| CD47      | CD47 molecule                                                                         | Ssc.17142.1.A1_s_at | 1.12 q < 0.364  | 1.09 q < 1              | -1.17 q < 0.844   | 1.59 q < 0.0325   | -1.01 q < 1  | 1.2 q < 1          |
| USF2      | upstream transcription factor 2, c-fos interacting                                    | Ssc.20441.2.S1_at   | -1.07 q < 0.366 | -1.01 q < 1             | -1.33 q < 0.038   | 1.09 q < 0.664    | -1.13 q < 1  | -1.02 q < 1        |
| EIF3E     | eukaryotic translation initiation factor 3, subunit E                                 | Ssc.15631.1.S1_at   | -1.08 q < 0.369 | 1.11 q < 1              | -1.42 q < 0.00971 | 1.03 q < 0.901    | 1.03 q < 1   | -1.2 q < 0.646     |
| SPDYA     | speedy homolog A (Xenopus laevis)                                                     | Ssc.5232.2.A1_a_at  | 1.11 q < 0.369  | 1.05 q < 1              | 1 q < 1           | 1.51 q < 0.0372   | 1.08 q < 1   | -1.03 q < 1        |
| GJB3      | gap junction protein, beta 3, 31kDa                                                   | Ssc.21830.1.A1_at   | 1.13 q < 0.381  | -1.03 q < 1             | 1.2 q < 0.841     | 1.66 q < 0.0344   | 1.12 q < 1   | -1.17 q < 1        |
| ZC3HAV1   | zinc finger CCCH-type, antiviral 1                                                    | Ssc.20242.1.A1_at   | -1.07 q < 0.386 | -1.15 q < 0.89          | -1.38 q < 0.0217  | 1.03 q < 0.915    | 1.12 q < 1   | -1.03 q < 1        |
| MRPL52    | mitochondrial ribosomal protein L52                                                   | Ssc.3811.1.S1_a_at  | 1.06 q < 0.387  | 1.01 q < 1              | -1.04 q < 0.942   | 1.32 q < 0.00682  | 1.04 q < 1   | 1 q < 1            |
| MRAP2     | melanocortin 2 receptor accessory protein 2                                           | Ssc.17375.1.S1_at   | -1.13 q < 0.392 | -1.89 q < 0.00722       | -1.25 q < 0.761   | 1.1 q < 0.814     | 1.2 q < 1    | -1.05 q < 1        |
| PTGS2     | prostaglandin-endoperoxide synthase 2 (prostaglandin G/H synthase and cyclooxygenase) | Ssc.7314.1.A1_at    | 1.18 q < 0.393  | -1.08 q < 1             | -1.03 q < 0.99    | 1.98 q < 0.0424   | 1.19 q < 1   | 1.1 q < 1          |
| LMNB1     | lamin B1                                                                              | Ssc.21730.1.S1_at   | 1.08 q < 0.397  | 1.75 q < 0.000014       | -1.07 q < 0.933   | 1.02 q < 0.937    | -1.03 q < 1  | -1.09 q < 1        |

| Gene Name | Gene Description                                                                  | Probe Set ID        | Breed MS-WC     | Day 25 MS-WC         | Day 45 MS-WC      | Day 65 MS-WC      | Day 85 MS-WC | Day 105 MS-WC         |
|-----------|-----------------------------------------------------------------------------------|---------------------|-----------------|----------------------|-------------------|-------------------|--------------|-----------------------|
| VKORC1L1  | vitamin K epoxide reductase complex, subunit 1-like 1                             | Ssc.21554.1.A1_at   | 1.08 q < 0.401  | 1.08 q < 1           | -1.04 q < 0.958   | 1.39 q < 0.036    | 1.04 q < 1   | -1.01 q < 1           |
| SMYD3     | SET and MYND domain containing 3                                                  | Ssc.28198.1.A1_at   | 1.07 q < 0.402  | -1.02 q < 1          | -1.02 q < 0.989   | 1.39 q < 0.0116   | -1.01 q < 1  | 1.06 q < 1            |
| IRF2BP2   | interferon regulatory factor 2 binding protein 2                                  | Ssc.10096.2.A1_at   | 1.08 q < 0.404  | -1.09 q < 1          | 1.02 q < 0.985    | 1.45 q < 0.0106   | -1.05 q < 1  | 1.13 q < 1            |
| AGPS      | alkylglycerone phosphate synthase                                                 | Ssc.25474.1.S1_at   | 1.06 q < 0.408  | 1.13 q < 0.91        | -1.09 q < 0.844   | 1.34 q < 0.015    | 1.05 q < 1   | -1.06 q < 1           |
| HRB       | ArfGAP with FG repeats 1                                                          | Ssc.24102.1.S1_at   | -1.11 q < 0.414 | 1 q < 1              | -1.58 q < 0.0398  | -1 q < 0.994      | -1.02 q < 1  | -1.05 q < 1           |
| FHDC1     | FH2 domain containing 1                                                           | Ssc.16516.1.S1_at   | 1.06 q < 0.423  | -1.03 q < 1          | -1.09 q < 0.818   | 1.28 q < 0.0325   | 1.02 q < 1   | 1.15 q < 0.747        |
| UCHL1     | ubiquitin carboxyl-terminal esterase L1 (ubiquitin thiolesterase)                 | Ssc.2073.1.A1_at    | 1.14 q < 0.427  | 3.22 q < 0.000000301 | -1.03 q < 0.988   | -1.28 q < 0.523   | 1.08 q < 1   | -1.36 q < 0.833       |
| YY1       | YY1 transcription factor                                                          | Ssc.9948.1.S1_at    | 1.07 q < 0.427  | 1.07 q < 1           | -1.09 q < 0.878   | 1.35 q < 0.034    | 1.02 q < 1   | 1.04 q < 1            |
| HPRT1     | hypoxanthine phosphoribosyltransferase 1                                          | Ssc.4158.1.S1_at    | -1.09 q < 0.43  | 1.19 q < 0.972       | -1.18 q < 0.749   | -1 q < 0.993      | -1.05 q < 1  | -1.5 q < 0.0394       |
| PLOD2     | procollagen-lysine, 2-oxoglutarate 5-dioxygenase 2                                | Ssc.25095.1.S1_at   | -1.07 q < 0.431 | -1.41 q < 0.00635    | 1.06 q < 0.932    | 1.07 q < 0.754    | -1.09 q < 1  | -1.01 q < 1           |
| RNF144B   | ring finger protein 144B                                                          | Ssc.22566.1.S1_at   | 1.06 q < 0.435  | -1.05 q < 1          | 1.08 q < 0.859    | 1.28 q < 0.0336   | -1.02 q < 1  | 1.02 q < 1            |
| EMB       | embigin                                                                           | Ssc.4182.1.A1_at    | 1.11 q < 0.441  | 1.13 q < 1           | -1.17 q < 0.854   | 1.61 q < 0.0336   | 1.14 q < 1   | -1.04 q < 1           |
| EMB       | exportin 1 (CRM1 homolog, yeast)                                                  | Ssc.4182.1.A1_at    | 1.11 q < 0.441  | 1.13 q < 1           | -1.17 q < 0.854   | 1.61 q < 0.0336   | 1.14 q < 1   | -1.04 q < 1           |
| PER1      | period homolog 1 (Drosophila)                                                     | Ssc.16979.1.S1_a_at | 1.06 q < 0.443  | -1.17 q < 0.665      | -1.05 q < 0.937   | 1.42 q < 0.00111  | 1.01 q < 1   | 1.15 q < 0.848        |
| PER1      | period homolog 1 (Drosophila)                                                     | Ssc.16979.3.S1_a_at | 1.03 q < 0.789  | -1.11 q < 0.998      | -1.09 q < 0.829   | 1.27 q < 0.0261   | -1.02 q < 1  | 1.12 q < 0.931        |
| PER1      | post-GPI attachment to proteins 3                                                 | Ssc.16979.1.S1_a_at | 1.06 q < 0.443  | -1.17 q < 0.665      | -1.05 q < 0.937   | 1.42 q < 0.00111  | 1.01 q < 1   | 1.15 q < 0.848        |
| PER1      | post-GPI attachment to proteins 3                                                 | Ssc.16979.3.S1_a_at | 1.03 q < 0.789  | -1.11 q < 0.998      | -1.09 q < 0.829   | 1.27 q < 0.0261   | -1.02 q < 1  | 1.12 q < 0.931        |
| O9H373    | -                                                                                 | Ssc.7256.1.A1_at    | -1.12 q < 0.443 | -1.01 q < 1          | -1.01 q < 0.997   | -1.02 q < 0.973   | -1.03 q < 1  | -1.63 q < 0.0478      |
| RBP1      | retinol binding protein 1, cellular                                               | Ssc.5563.1.S1_at    | -1.12 q < 0.443 | -1.34 q < 0.66       | -1.05 q < 0.976   | -1.78 q < 0.00967 | -1.02 q < 1  | 1.44 q < 0.36         |
| RBP1      | AT rich interactive domain 4A (RBP1-like)                                         | Ssc.5563.1.S1_at    | -1.12 q < 0.443 | -1.34 q < 0.66       | -1.05 q < 0.976   | -1.78 q < 0.00967 | -1.02 q < 1  | 1.44 q < 0.36         |
| RGS10     | regulator of G-protein signaling 10                                               | Ssc.5274.1.S1_at    | -1.07 q < 0.448 | 1.28 q < 0.145       | -1.13 q < 0.756   | -1.06 q < 0.782   | -1.07 q < 1  | -1.37 q < 0.018       |
| GBP1      | guanylate binding protein 1, interferon-inducible, 67kDa                          | Ssc.29054.1.A1_at   | -1.11 q < 0.448 | 1.27 q < 0.85        | 1.09 q < 0.94     | 1.04 q < 0.931    | 1.13 q < 1   | -2.77 q < 0.000000066 |
| GBP1      | guanylate binding protein 1, interferon-inducible, 67kDa                          | Ssc.29054.3.S1_at   | -1.05 q < 0.702 | 1.09 q < 1           | 1.04 q < 0.961    | 1.15 q < 0.521    | -1 q < 1     | -1.66 q < 0.000078    |
| DKK2      | dickkopf homolog 2 (Xenopus laevis)                                               | Ssc.30925.1.A1_at   | -1.14 q < 0.449 | -1.91 q < 0.0234     | -1.02 q < 0.994   | 1.01 q < 0.992    | 1.09 q < 1   | -1.09 q < 1           |
| DERL2     | Der1-like domain family, member 2                                                 | Ssc.16776.1.S1_at   | 1.07 q < 0.449  | -1.02 q < 1          | -1.1 q < 0.885    | 1.4 q < 0.0201    | 1.13 q < 1   | 1.01 q < 1            |
| TAF4B     | TAF4b RNA polymerase II, TATA box binding protein (TBP)-associated factor, 105kDa | Ssc.13547.1.A1_at   | -1.11 q < 0.449 | -1.01 q < 1          | -1.73 q < 0.00914 | 1.17 q < 0.634    | -1.21 q < 1  | 1.08 q < 1            |
| TAF4B     | PAPPA antisense RNA (non-protein coding)                                          | Ssc.13547.1.A1_at   | -1.11 q < 0.449 | -1.01 q < 1          | -1.73 q < 0.00914 | 1.17 q < 0.634    | -1.21 q < 1  | 1.08 q < 1            |
| GOT1      | glutamic-oxaloacetic transaminase 1, soluble (aspartate aminotransferase 1)       | Ssc.3528.1.S1_at    | 1.18 q < 0.452  | 1.18 q < 1           | -1.75 q < 0.232   | 2.08 q < 0.036    | 1.32 q < 1   | 1.23 q < 1            |
| GOT1      | golgi transport 1B                                                                | Ssc.3528.1.S1_at    | 1.18 q < 0.452  | 1.18 q < 1           | -1.75 q < 0.232   | 2.08 q < 0.036    | 1.32 q < 1   | 1.23 q < 1            |
| GOT1      | golgi transport 1A                                                                | Ssc.3528.1.S1_at    | 1.18 q < 0.452  | 1.18 q < 1           | -1.75 q < 0.232   | 2.08 q < 0.036    | 1.32 q < 1   | 1.23 q < 1            |
| SIGLEC10  | sialic acid binding Ig-like lectin 10                                             | Ssc.27233.1.S1_at   | 1.07 q < 0.452  | 1.38 q < 0.0477      | 1.03 q < 0.972    | -1.08 q < 0.751   | 1.02 q < 1   | 1.06 q < 1            |
| SCYE1     | aminoacyl tRNA synthetase complex interacting multifunctional protein 1           | Ssc.9246.1.S1_at    | -1.07 q < 0.452 | 1.06 q < 1           | -1.37 q < 0.0378  | 1.03 q < 0.899    | -1.03 q < 1  | -1.09 q < 1           |
| APC       | adenomatous polyposis coli                                                        | Ssc.22176.1.A1_at   | 1.06 q < 0.454  | -1.08 q < 1          | 1.1 q < 0.799     | 1.36 q < 0.00421  | -1.02 q < 1  | -1.04 q < 1           |
| PPP1R9A   | protein phosphatase 1, regulatory (inhibitor) subunit 9A                          | Ssc.10642.1.S1_at   | 1.11 q < 0.454  | 1.09 q < 1           | -1.18 q < 0.844   | 1.57 q < 0.0457   | -1 q < 1     | 1.16 q < 1            |
| MAN1C1    | mannosidase, alpha, class 1C, member 1                                            | Ssc.19360.1.S1_at   | 1.09 q < 0.457  | -1.01 q < 1          | -1.11 q < 0.894   | 1.58 q < 0.00764  | -1.07 q < 1  | 1.17 q < 1            |
| TSPO      | translocator protein (18kDa)                                                      | Ssc.5936.1.A1_a_at  | 1.13 q < 0.459  | 1.11 q < 1           | 1 q < 1           | 1.73 q < 0.0433   | 1.2 q < 1    | -1.23 q < 1           |
| FAM129B   | family with sequence similarity 129, member B                                     | Ssc.4690.1.S1_at    | 1.08 q < 0.46   | 1.07 q < 1           | -1.1 q < 0.885    | 1.51 q < 0.0067   | 1.03 q < 1   | -1.02 q < 1           |
| ZNF365    | zinc finger protein 365                                                           | Ssc.29840.1.A1_at   | 1.07 q < 0.461  | -1.11 q < 1          | -1.04 q < 0.968   | 1.49 q < 0.00329  | 1.18 q < 1   | -1.08 q < 1           |
| VDAC3     | voltage-dependent anion channel 3                                                 | Ssc.13817.1.A1_at   | -1.07 q < 0.462 | 1.26 q < 0.308       | -1.41 q < 0.0144  | -1.11 q < 0.634   | -1.06 q < 1  | -1.06 q < 1           |
| VDAC3     | voltage-dependent anion channel 1 pseudogene 5                                    | Ssc.13817.1.A1_at   | -1.07 q < 0.462 | 1.26 q < 0.308       | -1.41 q < 0.0144  | -1.11 q < 0.634   | -1.06 q < 1  | -1.06 q < 1           |
| CEBPD     | CCAAT/enhancer binding protein (C/EBP), delta                                     | Ssc.10025.3.S1_at   | 1.09 q < 0.466  | -1.03 q < 1          | -1.07 q < 0.94    | 1.64 q < 0.004    | -1.1 q < 1   | 1.15 q < 1            |
| DPEP2     | dipeptidase 2                                                                     | Ssc.12793.1.A1_at   | 1.06 q < 0.466  | -1.05 q < 1          | 1.05 q < 0.943    | 1.32 q < 0.0248   | 1.02 q < 1   | -1 q < 1              |
| SLC22A15  | solute carrier family 22, member 15                                               | Ssc.25054.1.S1_at   | -1.07 q < 0.466 | -1.03 q < 1          | -1.35 q < 0.0306  | -1.16 q < 0.433   | -1.08 q < 1  | 1.27 q < 0.179        |
| TMEM88    | transmembrane protein 88                                                          | Ssc.18336.1.S1_at   | 1.09 q < 0.466  | 1.62 q < 0.00864     | -1.28 q < 0.468   | 1.09 q < 0.761    | -1.07 q < 1  | 1.2 q < 1             |
| ENPP2     | ectonucleotide pyrophosphatase/phosphodiesterase 2                                | Ssc.5142.1.S1_at    | 1.1 q < 0.467   | 1.08 q < 1           | -1.01 q < 0.996   | -1.16 q < 0.607   | 1.08 q < 1   | 1.58 q < 0.0215       |
| CREM      | cAMP responsive element modulator                                                 | Ssc.2841.1.S1_at    | 1.08 q < 0.469  | 1.05 q < 1           | -1.25 q < 0.444   | 1.53 q < 0.00602  | -1.05 q < 1  | 1.21 q < 0.849        |

| Gene Name | Gene Description                                                                  | Probe Set ID       | Breed MS-WC     | Day 25 MS-WC       | Day 45 MS-WC      | Day 65 MS-WC       | Day 85 MS-WC      | Day 105 MS-WC      |
|-----------|-----------------------------------------------------------------------------------|--------------------|-----------------|--------------------|-------------------|--------------------|-------------------|--------------------|
| GPR158    | G protein-coupled receptor 158                                                    | Ssc.9985.1.A1_at   | -1.11 q < 0.473 | -1.05 q < 1        | -1.74 q < 0.0108  | 1.36 q < 0.268     | -1.14 q < 1       | -1.09 q < 1        |
| NAAA      | N-acyl ethanolamine acid amidase                                                  | Ssc.24984.1.S1_at  | 1.08 q < 0.475  | 1.06 q < 1         | -1.17 q < 0.746   | 1.47 q < 0.0264    | -1.06 q < 1       | 1.19 q < 1         |
| Q8TAD7    | -                                                                                 | Ssc.6028.1.S1_at   | -1.24 q < 0.479 | 1.63 q < 0.839     | -1.43 q < 0.823   | 1.03 q < 0.975     | -3.29 q < 0.00967 | -1.03 q < 1        |
| CDKN1C    | cyclin-dependent kinase inhibitor 1C (p57, Kip2)                                  | Ssc.8871.1.S1_at   | 1.12 q < 0.481  | -1.07 q < 1        | -1.26 q < 0.731   | 2.26 q < 0.0000806 | 1.09 q < 1        | -1.04 q < 1        |
| PRDM6     | PR domain containing 6                                                            | Ssc.5471.1.A1_at   | 1.06 q < 0.482  | -1.07 q < 1        | 1.02 q < 0.98     | 1.05 q < 0.808     | -1.04 q < 1       | 1.36 q < 0.00663   |
| BANK1     | B-cell scaffold protein with ankyrin repeats 1                                    | Ssc.25700.1.S1_at  | -1.08 q < 0.483 | -1 q < 1           | 1.02 q < 0.989    | -1.01 q < 0.984    | -1.02 q < 1       | -1.46 q < 0.0322   |
| FRMD4A    | FERM domain containing 4A                                                         | Ssc.5434.1.A1_at   | -1.06 q < 0.484 | -1.38 q < 0.0243   | -1.09 q < 0.889   | 1.04 q < 0.85      | 1.03 q < 1        | 1.02 q < 1         |
| HLA-DRB5  | major histocompatibility complex, class II, DR beta 5                             | Ssc.210.6.S1_x_at  | -1.09 q < 0.484 | 1.05 q < 1         | -1.02 q < 0.989   | 1.21 q < 0.49      | -1.06 q < 1       | -1.81 q < 0.000457 |
| RGS4      | regulator of G-protein signaling 4                                                | Ssc.6384.1.S1_at   | 1.09 q < 0.49   | 1.11 q < 1         | -1.05 q < 0.962   | 1.04 q < 0.891     | -1.09 q < 1       | 1.49 q < 0.0424    |
| CDC42EP1  | CDC42 effector protein (Rho GTPase binding) 1                                     | Ssc.30932.1.S1_at  | -1.06 q < 0.492 | -1.04 q < 1        | -1.33 q < 0.0486  | 1.02 q < 0.938     | -1.02 q < 1       | 1.02 q < 1         |
| SLC39A4   | solute carrier family 39 (zinc transporter), member 4                             | Ssc.27155.1.S1_at  | -1.07 q < 0.492 | 1.12 q < 1         | -1.43 q < 0.0255  | -1.05 q < 0.852    | -1.08 q < 1       | 1.02 q < 1         |
| CNN3      | calponin 3, acidic                                                                | Ssc.4848.1.S1_at   | -1.08 q < 0.492 | 1.05 q < 1         | -1.43 q < 0.0424  | 1.01 q < 0.979     | -1.12 q < 1       | 1.03 q < 1         |
| MBTD1     | mbt domain containing 1                                                           | Ssc.3152.1.A1_at   | 1.1 q < 0.494   | -1.03 q < 1        | -1.05 q < 0.971   | 1.59 q < 0.0371    | 1.03 q < 1        | 1.09 q < 1         |
| ABLIM1    | actin binding LIM protein 1                                                       | Ssc.19823.1.A1_at  | 1.15 q < 0.497  | -1.12 q < 1        | -1.33 q < 0.738   | 1.86 q < 0.045     | 1.34 q < 1        | 1.18 q < 1         |
| ABLIM1    | actin binding LIM protein 1                                                       | Ssc.10988.1.S1_at  | 1.08 q < 0.75   | -1.13 q < 1        | -1.41 q < 0.466   | 1.71 q < 0.0483    | 1.14 q < 1        | 1.22 q < 1         |
| ZNF642    | zinc finger protein 642                                                           | Ssc.14310.1.A1_at  | 1.05 q < 0.498  | 1.02 q < 1         | -1.05 q < 0.918   | 1.28 q < 0.0103    | -1.02 q < 1       | 1.04 q < 1         |
| C6orf124  | chromosome 6 open reading frame 124                                               | Ssc.10978.1.S1_at  | 1.06 q < 0.498  | 1.04 q < 1         | -1.04 q < 0.951   | 1.3 q < 0.0433     | -1.02 q < 1       | 1.04 q < 1         |
| CENPE     | centromere protein E, 312kDa                                                      | Ssc.8766.1.A1_at   | 1.06 q < 0.5    | 1.45 q < 0.00216   | -1.02 q < 0.987   | -1 q < 0.989       | 1.06 q < 1        | -1.12 q < 1        |
| SOSTDC1   | sclerostin domain containing 1                                                    | Ssc.4319.1.A1_at   | -1.09 q < 0.5   | -1.06 q < 1        | -1.02 q < 0.992   | 1.01 q < 0.99      | 1.12 q < 1        | -1.6 q < 0.0108    |
| ABHD14B   | abhydrolase domain containing 14B                                                 | Ssc.4942.1.S1_at   | 1.1 q < 0.505   | -1.08 q < 1        | -1.04 q < 0.974   | 1.59 q < 0.0362    | 1.06 q < 1        | 1.09 q < 1         |
| RAB3GAP2  | RAB3 GTPase activating protein subunit 2 (non-catalytic)                          | Ssc.6809.1.A1_at   | 1.07 q < 0.507  | -1.05 q < 1        | -1.08 q < 0.913   | 1.5 q < 0.00156    | -1.05 q < 1       | 1.08 q < 1         |
| ICAM1     | intercellular adhesion molecule 1                                                 | Ssc.11187.1.S1_at  | -1.06 q < 0.507 | -1.07 q < 1        | -1.43 q < 0.00515 | 1.18 q < 0.35      | 1.06 q < 1        | -1.1 q < 1         |
| C18orf24  | spindle and kinetochore associated complex subunit 1                              | Ssc.27187.1.S1_at  | 1.05 q < 0.51   | 1.28 q < 0.0431    | 1.05 q < 0.932    | -1.01 q < 0.955    | 1.02 q < 1        | -1.06 q < 1        |
| KIF11     | kinesin family member 11                                                          | Ssc.7361.1.A1_at   | 1.06 q < 0.511  | 1.39 q < 0.0062    | -1.01 q < 0.989   | 1.05 q < 0.812     | -1.07 q < 1       | -1.02 q < 1        |
| NR4A3     | nuclear receptor subfamily 4, group A, member 3                                   | Ssc.761.1.S1_at    | 1.08 q < 0.518  | -1.02 q < 1        | 1.02 q < 0.99     | 1.74 q < 0.000189  | -1.2 q < 1        | 1.02 q < 1         |
| FADS2     | fatty acid desaturase 2                                                           | Ssc.29000.1.S1_at  | 1.08 q < 0.518  | 1.46 q < 0.0431    | 1.05 q < 0.958    | 1.06 q < 0.831     | -1.14 q < 1       | 1.02 q < 1         |
| FADS2     | fatty acid desaturase 2                                                           | Ssc.3039.1.S1_at   | 1.07 q < 0.589  | 1.47 q < 0.0492    | 1.03 q < 0.982    | -1 q < 0.999       | -1.12 q < 1       | 1.06 q < 1         |
| LNPEP     | leucyl/cystinyl aminopeptidase                                                    | Ssc.24418.1.A1_at  | -1.06 q < 0.521 | 1.01 q < 1         | -1.05 q < 0.938   | -1.31 q < 0.0442   | -1.1 q < 1        | 1.13 q < 1         |
| AMY2B     | amylase, alpha 2B (pancreatic)                                                    | Ssc.6009.1.S1_a_at | -1.12 q < 0.527 | -2.16 q < 0.000589 | -1.39 q < 0.453   | 1.1 q < 0.815      | 1.44 q < 0.75     | 1.1 q < 1          |
| AMY2B     | amylase, alpha 2B (pancreatic)                                                    | Ssc.6009.1.S1_at   | -1.06 q < 0.822 | -1.94 q < 0.0062   | -1.43 q < 0.366   | 1.04 q < 0.931     | 1.65 q < 0.146    | 1.19 q < 1         |
| CWF19L2   | CWF19-like 2, cell cycle control (S. pombe)                                       | Ssc.18973.1.A1_at  | 1.06 q < 0.53   | -1.05 q < 1        | 1.04 q < 0.958    | 1.35 q < 0.0288    | -1.12 q < 1       | 1.12 q < 1         |
| TAPT1     | transmembrane anterior posterior transformation 1                                 | Ssc.10298.1.A1_at  | 1.07 q < 0.532  | -1.04 q < 1        | -1.24 q < 0.415   | 1.44 q < 0.0164    | 1.31 q < 0.353    | -1.04 q < 1        |
| PARK2     | Parkinson disease (autosomal recessive, juvenile) 2, parkin                       | Ssc.30566.1.A1_at  | -1.06 q < 0.545 | -1.43 q < 0.00291  | -1.04 q < 0.958   | 1.11 q < 0.584     | -1.02 q < 1       | 1.03 q < 1         |
| GOLPH3    | golgi phosphoprotein 3 (coat-protein)                                             | Ssc.3795.1.A1_a_at | 1.09 q < 0.545  | -1.15 q < 1        | -1 q < 0.999      | 1.58 q < 0.0316    | -1.02 q < 1       | 1.16 q < 1         |
| CASP4     | Caspase 4, apoptosis-related cysteine peptidase                                   | Ssc.12446.1.A1_at  | 1.07 q < 0.547  | 1.03 q < 1         | 1.01 q < 0.997    | 1.49 q < 0.00714   | 1.21 q < 1        | -1.34 q < 0.136    |
| EDEM3     | ER degradation enhancer, mannosidase alpha-like 3                                 | Ssc.21755.1.A1_at  | 1.09 q < 0.554  | -1.09 q < 1        | -1.04 q < 0.973   | 1.52 q < 0.0486    | 1.03 q < 1        | 1.11 q < 1         |
| GTF2A1L   | general transcription factor IIA, 1-like                                          | Ssc.21237.1.S1_at  | 1.07 q < 0.556  | 1.74 q < 0.000115  | -1.16 q < 0.763   | -1.01 q < 0.977    | -1.11 q < 1       | 1.06 q < 1         |
| SF3A1     | splicing factor 3a, subunit 1, 120kDa                                             | Ssc.6690.1.S1_at   | 1.07 q < 0.557  | 1.05 q < 1         | -1.07 q < 0.933   | 1.41 q < 0.0336    | 1.03 q < 1        | -1.01 q < 1        |
| NCAPG     | non-SMC condensin I complex, subunit G                                            | Ssc.28512.1.S1_at  | 1.06 q < 0.56   | 1.39 q < 0.0431    | -1.08 q < 0.911   | 1.07 q < 0.768     | 1.07 q < 1        | -1.09 q < 1        |
| EPHA4     | EPH receptor A4                                                                   | Ssc.22130.1.S1_at  | 1.11 q < 0.565  | 1.3 q < 0.849      | -1.15 q < 0.903   | 1.71 q < 0.0324    | -1.26 q < 1       | 1.09 q < 1         |
| LAMA2     | laminin, alpha 2                                                                  | Ssc.10383.1.A1_at  | 1.04 q < 0.571  | -1.03 q < 1        | -1.07 q < 0.847   | 1.05 q < 0.731     | 1.04 q < 1        | 1.23 q < 0.0418    |
| MICAL2    | MICAL-like 2                                                                      | Ssc.2688.1.S1_at   | 1.05 q < 0.572  | -1.1 q < 1         | -1.12 q < 0.682   | 1.35 q < 0.00188   | 1.08 q < 1        | 1.04 q < 1         |
| ABI1      | abl-interactor 1                                                                  | Ssc.21567.2.S1_at  | 1.05 q < 0.584  | -1.05 q < 1        | -1.04 q < 0.951   | 1.28 q < 0.0364    | -1 q < 1          | 1.08 q < 1         |
| MTR       | 5-methyltetrahydrofolate-homocysteine methyltransferase                           | Ssc.19318.1.S1_at  | 1.06 q < 0.592  | -1.12 q < 1        | 1.09 q < 0.91     | 1.39 q < 0.0362    | -1 q < 1          | 1.01 q < 1         |
| HIGD1B    | HIG1 hypoxia inducible domain family, member 1B                                   | Ssc.13089.1.S1_at  | 1.07 q < 0.593  | 1.02 q < 1         | -1.31 q < 0.186   | 1.06 q < 0.815     | -1.04 q < 1       | 1.73 q < 0.0000443 |
| CASP1     | caspase 1, apoptosis-related cysteine peptidase (interleukin 1, beta, convertase) | Ssc.16012.1.S1_at  | -1.07 q < 0.594 | 1.02 q < 1         | 1.08 q < 0.926    | 1.07 q < 0.818     | -1.04 q < 1       | -1.6 q < 0.00402   |
| CDKN3     | cyclin-dependent kinase inhibitor 3                                               | Ssc.7286.1.S1_at   | 1.05 q < 0.594  | 1.33 q < 0.0332    | 1.05 q < 0.943    | 1.02 q < 0.919     | 1.02 q < 1        | -1.13 q < 1        |
| ENDOD1    | endonuclease domain containing 1                                                  | Ssc.12615.1.A1_at  | -1.14 q < 0.594 | -2.18 q < 0.0309   | -1.1 q < 0.954    | 1.1 q < 0.87       | -1.13 q < 1       | 1.26 q < 1         |

| Gene Name | Gene Description                                                                   | Probe Set ID       | Breed MS-WC     | Day 25 MS-WC      | Day 45 MS-WC      | Day 65 MS-WC      | Day 85 MS-WC     | Day 105 MS-WC    |
|-----------|------------------------------------------------------------------------------------|--------------------|-----------------|-------------------|-------------------|-------------------|------------------|------------------|
| HNRNPH1   | heterogeneous nuclear ribonucleoprotein H1 (H)                                     | Ssc.13767.1.A1_at  | 1.1 q < 0.597   | 1.08 q < 1        | -1.21 q < 0.799   | 1.61 q < 0.0463   | -1.02 q < 1      | 1.13 q < 1       |
| CRELD1    | cysteine-rich with EGF-like domains 1                                              | Ssc.1501.1.S1_at   | 1.06 q < 0.606  | 1.01 q < 1        | -1.07 q < 0.918   | 1.4 q < 0.0216    | -1.03 q < 1      | 1.04 q < 1       |
| GSTT1     | glutathione S-transferase theta 1                                                  | Ssc.15549.1.A1_at  | 1.05 q < 0.608  | 1.13 q < 0.888    | -1.1 q < 0.811    | 1.39 q < 0.00141  | -1.11 q < 1      | -1.03 q < 1      |
| HMOX2     | heme oxygenase (decycling) 2                                                       | Ssc.2926.1.S1_at   | 1.06 q < 0.615  | 1.08 q < 1        | -1.18 q < 0.561   | 1.45 q < 0.00581  | 1.05 q < 1       | -1.05 q < 1      |
| IFT52     | intraflagellar transport 52 homolog (Chlamydomonas)                                | Ssc.21557.1.S1_at  | 1.06 q < 0.617  | -1.08 q < 1       | -1.07 q < 0.913   | 1.36 q < 0.0288   | 1.09 q < 1       | 1.03 q < 1       |
| ANP32A    | acidic (leucine-rich) nuclear phosphoprotein 32 family, member A                   | Ssc.2877.1.A1_at   | 1.04 q < 0.62   | 1.37 q < 0.00283  | -1.06 q < 0.912   | -1.07 q < 0.699   | -1.01 q < 1      | 1.04 q < 1       |
| PLEKHH1   | pleckstrin homology domain containing, family H (with MYTH4 domain) member 1       | Ssc.10413.1.A1_at  | -1.07 q < 0.623 | 1.11 q < 1        | -1.56 q < 0.00437 | 1.1 q < 0.693     | -1.13 q < 1      | 1.05 q < 1       |
| XPR1      | xenotropic and polytropic retrovirus receptor 1                                    | Ssc.13519.1.A1_at  | 1.05 q < 0.629  | 1.06 q < 1        | 1.03 q < 0.966    | 1.32 q < 0.0439   | -1.05 q < 1      | -1.07 q < 1      |
| NID2      | nidogen 2 (osteonidogen)                                                           | Ssc.1053.1.S1_at   | -1.12 q < 0.631 | -1.09 q < 1       | -2.01 q < 0.0178  | 1.19 q < 0.695    | -1.01 q < 1      | 1.06 q < 1       |
| DPP7      | dipeptidyl-peptidase 7                                                             | Ssc.1214.1.S1_at   | 1.06 q < 0.633  | -1.28 q < 0.344   | -1.1 q < 0.885    | 1.38 q < 0.0372   | 1.21 q < 1       | 1.11 q < 1       |
| TMEM62    | transmembrane protein 62                                                           | Ssc.1347.1.S1_at   | -1.06 q < 0.635 | 1.01 q < 1        | -1.48 q < 0.00672 | -1.05 q < 0.839   | 1.06 q < 1       | 1.09 q < 1       |
| NBEAL1    | neurobeachin-like 1                                                                | Ssc.7238.1.A1_at   | 1.08 q < 0.638  | -1.09 q < 1       | -1.11 q < 0.913   | 1.52 q < 0.0487   | 1.01 q < 1       | 1.15 q < 1       |
| ANLN      | anillin, actin binding protein                                                     | Ssc.26757.1.A1_at  | 1.06 q < 0.643  | 1.44 q < 0.0489   | -1.11 q < 0.878   | 1.17 q < 0.507    | -1.02 q < 1      | -1.09 q < 1      |
| EIF3F     | eukaryotic translation initiation factor 3, subunit F                              | Ssc.11792.1.A1_at  | -1.05 q < 0.644 | 1.03 q < 1        | -1.34 q < 0.0389  | 1.09 q < 0.671    | 1.03 q < 1       | -1.1 q < 1       |
| PPP5C     | protein phosphatase 5, catalytic subunit                                           | Ssc.18846.1.A1_at  | -1.06 q < 0.646 | -1.39 q < 0.0403  | -1.03 q < 0.975   | 1.18 q < 0.402    | -1.05 q < 1      | -1.03 q < 1      |
| SERPIN6   | serpin peptidase inhibitor, clade B (ovalbumin), member 6                          | Ssc.8895.1.S1_at   | -1.06 q < 0.647 | 1.37 q < 0.07     | -1.38 q < 0.0398  | -1.29 q < 0.134   | -1.06 q < 1      | 1.05 q < 1       |
| GSR       | glutathione reductase                                                              | Ssc.6474.1.S1_at   | 1.05 q < 0.647  | 1.12 q < 1        | -1.12 q < 0.796   | 1.44 q < 0.00397  | -1.06 q < 1      | -1.06 q < 1      |
| PEBP1     | phosphatidylethanolamine binding protein 1                                         | Ssc.11032.1.S1_at  | -1.08 q < 0.649 | 1.2 q < 1         | -1.6 q < 0.0498   | 1.06 q < 0.889    | 1.04 q < 1       | -1.23 q < 1      |
| GMFG      | glia maturation factor, gamma                                                      | Ssc.15370.1.S1_at  | -1.07 q < 0.656 | 1.17 q < 1        | -1.06 q < 0.954   | 1.01 q < 0.983    | -1.02 q < 1      | -1.54 q < 0.0241 |
| CDCA3     | cell division cycle associated 3                                                   | Ssc.18198.1.S1_at  | 1.06 q < 0.666  | 1.44 q < 0.0231   | -1 q < 0.997      | -1.04 q < 0.87    | 1.02 q < 1       | -1.06 q < 1      |
| RING1     | ring finger protein 1                                                              | Ssc.5967.1.A1_at   | 1.05 q < 0.676  | -1.06 q < 1       | 1.01 q < 0.994    | 1.32 q < 0.032    | -1.02 q < 1      | 1.01 q < 1       |
| GAS7      | growth arrest-specific 7                                                           | Ssc.20467.1.S1_at  | -1.05 q < 0.68  | -1.43 q < 0.00241 | 1.01 q < 0.996    | 1.26 q < 0.107    | 1.05 q < 1       | -1.16 q < 0.839  |
| HLA-DMB   | major histocompatibility complex, class II, DM beta                                | Ssc.11025.1.S1_at  | -1.05 q < 0.693 | -1.03 q < 1       | -1.04 q < 0.956   | 1.06 q < 0.78     | 1.07 q < 1       | -1.35 q < 0.0468 |
| SAMD12    | sterile alpha motif domain containing 12                                           | Ssc.29319.1.A1_at  | 1.05 q < 0.694  | -1.09 q < 1       | 1.05 q < 0.938    | 1.38 q < 0.0129   | -1.07 q < 1      | 1.01 q < 1       |
| CASP7     | caspase 7, apoptosis-related cysteine peptidase                                    | Ssc.3773.1.S1_at   | -1.08 q < 0.696 | -1.22 q < 1       | -1.82 q < 0.0115  | 1.15 q < 0.712    | 1.36 q < 1       | -1.06 q < 1      |
| METTL9    | methyltransferase like 9                                                           | Ssc.20160.1.S1_at  | 1.05 q < 0.697  | 1.04 q < 1        | 1.41 q < 0.0343   | -1.28 q < 0.166   | -1 q < 1         | 1.14 q < 1       |
| DOCK1     | dedicator of cytokinesis 1                                                         | Ssc.7408.1.A1_at   | 1.07 q < 0.698  | -1.05 q < 1       | -1.08 q < 0.94    | 1.58 q < 0.0232   | -1.01 q < 1      | 1.02 q < 1       |
| HPS3      | Hermansky-Pudlak syndrome 3                                                        | Ssc.8819.1.A1_at   | -1.05 q < 0.699 | -1 q < 1          | -1.44 q < 0.0223  | 1.12 q < 0.611    | -1.05 q < 1      | 1.03 q < 1       |
| ROR1      | receptor tyrosine kinase-like orphan receptor 1                                    | Ssc.29681.1.A1_at  | 1.05 q < 0.702  | -1.18 q < 0.671   | -1.01 q < 0.99    | 1.04 q < 0.851    | 1.06 q < 1       | 1.35 q < 0.0299  |
| ROR1      | RAR-related orphan receptor A                                                      | Ssc.29681.1.A1_at  | 1.05 q < 0.702  | -1.18 q < 0.671   | -1.01 q < 0.99    | 1.04 q < 0.851    | 1.06 q < 1       | 1.35 q < 0.0299  |
| C13orf16  | chromosome 13 open reading frame 16                                                | Ssc.2130.1.S1_at   | -1.04 q < 0.705 | -1.05 q < 1       | -1.35 q < 0.0175  | 1.06 q < 0.77     | -1.04 q < 1      | 1.13 q < 1       |
| ATIC      | 5-aminoimidazole-4-carboxamide ribonucleotide formyltransferase/IMP cyclohydrolase | Ssc.27454.1.S1_at  | 1.05 q < 0.706  | 1.46 q < 0.0214   | 1.02 q < 0.988    | -1.11 q < 0.67    | -1.01 q < 1      | -1.02 q < 1      |
| C11orf17  | chromosome 11 open reading frame 17                                                | Ssc.11695.1.S1_at  | -1.05 q < 0.707 | 1.03 q < 1        | -1.35 q < 0.0367  | 1.13 q < 0.529    | -1.06 q < 1      | -1.01 q < 1      |
| C2        | complement component 2                                                             | Ssc.19364.1.S1_at  | -1.05 q < 0.711 | 1.07 q < 1        | -1.12 q < 0.853   | 1.13 q < 0.595    | 1.04 q < 1       | -1.45 q < 0.0191 |
| WNK1      | WNK lysine deficient protein kinase 1                                              | Ssc.5955.1.A1_at   | -1.04 q < 0.714 | 1.22 q < 0.139    | -1.26 q < 0.0428  | -1.05 q < 0.76    | -1.08 q < 1      | -1.02 q < 1      |
| C16orf33  | small nuclear ribonucleoprotein 25kDa (U11/U12)                                    | Ssc.10863.1.A1_at  | 1.04 q < 0.715  | 1.42 q < 0.00191  | -1.03 q < 0.967   | -1.11 q < 0.546   | 1.06 q < 1       | -1.08 q < 1      |
| BF710262  | -                                                                                  | Ssc.9331.1.A1_at   | -1.05 q < 0.716 | -1.03 q < 1       | -1.03 q < 0.973   | -1.49 q < 0.00269 | -1.07 q < 1      | 1.35 q < 0.0727  |
| HLA-DRB3  | major histocompatibility complex, class II, DR beta 3                              | Ssc.30586.1.A1_at  | 1.04 q < 0.719  | -1.02 q < 1       | -1.08 q < 0.886   | 1.3 q < 0.0277    | 1 q < 1          | 1.02 q < 1       |
| CD74      | CD74 molecule, major histocompatibility complex, class II invariant chain          | Ssc.6222.1.S1_a_at | -1.08 q < 0.721 | 1.44 q < 0.323    | -1.21 q < 0.799   | -1.01 q < 0.991   | 1.06 q < 1       | -1.79 q < 0.0075 |
| UBD       | ubiquitin D                                                                        | Ssc.21582.1.S1_at  | -1.07 q < 0.724 | -1.03 q < 1       | 1.11 q < 0.915    | 1.09 q < 0.817    | -1 q < 1         | -1.65 q < 0.0243 |
| C13orf15  | chromosome 13 open reading frame 15                                                | Ssc.9553.1.A1_s_at | -1.04 q < 0.729 | -1.04 q < 1       | -1.09 q < 0.824   | 1.34 q < 0.004    | -1.27 q < 0.0672 | -1.1 q < 1       |
| C13orf15  | chromosome 13 open reading frame 15                                                | Ssc.23963.1.S1_at  | 1.06 q < 0.833  | 1.41 q < 0.53     | -1.17 q < 0.884   | 1.73 q < 0.0329   | -1.45 q < 0.744  | -1.07 q < 1      |
| SRPX      | sushi-repeat-containing protein, X-linked                                          | Ssc.897.1.S1_at    | 1.07 q < 0.73   | -1.6 q < 0.0738   | 1.67 q < 0.0307   | 1.32 q < 0.353    | 1.2 q < 1        | -1.15 q < 1      |
| UBE4A     | ubiquitination factor E4A (UFD2 homolog, yeast)                                    | Ssc.8329.1.A1_at   | 1.04 q < 0.734  | 1.01 q < 1        | -1.18 q < 0.529   | 1.36 q < 0.0242   | 1.04 q < 1       | 1.02 q < 1       |



| Gene Name | Gene Description                                                                                                                                         | Probe Set ID       | Breed MS-WC     | Day 25 MS-WC      | Day 45 MS-WC       | Day 65 MS-WC      | Day 85 MS-WC   | Day 105 MS-WC   |
|-----------|----------------------------------------------------------------------------------------------------------------------------------------------------------|--------------------|-----------------|-------------------|--------------------|-------------------|----------------|-----------------|
| SLC3A1    | solute carrier family 3 (cystine, dibasic and neutral amino acid transporters, activator of cystine, dibasic and neutral amino acid transport), member 1 | Ssc.2441.2.A1_at   | -1.05 q < 0.738 | 1.25 q < 0.579    | -1.57 q < 0.00418  | -1.01 q < 0.985   | -1.25 q < 1    | 1.22 q < 0.814  |
| CCDC120   | coiled-coil domain containing 120                                                                                                                        | Ssc.17126.2.S1_at  | 1.05 q < 0.746  | -1.12 q < 1       | -1.05 q < 0.952    | 1.48 q < 0.0165   | 1.03 q < 1     | -1 q < 1        |
| MCM2      | minichromosome maintenance complex component 2                                                                                                           | Ssc.21350.1.S1_at  | 1.03 q < 0.746  | 1.33 q < 0.0091   | -1.12 q < 0.703    | 1.03 q < 0.877    | 1.02 q < 1     | -1.06 q < 1     |
| MCM2      | minichromosome maintenance complex component 2                                                                                                           | Ssc.1408.2.S1_at   | 1.02 q < 0.908  | 1.37 q < 0.0152   | -1.06 q < 0.928    | -1.02 q < 0.925   | 1.03 q < 1     | -1.18 q < 0.717 |
| MCM2      | minichromosome maintenance complex component 7                                                                                                           | Ssc.21350.1.S1_at  | 1.03 q < 0.746  | 1.33 q < 0.0091   | -1.12 q < 0.703    | 1.03 q < 0.877    | 1.02 q < 1     | -1.06 q < 1     |
| MCM2      | minichromosome maintenance complex component 7                                                                                                           | Ssc.1408.2.S1_at   | 1.02 q < 0.908  | 1.37 q < 0.0152   | -1.06 q < 0.928    | -1.02 q < 0.925   | 1.03 q < 1     | -1.18 q < 0.717 |
| BRE       | brain and reproductive organ-expressed (TNFRSF1A modulator)                                                                                              | Ssc.9240.3.S1_a_at | 1.05 q < 0.751  | -1 q < 1          | -1.08 q < 0.913    | 1.44 q < 0.0106   | 1 q < 1        | -1.06 q < 1     |
| UTX       | lysine (K)-specific demethylase 6A                                                                                                                       | Ssc.8310.1.A1_at   | 1.05 q < 0.759  | -1 q < 1          | -1.16 q < 0.772    | 1.43 q < 0.034    | -1.06 q < 1    | 1.1 q < 1       |
| PPFIA2    | protein tyrosine phosphatase, receptor type, f polypeptide (PTPRF), interacting protein (liprin), alpha 2                                                | Ssc.5203.1.A1_at   | 1.04 q < 0.762  | -1.06 q < 1       | 1.01 q < 0.989     | 1.35 q < 0.0219   | -1.09 q < 1    | 1.02 q < 1      |
| DLGAP5    | discs, large (Drosophila) homolog-associated protein 5                                                                                                   | Ssc.19504.1.A1_at  | 1.05 q < 0.765  | 1.57 q < 0.00283  | -1.04 q < 0.958    | -1.05 q < 0.86    | -1.03 q < 1    | -1.1 q < 1      |
| RABEP1    | rabaptin, RAB GTPase binding effector protein 1                                                                                                          | Ssc.21275.1.A1_at  | 1.04 q < 0.777  | -1.03 q < 1       | -1.13 q < 0.719    | 1.31 q < 0.0424   | 1.03 q < 1     | 1.04 q < 1      |
| EZH2      | enhancer of zeste homolog 2 (Drosophila)                                                                                                                 | Ssc.5073.1.A1_at   | 1.04 q < 0.777  | 1.36 q < 0.0169   | -1.04 q < 0.951    | -1 q < 0.998      | -1.03 q < 1    | -1.06 q < 1     |
| MRAS      | muscle RAS oncogene homolog                                                                                                                              | Ssc.24201.1.A1_at  | 1.03 q < 0.779  | -1.04 q < 1       | -1.02 q < 0.975    | 1.25 q < 0.0481   | -1.03 q < 1    | 1.02 q < 1      |
| SH3BP5    | SH3-domain binding protein 5 (BTK-associated)                                                                                                            | Ssc.25282.1.S1_at  | -1.06 q < 0.779 | 1.07 q < 1        | -1.63 q < 0.0165   | -1.06 q < 0.86    | -1.08 q < 1    | 1.32 q < 0.592  |
| TBCEL     | tubulin folding cofactor E-like                                                                                                                          | Ssc.23894.1.A1_at  | 1.03 q < 0.78   | -1.04 q < 1       | 1.08 q < 0.835     | 1.24 q < 0.0415   | -1.11 q < 1    | -1 q < 1        |
| ACO1      | aconitase 1, soluble                                                                                                                                     | Ssc.26682.1.A1_at  | -1.08 q < 0.78  | 1.27 q < 0.991    | -1.83 q < 0.0232   | 1.23 q < 0.589    | -1.02 q < 1    | -1.21 q < 1     |
| ZFAND2A   | zinc finger, AN1-type domain 2A                                                                                                                          | Ssc.5082.1.A1_at   | 1.04 q < 0.789  | -1.02 q < 1       | -1.19 q < 0.586    | 1.42 q < 0.0218   | -1.01 q < 1    | 1.08 q < 1      |
| LRRTM4    | leucine rich repeat transmembrane neuronal 4                                                                                                             | Ssc.29330.1.S1_at  | -1.04 q < 0.796 | -1.4 q < 0.0114   | 1.07 q < 0.91      | 1.09 q < 0.661    | -1.02 q < 1    | 1.02 q < 1      |
| GPNMB     | glycoprotein (transmembrane) nmb                                                                                                                         | Ssc.18572.2.S1_at  | -1.03 q < 0.804 | -1.06 q < 1       | 1.01 q < 0.988     | -1.34 q < 0.0126  | 1.06 q < 1     | 1.13 q < 1      |
| GPNMB     | glycoprotein (transmembrane) nmb                                                                                                                         | Ssc.18572.1.S1_at  | -1.05 q < 0.865 | -1 q < 1          | 1 q < 1            | -2 q < 0.00295    | 1.42 q < 0.885 | 1.09 q < 1      |
| CAPZA2    | capping protein (actin filament) muscle Z-line, alpha 2                                                                                                  | Ssc.4047.3.S1_at   | 1.03 q < 0.812  | -1.04 q < 1       | -1.19 q < 0.404    | 1.33 q < 0.0168   | 1.03 q < 1     | 1.05 q < 1      |
| CDK6      | cyclin-dependent kinase 6                                                                                                                                | Ssc.9474.1.A1_at   | 1.03 q < 0.814  | -1.12 q < 0.972   | -1 q < 0.997       | 1.29 q < 0.0397   | -1.03 q < 1    | 1.05 q < 1      |
| ANKRD52   | ankyrin repeat domain 52                                                                                                                                 | Ssc.19594.1.S1_at  | 1.03 q < 0.82   | -1.05 q < 1       | -1.08 q < 0.883    | 1.29 q < 0.0448   | -1.01 q < 1    | 1.04 q < 1      |
| CYP3A7    | cytochrome P450, family 3, subfamily A, polypeptide 7                                                                                                    | Ssc.203.1.S1_s_at  | 1.06 q < 0.829  | -1.04 q < 1       | 1.89 q < 0.0125    | 1.02 q < 0.968    | 1.18 q < 1     | -1.6 q < 0.165  |
| SLC26A11  | solute carrier family 26, member 11                                                                                                                      | Ssc.18186.1.S1_at  | -1.05 q < 0.83  | 1.11 q < 1        | -1.77 q < 0.000807 | 1.35 q < 0.183    | -1.12 q < 1    | 1.05 q < 1      |
| SLC41A1   | solute carrier family 41, member 1                                                                                                                       | Ssc.12083.3.A1_at  | 1.03 q < 0.833  | -1.06 q < 1       | 1.02 q < 0.981     | 1.3 q < 0.0393    | -1.09 q < 1    | 1 q < 1         |
| MAP1B     | microtubule-associated protein 1B                                                                                                                        | Ssc.6093.1.S1_at   | 1.04 q < 0.835  | 1.57 q < 0.00216  | -1.02 q < 0.989    | -1.12 q < 0.638   | 1.04 q < 1     | -1.19 q < 0.938 |
| MAP1B     | microtubule-associated protein 1B                                                                                                                        | Ssc.6093.2.A1_at   | 1.04 q < 0.882  | 1.61 q < 0.00899  | -1.07 q < 0.944    | -1.1 q < 0.751    | 1.06 q < 1     | -1.23 q < 0.87  |
| DAO       | D-amino-acid oxidase                                                                                                                                     | Ssc.8031.1.A1_at   | -1.04 q < 0.838 | 1.14 q < 1        | 1.29 q < 0.217     | -1.47 q < 0.00887 | -1.11 q < 1    | -1.07 q < 1     |
| DAO       | amiloride binding protein 1 (amine oxidase (copper-containing))                                                                                          | Ssc.8031.1.A1_at   | -1.04 q < 0.838 | 1.14 q < 1        | 1.29 q < 0.217     | -1.47 q < 0.00887 | -1.11 q < 1    | -1.07 q < 1     |
| PNKD      | paroxysmal nonkinetogenic dyskinesia                                                                                                                     | Ssc.3681.1.S1_at   | 1.05 q < 0.851  | 1.29 q < 0.805    | -1.36 q < 0.433    | 1.62 q < 0.0364   | -1.17 q < 1    | -1.03 q < 1     |
| ZNF655    | zinc finger protein 655                                                                                                                                  | Ssc.2910.1.A1_at   | 1.05 q < 0.853  | -1.22 q < 0.972   | -1.18 q < 0.828    | 1.57 q < 0.0398   | 1.25 q < 1     | -1.08 q < 1     |
| TNNI3K    | TNNI3 interacting kinase                                                                                                                                 | Ssc.26763.1.S1_at  | 1.03 q < 0.856  | -1.04 q < 1       | 1 q < 0.997        | 1.34 q < 0.014    | -1.05 q < 1    | -1.08 q < 1     |
| SLCO4C1   | solute carrier organic anion transporter family, member 4C1                                                                                              | Ssc.27370.1.S1_at  | 1.06 q < 0.861  | 1.04 q < 1        | -1.47 q < 0.488    | 1.86 q < 0.0486   | -1.07 q < 1    | 1.12 q < 1      |
| CN166389  | -                                                                                                                                                        | Ssc.27411.1.A1_at  | 1.03 q < 0.862  | -1.55 q < 0.00241 | -1.04 q < 0.964    | 1.23 q < 0.298    | 1.22 q < 1     | 1.26 q < 0.46   |
| LIF       | leukemia inhibitory factor (cholinergic differentiation factor)                                                                                          | Ssc.21256.1.S2_at  | 1.07 q < 0.863  | 1.06 q < 1        | -1.02 q < 0.996    | 2.19 q < 0.00883  | -1.45 q < 1    | -1.14 q < 1     |
| PRDX1     | peroxiredoxin 1                                                                                                                                          | Ssc.5380.1.S1_at   | -1.05 q < 0.863 | 1.72 q < 0.0261   | -1.3 q < 0.593     | 1.01 q < 0.981    | -1.35 q < 1    | -1.26 q < 1     |
| HECW2     | HECT, C2 and WW domain containing E3 ubiquitin protein ligase 2                                                                                          | Ssc.1451.1.S1_at   | 1.03 q < 0.868  | 1.11 q < 1        | -1.24 q < 0.448    | -1.04 q < 0.901   | -1.11 q < 1    | 1.5 q < 0.0112  |
| UBL3      | ubiquitin-like 3                                                                                                                                         | Ssc.6872.2.S1_at   | 1.04 q < 0.869  | -1.04 q < 1       | -1.21 q < 0.734    | 1.52 q < 0.0401   | -1.07 q < 1    | 1.07 q < 1      |
| SEPW1     | selenoprotein W, 1                                                                                                                                       | Ssc.5062.1.S1_at   | -1.03 q < 0.871 | 1.33 q < 0.178    | -1.6 q < 0.00114   | -1.02 q < 0.939   | -1.07 q < 1    | 1.12 q < 1      |
| GYG1      | glycogenin 1                                                                                                                                             | Ssc.4204.1.S1_at   | 1.05 q < 0.879  | 2.05 q < 0.00235  | -1.32 q < 0.63     | 1.13 q < 0.754    | -1.14 q < 1    | -1.22 q < 1     |
| SPARCL1   | SPARC-like 1 (hevin)                                                                                                                                     | Ssc.6531.1.A1_at   | -1.05 q < 0.885 | 1.04 q < 1        | -2.19 q < 0.00112  | 1.33 q < 0.431    | -1.24 q < 1    | 1.54 q < 0.307  |
| KIF20A    | kinesin family member 20A                                                                                                                                | Ssc.3227.1.A1_a_at | 1.02 q < 0.887  | 1.35 q < 0.0246   | -1.07 q < 0.913    | -1.03 q < 0.902   | -1.03 q < 1    | -1.06 q < 1     |

| Gene Name | Gene Description                                                                     | Probe Set ID        | Breed MS-WC     | Day 25 MS-WC       | Day 45 MS-WC      | Day 65 MS-WC        | Day 85 MS-WC    | Day 105 MS-WC    |
|-----------|--------------------------------------------------------------------------------------|---------------------|-----------------|--------------------|-------------------|---------------------|-----------------|------------------|
| CC2D2A    | coiled-coil and C2 domain containing 2A                                              | Ssc.18099.1.A1_at   | 1.02 q < 0.892  | -1.02 q < 1        | -1.08 q < 0.878   | 1.32 q < 0.0115     | -1.09 q < 1     | 1 q < 1          |
| Q8N8A0    | -                                                                                    | Ssc.10548.1.A1_at   | 1.03 q < 0.897  | 1.02 q < 1         | -1.1 q < 0.885    | -1.01 q < 0.976     | -1.14 q < 1     | 1.41 q < 0.0335  |
| FRRS1     | ferric-chelate reductase 1                                                           | Ssc.25253.1.S1_at   | -1.04 q < 0.901 | -1.71 q < 0.0103   | -1.02 q < 0.99    | 1.17 q < 0.618      | 1.24 q < 1      | 1.01 q < 1       |
| PGD       | phosphogluconate dehydrogenase                                                       | Ssc.16347.1.S1_at   | -1.03 q < 0.902 | 1.61 q < 0.0243    | -1.52 q < 0.0676  | -1.12 q < 0.719     | -1.03 q < 1     | -1.09 q < 1      |
| ZFP36     | zinc finger protein 36, C3H type, homolog (mouse)                                    | Ssc.3411.1.A1_at    | 1.03 q < 0.902  | -1.09 q < 1        | 1.02 q < 0.992    | 1.57 q < 0.0243     | -1.08 q < 1     | -1.15 q < 1      |
| OSBPL6    | oxysterol binding protein-like 6                                                     | Ssc.9483.1.A1_s_at  | 1.03 q < 0.908  | 1.04 q < 1         | -1.66 q < 0.00161 | 1.14 q < 0.603      | 1.2 q < 1       | 1.34 q < 0.283   |
| CCL5      | chemokine (C-C motif) ligand 5                                                       | Ssc.22030.1.S1_at   | -1.02 q < 0.917 | 1.01 q < 1         | 1.04 q < 0.946    | 1.09 q < 0.654      | 1.07 q < 1      | -1.34 q < 0.0252 |
| NGFRAP1   | nerve growth factor receptor (TNFRSF16) associated protein 1                         | Ssc.7039.1.A1_at    | 1.04 q < 0.92   | 1.27 q < 1         | -2.06 q < 0.00351 | 1.28 q < 0.505      | 1.52 q < 0.547  | 1 q < 1          |
| TNN       | tenascin N                                                                           | Ssc.5738.1.A1_at    | 1.02 q < 0.92   | -1.14 q < 0.911    | 1.36 q < 0.015    | 1 q < 0.988         | -1.07 q < 1     | -1.03 q < 1      |
| UBE2T     | ubiquitin-conjugating enzyme E2T (putative)                                          | Ssc.19169.1.S1_at   | 1.02 q < 0.92   | 1.37 q < 0.0425    | -1.06 q < 0.938   | -1.04 q < 0.854     | -1.07 q < 1     | -1.06 q < 1      |
| F5        | coagulation factor V (proaccelerin, labile factor)                                   | Ssc.15822.1.S1_at   | 1.03 q < 0.923  | 1.7 q < 0.0328     | -1.07 q < 0.956   | -1.12 q < 0.751     | -1.01 q < 1     | -1.21 q < 1      |
| ANKRD17   | ankyrin repeat domain 17                                                             | Ssc.30178.1.A1_at   | 1.02 q < 0.923  | -1.1 q < 1         | 1 q < 0.999       | 1.36 q < 0.0448     | -1.1 q < 1      | -1.02 q < 1      |
| NCL       | nucleolin                                                                            | Ssc.2695.1.S1_at    | -1.03 q < 0.925 | -1.06 q < 1        | -2.03 q < 0.00454 | 1.68 q < 0.0625     | 1.15 q < 1      | -1.07 q < 1      |
| HNRNPL    | heterogeneous nuclear ribonucleoprotein L                                            | Ssc.16767.1.S1_at   | 1.03 q < 0.927  | -1.53 q < 0.31     | -1.54 q < 0.221   | 2.99 q < 0.00000247 | 1.01 q < 1      | -1.08 q < 1      |
| TPX2      | TPX2, microtubule-associated, homolog (Xenopus laevis)                               | Ssc.12104.1.S1_at   | 1.02 q < 0.931  | 1.52 q < 0.0178    | -1.12 q < 0.879   | -1.07 q < 0.796     | -1.04 q < 1     | -1.1 q < 1       |
| GLRX3     | glutaredoxin 3                                                                       | Ssc.20426.1.S1_at   | -1.02 q < 0.932 | 1.44 q < 0.0243    | -1.23 q < 0.436   | -1.09 q < 0.734     | -1.01 q < 1     | -1.17 q < 0.99   |
| GRM7      | glutamate receptor, metabotropic 7                                                   | Ssc.25253.2.A1_at   | -1.02 q < 0.932 | -1.68 q < 0.0114   | 1.01 q < 0.997    | 1.2 q < 0.532       | 1.15 q < 1      | 1.07 q < 1       |
| USO1      | USO1 vesicle docking protein homolog (yeast)                                         | Ssc.30740.1.A1_at   | 1.01 q < 0.933  | -1.16 q < 0.554    | -1.01 q < 0.993   | 1.28 q < 0.0323     | -1.01 q < 1     | -1.01 q < 1      |
| DBI       | diazepam binding inhibitor (GABA receptor modulator, acyl-CoA binding protein)       | Ssc.396.1.S1_a_at   | 1.03 q < 0.935  | 1.93 q < 0.00208   | -1.36 q < 0.466   | -1.09 q < 0.822     | -1.14 q < 1     | 1 q < 1          |
| DBI       | translocator protein (18kDa)                                                         | Ssc.396.1.S1_a_at   | 1.03 q < 0.935  | 1.93 q < 0.00208   | -1.36 q < 0.466   | -1.09 q < 0.822     | -1.14 q < 1     | 1 q < 1          |
| LENG8     | leukocyte receptor cluster (LRC) member 8                                            | Ssc.21653.1.S1_at   | 1.02 q < 0.935  | -1.05 q < 1        | -1.29 q < 0.222   | 1.44 q < 0.017      | -1.01 q < 1     | 1.05 q < 1       |
| LENG8     | leukocyte receptor cluster (LRC) member 8                                            | Ssc.21653.2.S1_a_at | 1.01 q < 0.98   | 1 q < 1            | -1.39 q < 0.0485  | 1.36 q < 0.0582     | 1 q < 1         | 1.06 q < 1       |
| AP2B1     | adaptor-related protein complex 2, beta 1 subunit                                    | Ssc.6040.2.S1_at    | -1.01 q < 0.945 | -1.12 q < 0.683    | -1 q < 0.996      | -1.22 q < 0.0382    | 1.15 q < 0.722  | 1.14 q < 0.528   |
| TUSC4     | nitrogen permease regulator-like 2 (S. cerevisiae)                                   | Ssc.3460.1.S1_at    | 1.02 q < 0.95   | 1.1 q < 1          | -1.25 q < 0.356   | 1.38 q < 0.044      | -1.03 q < 1     | -1.09 q < 1      |
| SRGAP2    | SLIT-ROBO Rho GTPase activating protein 2                                            | Ssc.8412.1.A1_at    | 1.01 q < 0.95   | -1.08 q < 1        | -1.05 q < 0.943   | 1.33 q < 0.0398     | -1.04 q < 1     | -1.06 q < 1      |
| SRGAP2    | SLIT-ROBO Rho GTPase activating protein 3                                            | Ssc.8412.1.A1_at    | 1.01 q < 0.95   | -1.08 q < 1        | -1.05 q < 0.943   | 1.33 q < 0.0398     | -1.04 q < 1     | -1.06 q < 1      |
| MAFF      | v-maf musculoaponeurotic fibrosarcoma oncogene homolog F (avian)                     | Ssc.14224.1.A1_at   | 1.02 q < 0.951  | -1.08 q < 1        | -1.07 q < 0.94    | 1.59 q < 0.00273    | -1.14 q < 1     | -1.11 q < 1      |
| NP_997182 | -                                                                                    | Ssc.7217.1.A1_at    | -1.01 q < 0.954 | -1.35 q < 0.0168   | 1.01 q < 0.996    | 1.04 q < 0.833      | 1.04 q < 1      | 1.17 q < 0.752   |
| WWC3      | WWC family member 3                                                                  | Ssc.23073.1.A1_at   | 1.02 q < 0.955  | 1.06 q < 1         | -1.45 q < 0.273   | 1.62 q < 0.0493     | -1.09 q < 1     | 1.02 q < 1       |
| GCLC      | glutamate-cysteine ligase, catalytic subunit                                         | Ssc.2166.1.A1_at    | 1.02 q < 0.955  | 1.03 q < 1         | -1.19 q < 0.718   | 1.59 q < 0.0052     | -1.32 q < 0.622 | 1.04 q < 1       |
| MCM5      | minichromosome maintenance complex component 5                                       | Ssc.16649.1.S1_a_at | 1.01 q < 0.955  | 1.41 q < 0.0132    | -1.08 q < 0.895   | -1.04 q < 0.864     | -1.03 q < 1     | -1.13 q < 1      |
| TAF7L     | TAF7-like RNA polymerase II, TATA box binding protein (TBP)-associated factor, 50kDa | Ssc.19829.1.S1_at   | 1.01 q < 0.959  | -1.01 q < 1        | -1.14 q < 0.827   | 1.52 q < 0.0068     | -1.26 q < 0.83  | 1.02 q < 1       |
| SPC24     | SPC24, NDC80 kinetochore complex component, homolog (S. cerevisiae)                  | Ssc.19196.1.A1_at   | 1.01 q < 0.959  | 1.29 q < 0.0467    | -1.04 q < 0.951   | -1.01 q < 0.95      | -1.05 q < 1     | -1.12 q < 1      |
| RYR2      | ryanodine receptor 2 (cardiac)                                                       | Ssc.25615.1.A1_at   | -1.02 q < 0.965 | -2.1 q < 0.0313    | -1.03 q < 0.992   | 1.45 q < 0.389      | 1.15 q < 1      | 1.14 q < 1       |
| DDHD2     | DDHD domain containing 2                                                             | Ssc.1796.1.A1_at    | 1.02 q < 0.967  | -1.79 q < 0.0149   | 1.02 q < 0.991    | 1.25 q < 0.503      | -1.04 q < 1     | 1.58 q < 0.12    |
| RNF157    | ring finger protein 157                                                              | Ssc.25948.1.S1_at   | -1.01 q < 0.967 | 1.45 q < 0.00959   | -1.1 q < 0.879    | -1.03 q < 0.924     | -1.16 q < 1     | -1.17 q < 0.923  |
| CCNB1     | cyclin B1                                                                            | Ssc.14243.1.S1_at   | 1.01 q < 0.968  | 1.61 q < 0.0185    | -1.12 q < 0.897   | -1.04 q < 0.913     | -1.09 q < 1     | -1.18 q < 1      |
| EIF4EBP3  | eukaryotic translation initiation factor 4E binding protein 3                        | Ssc.26393.1.S1_at   | -1.01 q < 0.97  | 1.02 q < 1         | 1.09 q < 0.777    | -1.24 q < 0.0349    | 1.03 q < 1      | 1.06 q < 1       |
| COX17     | COX17 cytochrome c oxidase assembly homolog (S. cerevisiae)                          | Ssc.16607.1.A1_at   | 1.01 q < 0.976  | 1.48 q < 0.0000507 | -1.26 q < 0.0703  | -1.08 q < 0.627     | 1.03 q < 1      | -1.08 q < 1      |
| PROM1     | prominin 1                                                                           | Ssc.4065.1.A1_at    | 1.01 q < 0.976  | 1.3 q < 0.00543    | -1.02 q < 0.977   | -1.21 q < 0.0796    | -1.21 q < 0.187 | 1.18 q < 0.3     |
| DPP6      | dipeptidyl-peptidase 6                                                               | Ssc.9815.1.A1_at    | 1.01 q < 0.978  | -1.18 q < 0.869    | -1.16 q < 0.752   | 1.52 q < 0.00581    | -1.07 q < 1     | 1.01 q < 1       |
| NOS2A     | nitric oxide synthase 2, inducible                                                   | Ssc.16117.1.S1_at   | 1.01 q < 0.982  | -1.14 q < 1        | -1.21 q < 0.492   | 1.49 q < 0.00404    | -1.05 q < 1     | -1 q < 1         |
| Q62VE2    | -                                                                                    | Ssc.17403.1.S1_at   | -1.01 q < 0.984 | -1.81 q < 0.000086 | 1.01 q < 0.997    | 1.28 q < 0.253      | 1.08 q < 1      | 1.26 q < 0.676   |
| PODXL     | podocalyxin-like                                                                     | Ssc.26067.1.S1_at   | -1.01 q < 0.994 | 2.06 q < 0.0457    | -1.32 q < 0.789   | -1.14 q < 0.813     | -1.22 q < 1     | -1.16 q < 1      |
| LAPTM4B   | lysosomal protein transmembrane 4 beta                                               | Ssc.13846.1.A1_at   | -1 q < 0.996    | 1.45 q < 0.372     | -1.17 q < 0.878   | -1.73 q < 0.0223    | 1.11 q < 1      | 1.24 q < 1       |
